# Supplementary material for: Fumonisin B1-Induced Changes in Cotton Fiber Elongation Revealed by Sphingolipidomics and Proteomics
Source: MDPI journal article supplement (doi:10.3390/biom10091258), 2020-08-31
Supplement: s1 [file s1]

## Supplementary Material

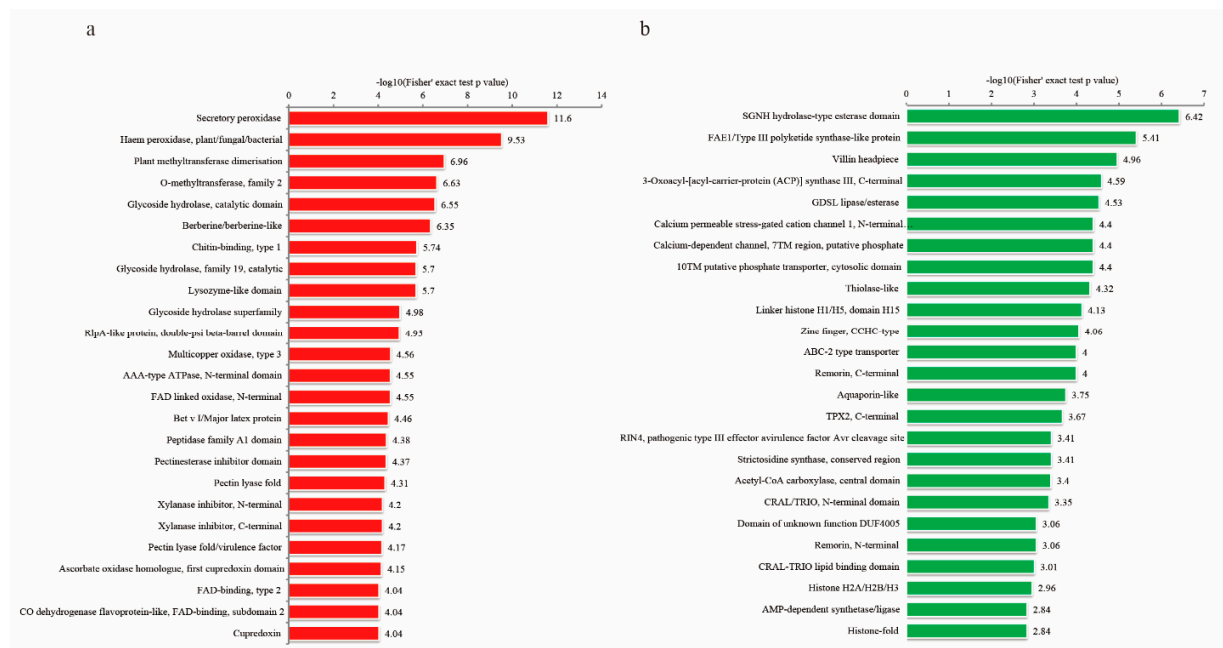

Figure S1. Protein domain enrichment analysis of the DEPs in the control and the FB1 samples. (a) Up-regulated proteins (red bars); (b) Down-regulated proteins (green bars).
