# Supplementary material for: Fumonisin B1-Induced Changes in Cotton Fiber Elongation Revealed by Sphingolipidomics and Proteomics
Source: Biomolecules. 2020 Aug 31;10(9):1258. doi: 10.3390/biom10091258 (PMC7564794; doi:10.3390/biom10091258)
Supplement: Supplementary file 1 [file biomolecules-10-01258-s001.zip › Table S1.xlsx]

## Sheet: Sheet1
Primer name	Primer sequence (5'-3')	gene ID in cotton FGD
4CL-F	CGACGTCGTAGCGCTTCCTTAT	Gh_D10G0473
4CL-R	CTCGTGACCAAACCTTTGTGCG	Gh_D10G0473
CSE-F	GCTGTTTTCGCCGCTGATCTTC	Gh_A02G1201
CSE-R	TTCACCAAACAGGAATGCGGGT	Gh_A02G1201
COMT1-F	AAGCAGATGGCCAGGTTGACAG	Gh_A12G2188
COMT1-R	GACAAGGATCCTCCACTTGGGC	Gh_A12G2188
COMT2-F	TGCTGCTTTGCTTCGTCTCCAT	Gh_D08G2702
COMT2-R	CCACTTGGCTCACACCCTCAAA	Gh_D08G2702
COMT3-F	CTCTTCAGTGCTGCCCATGTCA	Gh_Sca010598G01
COMT3-R	CCACGATTCCATGGCTGGCTAA	Gh_Sca010598G01
CAD-F	CCGACCATGCGACTCAGACAAT	Gh_D12G0195
CAD-R	CTTGGGTGGGTTTTCCGTCAGT	Gh_D12G0195
POD1-F	TGTTCAAAGACAGCTCCCTGGC	Gh_A08G0747
POD1-R	CTATGGTGTGTGCACCGGACAA	Gh_A08G0747
POD2-F	GAGCCTTGCCGTTATTGCAACC	Gh_A11G3132
POD2-R	CGTCTCCGCCTTTGGGACATAG	Gh_A11G3132
POD3-F	GTTCCGACGGGAAGACGAGATG	Gh_A08G1950
POD3-R	CCATACTTGGGTCGGGTTTCCC	Gh_A08G1950
POD4-F	ATGGTACCGGAAAAGCAGACCC	Gh_A06G0929
POD4-R	CCATTTCCGCCTTCAGGGCATA	Gh_A06G0929
POD5-F	TTGTTACGATCCCTGCAACGCT	Gh_A05G2945
POD5-R	GCGAGGGAGAGATTGTCTTGAGC	Gh_A05G2945
Gbp-F	AGCTCGGATACGATTGATAACG	Gh_A10G0147
Gbp-R	GAAGACGAAGAACAAGGGGAAG	Gh_A10G0147
