# Supplementary material for: Fumonisin B1-Induced Changes in Cotton Fiber Elongation Revealed by Sphingolipidomics and Proteomics
Source: Biomolecules. 2020 Aug 31;10(9):1258. doi: 10.3390/biom10091258 (PMC7564794; doi:10.3390/biom10091258)
Supplement: Supplementary file 1 [file biomolecules-10-01258-s001.zip › Table S2.xlsx]

## Sheet: Sheet2
Major categories	Individual sphingolipid	Control-1	Control-2	Control-3	FB1-1	FB1-2	FB1-3	Average content of control(umol/g)	Average content of FB1(umol/g)	FB1/Control	p-value
LCB-1P	t18:1	4.81e-05	3.52e-05	5.31e-05	3.02e-05	3.11e-05	2.91e-05	4.54667e-05	3.01333e-05	0.662757	0.0229939
	t18:0	2.24e-05	1.91e-05	1.69e-05	0.00069281	0.000688381	0.000835339	1.94667e-05	0.000738843	37.9543	5.91334e-05
	d18:1	1.11e-06	1.21e-06	8.72e-07	3.61e-06	2.83e-06	3.26e-06	1.064e-06	3.23333e-06	3.03885	0.000462224
	d18:0	1.76e-06	2.21e-06	1.98e-06	0.000164319	0.000144508	0.000153864	1.98333e-06	0.00015423	77.7632	5.93536e-06
LCB	t18:1	0.000505403	0.000428978	0.000586481	0.00158018	0.00103644	0.000756673	0.000506954	0.00112443	2.21801	0.0330267
	t18:0	0.00184668	0.00152397	0.00203842	0.0105154	0.00813758	0.00727846	0.00180302	0.00864381	4.79406	0.00110621
	d18:1	2.26e-05	2.06e-05	2.62e-05	9.6e-05	0.000101766	8.14e-05	2.31333e-05	9.30553e-05	4.02256	0.000184943
Cer	d18:1/16:0	8.64e-06	5.62e-06	1e-05	2.03e-05	2.22e-05	2.06e-05	8.08667e-06	2.10333e-05	2.60099	0.000403952
	d18:1/18:0	3.84e-05	2.52e-05	3.65e-05	3.18e-05	3.36e-05	2.68e-05	3.33667e-05	3.07333e-05	0.921079	0.298624
	d18:1/20:1	2.83e-05	2.2e-05	3.06e-05	1.11e-05	1.15e-05	1.04e-05	2.69667e-05	1.1e-05	0.407911	0.00175887
	d18:1/20:0	2.14e-05	2.34e-05	2.51e-05	1.32e-05	1.46e-05	1.34e-05	2.33e-05	1.37333e-05	0.589413	0.000580231
	d18:1/22:1	4.61e-06	7.57e-06	8.36e-06	9.56e-06	8.52e-06	7.24e-06	6.84667e-06	8.44e-06	1.23272	0.147572
	d18:1/22:0	1.06e-05	1.16e-05	1.69e-05	1.85e-05	1.65e-05	1.4e-05	1.30333e-05	1.63333e-05	1.2532	0.116341
	d18:1/24:1	6.71e-06	7.17e-06	8.25e-06	1.41e-05	1.68e-05	1.24e-05	7.37667e-06	1.44333e-05	1.95662	0.00328283
	d18:1/24:0	2.22e-05	2.18e-05	2.59e-05	4.7e-05	4.95e-05	4.01e-05	2.33e-05	4.55333e-05	1.95422	0.00099951
	d18:1/26:1	5.21e-06	5.27e-06	6.44e-06	8.07e-06	9.64e-06	6.79e-06	5.64e-06	8.16667e-06	1.44799	0.0254869
	d18:1/26:0	8.88e-06	8.82e-06	9.83e-06	1.37e-05	1.87e-05	1.26e-05	9.17667e-06	1.5e-05	1.63458	0.0188972
	d18:0/16:0	2.95e-06	2.12e-06	2.12e-06	2.95e-05	2.95e-05	1.97e-05	2.39667e-06	2.62333e-05	10.9458	0.00095037
	d18:0/18:0	6.36e-06	3.56e-06	9.24e-06	4.11e-05	4.05e-05	2.81e-05	6.38667e-06	3.65667e-05	5.72547	0.00133272
	d18:0/20:0	5.26e-06	5.46e-06	6.96e-06	1.4e-05	1.07e-05	9.97e-06	5.89333e-06	1.15567e-05	1.96097	0.00688891
	d18:0/22:0	2.37e-06	3.18e-06	2.55e-06	2.22e-05	1.8e-05	1.08e-05	2.7e-06	1.7e-05	6.2963	0.00640156
	d18:0/24:1	1.14e-06	1.33e-06	1.04e-06	5.09e-06	4.83e-06	2.94e-06	1.17e-06	4.28667e-06	3.66382	0.00515221
	t18:1/16:0	2.27e-05	3.14e-05	2.77e-05	7.76e-05	6.37e-05	7.16e-05	2.72667e-05	7.09667e-05	2.60269	0.000387487
	t18:1/18:0	2.17e-05	2.29e-05	2.2e-05	3.95e-05	3.28e-05	3.71e-05	2.22e-05	3.64667e-05	1.64264	0.00100734
	t18:1/20:0	1.2e-05	9.88e-06	1.36e-05	8.63e-06	5.8e-06	5.55e-06	1.18267e-05	6.66e-06	0.563134	0.0120603
	t18:1/22:0	7.47e-05	0.000111906	0.000123911	4.18e-05	3.43e-05	3.29e-05	0.000103506	3.63333e-05	0.351027	0.00559074
	t18:1/22:1	2.19e-05	2.54e-05	2.33e-05	2.19e-05	3.1e-05	2.57e-05	2.35333e-05	2.62e-05	1.11331	0.199551
	t18:1/24:0	0.000225825	0.00027784	0.000325453	7.79e-05	8.03e-05	6.44e-05	0.000276373	7.42e-05	0.268478	0.00114081
	t18:1/24:1	3.5e-05	4.27e-05	4.05e-05	3.17e-05	3.26e-05	2.78e-05	3.94e-05	3.07e-05	0.779188	0.0165242
	t18:1/26:0	0.000109688	0.000115522	0.000149958	1.47e-05	2.12e-05	1.39e-05	0.000125056	1.66e-05	0.132741	0.000527769
	t18:1/28:0	6.71e-06	1.08e-05	1.13e-05	3.6e-06	3.11e-06	2.97e-06	9.60333e-06	3.22667e-06	0.335994	0.00608478
	t18:0/16:0	1.34e-05	1.56e-05	1.37e-05	0.000124254	0.000110752	0.000123092	1.42333e-05	0.000119366	8.38637	8.89061e-06
	t18:0/18:0	4.26e-05	4.64e-05	4.75e-05	0.000139956	0.000118589	0.000117497	4.55e-05	0.000125347	2.75489	0.000215895
	t18:0/20:0	2.93e-05	2.71e-05	3.94e-05	3.5e-05	3.29e-05	3.5e-05	3.19333e-05	3.43e-05	1.07411	0.286047
	t18:0/22:0	0.000197899	0.000247211	0.000329679	0.000269496	0.000244006	0.000227567	0.000258263	0.000247023	0.956478	0.397144
	t18:0/22:1	1.46e-05	1.49e-05	1.5e-05	1.95e-05	2.28e-05	1.9e-05	1.48333e-05	2.04333e-05	1.37753	0.00474541
	t18:0/24:0	0.000483221	0.000550704	0.000708554	0.000615279	0.000632309	0.000670667	0.000580826	0.000639418	1.10088	0.221045
	t18:0/24:1	3.29e-05	3.44e-05	3.74e-05	5.13e-05	5.36e-05	4.66e-05	3.49e-05	5.05e-05	1.44699	0.00155532
	t18:0/26:0	0.000139682	0.000149336	0.000182722	9.56e-05	8.49e-05	9.16e-05	0.000157247	9.07e-05	0.576801	0.00384366
hCer	t18:1/h16:0	6.29e-06	5.4e-06	4.54e-06	5.68e-06	7.14e-06	8.1e-06	5.41e-06	6.97333e-06	1.28897	0.0727012
	t18:1/h18:0	4.83e-05	5.53e-05	5.39e-05	6.18e-05	7.23e-05	5.28e-05	5.25e-05	6.23e-05	1.18667	0.0896333
	t18:1/h20:0	3.21e-05	3.72e-05	4.19e-05	3.41e-05	3.69e-05	3.02e-05	3.70667e-05	3.37333e-05	0.910072	0.193244
	t18:1/h21:0	0.00010588	0.00012724	0.000105563	0.00012085	0.000115263	0.000111994	0.000112894	0.000116036	1.02783	0.350741
	t18:1/h22:0	7.69e-05	0.00011201	0.000111005	0.000150298	0.000165115	0.000128421	9.99717e-05	0.000147945	1.47987	0.0189398
	t18:1/h23:0	3.27e-05	5.54e-05	5.84e-05	7.81e-05	7.49e-05	6.42e-05	4.88333e-05	7.24e-05	1.48259	0.0306876
	t18:1/h24:1	3.35e-05	5.17e-05	5.19e-05	1.66e-05	1.83e-05	1.69e-05	4.57e-05	1.72667e-05	0.377826	0.00485281
	t18:1/h24:0	0.000159135	0.000205217	0.000199299	0.000272094	0.000278876	0.000237139	0.000187884	0.000262703	1.39822	0.00911503
	t18:1/h25:0	3.9e-05	5.8e-05	5.66e-05	5.29e-05	5.98e-05	4.59e-05	5.12e-05	5.28667e-05	1.03255	0.415444
	t18:1/h26:1	5.75e-06	7.71e-06	7.64e-06	3.29e-06	4.32e-06	3.41e-06	7.03333e-06	3.67333e-06	0.522275	0.00476282
	t18:1/h26:0	0.000106096	9.93e-05	0.000121762	6.27e-05	6.19e-05	5.32e-05	0.000109053	5.92667e-05	0.543468	0.00121654
	t18:0/h22:1	6.83e-05	0.000113544	0.000154919	8.96e-05	0.000103498	9.81e-05	0.000112254	9.7066e-05	0.864697	0.290594
	t18:0/h22:0	7.63e-05	7.9e-05	0.000119272	0.000190679	0.00021194	0.00018871	9.1524e-05	0.00019711	2.15364	0.00129154
	t18:0/h23:0	5.02e-05	5.47e-05	7.34e-05	9.13e-05	0.000105184	9.67e-05	5.94333e-05	9.7728e-05	1.64433	0.00470264
	t18:0/h24:1	6.2e-05	9.81e-05	0.000116496	0.000105361	0.000105813	0.000125441	9.21987e-05	0.000112205	1.21699	0.156185
	t18:0/h24:0	0.000127581	0.000129698	0.00017348	0.000360078	0.000393028	0.00039297	0.000143586	0.000382025	2.6606	0.00010566
	t18:0/h26:1	5.19e-06	9.88e-06	8.83e-06	1.25e-05	1.47e-05	1.3e-05	7.96667e-06	1.34e-05	1.68201	0.012882
	t18:0/h26:0	4.57e-05	4.31e-05	4.5e-05	6.3e-05	7.68e-05	7.02e-05	4.46e-05	7e-05	1.56951	0.00166457
GluCer	d18:1/h16:0	1.91e-05	1.45e-05	2e-05	6.6e-06	6.33e-06	7.06e-06	1.78667e-05	6.66333e-06	0.372948	0.0014232
	d18:1/h18:0	9.33e-05	7.5e-05	9.73e-05	3.04e-05	2.95e-05	2.55e-05	8.85333e-05	2.84667e-05	0.321536	0.0005143
	d18:1/h19:0	4.5e-06	5.19e-06	5.85e-06	4.71e-06	4.04e-06	3.65e-06	5.18e-06	4.13333e-06	0.797941	0.0516525
	d18:1/h20:0	9.53e-05	8.05e-05	0.000101586	2.51e-05	2.47e-05	2.11e-05	9.2462e-05	2.36333e-05	0.2556	0.000209125
	d18:1/h22:0	6.6e-06	6.54e-06	7.82e-06	7.67e-06	1.5e-05	4.92e-06	6.98667e-06	9.19667e-06	1.31632	0.25356
	d18:1/h23:0	8.85e-07	8.69e-07	1.41e-06	2.99e-06	6.37e-06	2.28e-06	1.05467e-06	3.88e-06	3.67889	0.0454416
	d18:1/h24:1	1.29e-06	1.33e-06	1.79e-06	1.93e-06	4.67e-06	1.47e-06	1.47e-06	2.69e-06	1.82993	0.147148
	d18:1/h24:0	7.18e-06	6.71e-06	7.51e-06	1.32e-05	1.88e-05	5.73e-06	7.13333e-06	1.25767e-05	1.76308	0.112289
	t18:1/h18:0	6.29e-06	5.59e-06	8.7e-06	4.88e-06	4.64e-06	4.38e-06	6.86e-06	4.63333e-06	0.675413	0.0398349
	t18:1/h20:0	2.75e-05	2.02e-05	2.79e-05	1.16e-05	1.25e-05	1.16e-05	2.52e-05	1.19e-05	0.472222	0.00309228
	t18:1/h22:0	5.6e-05	6.04e-05	6.27e-05	3.96e-05	4.06e-05	3.49e-05	5.97e-05	3.83667e-05	0.642658	0.000633897
	t18:1/h23:0	1.15e-05	1.8e-05	1.66e-05	1.6e-05	1.48e-05	1.31e-05	1.53667e-05	1.46333e-05	0.952278	0.374926
	t18:1/h24:1	3.45e-06	3.55e-06	3.32e-06	2.5e-06	2.38e-06	1.6e-06	3.44e-06	2.16e-06	0.627907	0.00577539
	t18:1/h24:0	0.000123246	0.000112626	0.000136034	6.98e-05	6.69e-05	6.44e-05	0.000123969	6.70333e-05	0.540728	0.000602933
	t18:1/h25:1	2.23e-05	2.1e-05	2.61e-05	3.68e-06	3.94e-06	2.78e-06	2.31333e-05	3.46667e-06	0.149856	0.000116808
	t18:1/h25:0	2.08e-05	2.4e-05	2.63e-05	1.49e-05	1.46e-05	1.36e-05	2.37e-05	1.43667e-05	0.606188	0.00236727
	t18:1/h26:1	2.18e-06	1.6e-06	2.37e-06	8.07e-07	9.16e-07	1.15e-06	2.05e-06	9.57667e-07	0.467154	0.00621307
	t18:1/h26:0	9.03e-05	6.92e-05	8.86e-05	2.16e-05	1.98e-05	1.99e-05	8.27e-05	2.04333e-05	0.247078	0.000393225
	t18:1/h28:0	4.06e-06	5.35e-06	5.35e-06	1.98e-06	1.91e-06	1.97e-06	4.92e-06	1.95333e-06	0.397019	0.00116282
	t18:0/h18:0	3.07e-06	2.92e-06	3.61e-06	3.16e-06	2.79e-06	3.19e-06	3.2e-06	3.04667e-06	0.952083	0.283322
GIPC	t18:0/h16:0	1.42e-05	2e-05	1.17e-05	3.75e-06	3.87e-06	6.39e-06	1.53e-05	4.67e-06	0.305229	0.00754189
	t18:0/h18:0	1.97e-05	2.17e-05	1.94e-05	6.46e-06	9.17e-06	5.62e-06	2.02667e-05	7.08333e-06	0.349507	0.00025963
	t18:0/h20:0	9.47e-06	1.4e-05	9.17e-06	4.17e-07	4.48e-06	4.6e-06	1.088e-05	3.16567e-06	0.290962	0.0103559
	t18:0/h26:0	4.22e-05	2.93e-05	0.000115686	2.08e-07	3.26e-06	1.28e-06	6.23953e-05	1.58267e-06	0.0253651	0.0433841
	t18:1/h16:0	2.76e-06	1.36e-05	4.59e-06	1.67e-06	3.67e-06	7.67e-06	6.98333e-06	4.33667e-06	0.621002	0.261522
	t18:1/h18:0	3.95e-06	8.93e-06	4.59e-06	4.79e-06	1.2e-05	5.11e-06	5.82333e-06	7.3e-06	1.25358	0.314367
	t18:1/h20:0	1.03e-05	4.68e-06	1.83e-05	1.88e-06	4.68e-06	7.41e-06	1.10933e-05	4.65667e-06	0.419772	0.102748
	t18:1/h22:0	1.58e-06	3.4e-06	3.57e-06	4.17e-07	2.65e-06	7.67e-07	2.85e-06	1.278e-06	0.448421	0.0851544
	d18:0/h16:0	2.29e-05	2.76e-05	5.61e-06	3e-05	2.04e-05	9.71e-06	1.87033e-05	2.00367e-05	1.07129	0.444022
	d18:0/h18:0	1.86e-05	1.96e-05	9.17e-06	1.23e-05	1.04e-05	1.99e-05	1.579e-05	1.42e-05	0.899303	0.368384
	d18:0/h20:0	1.97e-06	5.95e-06	5.1e-07	1.88e-06	2.65e-06	6.39e-06	2.81e-06	3.64e-06	1.29537	0.358984
	d18:0/h20:1	9.08e-06	3.83e-06	8.66e-06	3.75e-06	5.91e-06	1.05e-05	7.19e-06	6.72e-06	0.934631	0.432855
	d18:0/h22:0	3e-05	2.98e-05	1.89e-05	4.38e-06	1.43e-06	7.67e-07	2.62333e-05	2.19233e-06	0.0835705	0.00164676
	d18:0/h22:1	7.38e-05	5.4e-05	3.52e-05	3.75e-06	4.68e-06	7.67e-07	5.43333e-05	3.06567e-06	0.0564233	0.00511163
	d18:0/h24:1	3.16e-06	7.65e-06	2.55e-06	2.08e-06	3.46e-06	1.53e-06	4.45333e-06	2.35667e-06	0.529192	0.143385
	d18:1/h16:0	2.37e-06	4.68e-06	3.06e-06	3.13e-06	2.04e-06	7.16e-06	3.37e-06	4.11e-06	1.21958	0.342987
	d18:1/h18:0	1.66e-05	1.87e-05	1.53e-05	6.25e-06	2.85e-06	6.13e-06	1.68667e-05	5.07667e-06	0.300988	0.000691143
	d18:1/h20:1	6.32e-06	1.32e-05	3.06e-06	4.58e-06	2.04e-06	2.56e-06	7.52667e-06	3.06e-06	0.406554	0.110761
