# Supplementary material for: Fumonisin B1-Induced Changes in Cotton Fiber Elongation Revealed by Sphingolipidomics and Proteomics
Source: Biomolecules. 2020 Aug 31;10(9):1258. doi: 10.3390/biom10091258 (PMC7564794; doi:10.3390/biom10091258)
Supplement: Supplementary file 1 [file biomolecules-10-01258-s001.zip › Table S3.xlsx]

## Sheet: Sheet1
Protein accession	Protein description	Gene name	MW [kDa]	Score	Coverage [%]	Peptides	PSMs	Unique peptides	Control-1	FB1-1	Control-2	FB1-2	Control-3	FB1-3	Control/FB1Ratio	Control/FB1 P value
A0A059Q7R0	WRKY transcription factor 18 OS=Gossypium hirsutum OX=3635 GN=WRKY18	WRKY18	56.439	1.0751	8.1	4	4	1
A0A068EXJ9	Endoglucanase OS=Gossypium hirsutum OX=3635 GN=LOC107912359	LOC107912359	56.885	16.82	15.9	6	7	6	0.772	1.369	0.83	1.373	0.716	1.204	1.702	0.00093971
A0A075C4Z3	Translationally controlled tumor protein OS=Gossypium hirsutum OX=3635 GN=TCTP1	TCTP1	19.145	-2	39.9	7	27	1
A0A075T4D3	Phosphoinositide phospholipase C OS=Gossypium hirsutum OX=3635 GN=PLC	PLC	66.254	81.061	31.1	23	37	19	1.406	0.653	1.255	0.744	1.166	0.664	0.539	0.00082077
A0A076FRP2	Polyphenol oxidase-3 OS=Gossypium hirsutum OX=3635 GN=PPO-3	PPO-3	71.53	48.677	23.9	14	23	7	1.172	0.782	1.117	0.781	1.32	0.76	0.644	0.00097533
A0A076JYC5	LIM domain-containing protein WLIM1-like OS=Gossypium hirsutum OX=3635 GN=LIM-8	LIM-8	21.183	24.398	38.1	8	15	6	1.087	0.91	1.025	0.924	1.103	0.896	0.849	0.002495
A0A0A7R535	Mitogen-activated protein kinase OS=Gossypium hirsutum OX=3635 GN=MPK6	MPK6	45.905	27.631	22.8	8	21	3	1.031	0.928	1.026	0.975	1.098	0.931	0.898	0.0167008
A0A0A7R545	Mitogen-activated protein kinase OS=Gossypium hirsutum OX=3635 GN=MPK12	MPK12	42.684	6.9366	26.7	9	13	6	1.036	0.944	0.93	0.988	1.038	1.06	0.996	0.94192
A0A0A7R547	Mitogen-activated protein kinase OS=Gossypium hirsutum OX=3635 GN=MPK18	MPK18	42.6	11.017	23	8	13	1	0.666	1.298	0.724	1.36	0.651	1.441	2.008	9.7306e-05
A0A0C5LA06	Mitogen-activated protein kinase OS=Gossypium hirsutum OX=3635 GN=MPK4	MPK4	42.379	11.816	26.3	9	13	1	1.29	0.713	1.089	0.83	1.172	0.856	0.676	0.0062844
A0A0G2QMX4	ATP synthase F1 subunit 8 OS=Gossypium hirsutum OX=3635 GN=atp8	atp8	17.615	28.1	27.3	4	7	4	0.925	1.002	1.03	1.008	1.009	1.052	1.033	0.41048
A0A0G2QMX7	ribosomal protein L2 OS=Gossypium hirsutum OX=3635 GN=rpl2	rpl2	37.338	4.1896	6.6	2	2	2
A0A0G2QMZ6	NADH-ubiquinone oxidoreductase chain 3 OS=Gossypium hirsutum OX=3635 GN=nad3	nad3	13.45	1.0732	12.7	1	1	1	0.775	0.879	1.105	1.331	0.955	0.972	1.122	0.53456
A0A0G2QS31	WRKY33 OS=Gossypium hirsutum OX=3635 GN=WRKY33	WRKY33	55.929	4.2054	5.9	3	3	1
A0A0N7IDX9	3-ketoacyl-CoA synthase OS=Gossypium hirsutum OX=3635 GN=KCS1	KCS1	59.974	5.7928	10.5	4	4	3
A0A0P0G659	3-ketoacyl-CoA synthase OS=Gossypium hirsutum OX=3635 GN=KCS38	KCS38	55.211	20.116	18.3	7	11	1	1.563	0.535	1.294	0.533	1.329	0.613	0.402	0.00026063
A0A0P0GG83	3-ketoacyl-CoA synthase OS=Gossypium hirsutum OX=3635 GN=KCS5	KCS5	55.928	17.851	17.3	8	12	2	1.252	0.765	1.234	0.679	1.243	0.747	0.588	0.0047001
A0A0U1WT38	Glutathione S-transferase OS=Gossypium hirsutum OX=3635 GN=LOC107891011	LOC107891011	26.916	195.41	52.3	11	32	3	0.633	1.438	0.74	1.306	0.601	1.452	2.126	0.00044031
A0A0U2KVS8	AOC3 OS=Gossypium hirsutum OX=3635 GN=AOC3	AOC3	27.103	55.116	24.8	5	11	1
A0A0U2L631	Ferritin OS=Gossypium hirsutum OX=3635 GN=FER2	FER2	28.136	18.693	31.6	6	11	5	1.334	0.611	1.332	0.673	1.39	0.533	0.448	0.00030324
A0A193CKI4	Pyruvate kinase OS=Gossypium hirsutum OX=3635 GN=LOC107927086	LOC107927086	55.034	191.11	39.9	16	40	5	1.01	1.002	0.975	1.002	0.989	1.035	1.022	0.22024
A0A1B1HY16	Farnesyl pyrophosphate synthase 2 OS=Gossypium hirsutum OX=3635 GN=FPS2	FPS2	39.545	5.0847	35.1	12	28	1	1.084	1.045	0.943	0.968	0.911	1.078	1.052	0.44406
A0A1U8HGI3	zinc finger BED domain-containing protein RICESLEEPER 1-like OS=Gossypium hirsutum OX=3635 GN=LOC107885945	LOC107885945	77.073	2.3717	3.4	2	2	2
A0A1U8HGK3	DNA-directed RNA polymerase subunit OS=Gossypium hirsutum OX=3635 GN=LOC107885964	LOC107885964	147.9	4.2408	1.3	1	1	1
A0A1U8HGM8	triosephosphate isomerase, cytosolic-like OS=Gossypium hirsutum OX=3635 GN=LOC107886002	LOC107886002	27.128	173.88	44.3	12	59	0
A0A1U8HGQ8	very-long-chain 3-oxoacyl-CoA reductase 1-like OS=Gossypium hirsutum OX=3635 GN=LOC107886000	LOC107886000	35.977	7.035	45.9	14	33	1	1.563	0.412	1.448	0.341	1.681	0.352	0.236	3.8695e-05
A0A1U8HGR5	mitochondrial import inner membrane translocase subunit TIM10-like OS=Gossypium hirsutum OX=3635 GN=LOC107886038	LOC107886038	9.666	13.409	25.9	2	3	2	0.617	1.27	1.009	1.225	1.033	0.885	1.271	0.28048
A0A1U8HGS2	Expansin OS=Gossypium hirsutum OX=3635 GN=LOC107885990	LOC107885990	28.097	2.1047	11.2	3	3	1	1.028	1.009	0.979	0.985	0.938	1.086	1.046	0.32178
A0A1U8HGZ7	peroxisome biogenesis protein 19-2-like OS=Gossypium hirsutum OX=3635 GN=LOC107886078	LOC107886078	27.743	36.066	15.9	4	6	2	1.068	0.938	1.049	0.96	1.086	0.913	0.878	0.00176301
A0A1U8HGZ9	Acyl-coenzyme A oxidase OS=Gossypium hirsutum OX=3635 GN=LOC107886061	LOC107886061	78.832	147.46	32.2	22	33	12	1.241	0.76	1.179	0.714	1.234	0.788	0.619	0.000135329
A0A1U8HH04	DWNN domain isoform 1 OS=Theobroma cacao OX=3641 GN=TCM_015936 PE=4 SV=1	LOC107886064	94.939	3.4622	4.8	3	3	2	1.192	0.773	1.198	0.76	1.096	0.934	0.708	0.008363
A0A1U8HH30	vesicle-associated protein 1-2-like OS=Gossypium hirsutum OX=3635 GN=LOC107886082	LOC107886082	26.144	32.115	46.6	9	14	4	1.079	0.976	0.97	1.063	0.95	0.975	1.005	0.912
A0A1U8HH53	Plasma membrane ATPase OS=Gossypium hirsutum OX=3635 GN=LOC107886121	LOC107886121	105.33	250.7	43	40	101	18	1.164	0.812	1.152	0.778	1.226	0.744	0.659	0.000196772
A0A1U8HH69	HVA22-like protein OS=Gossypium hirsutum OX=3635 GN=LOC107886130	LOC107886130	20.273	35.127	24.9	4	6	1	0.993	0.996	0.89	1.117	0.974	1.066	1.113	0.087302
A0A1U8HH87	adenine phosphoribosyltransferase 4 OS=Gossypium hirsutum OX=3635 GN=LOC107886096	LOC107886096	20.158	38.918	40.1	6	9	6	0.83	1.199	0.837	1.2	0.688	1.143	1.504	0.003358
A0A1U8HHB9	Programmed cell death 4 OS=Gossypium arboreum OX=29729 GN=F383_32946 PE=4 SV=1	LOC107886159	79.081	92.307	27.4	15	20	2	0.983	0.923	0.942	0.927	1.036	1.217	1.036	0.78896
A0A1U8HHC1	hypersensitive-induced response protein 1-like isoform X3 OS=Gossypium hirsutum OX=3635 GN=LOC107886124	LOC107886124	25.725	-2	33.8	8	12	1
A0A1U8HHC9	callose synthase 10-like OS=Gossypium hirsutum OX=3635 GN=LOC107886163	LOC107886163	217.95	155.63	15.6	29	43	5	1.165	0.921	1.093	0.789	1.124	0.876	0.765	0.0053568
A0A1U8HHE4	Glutathione peroxidase OS=Gossypium hirsutum OX=3635 GN=LOC107886161	LOC107886161	18.91	43.313	35.7	7	15	6	0.929	1.064	1.019	1.115	0.842	1.086	1.17	0.047757
A0A1U8HHI4	protein NBR1 homolog OS=Gossypium hirsutum OX=3635 GN=LOC107886212	LOC107886212	86.572	15.629	13.2	8	11	4	0.795	1.14	0.955	1.253	0.932	1.088	1.298	0.020878
A0A1U8HHI8	feruloyl CoA ortho-hydroxylase 1-like OS=Gossypium hirsutum OX=3635 GN=LOC107886197	LOC107886197	40.607	1.7934	2.7	1	1	1
A0A1U8HHI9	21 kDa protein-like OS=Gossypium hirsutum OX=3635 GN=LOC107886220	LOC107886220	21.377	18.113	33.2	5	8	5	0.508	1.506	0.542	1.352	0.484	1.741	2.998	0.00016399
A0A1U8HHL4	Chalcone-flavonone isomerase family protein OS=Gossypium hirsutum OX=3635 GN=LOC107886193	LOC107886193	24.413	93.574	52.4	11	36	3	1.282	0.689	1.373	0.619	1.339	0.563	0.468	0.00024379
A0A1U8HHL5	glutamate-1-semialdehyde 2,1-aminomutase 2, chloroplastic-like isoform X2 OS=Gossypium hirsutum OX=3635 GN=LOC107886228	LOC107886228	50.038	3.7998	24.5	8	13	0
A0A1U8HHL8	F-box/LRR-repeat protein At5g63520-like OS=Gossypium hirsutum OX=3635 GN=LOC107886239	LOC107886239	57.729	1.1824	3.4	2	2	2
A0A1U8HHN8	DNA-directed RNA polymerases II and IV subunit 5A-like OS=Gossypium hirsutum OX=3635 GN=LOC107886254	LOC107886254	24.059	45.35	32.7	6	9	6	1.048	0.947	1.093	0.962	1.006	0.912	0.896	0.0191373
A0A1U8HHQ1	glutamate-1-semialdehyde 2,1-aminomutase 2, chloroplastic-like isoform X1 OS=Gossypium hirsutum OX=3635 GN=LOC107886228	LOC107886228	50.421	-2	23.6	8	13	1
A0A1U8HHU6	nucleobase-ascorbate transporter 6-like OS=Gossypium hirsutum OX=3635 GN=LOC107886256	LOC107886256	57.663	1.7311	8.9	4	7	2
A0A1U8HHV6	mediator of RNA polymerase II transcription subunit 23-like isoform X2 OS=Gossypium hirsutum OX=3635 GN=LOC107886275	LOC107886275	179.87	12.451	4.3	6	6	6	1.125	0.938	1.091	0.972	1.015	0.839	0.851	0.039099
A0A1U8HHW6	Hydroxyproline-rich glycoprotein family protein, putative isoform 2 OS=Theobroma cacao OX=3641 GN=TCM_011235 PE=4 SV=1	LOC107886306	73.544	13.367	6.9	5	5	5	0.903	1.245	0.805	1.085	0.863	1.175	1.363	0.0040041
A0A1U8HHZ7	protein transport protein Sec24-like At3g07100 OS=Gossypium hirsutum OX=3635 GN=LOC107886331	LOC107886331	113.24	7.4145	13.7	12	20	3	0.928	1.116	1.037	1.053	0.832	1.07	1.158	0.084502
A0A1U8HI02	THO complex subunit 2-like OS=Gossypium hirsutum OX=3635 GN=LOC107886334	LOC107886334	209.3	44.391	7.5	13	14	13	1.09	0.897	1.121	0.908	1.046	0.93	0.84	0.00155701
A0A1U8HI50	vacuolar fusion protein CCZ1 homolog isoform X2 OS=Gossypium hirsutum OX=3635 GN=LOC107886338	LOC107886338	57.321	20.731	18.5	9	11	2	1.1	0.89	1.057	0.948	1.06	0.93	0.86	0.0026772
A0A1U8HI61	Efr3b OS=Gossypium arboreum OX=29729 GN=F383_05118 PE=4 SV=1	LOC107886341	112.4	7.472	7.1	6	6	6	1.026	1.031	1.145	0.892	0.969	0.928	0.908	0.21544
A0A1U8HIB4	haloacid dehalogenase-like hydrolase domain-containing protein Sgpp isoform X5 OS=Gossypium hirsutum OX=3635 GN=LOC107886386	LOC107886386	22.803	5.3252	12.7	2	2	1	1.088	0.851	1.225	0.785	1.275	0.706	0.653	0.004058
A0A1U8HIE0	serine/threonine-protein kinase SAPK3-like OS=Gossypium hirsutum OX=3635 GN=LOC107886411	LOC107886411	38.453	2.4466	16.4	6	10	1	1.325	0.685	1.268	0.75	1.185	0.698	0.565	0.000179655
A0A1U8HIE2	regulator of nonsense transcripts 1 homolog OS=Gossypium hirsutum OX=3635 GN=LOC107886389	LOC107886389	138.74	72.493	16.1	16	18	5	1.066	0.913	1.036	0.973	1.009	1.003	0.929	0.079802
A0A1U8HIE4	High molecular mass early light-inducible HV58, chloroplastic OS=Gossypium arboreum OX=29729 GN=F383_00461 PE=4 SV=1	LOC107886415	27.897	13.851	12.7	2	2	2
A0A1U8HIG4	stress-associated endoplasmic reticulum protein 2-like OS=Gossypium hirsutum OX=3635 GN=LOC107886431	LOC107886431	7.4757	1.6727	13.2	1	1	1
A0A1U8HII5	shaggy-related protein kinase alpha OS=Gossypium hirsutum OX=3635 GN=LOC107886451	LOC107886451	46.203	3.5919	10.8	5	5	2
A0A1U8HII9	multiple organellar RNA editing factor 8, chloroplastic/mitochondrial-like OS=Gossypium hirsutum OX=3635 GN=LOC107886449	LOC107886449	45.89	13.133	18.1	7	21	1	1.07	0.892	1.116	0.861	1.245	0.77	0.735	0.008298
A0A1U8HIJ4	probable pre-mRNA-splicing factor ATP-dependent RNA helicase DEAH4 isoform X2 OS=Gossypium hirsutum OX=3635 GN=LOC107886452	LOC107886452	63.369	6.9964	8.7	4	4	4	0.975	0.943	0.968	1.048	0.914	1.105	1.084	0.197298
A0A1U8HIK2	mitochondrial import receptor subunit TOM20-like OS=Gossypium hirsutum OX=3635 GN=LOC107886464	LOC107886464	21.896	90.257	50.2	10	15	7	1.004	1.031	1.038	0.995	0.955	0.974	1.001	0.96656
A0A1U8HIN2	Protein kish OS=Gossypium hirsutum OX=3635 GN=LOC107886457	LOC107886457	7.9745	2.7096	14.3	1	2	1	0.949	1.05	1.049	1.142	0.972	0.844	1.022	0.88256
A0A1U8HIN7	REF/SRPP-like protein At1g67360 OS=Gossypium hirsutum OX=3635 GN=LOC107886462	LOC107886462	25.31	47.477	48.1	10	14	3	0.984	1.064	1.142	0.868	1.085	0.834	0.861	0.153817
A0A1U8HIR1	probable thimet oligopeptidase OS=Gossypium hirsutum OX=3635 GN=LOC107886507	LOC107886507	79.816	3.3963	3.4	2	2	2	0.966	1.1	1.043	1.039	0.879	0.996	1.086	0.21756
A0A1U8HIR6	Serine/threonine protein phosphatase 2A regulatory subunit OS=Gossypium hirsutum OX=3635 GN=LOC107886506	LOC107886506	60.061	4.7644	13.4	8	10	3	0.928	0.999	1.034	1.079	0.873	1.12	1.128	0.111515
A0A1U8HIS5	Glyceraldehyde-3-phosphate dehydrogenase OS=Gossypium hirsutum OX=3635 GN=LOC107886513	LOC107886513	37.194	226.94	73.7	22	123	1	0.408	1.731	0.336	1.374	0.389	1.983	4.491	0.00025757
A0A1U8HIV0	Alpha-galactosidase OS=Gossypium hirsutum OX=3635 GN=LOC107886530	LOC107886530	71.797	27.863	13	10	12	3	0.846	0.906	0.968	0.788	1.504	0.967	0.802	0.35334
A0A1U8HIW7	protein DETOXIFICATION 29-like OS=Gossypium hirsutum OX=3635 GN=LOC107886539	LOC107886539	44.457	1.5045	4.2	2	2	2
A0A1U8HJ28	probable nucleoredoxin 1 OS=Gossypium hirsutum OX=3635 GN=LOC107886589	LOC107886589	63.907	242.36	56.7	28	72	9	0.744	1.208	0.643	1.436	0.734	1.283	1.851	0.00086166
A0A1U8HJ39	cell polarity protein mor2-like isoform X1 OS=Gossypium hirsutum OX=3635 GN=LOC107886588 PE=4 SV=1	LOC107886588	238.42	32.415	8.6	18	20	18	1.035	0.945	1.051	0.974	1.017	1.031	0.951	0.13378
A0A1U8HJD6	IST1 homolog OS=Gossypium hirsutum OX=3635 GN=LOC107886646	LOC107886646	35.244	0.91791	26.2	7	8	1
A0A1U8HJG8	RNA-binding protein 25-like isoform X2 OS=Gossypium hirsutum OX=3635 GN=LOC107886664	LOC107886664	87.82	74.337	13.6	10	12	4	1.091	1.067	1.048	0.858	0.992	0.942	0.916	0.25564
A0A1U8HJI9	GDSL esterase/lipase At5g45920-like isoform X1 OS=Gossypium hirsutum OX=3635 GN=LOC107886684	LOC107886684	26.872	2.8046	26.1	5	6	2	1.484	0.576	1.496	0.417	1.342	0.524	0.351	0.00049722
A0A1U8HJK9	Pyruvate dehydrogenase E1 component subunit beta OS=Gossypium hirsutum OX=3635 GN=LOC107886698	LOC107886698	38.66	68.851	30.9	10	37	1	1.012	0.931	1.06	1.053	0.986	0.959	0.962	0.40994
A0A1U8HJR7	(R,S)-reticuline 7-O-methyltransferase-like OS=Gossypium hirsutum OX=3635 GN=LOC107886757	LOC107886757	42.271	56.357	20.1	7	9	4	0.573	1.504	0.57	1.364	0.491	1.7	2.796	0.00022366
A0A1U8HJS7	protein STABILIZED1-like isoform X1 OS=Gossypium hirsutum OX=3635 GN=LOC107886763	LOC107886763	115.38	57.205	21.8	24	28	24	1.048	0.991	1.024	0.996	0.949	1.007	0.991	0.81432
A0A1U8HJV7	putative RNA polymerase II subunit B1 CTD phosphatase RPAP2 homolog OS=Gossypium hirsutum OX=3635 GN=LOC107886784	LOC107886784	76.105	7.271	8.6	6	6	4	1.098	0.943	1.019	0.988	1.048	0.895	0.893	0.034041
A0A1U8HJY7	Serine/threonine protein phosphatase 2A regulatory subunit OS=Gossypium hirsutum OX=3635 GN=LOC107886802	LOC107886802	56.907	1.1168	1.8	1	1	1
A0A1U8HK17	Alanine--tRNA ligase OS=Gossypium hirsutum OX=3635 GN=LOC107886828	LOC107886828	111.1	42.417	37.3	37	73	4	0.979	1.005	0.927	1.099	0.928	1.045	1.111	0.029064
A0A1U8HK48	Protein arginine methyltransferase NDUFAF7 OS=Gossypium hirsutum OX=3635 GN=LOC107886854	LOC107886854	53.045	7.8912	9.2	3	4	3	0.934	0.96	1.054	1.004	0.955	1.055	1.026	0.60066
A0A1U8HK51	protein CLP1 homolog OS=Gossypium hirsutum OX=3635 GN=LOC107886853	LOC107886853	41.769	71.793	12.9	4	6	4	1.02	0.978	1.041	0.971	1.012	0.969	0.95	0.0043213
A0A1U8HK66	mitochondrial import receptor subunit TOM40-1-like OS=Gossypium hirsutum OX=3635 GN=LOC107886867	LOC107886867	34.536	50.981	22.9	6	11	1	0.907	1.131	0.934	0.934	1.034	1.095	1.099	0.26314
A0A1U8HK74	46 kDa FK506-binding nuclear protein-like OS=Gossypium hirsutum OX=3635 GN=LOC107886868	LOC107886868	23.876	10.399	5.6	1	1	1	0.829	1.233	0.781	1.333	0.906	0.989	1.413	0.026699
A0A1U8HK87	myosin-1-like isoform X2 OS=Gossypium hirsutum OX=3635 GN=LOC107886881	LOC107886881	119.46	7.0209	3.5	4	4	4	1.22	0.75	1.144	0.76	1.228	0.838	0.654	0.00051786
A0A1U8HK93	lysine-specific demethylase JMJ25-like OS=Gossypium hirsutum OX=3635 GN=LOC107886889	LOC107886889	107.59	15.425	10.1	7	8	6	1.051	0.9	1.002	0.986	0.993	1.079	0.973	0.62304
A0A1U8HKA4	Alanine--tRNA ligase OS=Gossypium hirsutum OX=3635 GN=LOC107886901	LOC107886901	111.35	235.08	38.3	38	75	5	0.996	1.024	0.922	1.068	0.938	1.096	1.116	0.022902
A0A1U8HKB0	peroxisome biogenesis protein 22-like OS=Gossypium hirsutum OX=3635 GN=LOC107886907	LOC107886907	30.864	30.012	29.4	7	10	1	0.993	1.019	1.007	0.986	1.074	0.923	0.953	0.26538
A0A1U8HKD2	Pyruvate kinase OS=Gossypium hirsutum OX=3635 GN=LOC107886925	LOC107886925	54.954	264.06	38.8	19	48	2	0.81	1.239	0.811	1.079	0.794	1.364	1.525	0.02582
A0A1U8HKG2	universal stress protein A-like protein OS=Gossypium hirsutum OX=3635 GN=LOC107886946	LOC107886946	18.722	6.1285	27.7	5	11	1	0.369	1.75	0.357	1.742	0.385	1.659	4.636	3.2005e-07
A0A1U8HKK4	putative polyol transporter 2 OS=Gossypium hirsutum OX=3635 GN=LOC107886982	LOC107886982	58.287	5.1182	2	1	1	1	0.519	1.508	0.518	1.515	0.495	1.656	3.054	2.6212e-06
A0A1U8HKL4	proline-rich extensin-like protein EPR1 OS=Gossypium hirsutum OX=3635 GN=LOC107886988	LOC107886988	47.133	38.722	22.1	8	16	2	1.153	0.832	1.159	0.913	1.153	0.695	0.704	0.046824
A0A1U8HKM7	HVA22-like protein OS=Gossypium hirsutum OX=3635 GN=LOC107886998	LOC107886998	44.679	1.724	2.5	1	1	1
A0A1U8HKR0	serpin-ZX-like OS=Gossypium hirsutum OX=3635 GN=LOC107887018	LOC107887018	42.703	113.52	59.5	20	46	9	0.826	1.21	0.845	1.102	0.823	1.241	1.425	0.00068024
A0A1U8HKS6	prostaglandin E synthase 2-like OS=Gossypium hirsutum OX=3635 GN=LOC107887034	LOC107887034	36.802	31.971	17.1	6	8	5	0.948	1.129	0.915	1.138	0.855	1.064	1.226	0.005283
A0A1U8HKT7	H/ACA ribonucleoprotein complex subunit 2-like protein OS=Gossypium hirsutum OX=3635 GN=LOC107887052	LOC107887052	17.349	2.4509	6.4	1	1	1	1.058	1.015	1.07	0.959	1.052	0.832	0.882	0.162637
A0A1U8HKU0	COP9 signalosome complex subunit 4 OS=Gossypium hirsutum OX=3635 GN=LOC107887054	LOC107887054	45.276	2.1156	14.6	7	10	1	0.869	1.05	0.983	1.024	0.966	1.146	1.143	0.060203
A0A1U8HKU6	G patch domain-containing protein TGH-like isoform X2 OS=Gossypium hirsutum OX=3635 GN=LOC107887061	LOC107887061	97.045	5.6147	4.1	3	4	3	0.907	1.025	1.149	1.112	0.974	0.809	0.972	0.80018
A0A1U8HKZ4	ATP synthase subunit gamma OS=Gossypium hirsutum OX=3635 GN=LOC107887098	LOC107887098	35.812	-2	32.5	11	34	1
A0A1U8HKZ7	Histone deacetylase OS=Gossypium hirsutum OX=3635 GN=LOC107887099	LOC107887099	73.499	3.3424	2.3	1	1	1
A0A1U8HL03	Mitochondrial glycoprotein family protein, putative OS=Theobroma cacao OX=3641 GN=TCM_014229 PE=4 SV=1	LOC107887103	25.517	17.895	23.2	5	8	2
A0A1U8HL27	maf-like protein DDB_G0281937 OS=Gossypium hirsutum OX=3635 GN=LOC107887122	LOC107887122	22.536	51.311	36.9	6	11	5	0.981	1.039	0.985	1.016	1.059	0.922	0.984	0.72528
A0A1U8HL35	AT5G58210 protein OS=Arabidopsis thaliana OX=3702 GN=MCK7.8 PE=2 SV=1	LOC107887128	37.203	17.595	18.6	5	6	5	1.255	0.85	1.208	0.72	1.228	0.671	0.607	0.0192623
A0A1U8HL76	ABC transporter G family member 11-like OS=Gossypium hirsutum OX=3635 GN=LOC107887162	LOC107887162	78.534	23.68	10.2	7	12	5	1.586	0.437	1.4	0.439	1.543	0.414	0.285	3.8332e-06
A0A1U8HL87	protein FAR-RED ELONGATED HYPOCOTYL 3-like OS=Gossypium hirsutum OX=3635 GN=LOC107887164	LOC107887164	96.071	1.036	2.3	2	2	2
A0A1U8HL97	30S ribosomal protein 3, chloroplastic-like OS=Gossypium hirsutum OX=3635 GN=LOC107887169	LOC107887169	18.375	1.2832	4.9	1	1	1
A0A1U8HLA3	Ketose-bisphosphate aldolase class-II family protein isoform 1 OS=Theobroma cacao OX=3641 GN=TCM_012876 PE=4 SV=1	LOC107887181	147.87	236.18	35.8	44	69	14	0.841	1.176	0.842	1.126	0.803	1.274	1.438	0.00077739
A0A1U8HLB5	probable inactive receptor kinase At1g48480 OS=Gossypium hirsutum OX=3635 GN=LOC107887191	LOC107887191	70.569	3.9277	22.3	13	17	1	0.856	1.053	0.895	1.175	0.868	1.218	1.316	0.0039629
A0A1U8HLC7	Glutathione reductase OS=Gossypium hirsutum OX=3635 GN=LOC107887195	LOC107887195	53.842	25.543	34.9	13	29	2	0.864	1.127	0.9	1.11	0.935	1.084	1.23	0.00122334
A0A1U8HLE9	DNA-directed RNA polymerase subunit beta OS=Gossypium arboreum OX=29729 GN=F383_21906 PE=4 SV=1	LOC107887214	30.568	2.9785	4.4	1	1	1
A0A1U8HLG3	ATPase LOC107887225 OS=Gossypium hirsutum OX=3635 GN=LOC107887225	LOC107887225	39.977	6.6562	7.1	3	5	3	0.962	0.964	0.957	1.044	0.966	1.097	1.076	0.196343
A0A1U8HLH3	Protein transport protein SEC23 OS=Gossypium hirsutum OX=3635 GN=LOC107887232	LOC107887232	85.107	7.6828	12	8	11	2	0.968	1.003	0.945	1.061	1.033	1.012	1.044	0.2424
A0A1U8HLJ6	mitochondrial outer membrane protein porin of 36 kDa OS=Gossypium hirsutum OX=3635 GN=LOC107887240	LOC107887240	29.656	10.699	26.4	9	18	0
A0A1U8HLK2	ectonucleotide pyrophosphatase/phosphodiesterase family member 1-like OS=Gossypium hirsutum OX=3635 GN=LOC107887253	LOC107887253	54.411	3.8879	11.2	4	5	1	0.799	1.229	0.795	1.164	0.757	1.359	1.596	0.00065963
A0A1U8HLL4	tetraspanin-2-like OS=Gossypium hirsutum OX=3635 GN=LOC107887257	LOC107887257	29.821	0.92358	4.1	1	1	1
A0A1U8HLM1	2-isopropylmalate synthase 2, chloroplastic-like OS=Gossypium hirsutum OX=3635 GN=LOC107887273	LOC107887273	67.315	192.14	32.4	18	34	10	1.021	0.978	1.002	1.008	0.985	1.029	1.002	0.90822
A0A1U8HLM7	30S ribosomal S5 OS=Gossypium arboreum OX=29729 GN=F383_27574 PE=4 SV=1	LOC107887277	102.8	1.653	1.7	1	1	1
A0A1U8HLN7	Protein-L-isoaspartate O-methyltransferase OS=Gossypium hirsutum OX=3635 GN=LOC107887285	LOC107887285	24.459	5.453	21.7	5	8	1
A0A1U8HLS9	malignant T-cell-amplified sequence 1 homolog OS=Gossypium hirsutum OX=3635 GN=LOC107887316	LOC107887316	20.091	105.64	38.1	6	11	6	1.114	1.006	0.996	0.943	1.037	0.937	0.917	0.096962
A0A1U8HLT3	Reticulon-like protein OS=Gossypium hirsutum OX=3635 GN=LOC107887329	LOC107887329	28.298	11.592	19.8	7	16	1	0.898	1.031	0.917	1.078	1.032	1.079	1.12	0.066399
A0A1U8HLU3	RNA-binding protein 38 isoform X2 OS=Gossypium hirsutum OX=3635 GN=LOC107887337	LOC107887337	27.705	8.7853	9.2	2	2	2
A0A1U8HM31	probable 6-phosphogluconolactonase 1 OS=Gossypium hirsutum OX=3635 GN=LOC107887395	LOC107887395	29.248	67.456	29.3	7	8	2	1.082	0.902	1.164	0.889	1.077	0.853	0.796	0.0016431
A0A1U8HM54	Trigger factor OS=Gossypium arboreum OX=29729 GN=F383_09428 PE=4 SV=1	LOC107887405	29.903	32.423	24.8	6	9	6	1.021	0.965	1.036	0.949	1.015	0.987	0.944	0.0112784
A0A1U8HM66	Aconitate hydratase OS=Gossypium hirsutum OX=3635 GN=LOC107887413	LOC107887413	98.186	1.5132	28.5	26	66	2	1.036	0.902	1.049	1.029	0.972	1.017	0.964	0.48052
A0A1U8HM97	dicarboxylate transporter 2.1, chloroplastic-like OS=Gossypium hirsutum OX=3635 GN=LOC107887433	LOC107887433	59.948	11.599	9.8	4	5	4	0.904	1.094	0.948	1.023	1.006	1.078	1.118	0.038962
A0A1U8HMA6	14-3-3 protein 6-like OS=Gossypium hirsutum OX=3635 GN=LOC107887435	LOC107887435	29.262	196.3	70.9	18	77	1	1.031	0.979	1.002	0.979	1.001	1.019	0.981	0.31228
A0A1U8HMC4	copper-transporting ATPase PAA1, chloroplastic-like isoform X2 OS=Gossypium hirsutum OX=3635 GN=LOC107887448	LOC107887448	94.168	14.256	7.9	6	7	1	0.971	1.02	1.039	0.929	0.974	1.084	1.016	0.78232
A0A1U8HMD4	Sulfate/thiosulfate import ATP-binding protein cysA, putative OS=Theobroma cacao OX=3641 GN=TCM_002725 PE=4 SV=1	LOC107887449	33.727	-2	2.4	1	1	1	0.933	1.184	0.843	1.138	0.953	0.999	1.217	0.037642
A0A1U8HMF3	syntaxin-132-like OS=Gossypium hirsutum OX=3635 GN=LOC107887473	LOC107887473	34.163	3.7176	8.3	2	2	2
A0A1U8HMH0	THO complex subunit 4A-like OS=Gossypium hirsutum OX=3635 GN=LOC107885929	LOC107885929	25.8	69.488	49	12	21	2	1.072	0.927	1.15	0.912	1.065	0.844	0.816	0.0058646
A0A1U8HML1	trifunctional UDP-glucose 4,6-dehydratase/UDP-4-keto-6-deoxy-D-glucose 3,5-epimerase/UDP-4-keto-L-rhamnose-reductase RHM1-like OS=Gossypium hirsutum OX=3635 GN=LOC107885961	LOC107885961	75.323	38.561	30.1	17	29	8	0.839	1.222	0.843	1.139	0.826	1.212	1.425	0.00010266
A0A1U8HML5	BTB/POZ domain-containing protein At5g60050-like isoform X1 OS=Gossypium hirsutum OX=3635 GN=LOC107885965	LOC107885965	57.67	1.4566	2	1	1	1	1.316	0.824	1.205	0.615	1.252	0.705	0.568	0.002925
A0A1U8HMN6	histone-lysine N-methyltransferase 2D-like OS=Gossypium hirsutum OX=3635 GN=LOC107887564	LOC107887564	144.49	77.186	8.1	9	12	2
A0A1U8HMP2	G2484-1 protein, putative isoform 5 OS=Theobroma cacao OX=3641 GN=TCM_015949 PE=4 SV=1	LOC107887568	222.47	8.8024	15.4	28	32	2	0.967	1.049	0.928	0.996	0.973	1.123	1.105	0.059665
A0A1U8HMR8	mitochondrial import inner membrane translocase subunit TIM9-like isoform X1 OS=Gossypium hirsutum OX=3635 GN=LOC107886009	LOC107886009	10.803	21.695	58.1	5	7	3	0.864	1.098	0.998	1.064	1.031	0.955	1.077	0.33294
A0A1U8HMT1	universal stress protein A-like protein OS=Gossypium hirsutum OX=3635 GN=LOC107886022	LOC107886022	17.646	92.961	69.2	11	22	2	1.089	0.962	1.096	0.931	1.12	0.734	0.795	0.1099
A0A1U8HMZ9	DNA topoisomerase 4 subunit B OS=Gossypium arboreum OX=29729 GN=F383_00044 PE=4 SV=1	LOC107886063	30.577	7.3836	13.9	3	5	3	0.979	1.084	1.034	0.986	0.911	1.048	1.066	0.23142
A0A1U8HN51	photosystem II stability/assembly factor HCF136, chloroplastic-like OS=Gossypium hirsutum OX=3635 GN=LOC107887758	LOC107887758	19.772	1.3112	7.3	1	1	1
A0A1U8HN70	MAP3K epsilon protein kinase 1-like OS=Gossypium hirsutum OX=3635 GN=LOC107887759	LOC107887759	157.29	2.7339	6.2	7	7	1	1.299	0.873	1.139	0.861	1.063	0.713	0.699	0.015056
A0A1U8HN76	GDSL esterase/lipase At1g54790-like isoform X2 OS=Gossypium hirsutum OX=3635 GN=LOC107887753	LOC107887753	41.502	5.2796	6.6	2	2	2	1.242	0.798	1.272	0.814	1.049	0.76	0.666	0.0032354
A0A1U8HNC1	UDP-glycosyltransferase 89B2-like OS=Gossypium hirsutum OX=3635 GN=LOC107887828	LOC107887828	51.662	65.675	28	10	13	6	0.811	1.232	0.756	1.074	0.813	1.405	1.559	0.0056615
A0A1U8HNC3	protein DCL, chloroplastic-like OS=Gossypium hirsutum OX=3635 GN=LOC107886142	LOC107886142	24.809	9.8137	14.3	4	4	4	0.861	1.145	0.905	1.219	0.899	1.025	1.272	0.010919
A0A1U8HNJ7	sodium/hydrogen exchanger 8-like OS=Gossypium hirsutum OX=3635 GN=LOC107887894	LOC107887894	125.97	24.534	2.6	3	4	3	0.982	0.924	0.987	0.893	1.01	1.117	0.985	0.80154
A0A1U8HNJ8	protein KTI12 homolog OS=Gossypium hirsutum OX=3635 GN=LOC107887914	LOC107887914	21.263	2.5482	27	3	3	3
A0A1U8HNK4	actin-depolymerizing factor 4-like OS=Gossypium hirsutum OX=3635 GN=LOC107886198	LOC107886198	15.981	74.338	45.3	4	17	3	0.981	1.04	0.978	1.025	0.951	1.069	1.077	0.0093758
A0A1U8HNM0	probable glycerol-3-phosphate acyltransferase 8 OS=Gossypium hirsutum OX=3635 GN=LOC107887939	LOC107887939	46.672	14.692	26.7	11	21	4	1.108	1.062	1.043	0.953	0.986	0.887	0.925	0.27066
A0A1U8HNM9	omega-hydroxypalmitate O-feruloyl transferase-like OS=Gossypium hirsutum OX=3635 GN=LOC107886227	LOC107886227	47.837	1.1532	4.2	2	2	1
A0A1U8HNW8	1-aminocyclopropane-1-carboxylate oxidase homolog 4-like OS=Gossypium hirsutum OX=3635 GN=LOC107886276	LOC107886276	40.079	16.25	23.4	7	7	7	0.954	1.01	0.958	1.113	0.993	1.058	1.095	0.042921
A0A1U8HNX6	MLP-like protein 31 OS=Gossypium hirsutum OX=3635 GN=LOC107886287	LOC107886287	17.686	23.335	66.9	10	46	1	0.934	1.108	1.008	1.08	1.029	0.9	1.039	0.6487
A0A1U8HNY3	transcription factor MYB32-like OS=Gossypium hirsutum OX=3635 GN=LOC107888113	LOC107888113	37.839	1.0109	2.3	1	1	1	1.251	0.749	1.245	0.818	1.191	0.664	0.605	0.00126159
A0A1U8HNZ3	Alpha-galactosidase OS=Gossypium hirsutum OX=3635 GN=LOC107888128	LOC107888128	37.409	19.142	13.8	4	5	1	0.975	1.033	0.984	1.134	0.805	1.112	1.186	0.071037
A0A1U8HP82	protein HASTY 1-like OS=Gossypium hirsutum OX=3635 GN=LOC107888290	LOC107888290	133.56	2.5994	7.9	8	12	1	1.159	0.808	1.154	0.883	1.112	0.842	0.74	0.00046368
A0A1U8HPA4	nuclear pore complex protein NUP160-like isoform X2 OS=Gossypium hirsutum OX=3635 GN=LOC107886374	LOC107886374	167.39	65.139	8.8	12	15	6	1.212	0.895	1.112	0.784	1.099	0.861	0.742	0.0039224
A0A1U8HPA6	40S ribosomal protein S27 OS=Gossypium hirsutum OX=3635 GN=LOC107888311	LOC107888311	9.6141	9.4044	44.2	3	18	1	0.891	1.065	0.993	1.158	0.925	1.016	1.153	0.046177
A0A1U8HPC7	Lon protease homolog 2, peroxisomal OS=Gossypium hirsutum OX=3635 GN=LOC107886394	LOC107886394	98.224	13.247	7.4	5	5	1	1.107	1.011	0.928	0.942	1.036	0.987	0.957	0.49692
A0A1U8HPD2	Proteasome subunit beta OS=Gossypium hirsutum OX=3635 GN=LOC107886397	LOC107886397	27.68	196.92	42.4	8	23	0
A0A1U8HPD9	peroxisomal adenine nucleotide carrier 1-like OS=Gossypium hirsutum OX=3635 GN=LOC107888310	LOC107888310	35.314	2.6726	3.4	1	1	1	1.063	1.007	0.962	0.974	0.96	1.055	1.017	0.68956
A0A1U8HPF6	pyrrolidone-carboxylate peptidase-like OS=Gossypium hirsutum OX=3635 GN=LOC107888354	LOC107888354	23.778	11.528	29.4	6	7	6	1.051	0.93	1.067	0.934	1.045	0.98	0.899	0.0039982
A0A1U8HPG8	LOW QUALITY PROTEIN: DExH-box ATP-dependent RNA helicase DExH10-like OS=Gossypium hirsutum OX=3635 GN=LOC107888367	LOC107888367	103.04	19.374	14.1	14	18	2	1.148	0.817	1.046	0.965	1.019	0.996	0.865	0.106796
A0A1U8HPH4	nuclear transport factor 2-like isoform X3 OS=Gossypium hirsutum OX=3635 GN=LOC107886428	LOC107886428	10.656	29.307	54.1	4	14	1	0.938	0.923	1.08	1.073	1.107	0.868	0.916	0.33762
A0A1U8HPI1	Pectin acetylesterase OS=Gossypium hirsutum OX=3635 GN=LOC107888364	LOC107888364	46.298	19.282	15.5	6	9	1
A0A1U8HPJ0	At4g31080 OS=Arabidopsis thaliana OX=3702 GN=At4g31080 PE=1 SV=1	LOC107888371	43.961	8.4712	14.6	6	7	6	1.091	0.979	1.132	0.805	0.944	1.043	0.893	0.29018
A0A1U8HPL9	Octicosapeptide/Phox/Bem1p (PB1) domain-containing protein / tetratricopeptide repeat (TPR)-containing protein OS=Theobroma cacao OX=3641 GN=TCM_036959 PE=4 SV=1	LOC107888404	81.942	12.491	10.1	6	6	5	1.497	0.551	1.284	0.495	1.401	0.659	0.408	0.00067691
A0A1U8HPM5	pumilio homolog 2-like OS=Gossypium hirsutum OX=3635 GN=LOC107885972	LOC107885972	114.4	9.9083	9.3	10	14	3	1.03	1.008	1.091	0.936	0.994	0.936	0.925	0.099698
A0A1U8HPN1	serine/arginine-rich splicing factor RSZ22-like OS=Gossypium hirsutum OX=3635 GN=LOC107888382	LOC107888382	20.975	6.9057	30.6	5	12	1
A0A1U8HPP3	Pectate lyase OS=Gossypium hirsutum OX=3635 GN=LOC107886482	LOC107886482	44.578	3.0295	3.5	1	1	1	0.346	1.92	0.421	1.788	0.307	1.474	4.825	0.00020112
A0A1U8HPR0	leucine aminopeptidase 1-like OS=Gossypium hirsutum OX=3635 GN=LOC107888423	LOC107888423	54.467	225.56	51.1	20	54	4	1.14	0.864	1.111	0.844	1.15	0.812	0.741	0.000137787
A0A1U8HPR7	Disease resistance protein OS=Theobroma cacao OX=3641 GN=TCM_017362 PE=4 SV=1	LOC107888448	56.525	34.277	16.9	6	7	1	1.328	0.637	1	0.861	1.319	0.796	0.629	0.023482
A0A1U8HPS8	Binding protein, putative isoform 1 OS=Theobroma cacao OX=3641 GN=TCM_001638 PE=4 SV=1	LOC107886510	60.736	1.3709	1.7	1	1	1	1.079	0.912	1.015	0.952	1.052	0.988	0.907	0.027942
A0A1U8HPU8	acyltransferase-like protein At3g26840, chloroplastic OS=Gossypium hirsutum OX=3635 GN=LOC107888440	LOC107888440	79.296	6.5701	2.7	2	2	2	1.488	0.703	1.138	0.607	1.192	0.794	0.551	0.0063244
A0A1U8HPU9	universal stress protein YxiE-like OS=Gossypium hirsutum OX=3635 GN=LOC107886024	LOC107886024	18.2	124.01	48.8	10	19	8	0.962	0.955	0.993	1.066	1.028	0.956	0.998	0.9456
A0A1U8HPX1	MuDR family transposase isoform 2 OS=Theobroma cacao OX=3641 GN=TCM_026838 PE=4 SV=1	LOC107886532	87.503	62.22	20.8	15	15	14	1.174	0.81	1.136	0.929	1.053	0.838	0.766	0.0069647
A0A1U8HPZ7	Protein DETOXIFICATION OS=Gossypium hirsutum OX=3635 GN=LOC107888471	LOC107888471	53.709	1.7533	7.4	4	6	2	1.107	0.964	1.044	0.896	1.128	0.839	0.823	0.0134826
A0A1U8HQ64	Putative kinetochore ndc80 OS=Gossypium arboreum OX=29729 GN=F383_05107 PE=4 SV=1	LOC107888517	19.555	12.951	18.1	3	4	3	1.059	1.065	1.022	0.989	0.978	0.89	0.962	0.51634
A0A1U8HQ67	BnaA08g28530D protein OS=Brassica napus OX=3708 GN=BnaA08g28530D PE=4 SV=1	LOC107888523	42.999	1.5523	3.7	1	1	1
A0A1U8HQ68	probable alpha,alpha-trehalose-phosphate synthase [UDP-forming] 9 OS=Gossypium hirsutum OX=3635 GN=LOC107886610	LOC107886610	97.09	13.192	6.7	5	6	3	0.984	0.928	1.02	0.983	1.018	1.081	0.99	0.8097
A0A1U8HQ73	spermidine synthase 1 OS=Gossypium hirsutum OX=3635 GN=LOC107886614	LOC107886614	37.923	30.715	25.9	7	14	7	1.012	0.99	0.996	0.994	1.019	1.013	0.99	0.36626
A0A1U8HQ74	inactive TPR repeat-containing thioredoxin TTL3-like OS=Gossypium hirsutum OX=3635 GN=LOC107888526	LOC107888526	73.5	6.5186	5.9	3	3	3	0.945	1.083	0.972	1.105	0.854	1.083	1.18	0.0137165
A0A1U8HQ80	Ubiquitin carboxyl-terminal hydrolase-related protein isoform 1 OS=Theobroma cacao OX=3641 GN=TCM_013775 PE=4 SV=1	LOC107886117	177.89	3.6913	1.9	3	3	1	1.025	1.027	0.959	1.028	0.899	1.095	1.093	0.108041
A0A1U8HQ81	chaperone protein ClpB3, chloroplastic OS=Gossypium hirsutum OX=3635 GN=LOC107888555	LOC107888555	110.54	114.02	25.3	24	30	7	1.077	0.935	1.078	0.972	1.04	0.881	0.873	0.0114419
A0A1U8HQ85	BAG family molecular chaperone regulator 8, chloroplastic OS=Gossypium hirsutum OX=3635 GN=LOC107888551	LOC107888551	48.116	21.423	16.9	6	7	6	0.918	1.067	1.072	0.968	0.957	1.061	1.051	0.41862
A0A1U8HQ86	ras GTPase-activating protein-binding protein 2-like OS=Gossypium hirsutum OX=3635 GN=LOC107888533	LOC107888533	49.703	2.9849	28.6	11	24	1	0.961	1.003	1.093	0.993	1.02	0.929	0.952	0.33172
A0A1U8HQ88	CCR4-NOT transcription complex subunit 3-like isoform X2 OS=Gossypium hirsutum OX=3635 GN=LOC107888554	LOC107888554	97.357	19.046	10.1	8	10	3	0.956	1.078	0.909	1.066	0.947	1.086	1.149	0.00106248
A0A1U8HQ92	delta-1-pyrroline-5-carboxylate dehydrogenase 12A1, mitochondrial-like OS=Gossypium hirsutum OX=3635 GN=LOC107886127	LOC107886127	54.942	3.1794	36.5	15	46	2	1.145	0.879	1.133	0.877	1.05	0.886	0.794	0.0139422
A0A1U8HQB2	KH domain-containing protein At4g18375-like isoform X3 OS=Gossypium hirsutum OX=3635 GN=LOC107888579	LOC107888579	57.508	1.8736	19.1	9	11	0
A0A1U8HQB4	vignain-like OS=Gossypium hirsutum OX=3635 GN=LOC107886152	LOC107886152	40.12	226.28	40.7	13	38	6	1.492	0.493	1.431	0.489	1.446	0.474	0.333	1.8583e-07
A0A1U8HQB7	probable Ufm1-specific protease isoform X2 OS=Gossypium hirsutum OX=3635 GN=LOC107886156	LOC107886156	71.643	10.444	9.9	5	5	5	1.025	0.903	1.033	1.013	1.036	0.992	0.94	0.21678
A0A1U8HQD7	DExH-box ATP-dependent RNA helicase DExH18, mitochondrial-like OS=Gossypium hirsutum OX=3635 GN=LOC107888603	LOC107888603	87.69	2.7502	2.5	2	2	2	0.949	1.002	1.148	0.902	0.984	1.014	0.947	0.49218
A0A1U8HQG3	polypyrimidine tract-binding protein homolog 1-like isoform X3 OS=Gossypium hirsutum OX=3635 GN=LOC107888583	LOC107888583	47.156	12.914	18.7	6	6	6	0.958	0.967	0.965	1.013	0.967	1.08	1.059	0.22304
A0A1U8HQG4	SAL1 phosphatase-like OS=Gossypium hirsutum OX=3635 GN=LOC107888629	LOC107888629	35.358	6.3252	16.9	5	10	0
A0A1U8HQH7	ras-related protein RABE1c-like OS=Gossypium hirsutum OX=3635 GN=LOC107886195	LOC107886195	23.635	52.494	47.7	14	28	3	1.122	0.83	1.056	0.916	1.142	0.9	0.797	0.0041237
A0A1U8HQI6	actin-like OS=Gossypium hirsutum OX=3635 GN=LOC107886203	LOC107886203	41.777	5.4787	41.9	12	55	1
A0A1U8HQJ6	SUMO-activating enzyme subunit 1B-1-like OS=Gossypium hirsutum OX=3635 GN=LOC107886222	LOC107886222	36.229	22.126	24.5	6	10	4	1	0.968	0.972	1.064	0.913	1.113	1.09	0.157481
A0A1U8HQM0	ADP-ribosylation factor GTPase-activating protein AGD3-like OS=Gossypium hirsutum OX=3635 GN=LOC107886724	LOC107886724	92.818	14.279	8.1	6	6	1	1.281	0.809	1.406	0.645	1.106	0.654	0.556	0.0043775
A0A1U8HQN4	Glutamate dehydrogenase OS=Gossypium hirsutum OX=3635 GN=LOC107886252	LOC107886252	44.833	134.08	42.1	16	40	3	1.019	1.074	0.902	1.063	0.908	1.091	1.141	0.029623
A0A1U8HQP1	probable RNA helicase SDE3 OS=Gossypium hirsutum OX=3635 GN=LOC107888690	LOC107888690	97.46	22.221	13.2	10	11	2	1.002	0.958	1.032	1.053	1.016	0.942	0.968	0.40166
A0A1U8HQP6	Glyceraldehyde-3-phosphate dehydrogenase OS=Gossypium hirsutum OX=3635 GN=LOC107888701	LOC107888701	36.544	32.794	65.2	22	105	0
A0A1U8HQR0	(R,S)-reticuline 7-O-methyltransferase-like OS=Gossypium hirsutum OX=3635 GN=LOC107886758	LOC107886758	39.659	1.4902	9.6	3	3	1
A0A1U8HQR4	polyribonucleotide nucleotidyltransferase 2, mitochondrial-like OS=Gossypium hirsutum OX=3635 GN=LOC107888666	LOC107888666	107.23	1.7517	9.3	8	9	1	1.027	0.872	1.055	0.959	1.12	0.954	0.87	0.025223
A0A1U8HQS3	Delta-1-pyrroline-5-carboxylate synthase OS=Gossypium hirsutum OX=3635 GN=LOC107888722	LOC107888722	78.223	10.314	17.7	11	19	3	0.675	1.312	0.65	1.347	0.747	1.408	1.963	0.000124435
A0A1U8HQS7	callose synthase 12-like OS=Gossypium hirsutum OX=3635 GN=LOC107886774	LOC107886774	206.35	54.178	10.7	16	21	9	0.914	0.987	1.022	1.031	1.009	1.116	1.064	0.28498
A0A1U8HQT1	ubiquitin-conjugating enzyme E2 variant 1A-like OS=Gossypium hirsutum OX=3635 GN=LOC107886278	LOC107886278	18.013	1.0965	26.4	4	5	0
A0A1U8HQT2	protein TPLATE-like OS=Gossypium hirsutum OX=3635 GN=LOC107888729	LOC107888729	129.06	159.24	28.7	30	41	4	0.99	0.995	0.91	1.056	0.923	1.213	1.156	0.090917
A0A1U8HQT9	aldo-keto reductase family 4 member C9-like isoform X2 OS=Gossypium hirsutum OX=3635 GN=LOC107888723	LOC107888723	33.433	1.3277	5.4	2	3	1
A0A1U8HQU9	[Protein-PII] uridylyltransferase OS=Gossypium arboreum OX=29729 GN=F383_25736 PE=4 SV=1	LOC107888740	93.556	4.0272	4.1	4	4	4
A0A1U8HQW0	cleavage and polyadenylation specificity factor subunit 1-like OS=Gossypium hirsutum OX=3635 GN=LOC107888746	LOC107888746	159.83	62.317	12.9	14	15	14	1.039	0.931	1.035	0.942	1.028	1.036	0.938	0.194185
A0A1U8HQZ3	aldo-keto reductase family 4 member C9-like OS=Gossypium hirsutum OX=3635 GN=LOC107888724	LOC107888724	35.212	46.348	36.5	13	24	2	0.923	1.154	0.953	1.111	0.955	0.935	1.13	0.145464
A0A1U8HR33	guanine deaminase-like OS=Gossypium hirsutum OX=3635 GN=LOC107888756	LOC107888756	20.218	30.639	31.7	5	9	5	0.761	1.268	0.77	1.211	0.75	1.254	1.637	3.1647e-06
A0A1U8HR44	histidine biosynthesis bifunctional protein hisIE, chloroplastic-like isoform X1 OS=Gossypium hirsutum OX=3635 GN=LOC107888797	LOC107888797	32.415	14.744	19.1	5	6	2	0.921	1.052	0.968	1.097	1.025	0.959	1.067	0.2734
A0A1U8HR53	Thioredoxin OS=Gossypium hirsutum OX=3635 GN=LOC107886857	LOC107886857	14.885	5.406	15.7	2	3	1	1.077	1.046	1.053	0.948	0.925	0.957	0.966	0.58814
A0A1U8HR95	probable receptor-like protein kinase At5g47070 OS=Gossypium hirsutum OX=3635 GN=LOC107886400	LOC107886400	43.814	34.404	19.3	8	10	2	0.834	1.166	0.874	1.11	0.897	1.184	1.328	0.00059949
A0A1U8HRA6	DNA-damage-repair/toleration protein DRT102-like OS=Gossypium hirsutum OX=3635 GN=LOC107888802	LOC107888802	33.49	33.496	59.7	14	38	3	0.98	0.956	0.978	0.969	1.074	0.989	0.961	0.29708
A0A1U8HRB8	Peptidyl-prolyl cis-trans isomerase-like 3 OS=Gossypium arboreum OX=29729 GN=F383_10966 PE=4 SV=1	LOC107886413	37.962	19.019	8.5	3	4	3	0.929	1.1	0.897	1.038	0.916	1.172	1.207	0.0068599
A0A1U8HRC2	expansin-like B1 OS=Gossypium hirsutum OX=3635 GN=LOC107886417	LOC107886417	27.361	1.4016	7.6	2	2	2
A0A1U8HRC4	ultraviolet-B receptor UVR8-like OS=Gossypium hirsutum OX=3635 GN=LOC107888823	LOC107888823	47.532	197.37	66.6	25	59	1	1.034	0.991	0.996	1.016	0.993	0.981	0.988	0.5253
A0A1U8HRC7	electron transfer flavoprotein subunit beta, mitochondrial OS=Gossypium hirsutum OX=3635 GN=LOC107888863	LOC107888863	27.387	73.349	50.6	12	19	4	0.941	1.118	1.032	1.02	0.938	1.002	1.079	0.17716
A0A1U8HRD9	putative clathrin assembly protein At2g01600 isoform X1 OS=Gossypium hirsutum OX=3635 GN=LOC107886434	LOC107886434	62.024	38.934	27.2	13	20	4	0.933	0.999	0.972	1.127	0.917	1.08	1.136	0.0322
A0A1U8HRF2	regulation of nuclear pre-mRNA domain-containing protein 1B-like isoform X1 OS=Gossypium hirsutum OX=3635 GN=LOC107888840	LOC107888840	57.216	5.621	5.6	3	3	3	1.162	0.985	1.168	0.727	0.98	0.953	0.805	0.118375
A0A1U8HRF9	probable E3 ubiquitin-protein ligase LUL4 isoform X2 OS=Gossypium hirsutum OX=3635 GN=LOC107888883	LOC107888883	41.753	3.0015	4.8	2	2	2
A0A1U8HRG1	vacuolar-sorting receptor 3-like OS=Gossypium hirsutum OX=3635 GN=LOC107886944	LOC107886944	69.925	157.29	29.4	17	26	7	0.802	1.229	0.803	1.165	0.81	1.299	1.529	0.0055048
A0A1U8HRG2	Lipoxygenase OS=Gossypium hirsutum OX=3635 GN=LOC107886453	LOC107886453	103.46	21.022	13	11	12	2	1.212	0.746	1.125	0.813	1.281	0.759	0.641	0.00063772
A0A1U8HRG5	protein CASP-like OS=Gossypium hirsutum OX=3635 GN=LOC107888846	LOC107888846	79.004	58.358	20.1	13	15	1
A0A1U8HRH5	sulfite oxidase isoform X2 OS=Gossypium hirsutum OX=3635 GN=LOC107888858	LOC107888858	41	68.818	33.9	11	13	1
A0A1U8HRI6	long chain acyl-CoA synthetase 6, peroxisomal-like OS=Gossypium hirsutum OX=3635 GN=LOC107888868	LOC107888868	78.925	47.591	15.7	8	11	1
A0A1U8HRI9	actin-depolymerizing factor OS=Gossypium hirsutum OX=3635 GN=LOC107888903	LOC107888903	16.557	11.574	14.7	1	1	1
A0A1U8HRJ5	ATP-citrate synthase alpha chain protein 3-like OS=Gossypium hirsutum OX=3635 GN=LOC107886475	LOC107886475	46.634	45.696	24.3	8	18	2	1.16	0.813	1.139	0.825	1.24	0.854	0.704	0.00029697
A0A1U8HRM1	putative ion channel POLLUX-like 2 isoform X3 OS=Gossypium hirsutum OX=3635 GN=LOC107888891	LOC107888891	86.776	1.3074	1.2	1	1	1
A0A1U8HRM9	topless-related protein 2-like OS=Gossypium hirsutum OX=3635 GN=LOC107888933	LOC107888933	124	122.77	22	21	29	9	1.058	0.95	1.055	0.998	0.971	0.955	0.941	0.13606
A0A1U8HRN0	cullin-1-like OS=Gossypium hirsutum OX=3635 GN=LOC107888927	LOC107888927	86.238	31.215	27.9	21	26	6	1.049	0.971	0.974	1.006	0.995	1.043	1.001	0.98202
A0A1U8HRN7	60S ribosomal protein L14-2-like OS=Gossypium hirsutum OX=3635 GN=LOC107888900	LOC107888900	15.521	1.3418	47	7	15	1
A0A1U8HRN8	Guanosine nucleotide diphosphate dissociation inhibitor OS=Gossypium hirsutum OX=3635 GN=LOC107887007	LOC107887007	49.638	22.486	24.5	9	19	3	1.18	0.849	1.103	0.825	1.079	0.934	0.776	0.0052774
A0A1U8HRQ7	eukaryotic translation initiation factor 4B2-like OS=Gossypium hirsutum OX=3635 GN=LOC107886527	LOC107886527	58.207	32.153	35.3	18	25	4	1.029	0.944	1.072	0.981	1.032	0.855	0.887	0.048159
A0A1U8HRQ8	bifunctional 3-dehydroquinate dehydratase/shikimate dehydrogenase, chloroplastic-like OS=Gossypium hirsutum OX=3635 GN=LOC107888918	LOC107888918	58.236	130.17	34.3	18	36	6	0.963	0.958	0.994	1.025	0.954	1.033	1.036	0.26388
A0A1U8HRS5	enhancer of mRNA-decapping protein 4-like OS=Gossypium hirsutum OX=3635 GN=LOC107888970	LOC107888970	147.35	177.81	17.8	21	28	5	1.006	0.995	1.06	0.974	0.948	1.027	0.994	0.8916
A0A1U8HRT1	enolase 1, chloroplastic-like OS=Gossypium hirsutum OX=3635 GN=LOC107887050	LOC107887050	52.174	20.896	38.9	16	48	2
A0A1U8HRT5	Transcriptional adapter OS=Gossypium hirsutum OX=3635 GN=LOC107888982	LOC107888982	61.854	35.343	17.8	8	9	7	1.19	0.897	1.152	0.863	1.045	0.856	0.772	0.0034976
A0A1U8HRV3	Eukaryotic translation initiation factor 4B OS=Gossypium arboreum OX=29729 GN=F383_08944 PE=4 SV=1	LOC107888987	69.135	3.0633	4.8	3	3	3	1.053	0.943	1.017	0.975	1.071	0.937	0.909	0.0082227
A0A1U8HRW4	polygalacturonase 1 beta-like protein 3 OS=Gossypium hirsutum OX=3635 GN=LOC107886579	LOC107886579	69.403	1.6426	1.3	1	1	1	1.015	1.227	1.084	0.911	1	0.754	0.933	0.5703
A0A1U8HRW5	peptide-N(4)-(N-acetyl-beta- glucosaminyl)asparagine amidase-like OS=Gossypium hirsutum OX=3635 GN=LOC107888997	LOC107888997	82.627	8.3884	4.8	3	4	2	1.12	0.829	0.991	0.828	1.233	0.98	0.789	0.04864
A0A1U8HRZ9	neurofilament medium polypeptide-like OS=Gossypium hirsutum OX=3635 GN=LOC107886600	LOC107886600	16.452	6.8683	24	3	3	3	0.939	1.071	1.01	0.974	1.066	0.95	0.993	0.90398
A0A1U8HS03	Tetratricopeptide repeat-like superfamily protein, putative isoform 1 OS=Theobroma cacao OX=3641 GN=TCM_021008 PE=4 SV=1	LOC107886606	59.201	3.5513	4.6	2	2	2
A0A1U8HS06	glucose-induced degradation protein 8 homolog isoform X1 OS=Gossypium hirsutum OX=3635 GN=LOC107888996	LOC107888996	27.804	21.902	25.1	4	7	1	1.106	0.907	1.125	0.869	1.137	0.819	0.77	0.0010385
A0A1U8HS13	AB hydrolase superfamily protein YfhM-like OS=Gossypium hirsutum OX=3635 GN=LOC107889001	LOC107889001	35.356	3.1795	28.6	9	17	1
A0A1U8HS21	KH domain-containing protein At4g18375-like isoform X3 OS=Gossypium hirsutum OX=3635 GN=LOC107889039	LOC107889039	63.066	22.641	25.8	12	14	1
A0A1U8HS26	protein RETICULATA-RELATED 1, chloroplastic-like isoform X2 OS=Gossypium hirsutum OX=3635 GN=LOC107889042	LOC107889042	39.637	3.2384	10.7	4	4	3
A0A1U8HS30	Putative serine/threonine-protein kinase dyrk2 OS=Gossypium arboreum OX=29729 GN=F383_23626 PE=4 SV=1	LOC107887130	132.79	3.1205	3.1	4	5	1	1.236	0.858	1.264	0.688	1.126	0.758	0.635	0.0033439
A0A1U8HS50	ubiquitin receptor RAD23b-like OS=Gossypium hirsutum OX=3635 GN=LOC107889033	LOC107889033	39.923	13.325	30	9	13	1	1.122	1.044	1.004	0.847	0.971	1.019	0.94	0.46028
A0A1U8HS54	Peptidyl-prolyl cis-trans isomerase OS=Gossypium hirsutum OX=3635 GN=LOC107889059	LOC107889059	22.289	18.096	40.6	8	23	1	1.137	0.871	1.22	0.825	1.18	0.702	0.678	0.0044577
A0A1U8HS58	Beta-lactamase-like protein 2 OS=Gossypium arboreum OX=29729 GN=F383_18140 PE=4 SV=1	LOC107886651	54.392	18.347	10.8	5	9	5	1.115	0.883	1.025	0.936	1.048	0.968	0.874	0.021697
A0A1U8HS59	perakine reductase-like OS=Gossypium hirsutum OX=3635 GN=LOC107889038	LOC107889038	38.832	26.268	44	15	33	3	0.407	1.599	0.453	1.518	0.544	1.738	3.458	0.000181278
A0A1U8HS60	perakine reductase-like OS=Gossypium hirsutum OX=3635 GN=LOC107889061	LOC107889061	38.62	65.982	50.3	19	40	2	1.152	0.81	1.108	0.848	1.198	0.839	0.722	0.00025574
A0A1U8HS75	Protein neuralized OS=Gossypium arboreum OX=29729 GN=F383_18850 PE=4 SV=1	LOC107889083	70.487	-2	1.8	1	1	1	1.203	1.001	0.989	0.883	0.907	1.026	0.939	0.57698
A0A1U8HS97	eukaryotic initiation factor 4A-8-like OS=Gossypium hirsutum OX=3635 GN=LOC107889092	LOC107889092	46.888	7.3214	47.5	22	89	2	1.006	1.039	0.926	1.041	1.074	0.927	1	0.99066
A0A1U8HSA3	Protein ROOT HAIR DEFECTIVE 3 homolog OS=Gossypium hirsutum OX=3635 GN=LOC107889095	LOC107889095	89.053	3.9593	7.6	6	7	1
A0A1U8HSA6	probable pre-mRNA-splicing factor ATP-dependent RNA helicase DEAH9 isoform X2 OS=Gossypium hirsutum OX=3635 GN=LOC107886692	LOC107886692	77.918	4.2028	4.4	3	3	3	1.046	0.944	1.024	0.989	1.024	0.976	0.94	0.0165211
A0A1U8HSC0	Acyl-coenzyme A thioesterase 13 OS=Gossypium arboreum OX=29729 GN=F383_25036 PE=4 SV=1	LOC107889116	16.666	1.835	9.8	2	2	2	0.9	1.208	1.006	0.967	0.891	1.065	1.158	0.127464
A0A1U8HSC6	E3 ubiquitin-protein ligase PRT1-like isoform X2 OS=Gossypium hirsutum OX=3635 GN=LOC107887198	LOC107887198	46.314	6.4377	8.3	3	3	1	1.07	0.943	1.049	0.824	1.167	0.927	0.82	0.020456
A0A1U8HSC7	4-sulfomuconolactone hydrolase-like OS=Gossypium hirsutum OX=3635 GN=LOC107886718	LOC107886718	37.649	19.243	30.6	9	11	9	1.094	0.911	1.077	0.897	1.112	0.865	0.814	0.00032427
A0A1U8HSE4	Ubiquitin thioesterase OS=Gossypium hirsutum OX=3635 GN=LOC107886728	LOC107886728	34.163	28.059	9.6	3	4	3	1.096	0.905	1.091	0.872	1.099	0.914	0.819	0.0052004
A0A1U8HSF8	methyl-CpG-binding domain-containing protein 11-like OS=Gossypium hirsutum OX=3635 GN=LOC107889142	LOC107889142	31.663	5.0472	25.9	5	12	2
A0A1U8HSG4	hydroxyphenylpyruvate reductase-like OS=Gossypium hirsutum OX=3635 GN=LOC107889117	LOC107889117	33.988	14.734	8.3	2	2	2	0.926	1.096	0.9	1.116	0.948	1.057	1.178	0.00170067
A0A1U8HSM5	elongation factor 1-beta 2-like OS=Gossypium hirsutum OX=3635 GN=LOC107889155	LOC107889155	24.093	34.439	59.9	12	46	2	1.033	1.003	1.044	0.938	1.061	0.917	0.911	0.0283
A0A1U8HSN6	Nicalin OS=Gossypium hirsutum OX=3635 GN=LOC107889187	LOC107889187	62.346	59.606	26.7	13	19	8	1.078	0.959	1.041	0.973	1.015	0.96	0.923	0.0114049
A0A1U8HSQ8	coiled-coil domain-containing protein R3HCC1L-like isoform X2 OS=Gossypium hirsutum OX=3635 GN=LOC107889218	LOC107889218	31.466	12.972	6.8	2	3	1
A0A1U8HSR1	116 kDa U5 small nuclear ribonucleoprotein component-like OS=Gossypium hirsutum OX=3635 GN=LOC107889174	LOC107889174	110.55	59.869	21	19	23	6	0.86	1.061	0.989	1.076	0.93	1.126	1.174	0.021615
A0A1U8HSS0	indole-3-acetic acid-amido synthetase GH3.6-like OS=Gossypium hirsutum OX=3635 GN=LOC107886821	LOC107886821	69.033	31.985	7.8	4	4	4	1.406	0.615	1.319	0.671	1.134	0.69	0.512	0.00077994
A0A1U8HSS2	dnaJ protein homolog OS=Gossypium hirsutum OX=3635 GN=LOC107889230	LOC107889230	46.275	55.451	38.8	18	51	0
A0A1U8HSV5	peroxisome biogenesis protein 22-like isoform X1 OS=Gossypium hirsutum OX=3635 GN=LOC107886852	LOC107886852	30.963	3.4426	29.4	7	10	1	1.015	0.907	1.045	0.953	1.004	1.083	0.961	0.47202
A0A1U8HSW0	Proteasome subunit alpha type OS=Gossypium hirsutum OX=3635 GN=LOC107889260	LOC107889260	27.385	144.88	62.2	14	33	1	1.031	1.047	0.968	1.048	0.93	0.999	1.056	0.177345
A0A1U8HSW1	GTPase LSG1-2-like OS=Gossypium hirsutum OX=3635 GN=LOC107889227	LOC107889227	66.978	0.91066	8	5	5	1
A0A1U8HSW4	Aldose 1-epimerase OS=Gossypium hirsutum OX=3635 GN=LOC107886858	LOC107886858	39.487	18.418	16.7	5	10	2	0.939	1.195	0.934	1.033	0.844	1.107	1.227	0.0199961
A0A1U8HSW6	protein STRICTOSIDINE SYNTHASE-LIKE 3-like OS=Gossypium hirsutum OX=3635 GN=LOC107889232	LOC107889232	43.921	256.56	60.4	18	47	4	1.269	0.698	1.231	0.705	1.304	0.638	0.537	6.2111e-05
A0A1U8HSX0	NADH-cytochrome b5 reductase OS=Gossypium hirsutum OX=3635 GN=LOC107889240	LOC107889240	31.262	7.5425	20.5	6	8	3	0.849	1.203	0.862	1.094	0.851	1.215	1.371	0.0113431
A0A1U8HSX6	60S ribosomal protein L7-4-like OS=Gossypium hirsutum OX=3635 GN=LOC107889272	LOC107889272	28.332	160.88	47.3	15	57	1	0.956	0.972	0.978	1.032	0.962	1.13	1.082	0.22394
A0A1U8HSZ4	isovaleryl-CoA dehydrogenase, mitochondrial-like OS=Gossypium hirsutum OX=3635 GN=LOC107889251	LOC107889251	44.66	-2	33.6	11	24	1
A0A1U8HT00	vacuolar-processing enzyme-like OS=Gossypium hirsutum OX=3635 GN=LOC107889295	LOC107889295	52.172	2.8215	2.3	1	1	1	1.058	0.652	1.303	0.631	1.573	0.672	0.497	0.027363
A0A1U8HT24	exosome complex component RRP45B-like isoform X4 OS=Gossypium hirsutum OX=3635 GN=LOC107889314	LOC107889314	28.098	0.9217	3.5	1	1	1
A0A1U8HT33	geranylgeranyl transferase type-2 subunit beta-like isoform X2 OS=Gossypium hirsutum OX=3635 GN=LOC107886914	LOC107886914	33.787	21.324	12.7	4	7	4	1.004	1.024	0.954	1.013	0.971	1.038	1.05	0.042022
A0A1U8HT35	Cysteine proteinase inhibitor OS=Gossypium hirsutum OX=3635 GN=LOC107889285	LOC107889285	11.396	1.6024	58.3	7	12	1	0.193	1.715	0.301	1.994	0.319	1.774	6.744	0.00030316
A0A1U8HT40	40S ribosomal protein S2-4-like OS=Gossypium hirsutum OX=3635 GN=LOC107889330	LOC107889330	29.552	13.399	49.3	16	38	0
A0A1U8HT42	NEDD8-activating enzyme E1 regulatory subunit OS=Gossypium hirsutum OX=3635 GN=LOC107887411	LOC107887411	58.214	66.681	23.3	10	15	2	1.041	0.985	1.061	0.897	1.055	0.955	0.899	0.0186369
A0A1U8HT44	calcium-dependent protein kinase 7-like OS=Gossypium hirsutum OX=3635 GN=LOC107889332	LOC107889332	59.856	57.356	19.8	9	12	1
A0A1U8HT71	ran-binding protein 10-like OS=Gossypium hirsutum OX=3635 GN=LOC107889350	LOC107889350	52.288	6.3676	8.4	4	4	2	1.095	0.927	1.09	0.93	1.027	0.916	0.863	0.0022802
A0A1U8HT92	protein-tyrosine-phosphatase PTP1-like isoform X3 OS=Gossypium hirsutum OX=3635 GN=LOC107889363	LOC107889363	39.75	12.269	19.7	7	10	3	1.098	0.795	1.031	1.028	1.041	1	0.891	0.21908
A0A1U8HTA0	histidinol-phosphate aminotransferase, chloroplastic-like OS=Gossypium hirsutum OX=3635 GN=LOC107889370	LOC107889370	46.81	29.848	28.6	9	13	2	0.973	1.073	0.977	1.02	0.912	1.076	1.107	0.022518
A0A1U8HTA4	4-hydroxy-3-methylbut-2-enyl diphosphate reductase, chloroplastic-like OS=Gossypium hirsutum OX=3635 GN=LOC107886975	LOC107886975	52.116	34.823	24	11	15	7	0.994	1.045	0.957	1.037	1.011	0.988	1.036	0.20894
A0A1U8HTB1	Ubiquinol oxidase OS=Gossypium hirsutum OX=3635 GN=LOC107887447	LOC107887447	39.462	1.3845	16.3	5	7	1	1.155	0.991	0.988	0.819	1.113	0.923	0.839	0.073221
A0A1U8HTB9	Mitochondrial fission 1 protein OS=Gossypium hirsutum OX=3635 GN=LOC107889381	LOC107889381	18.134	3.8534	19.8	2	2	2
A0A1U8HTC5	Carboxypeptidase OS=Gossypium hirsutum OX=3635 GN=LOC107889351	LOC107889351	52.333	19.635	16.1	7	10	3	0.799	1.292	0.802	1.256	0.747	1.2	1.596	0.000120324
A0A1U8HTD2	methylmalonate-semialdehyde dehydrogenase [acylating], mitochondrial-like OS=Gossypium hirsutum OX=3635 GN=LOC107886997	LOC107886997	57.714	172.95	40.1	18	37	3	1.175	0.809	1.145	0.875	1.088	0.842	0.741	0.00072252
A0A1U8HTD6	Peroxidase OS=Gossypium hirsutum OX=3635 GN=LOC107887476	LOC107887476	35.622	2.1637	23.2	6	11	1	0.851	0.94	1.087	1.04	1.039	1.054	1.019	0.79474
A0A1U8HTF8	putative leucine-rich repeat receptor-like serine/threonine-protein kinase At2g14440 isoform X2 OS=Gossypium hirsutum OX=3635 GN=LOC107887012	LOC107887012	68.328	8.1351	4.8	2	2	2	0.904	1.046	1.002	1.094	0.91	1.078	1.143	0.0198573
A0A1U8HTG2	flowering locus K homology domain-like OS=Gossypium hirsutum OX=3635 GN=LOC107889372	LOC107889372	40.714	8.9063	27.6	10	20	1	1.019	1.016	1.003	1.074	1.01	0.883	0.981	0.73216
A0A1U8HTG6	U1 small nuclear ribonucleoprotein 70 kDa-like isoform X2 OS=Gossypium hirsutum OX=3635 GN=LOC107889376	LOC107889376	52.146	6.4881	11	6	7	1	1.114	0.876	1.11	0.861	1.174	0.825	0.754	0.00037668
A0A1U8HTH2	Beta-adaptin-like protein OS=Gossypium hirsutum OX=3635 GN=LOC107887508	LOC107887508	96.737	139.52	36.6	30	53	11	1.012	1.054	0.951	1.008	0.95	1.093	1.083	0.064019
A0A1U8HTH5	glucan endo-1,3-beta-glucosidase-like isoform X2 OS=Gossypium hirsutum OX=3635 GN=LOC107889424	LOC107889424	37.001	7.6094	14.9	5	5	4	0.434	1.422	0.363	1.454	0.397	2.206	4.256	0.00070441
A0A1U8HTH8	aspartic proteinase nepenthesin-1-like OS=Gossypium hirsutum OX=3635 GN=LOC107889432	LOC107889432	51.112	46.905	36.1	13	33	4	1.568	0.512	1.45	0.542	1.395	0.467	0.345	4.1449e-05
A0A1U8HTI2	ubiquitin-activating enzyme E1 1-like OS=Gossypium hirsutum OX=3635 GN=LOC107887518	LOC107887518	120.14	138.24	39.5	34	69	8	1.106	0.929	1.007	1.016	1.034	1.016	0.941	0.20964
A0A1U8HTK8	syntaxin-121-like OS=Gossypium hirsutum OX=3635 GN=LOC107889449	LOC107889449	37.604	31.831	21.3	6	8	0
A0A1U8HTM7	D-lactate dehydrogenase [cytochrome], mitochondrial-like isoform X1 OS=Gossypium hirsutum OX=3635 GN=LOC107889463	LOC107889463	63.349	20.849	13.9	8	9	1
A0A1U8HTN1	rhomboid-like protein 15 isoform X2 OS=Gossypium hirsutum OX=3635 GN=LOC107889466	LOC107889466	44.054	54.167	17.8	5	6	2	0.989	0.957	0.987	0.905	0.932	1.099	1.018	0.81684
A0A1U8HTP2	pentatricopeptide repeat-containing protein At5g61990, mitochondrial-like OS=Gossypium hirsutum OX=3635 GN=LOC107887593	LOC107887593	107.46	4.864	2	2	2	2
A0A1U8HTP3	glycine-rich RNA-binding protein 4, mitochondrial-like OS=Gossypium hirsutum OX=3635 GN=LOC107887097	LOC107887097	27.154	6.6847	12.5	3	10	2	1.041	1.006	1.032	1.014	1.03	0.921	0.948	0.22056
A0A1U8HTQ6	plant UBX domain-containing protein 2-like OS=Gossypium hirsutum OX=3635 GN=LOC107887607	LOC107887607	47.895	2.6323	9.2	3	3	1
A0A1U8HTR2	pumilio homolog 5-like OS=Gossypium hirsutum OX=3635 GN=LOC107887110	LOC107887110	111.31	81.58	20.9	19	26	2	0.957	1.024	1.023	1.045	0.985	0.98	1.028	0.35992
A0A1U8HTW0	amidase 1-like isoform X2 OS=Gossypium hirsutum OX=3635 GN=LOC107887653	LOC107887653	46.123	63.187	20.8	7	10	3	0.952	0.873	1.077	1.004	1.081	1.01	0.928	0.3024
A0A1U8HTW6	sialyltransferase-like protein 1 OS=Gossypium hirsutum OX=3635 GN=LOC107887151	LOC107887151	54.994	2.4773	4.3	2	2	2
A0A1U8HTX5	nuclear transcription factor Y subunit C-9-like OS=Gossypium hirsutum OX=3635 GN=LOC107887675	LOC107887675	28.664	3.1937	11.6	3	4	1
A0A1U8HTZ0	serine/threonine-protein kinase Nek6-like isoform X2 OS=Gossypium hirsutum OX=3635 GN=LOC107889538	LOC107889538	71.619	29.231	19	11	12	11	1.212	0.724	1.141	0.8	1.224	0.812	0.653	0.00053811
A0A1U8HTZ3	mediator of RNA polymerase II transcription subunit 25-like isoform X3 OS=Gossypium hirsutum OX=3635 GN=LOC107887167	LOC107887167	77.759	3.9955	4.3	3	3	3	0.853	1.235	0.827	1.112	0.798	1.261	1.456	0.00099611
A0A1U8HU11	LOW QUALITY PROTEIN: chaperone protein DnaJ OS=Gossypium hirsutum OX=3635 GN=LOC107887190	LOC107887190	58.739	2.6395	2.8	1	1	1
A0A1U8HU16	probable DNA double-strand break repair Rad50 ATPase isoform X2 OS=Gossypium hirsutum OX=3635 GN=LOC107889559	LOC107889559	19.66	6.4347	41.7	8	13	0
A0A1U8HU38	monodehydroascorbate reductase-like OS=Gossypium hirsutum OX=3635 GN=LOC107889553	LOC107889553	46.936	323.31	67.1	26	77	5	1.069	0.908	1.076	0.907	1.073	0.938	0.856	0.000156258
A0A1U8HU40	serine/threonine-protein kinase CTR1-like isoform X3 OS=Gossypium hirsutum OX=3635 GN=LOC107889566	LOC107889566	83.805	2.0119	4.5	3	3	1	0.927	1.116	0.924	1.089	0.924	1.063	1.178	0.0073585
A0A1U8HU45	TLD domain-containing protein 1 OS=Gossypium hirsutum OX=3635 GN=LOC107889576	LOC107889576	47.193	3.5198	4.8	2	3	2
A0A1U8HU50	cell division cycle protein 48 homolog OS=Gossypium hirsutum OX=3635 GN=LOC107889580	LOC107889580	77.346	9.0496	64.6	39	113	1	0.97	0.913	0.874	1.163	0.989	1.132	1.132	0.23364
A0A1U8HU61	Actin-related T1 OS=Gossypium arboreum OX=29729 GN=F383_04795 PE=4 SV=1	LOC107889588	12.211	1.7854	12.1	1	1	1	1.076	0.908	1.018	1.002	0.969	1.036	0.962	0.47142
A0A1U8HU67	secoisolariciresinol dehydrogenase-like OS=Gossypium hirsutum OX=3635 GN=LOC107889577	LOC107889577	29.077	6.0538	10.6	2	2	1
A0A1U8HU70	probable calcium-binding protein CML27 OS=Gossypium hirsutum OX=3635 GN=LOC107887231	LOC107887231	18.034	134.44	49.7	8	16	1	1.116	0.838	1.137	0.854	1.243	0.759	0.701	0.00198191
A0A1U8HU92	dnaJ protein P58IPK homolog OS=Gossypium hirsutum OX=3635 GN=LOC107889610	LOC107889610	53.282	33.907	20.6	9	9	6	0.964	1.023	1.087	0.936	0.947	1.022	0.994	0.93356
A0A1U8HUC6	40S ribosomal protein S18 isoform X2 OS=Gossypium hirsutum OX=3635 GN=LOC107889621	LOC107889621	16.677	86.386	64.8	10	32	10	0.851	1.132	0.91	1.13	0.871	1.17	1.304	0.00030179
A0A1U8HUE7	uracil phosphoribosyltransferase OS=Gossypium hirsutum OX=3635 GN=LOC107889637	LOC107889637	32.259	2.7271	39.2	10	15	1	1.063	0.795	0.908	0.812	1.206	1.226	0.892	0.47466
A0A1U8HUF8	vicilin-like seed storage protein At2g18540 OS=Gossypium hirsutum OX=3635 GN=LOC107887882	LOC107887882	43.869	36.443	25.5	10	17	3	0.952	1.011	0.944	1.126	1.026	0.962	1.061	0.34394
A0A1U8HUG0	ATP-dependent 6-phosphofructokinase OS=Gossypium hirsutum OX=3635 GN=LOC107887310	LOC107887310	53.23	6.2497	23.2	10	16	3
A0A1U8HUG1	oxysterol-binding protein-related protein 3A-like OS=Gossypium hirsutum OX=3635 GN=LOC107889656	LOC107889656	51.767	22.384	27.4	10	24	3	1.087	0.93	1.007	0.92	1.042	0.984	0.904	0.0291
A0A1U8HUH1	Putative C9E9.04 OS=Gossypium arboreum OX=29729 GN=F383_25022 PE=4 SV=1	LOC107887324	15.201	4.2795	17.8	2	5	1	0.889	1.134	0.943	1.149	0.963	0.955	1.158	0.088016
A0A1U8HUK0	glutathione S-transferase DHAR3, chloroplastic-like OS=Gossypium hirsutum OX=3635 GN=LOC107887344	LOC107887344	29.325	36.812	38.9	10	17	5	1.078	0.921	1.177	0.95	1.095	0.751	0.783	0.033601
A0A1U8HUL0	pentatricopeptide repeat-containing protein At1g26460, mitochondrial-like isoform X2 OS=Gossypium hirsutum OX=3635 GN=LOC107887351	LOC107887351	69.205	24.52	14.8	7	10	3	1.044	0.987	0.981	1.025	1.004	0.969	0.984	0.55228
A0A1U8HUM8	short-chain dehydrogenase TIC 32, chloroplastic-like OS=Gossypium hirsutum OX=3635 GN=LOC107889705	LOC107889705	35.573	22.601	18.9	6	7	3	1.302	0.559	1.272	0.58	1.625	0.546	0.401	0.00034241
A0A1U8HUP4	soluble inorganic pyrophosphatase 4-like OS=Gossypium hirsutum OX=3635 GN=LOC107889711	LOC107889711	24.544	9.8079	20.4	6	8	2	0.98	0.933	1.041	0.9	1.148	0.886	0.858	0.035739
A0A1U8HUQ3	D-aminoacyl-tRNA deacylase-like OS=Gossypium hirsutum OX=3635 GN=LOC107887383	LOC107887383	34.898	12.435	13.1	4	6	2	0.724	1.405	0.758	1.236	0.742	1.25	1.75	0.00020244
A0A1U8HUS8	mannosylglycoprotein endo-beta-mannosidase-like isoform X1 OS=Gossypium hirsutum OX=3635 GN=LOC107887393	LOC107887393	109.96	14.819	7	6	7	3	0.928	1.115	1.025	0.991	0.931	1.036	1.089	0.145258
A0A1U8HUU4	glutathione S-transferase U8-like OS=Gossypium hirsutum OX=3635 GN=LOC107889739	LOC107889739	24.612	14.682	23.1	6	19	4	0.91	1.126	0.829	0.934	0.972	1.309	1.243	0.123764
A0A1U8HV18	probable steroid-binding protein 3 OS=Gossypium hirsutum OX=3635 GN=LOC107893471 PE=3 SV=1	LOC107889815	26.817	76.038	19.8	4	19	2	0.959	0.94	1.137	0.974	1.265	0.721	0.784	0.119818
A0A1U8HV63	4-alpha-glucanotransferase DPE2-like isoform X2 OS=Gossypium hirsutum OX=3635 GN=LOC107889849	LOC107889849	107.96	66.015	19.4	17	18	4	0.891	1.066	0.862	0.99	0.912	1.347	1.277	0.066518
A0A1U8HVB9	Importin subunit alpha OS=Gossypium hirsutum OX=3635 GN=LOC107888328	LOC107888328	58.307	22.367	29.5	15	29	0
A0A1U8HVD8	E3 ubiquitin-protein ligase HOS1-like OS=Gossypium hirsutum OX=3635 GN=LOC107887567	LOC107887567	107.63	9.8541	3.9	3	3	3
A0A1U8HVH9	replication protein A 32 kDa subunit A-like isoform X2 OS=Gossypium hirsutum OX=3635 GN=LOC107888376	LOC107888376	30.938	44.658	29.2	6	8	3	1.047	0.901	1.132	0.924	1.038	0.94	0.859	0.00752
A0A1U8HVI8	Coatomer subunit beta OS=Gossypium hirsutum OX=3635 GN=LOC107888379	LOC107888379	105.73	111.09	46.8	35	63	7	0.992	1.032	0.961	0.971	0.967	1.135	1.075	0.20606
A0A1U8HVJ8	Transmembrane 9 superfamily member OS=Gossypium hirsutum OX=3635 GN=LOC107888386	LOC107888386	74.33	38.988	16.1	10	15	1	1.028	0.972	1.055	0.89	1.056	0.997	0.911	0.056276
A0A1U8HVK7	bifunctional epoxide hydrolase 2-like OS=Gossypium hirsutum OX=3635 GN=LOC107890052	LOC107890052	32.604	9.1016	16.3	4	4	4	0.594	1.362	0.637	1.492	0.513	1.583	2.544	0.00026376
A0A1U8HVL3	acyl-CoA-binding domain-containing protein 4-like OS=Gossypium hirsutum OX=3635 GN=LOC107887632	LOC107887632	73.867	87.429	30.5	19	32	3	1.172	0.995	1.031	0.779	1.059	0.951	0.835	0.095776
A0A1U8HVM3	vesicle-associated membrane protein 711-like OS=Gossypium hirsutum OX=3635 GN=LOC107888407	LOC107888407	25.142	79.838	53.2	10	17	3	1.105	0.928	1.12	0.918	1.038	0.906	0.843	0.0022448
A0A1U8HVR8	Alpha-mannosidase OS=Gossypium hirsutum OX=3635 GN=LOC107888446	LOC107888446	114.91	132.12	20.6	22	59	4	0.866	1.163	0.872	1.171	0.855	1.133	1.337	1.75248e-05
A0A1U8HVS7	probable 3-beta-hydroxysteroid-Delta(8),Delta(7)-isomerase OS=Gossypium hirsutum OX=3635 GN=LOC107888454	LOC107888454	24.622	40.688	9.7	2	3	2	0.937	1.182	0.883	1.049	0.899	1.104	1.227	0.0063362
A0A1U8HVV1	thaumatin-like protein 1b OS=Gossypium hirsutum OX=3635 GN=LOC107890154	LOC107890154	25.718	52.526	41.4	5	10	5	1.027	0.843	1.13	0.844	1.378	0.716	0.68	0.020385
A0A1U8HVX2	ultraviolet-B receptor UVR8-like OS=Gossypium hirsutum OX=3635 GN=LOC107888482	LOC107888482	47.551	78.02	52.2	18	27	11	1.094	0.91	1.126	0.904	1.081	0.852	0.808	0.00090086
A0A1U8HVX6	short-chain type dehydrogenase/reductase-like OS=Gossypium hirsutum OX=3635 GN=LOC107888483	LOC107888483	33.638	10.741	12.5	3	4	3	0.658	1.364	0.625	1.346	0.643	1.526	2.199	5.5049e-05
A0A1U8HVY6	short-chain type dehydrogenase/reductase-like OS=Gossypium hirsutum OX=3635 GN=LOC107888492	LOC107888492	27.684	2.5813	32.5	8	10	2	1.009	1.06	1.049	0.842	1.022	1.007	0.944	0.43176
A0A1U8HW19	ABC transporter G family member 8-like OS=Gossypium hirsutum OX=3635 GN=LOC107890247	LOC107890247	66.878	1.5212	1.7	1	1	1
A0A1U8HW50	Ribosome biogenesis protein WDR12 homolog OS=Gossypium hirsutum OX=3635 GN=LOC107888541	LOC107888541	48.149	10.159	15.8	6	7	6	0.95	1.092	0.957	1.025	0.931	1.103	1.135	0.0067024
A0A1U8HW58	Biotin carboxyl carrier protein of acetyl-CoA carboxylase OS=Gossypium hirsutum OX=3635 GN=LOC107888545	LOC107888545	30.336	-2	13	4	8	1	0.755	0.456	1.072	1.126	1.323	1.263	0.903	0.66766
A0A1U8HW63	glucan endo-1,3-beta-glucosidase 8-like OS=Gossypium hirsutum OX=3635 GN=LOC107888547	LOC107888547	52.287	62.864	20.5	8	12	7	0.622	1.259	0.734	1.401	0.652	1.475	2.059	0.00043975
A0A1U8HW72	Plant cadmium resistance 10-like protein OS=Gossypium arboreum OX=29729 GN=F383_30430 PE=4 SV=1	LOC107887880	64.097	1.5087	1.8	1	1	1
A0A1U8HW83	probable WRKY transcription factor 3 OS=Gossypium hirsutum OX=3635 GN=LOC107888565	LOC107888565	54.966	14.462	13.6	7	8	4	0.929	1.097	0.926	0.957	1.059	1.062	1.069	0.32756
A0A1U8HWC1	40S ribosomal protein S9-2-like OS=Gossypium hirsutum OX=3635 GN=LOC107890422	LOC107890422	23.079	3.8883	39.1	8	17	1
A0A1U8HWC5	Structural maintenance of chromosomes protein OS=Gossypium hirsutum OX=3635 GN=LOC107888594	LOC107888594	141.94	-2	0.8	1	1	1	0.979	1.382	0.891	1.127	0.756	0.922	1.307	0.135682
A0A1U8HWD0	protein IQ-DOMAIN 32-like isoform X2 OS=Gossypium hirsutum OX=3635 GN=LOC107890409	LOC107890409	92.691	5.2268	19.2	14	18	1
A0A1U8HWF5	ALBINO3-like protein 3, mitochondrial isoform X2 OS=Gossypium hirsutum OX=3635 GN=LOC107890438	LOC107890438	42.033	1.375	2.1	1	1	1	1.108	0.871	1.218	0.832	1.101	0.822	0.737	0.00120004
A0A1U8HWI2	KH domain-containing protein At4g18375-like isoform X3 OS=Gossypium hirsutum OX=3635 GN=LOC107890459	LOC107890459	57.577	141.32	24.2	11	14	2	1.063	0.951	1.115	0.939	1.016	0.901	0.874	0.0128551
A0A1U8HWJ1	60S ribosomal protein L27a-3-like OS=Gossypium hirsutum OX=3635 GN=LOC107888655	LOC107888655	16.412	6.2443	30.8	4	14	1	0.797	1.191	0.865	1.233	0.857	1.13	1.411	0.00068259
A0A1U8HWK8	glutaredoxin-like OS=Gossypium hirsutum OX=3635 GN=LOC107888669	LOC107888669	11.341	86.803	43.9	3	8	2	1.046	0.963	1.107	0.974	1.06	0.806	0.854	0.064119
A0A1U8HWL4	Ribosomal RNA small subunit methyltransferase A OS=Gossypium arboreum OX=29729 GN=F383_13611 PE=4 SV=1	LOC107888672	37.372	6.0787	10.8	4	4	4	0.992	1.069	0.962	1.048	0.942	1.014	1.081	0.022237
A0A1U8HWN1	phosphate transporter PHO1 homolog 9-like isoform X1 OS=Gossypium hirsutum OX=3635 GN=LOC107890477	LOC107890477	89.747	3.1704	3.9	3	3	3
A0A1U8HWP0	26S proteasome non-ATPase regulatory subunit 1 homolog OS=Gossypium hirsutum OX=3635 GN=LOC107890485	LOC107890485	109.74	34.107	24.7	23	42	3	0.939	0.963	0.924	1.012	0.99	1.212	1.117	0.21904
A0A1U8HWP4	Methylenetetrahydrofolate reductase OS=Gossypium hirsutum OX=3635 GN=LOC107890499	LOC107890499	66.748	287.44	59	29	68	5	1.01	1.017	0.983	0.999	0.971	1.007	1.02	0.194435
A0A1U8HWQ7	methionine--tRNA ligase, cytoplasmic-like OS=Gossypium hirsutum OX=3635 GN=LOC107890497	LOC107890497	89.638	-2	37	28	53	1	1.364	1.006	1.114	0.575	0.996	0.907	0.716	0.144238
A0A1U8HWR2	Serine hydroxymethyltransferase OS=Gossypium hirsutum OX=3635 GN=LOC107890500	LOC107890500	51.934	97.634	40.1	18	53	9	0.965	1.022	0.976	1.014	0.979	1.043	1.054	0.0050215
A0A1U8HWS0	Adenosylhomocysteinase OS=Gossypium hirsutum OX=3635 GN=LOC107890502	LOC107890502	53.237	320.27	55.5	26	106	6	1.002	0.991	0.943	1.025	1.005	1.05	1.039	0.22034
A0A1U8HWS9	T21E18.2 protein OS=Arabidopsis thaliana OX=3702 GN=T21E18.2 PE=4 SV=1	LOC107890528	74.672	25.303	8	5	5	5	1.01	0.959	0.989	1.039	1.029	0.986	0.985	0.59528
A0A1U8HWT1	Protein transport protein SEC23 OS=Gossypium hirsutum OX=3635 GN=LOC107890510	LOC107890510	84.999	134.19	23.4	14	22	7	0.92	1.051	0.919	1.016	0.944	1.16	1.16	0.022796
A0A1U8HWT4	2,3-dimethylmalate lyase isoform X1 OS=Gossypium hirsutum OX=3635 GN=LOC107890531	LOC107890531	53.697	61.141	28.4	11	13	11	0.866	1.102	0.94	1.103	0.925	1.149	1.228	0.00197824
A0A1U8HWT8	probable aldo-keto reductase 2 OS=Gossypium hirsutum OX=3635 GN=LOC107890522	LOC107890522	37.572	1.3782	30.3	12	25	1	0.87	1.081	0.854	0.956	1.105	1.18	1.137	0.26966
A0A1U8HWU9	Eukaryotic translation initiation factor 3 subunit H OS=Gossypium hirsutum OX=3635 GN=LOC107890527	LOC107890527	38.705	64.966	26.7	7	14	4	1.015	1.04	0.957	1.007	0.961	0.997	1.038	0.177382
A0A1U8HWW7	mitochondrial import receptor subunit TOM20-like OS=Gossypium hirsutum OX=3635 GN=LOC107888752	LOC107888752	21.37	1.3932	58	10	13	1	1.024	0.904	1.11	0.923	1.062	0.963	0.873	0.0104363
A0A1U8HWX3	phosphopantetheine adenylyltransferase-like isoform X1 OS=Gossypium hirsutum OX=3635 GN=LOC107890538	LOC107890538	20.378	6.5185	24.2	4	5	3	0.837	1.145	0.977	1.045	0.892	1.048	1.197	0.028683
A0A1U8HWX6	Subtilisin-like protease 3 OS=Gossypium arboreum OX=29729 GN=F383_00757 PE=4 SV=1	LOC107890556	10.873	2.1963	10.2	1	1	1
A0A1U8HWZ1	40S ribosomal protein S7 OS=Gossypium hirsutum OX=3635 GN=LOC107888769	LOC107888769	22.064	29.153	35.1	6	13	0
A0A1U8HX03	Phosphoglycerate kinase OS=Gossypium arboreum OX=29729 GN=F383_05411 PE=4 SV=1	LOC107890569	40.425	8.1943	9.8	3	4	2	0.898	1.124	0.963	0.969	0.964	1.12	1.137	0.079345
A0A1U8HX19	probable acyl-activating enzyme 5, peroxisomal OS=Gossypium hirsutum OX=3635 GN=LOC107890572	LOC107890572	53.182	3.9544	7.8	3	3	1	1.095	0.788	1.191	0.888	1.104	0.892	0.758	0.0045958
A0A1U8HX24	vesicle-associated membrane protein 721 OS=Gossypium hirsutum OX=3635 GN=LOC107890576	LOC107890576	24.655	11.17	33.3	7	14	3	0.906	0.925	0.93	0.973	0.93	1.392	1.189	0.34888
A0A1U8HX26	Pectate lyase OS=Gossypium hirsutum OX=3635 GN=LOC107890584	LOC107890584	49.058	7.9555	12.5	3	3	3
A0A1U8HX31	Inosine triphosphate pyrophosphatase OS=Gossypium hirsutum OX=3635 GN=LOC107890586	LOC107890586	22.275	9.1194	22.2	3	4	3	0.936	1.06	1.087	1.004	0.906	0.913	1.016	0.81698
A0A1U8HX59	chaperonin CPN60-2, mitochondrial OS=Gossypium hirsutum OX=3635 GN=LOC107890591	LOC107890591	61.443	10.813	61.7	32	117	3	1.075	0.998	1.016	0.996	0.996	0.989	0.966	0.28034
A0A1U8HX62	Proteasome subunit beta type OS=Gossypium hirsutum OX=3635 GN=LOC107888373	LOC107888373	25.401	171.19	57.4	14	40	1	0.943	1.042	0.96	1.086	0.949	1.051	1.115	0.0013589
A0A1U8HX68	60S ribosomal protein L6 OS=Gossypium hirsutum OX=3635 GN=LOC107888813	LOC107888813	26.158	6.4882	23.6	6	15	1	0.922	1.159	0.836	1.154	0.802	1.204	1.374	0.00183681
A0A1U8HX74	plastid lipid-associated protein 3, chloroplastic-like isoform X2 OS=Gossypium hirsutum OX=3635 GN=LOC107890605	LOC107890605	39.83	19.977	41.7	10	13	3	0.91	1.114	0.968	1.153	0.918	1.029	1.179	0.0135006
A0A1U8HX89	cytochrome B5-like protein OS=Gossypium hirsutum OX=3635 GN=LOC107888392	LOC107888392	12.839	1.1625	6.9	1	2	1
A0A1U8HX93	tobamovirus multiplication protein 2A-like OS=Gossypium hirsutum OX=3635 GN=LOC107890623	LOC107890623	31.026	87.471	22.7	5	8	2	1.188	0.898	0.977	0.811	1.205	0.934	0.784	0.039343
A0A1U8HXA1	plasminogen activator inhibitor 1 RNA-binding protein-like OS=Gossypium hirsutum OX=3635 GN=LOC107890637	LOC107890637	38.806	84.278	41.2	13	41	3	0.98	0.965	1.061	1.047	1.058	0.828	0.916	0.28236
A0A1U8HXA6	asparagine--tRNA ligase, chloroplastic/mitochondrial-like OS=Gossypium hirsutum OX=3635 GN=LOC107890642	LOC107890642	56.181	4.3375	9.8	5	5	1
A0A1U8HXB1	protein WVD2-like 6 isoform X2 OS=Gossypium hirsutum OX=3635 GN=LOC107888411	LOC107888411	47.137	8.4578	11.8	5	5	3	1.405	0.877	1.3	0.523	1.227	0.561	0.499	0.0123393
A0A1U8HXB4	DEAD-box ATP-dependent RNA helicase 56-like isoform X1 OS=Gossypium hirsutum OX=3635 GN=LOC107888417	LOC107888417	48.398	10.274	31.5	12	35	1	1.04	1.102	1.066	0.932	0.901	0.968	0.998	0.98388
A0A1U8HXC0	transaldolase-like OS=Gossypium hirsutum OX=3635 GN=LOC107890651	LOC107890651	43.023	2.9519	33.9	14	20	2	1.109	0.923	1.107	0.842	1.155	0.829	0.77	0.00192027
A0A1U8HXD3	hsp70-Hsp90 organizing protein 3-like OS=Gossypium hirsutum OX=3635 GN=LOC107890655	LOC107890655	65.22	200.01	61.2	36	80	6	1.053	0.973	1.06	0.951	1.04	0.93	0.905	0.0021587
A0A1U8HXE1	stem-specific protein TSJT1-like OS=Gossypium hirsutum OX=3635 GN=LOC107888871	LOC107888871	25.428	89.932	40.7	9	19	3	0.776	1.235	0.796	1.325	0.752	1.293	1.658	4.1845e-05
A0A1U8HXE3	monocopper oxidase-like protein SKU5 OS=Gossypium hirsutum OX=3635 GN=LOC107890654	LOC107890654	66.775	45.978	14	6	10	1
A0A1U8HXG6	ureidoglycolate hydrolase-like OS=Gossypium hirsutum OX=3635 GN=LOC107888887	LOC107888887	51.771	40.338	20.8	8	9	1
A0A1U8HXG7	glutamate--cysteine ligase, chloroplastic-like isoform X2 OS=Gossypium hirsutum OX=3635 GN=LOC107890686	LOC107890686	59.324	1.1953	20.5	9	21	1
A0A1U8HXH0	plant UBX domain-containing protein 8-like OS=Gossypium hirsutum OX=3635 GN=LOC107890682	LOC107890682	62.738	0.965	5.6	3	4	2
A0A1U8HXI2	Ribosome maturation factor RimP OS=Gossypium arboreum OX=29729 GN=F383_14822 PE=4 SV=1	LOC107890703	23.185	10.552	23	4	4	4	1.247	0.86	1.191	0.588	1.202	0.849	0.631	0.063184
A0A1U8HXK1	CBS domain-containing protein CBSCBSPB3-like isoform X3 OS=Gossypium hirsutum OX=3635 GN=LOC107888485	LOC107888485	56.873	5.7014	8.9	4	5	2	0.818	1.117	0.901	1.151	0.884	1.195	1.33	0.00127959
A0A1U8HXK7	probable fructokinase-7 OS=Gossypium hirsutum OX=3635 GN=LOC107890723	LOC107890723	34.594	1.5629	5.3	2	2	1
A0A1U8HXN2	Aspartate aminotransferase OS=Gossypium hirsutum OX=3635 GN=LOC107888512	LOC107888512	47.164	136.17	45.3	14	22	14	0.966	1.064	0.955	1.034	0.961	1.021	1.082	0.0033607
A0A1U8HXN9	probable prolyl 4-hydroxylase 12 OS=Gossypium hirsutum OX=3635 GN=LOC107890747	LOC107890747	21.201	2.4515	6.9	1	1	1
A0A1U8HXP6	dihydrolipoyl dehydrogenase 2, chloroplastic-like isoform X1 OS=Gossypium hirsutum OX=3635 GN=LOC107888950	LOC107888950	60.151	57.425	32.9	15	23	2
A0A1U8HXR4	protein BOBBER 1-like OS=Gossypium hirsutum OX=3635 GN=LOC107890769	LOC107890769	33.032	34.199	47.4	17	38	4	1.116	0.963	1.041	0.954	1.104	0.769	0.824	0.060337
A0A1U8HXR6	protein GFS12 OS=Gossypium hirsutum OX=3635 GN=LOC107888968	LOC107888968	183.86	1.3175	1.8	2	2	2
A0A1U8HXR8	molybdate-anion transporter-like OS=Gossypium hirsutum OX=3635 GN=LOC107890785	LOC107890785	50.353	2.4318	10.3	5	7	1
A0A1U8HXS4	acyl-CoA-binding domain-containing protein 1-like OS=Gossypium hirsutum OX=3635 GN=LOC107890777	LOC107890777	39.963	8.6424	17.4	5	6	1
A0A1U8HXT3	probable mitochondrial-processing peptidase subunit beta, mitochondrial OS=Gossypium hirsutum OX=3635 GN=LOC107888546	LOC107888546	59.137	224.9	44.3	20	59	1
A0A1U8HXT8	Alpha-1,4 glucan phosphorylase OS=Gossypium hirsutum OX=3635 GN=LOC107888550	LOC107888550	112.02	6.367	23.8	22	30	2	0.98	1.085	0.911	1.035	0.999	1.021	1.087	0.0673
A0A1U8HXU8	60S acidic ribosomal protein P1-like OS=Gossypium hirsutum OX=3635 GN=LOC107890794	LOC107890794	11.274	10.809	37.5	1	2	1	0.825	1.335	0.838	1.161	0.72	1.215	1.557	0.0021957
A0A1U8HXV3	probable ubiquitin conjugation factor E4 OS=Gossypium hirsutum OX=3635 GN=LOC107888562	LOC107888562	118.16	255.38	26.5	23	35	23	1.036	0.994	0.988	0.985	0.995	1.026	0.995	0.8237
A0A1U8HXW2	Pectinesterase OS=Gossypium hirsutum OX=3635 GN=LOC107888573	LOC107888573	35.536	33.255	16.8	4	7	4	1.05	1	1.031	0.969	1.031	0.933	0.933	0.028518
A0A1U8HXY6	fatty acid amide hydrolase-like isoform X1 OS=Gossypium hirsutum OX=3635 GN=LOC107890812	LOC107890812	73.397	38.574	9.3	6	9	5	1.835	0.284	1.407	0.335	1.603	0.32	0.194	5.8179e-05
A0A1U8HXY9	perakine reductase-like OS=Gossypium hirsutum OX=3635 GN=LOC107889027	LOC107889027	38.824	15.075	42	16	31	1	0.862	1.173	0.857	1.18	0.886	1.108	1.329	0.00022445
A0A1U8HY01	AP-2 complex subunit alpha OS=Gossypium hirsutum OX=3635 GN=LOC107889041	LOC107889041	114.11	-2	35.7	33	57	1
A0A1U8HY06	thyroid adenoma-associated protein homolog isoform X2 OS=Gossypium hirsutum OX=3635 GN=LOC107888604	LOC107888604	204.77	4.8251	2.4	3	4	3	0.859	1.017	0.992	1.011	0.97	1.107	1.111	0.11682
A0A1U8HY07	acetylornithine aminotransferase, mitochondrial-like OS=Gossypium hirsutum OX=3635 GN=LOC107889047	LOC107889047	48.649	92.582	30.3	11	17	5	0.941	1.006	1.001	1.015	1.052	1.01	1.012	0.72062
A0A1U8HY19	T-complex protein 1 subunit delta OS=Gossypium hirsutum OX=3635 GN=LOC107890839	LOC107890839	57.588	230.1	53.1	28	61	4	1.104	0.885	1.097	0.866	1.064	0.909	0.815	0.00034171
A0A1U8HY23	eukaryotic peptide chain release factor GTP-binding subunit ERF3A-like isoform X2 OS=Gossypium hirsutum OX=3635 GN=LOC107890842	LOC107890842	52.73	100.61	40.3	20	40	3	0.991	0.948	0.975	0.95	1.061	1.021	0.964	0.36568
A0A1U8HY34	2-(3-amino-3-carboxypropyl)histidine synthase subunit 2 OS=Gossypium hirsutum OX=3635 GN=LOC107890838	LOC107890838	54.139	2.8723	2.2	1	2	1	0.962	0.932	0.971	0.972	1.032	1.155	1.032	0.7133
A0A1U8HY40	asparagine synthetase [glutamine-hydrolyzing] OS=Gossypium hirsutum OX=3635 GN=LOC107889073	LOC107889073	56.26	3.3687	22.9	10	17	2
A0A1U8HY49	dihydropyrimidine dehydrogenase (NADP(+)), chloroplastic OS=Gossypium hirsutum OX=3635 GN=LOC107890863	LOC107890863	45.967	143.08	35.2	16	33	16	0.821	1.169	0.843	1.201	0.807	1.216	1.451	2.3514e-05
A0A1U8HY54	protein argonaute 5-like OS=Gossypium hirsutum OX=3635 GN=LOC107889086	LOC107889086	110.06	194.81	37.5	36	54	14	1.085	0.89	1.075	0.966	1.043	0.932	0.87	0.0063225
A0A1U8HY66	zinc finger CCCH domain-containing protein 41-like OS=Gossypium hirsutum OX=3635 GN=LOC107888662	LOC107888662	102.93	10.538	4.8	4	5	4	0.945	1.004	1.07	1.005	1.026	0.944	0.971	0.53462
A0A1U8HY77	protein argonaute 1-like isoform X2 OS=Gossypium hirsutum OX=3635 GN=LOC107890886	LOC107890886	116.3	4.0458	24.2	20	27	1	1.503	0.66	1.344	0.536	1.359	0.454	0.392	0.00114386
A0A1U8HY80	At5g63040 OS=Arabidopsis thaliana OX=3702 GN=MJH22.10 PE=2 SV=1	LOC107890879	39.344	3.0358	3.1	1	1	1	1.035	0.951	1.025	0.82	1.189	0.966	0.842	0.072421
A0A1U8HYA3	diphthine methyltransferase homolog OS=Gossypium hirsutum OX=3635 GN=LOC107890893	LOC107890893	38.303	4.1399	10.1	3	3	1
A0A1U8HYA8	26S protease regulatory subunit 6B homolog OS=Gossypium hirsutum OX=3635 GN=LOC107890897	LOC107890897	47.166	3.124	50.5	22	41	1	0.932	1.076	0.921	1.095	0.858	1.171	1.233	0.0045814
A0A1U8HYA9	heat shock 70 kDa protein 15-like OS=Gossypium hirsutum OX=3635 GN=LOC107889126	LOC107889126	94.394	60.511	53.4	42	115	6	1.008	0.956	0.989	0.959	1.002	1.07	0.995	0.8868
A0A1U8HYB6	angio-associated migratory cell protein-like isoform X2 OS=Gossypium hirsutum OX=3635 GN=LOC107890913	LOC107890913	41.207	21.812	17.2	5	6	2	0.862	0.958	1.007	1.019	1.022	1.16	1.085	0.35788
A0A1U8HYD2	Bahcc1 OS=Gossypium arboreum OX=29729 GN=F383_20220 PE=4 SV=1	LOC107890907	157.36	2.545	3	5	5	2	1.134	1.027	1.011	0.817	1.172	0.816	0.802	0.064236
A0A1U8HYD3	Nascent polypeptide-associated complex subunit beta OS=Gossypium hirsutum OX=3635 GN=LOC107888704	LOC107888704	17.579	3.0047	26.5	5	10	1	1.056	1.033	1.057	1.046	0.919	0.893	0.98	0.78172
A0A1U8HYD8	BRCA1-A complex subunit Abraxas OS=Gossypium arboreum OX=29729 GN=F383_01817 PE=4 SV=1	LOC107890935	34.119	2.6448	2.9	1	1	1
A0A1U8HYE6	LOW QUALITY PROTEIN: protein MON2 homolog OS=Gossypium hirsutum OX=3635 GN=LOC107888717	LOC107888717	177.06	21.042	8.4	13	15	13	1.008	0.968	0.994	1.047	1.013	0.982	0.994	0.80478
A0A1U8HYE9	probable thiol methyltransferase 2 isoform X3 OS=Gossypium hirsutum OX=3635 GN=LOC107890918	LOC107890918	23.116	8.9846	5.3	1	2	1	1.285	0.78	1.189	0.677	1.239	0.754	0.595	0.00042026
A0A1U8HYF0	pyruvate decarboxylase 2 OS=Gossypium hirsutum OX=3635 GN=LOC107890944	LOC107890944	65.135	-2	28.4	12	27	0
A0A1U8HYF2	bifunctional monothiol glutaredoxin-S16, chloroplastic-like OS=Gossypium hirsutum OX=3635 GN=LOC107890951	LOC107890951	32.557	22.586	21.2	5	7	2	0.966	1.06	0.936	1.096	0.994	0.975	1.081	0.118337
A0A1U8HYF8	60S ribosomal protein L7-4 OS=Gossypium hirsutum OX=3635 GN=LOC107889153	LOC107889153	28.317	2.2034	47.3	15	61	1	0.917	1.087	0.833	1.179	0.841	1.226	1.348	0.0031165
A0A1U8HYG0	probable NAD(P)H dehydrogenase (Quinone) FQR1-like 2 OS=Gossypium hirsutum OX=3635 GN=LOC107888732	LOC107888732	27.536	3.0886	30.7	7	9	1
A0A1U8HYH3	transmembrane protein 209-like OS=Gossypium hirsutum OX=3635 GN=LOC107889159	LOC107889159	74.903	8.0411	7.6	5	5	5	1.132	0.959	1.053	0.851	1.105	0.888	0.82	0.0082396
A0A1U8HYI3	protein SUPPRESSOR OF K(+) TRANSPORT GROWTH DEFECT 1-like OS=Gossypium hirsutum OX=3635 GN=LOC107889165	LOC107889165	48.517	4.4628	40.2	14	27	0
A0A1U8HYJ0	translation initiation factor eIF-2B subunit delta-like isoform X1 OS=Gossypium hirsutum OX=3635 GN=LOC107888757	LOC107888757	70.256	20.705	19.3	12	14	11	0.952	1.044	0.962	1.077	0.884	1.121	1.159	0.0118358
A0A1U8HYJ6	protein DEFECTIVE IN EXINE FORMATION 1-like OS=Gossypium hirsutum OX=3635 GN=LOC107890982	LOC107890982	94.039	1.0806	3.2	3	3	1	0.801	0.94	1.052	0.971	0.994	1.276	1.119	0.4378
A0A1U8HYK8	probable aquaporin PIP1-4 OS=Gossypium hirsutum OX=3635 GN=LOC107890974	LOC107890974	30.767	8.6538	8	2	5	2	1.488	0.544	1.404	0.435	1.347	0.405	0.326	0.00027571
A0A1U8HYL7	Peptidylprolyl isomerase OS=Gossypium hirsutum OX=3635 GN=LOC107890999	LOC107890999	70.22	1.108	24.7	14	20	1
A0A1U8HYN5	thioredoxin-like protein Clot OS=Gossypium hirsutum OX=3635 GN=LOC107889220	LOC107889220	15.234	70.23	60.4	9	20	1
A0A1U8HYP0	F7O18.3 protein OS=Arabidopsis thaliana OX=3702 GN=At3g04560 PE=2 SV=1	LOC107889222	45.287	4.0744	4.9	2	2	2	0.905	1.046	1.047	0.922	1.129	0.951	0.947	0.53252
A0A1U8HYR6	peroxisome biogenesis protein 3-2-like isoform X3 OS=Gossypium hirsutum OX=3635 GN=LOC107888798	LOC107888798	35.139	4.4391	8.3	2	2	2
A0A1U8HYS1	Pectate lyase OS=Gossypium hirsutum OX=3635 GN=LOC107891022	LOC107891022	41.438	7.2152	12.2	4	4	4	0.923	1.081	0.976	1.011	0.908	1.141	1.152	0.0271
A0A1U8HYT4	heat shock cognate 70 kDa protein-like OS=Gossypium hirsutum OX=3635 GN=LOC107891043	LOC107891043	70.871	48.396	55	34	190	2	0.985	0.988	0.934	1.026	0.985	1.073	1.063	0.109962
A0A1U8HYU4	E3 ubiquitin-protein ligase PRT6-like OS=Gossypium hirsutum OX=3635 GN=LOC107891054	LOC107891054	229.8	9.5534	2.9	6	6	3	0.963	0.993	1.03	0.954	0.965	1.116	1.035	0.55842
A0A1U8HYU5	Proteasome subunit alpha type OS=Gossypium hirsutum OX=3635 GN=LOC107889267	LOC107889267	27.413	-2	61.4	14	33	0
A0A1U8HYW7	GYF domain-containing-like protein isoform 1 OS=Theobroma cacao OX=3641 GN=TCM_017263 PE=4 SV=1	LOC107888835	186.16	5.8363	4.7	4	4	3
A0A1U8HYX5	aldo-keto reductase family 4 member C8-like OS=Gossypium hirsutum OX=3635 GN=LOC107891074	LOC107891074	34.857	9.3399	49.5	15	25	3	1.031	0.883	0.985	1.046	1.093	0.963	0.93	0.26798
A0A1U8HYY4	NAD(P)-binding Rossmann-fold superfamily protein isoform 1 OS=Theobroma cacao OX=3641 GN=TCM_021916 PE=4 SV=1	LOC107891063	35.894	155.88	49.7	13	30	13	1.281	0.657	1.237	0.682	1.331	0.591	0.501	0.000136425
A0A1U8HZ04	12S seed storage protein CRD-like OS=Gossypium hirsutum OX=3635 GN=LOC107891101	LOC107891101	39.299	73.007	33	11	23	3	0.671	1.367	0.707	1.157	0.595	1.675	2.128	0.0032554
A0A1U8HZ06	Sorting nexin-13 OS=Gossypium arboreum OX=29729 GN=F383_23153 PE=4 SV=1	LOC107891087	109.85	3.0092	2.2	2	2	2	1.03	0.924	1.029	1.05	0.966	1.011	0.987	0.75874
A0A1U8HZ64	probable catabolite repression protein creC isoform X2 OS=Gossypium hirsutum OX=3635 GN=LOC107891124	LOC107891124	55.522	7.7668	9.7	5	5	5	0.985	0.996	0.994	1.039	1	1	1.019	0.26254
A0A1U8HZ72	Phenylalanine ammonia-lyase OS=Gossypium hirsutum OX=3635 GN=LOC107891138	LOC107891138	77.938	10.067	22.4	16	31	1	0.901	0.96	0.917	1.139	1.032	1.085	1.117	0.172424
A0A1U8HZ96	rho GTPase-activating protein 68F-like isoform X2 OS=Gossypium hirsutum OX=3635 GN=LOC107889379	LOC107889379	27.142	0.98937	3.8	1	1	1
A0A1U8HZA2	heavy metal-associated isoprenylated plant protein 3-like OS=Gossypium hirsutum OX=3635 GN=LOC107891154	LOC107891154	38.712	11.452	10.8	4	4	4
A0A1U8HZB8	Carboxypeptidase OS=Gossypium hirsutum OX=3635 GN=LOC107888962	LOC107888962	53.037	1.4704	2.3	1	2	1
A0A1U8HZC5	elongator complex protein 6-like OS=Gossypium hirsutum OX=3635 GN=LOC107891166	LOC107891166	28.281	2.4746	4.4	1	2	1
A0A1U8HZD4	Transmembrane 70, mitochondrial OS=Gossypium arboreum OX=29729 GN=F383_21700 PE=4 SV=1	LOC107891175	26.87	6.9404	13.8	2	2	2	0.991	1.042	0.875	0.995	0.977	1.164	1.126	0.125059
A0A1U8HZD6	enhancer of mRNA-decapping protein 4-like isoform X2 OS=Gossypium hirsutum OX=3635 GN=LOC107888981	LOC107888981	149.64	1.2595	11.4	14	18	1	1.446	0.867	1.204	0.577	1.084	0.747	0.587	0.02076
A0A1U8HZE0	Protein CLEC16A OS=Gossypium arboreum OX=29729 GN=F383_05667 PE=4 SV=1	LOC107891179	88.481	4.1209	2.3	2	3	2	1.481	0.574	1.355	0.594	1.36	0.493	0.396	0.000136348
A0A1U8HZE7	glucan endo-1,3-beta-glucosidase, acidic-like OS=Gossypium hirsutum OX=3635 GN=LOC107889425	LOC107889425	38.162	1.8639	19.3	5	13	1	0.577	1.348	0.558	1.603	0.563	1.537	2.643	5.6533e-05
A0A1U8HZG5	syntaxin-121-like OS=Gossypium hirsutum OX=3635 GN=LOC107891194	LOC107891194	37.552	6.391	21.3	6	8	1	1.153	0.901	0.988	0.915	1.109	0.921	0.842	0.068421
A0A1U8HZJ4	Mitotic checkpoint serine/threonine-protein kinase BUB1, putative isoform 1 OS=Theobroma cacao OX=3641 GN=TCM_023090 PE=4 SV=1	LOC107889456	62.813	2.4746	2.1	1	2	1	1.065	0.945	1.027	0.888	1.172	0.884	0.832	0.0153238
A0A1U8HZK0	rhomboid-like protein 15 OS=Gossypium hirsutum OX=3635 GN=LOC107891214	LOC107891214	44.428	23.826	14.7	4	4	1	0.932	1.093	0.929	1.045	0.93	1.112	1.164	0.0145802
A0A1U8HZK1	Proteasome subunit alpha type OS=Gossypium hirsutum OX=3635 GN=LOC107889031	LOC107889031	25.994	45.505	59.1	11	35	1	0.972	1.084	0.947	1.166	1.007	0.841	1.056	0.67354
A0A1U8HZK5	40S ribosomal protein S5-like OS=Gossypium hirsutum OX=3635 GN=LOC107891217	LOC107891217	23.351	16.497	38.4	10	34	1	0.998	1.12	0.881	1.151	0.904	0.987	1.171	0.061123
A0A1U8HZL3	splicing factor 3B subunit 3-like OS=Gossypium hirsutum OX=3635 GN=LOC107891227	LOC107891227	151.55	2.1807	1.5	2	2	2	1.079	1.068	0.963	0.881	0.942	1.091	1.019	0.85236
A0A1U8HZM3	Eukaryotic translation initiation factor 3 subunit C OS=Gossypium hirsutum OX=3635 GN=LOC107889472	LOC107889472	103.54	13.771	3.9	3	3	3	1.026	1.055	0.951	0.894	0.929	1.18	1.077	0.47096
A0A1U8HZM7	60S ribosomal protein L21-1-like OS=Gossypium hirsutum OX=3635 GN=LOC107891242	LOC107891242	18.753	1.0224	42.1	9	18	1	0.991	0.985	0.921	1.019	0.947	1.177	1.113	0.150223
A0A1U8HZN0	28S ribosomal protein S9, mitochondrial-like OS=Gossypium hirsutum OX=3635 GN=LOC107891244	LOC107891244	41.775	7.4302	11.3	5	6	5	1.003	0.969	1.113	0.961	1.075	0.876	0.879	0.044535
A0A1U8HZN5	Calcium load-activated calcium channel OS=Gossypium hirsutum OX=3635 GN=LOC107891247	LOC107891247	21.373	7.3469	12.9	2	2	2
A0A1U8HZP0	Phosphoinositide phospholipase C OS=Gossypium hirsutum OX=3635 GN=LOC107889062	LOC107889062	67.248	6.0064	8.6	4	5	2	1.161	0.764	1.209	0.687	1.33	0.772	0.601	0.00075517
A0A1U8HZP3	riboflavin synthase-like isoform X2 OS=Gossypium hirsutum OX=3635 GN=LOC107891252	LOC107891252	31.814	6.2679	28.4	8	15	1	0.916	1.131	0.926	1.069	0.917	1.087	1.191	0.00051623
A0A1U8HZP8	probable plastid-lipid-associated protein 13, chloroplastic isoform X1 OS=Gossypium hirsutum OX=3635 GN=LOC107891255	LOC107891255	33.29	10.825	18.8	5	5	5	1.011	1.027	0.997	0.993	1.065	0.918	0.956	0.30528
A0A1U8HZQ7	outer envelope pore protein 16-3, chloroplastic/mitochondrial-like isoform X2 OS=Gossypium hirsutum OX=3635 GN=LOC107891264	LOC107891264	16.913	8.9863	17.7	3	13	3	1.031	1.042	1.02	1.008	0.942	0.94	0.999	0.9799
A0A1U8HZQ8	riboflavin synthase-like isoform X4 OS=Gossypium hirsutum OX=3635 GN=LOC107889498	LOC107889498	32.009	45.993	33.9	9	16	2	0.972	1.076	0.968	1.055	0.955	1	1.082	0.025836
A0A1U8HZR1	protein QUIRKY-like OS=Gossypium hirsutum OX=3635 GN=LOC107891266	LOC107891266	88.884	57.137	21.8	16	27	1
A0A1U8HZS0	OTU domain-containing protein At3g57810-like isoform X2 OS=Gossypium hirsutum OX=3635 GN=LOC107891276	LOC107891276	34.433	1.2605	2.9	1	1	1	1.009	1.121	1.082	0.739	1.089	0.953	0.885	0.33182
A0A1U8HZS9	polygalacturonase inhibitor OS=Gossypium hirsutum OX=3635 GN=LOC107889518	LOC107889518	36.965	81.442	33.3	9	21	9	0.673	1.523	0.679	1.166	0.762	1.386	1.928	0.0017601
A0A1U8HZU3	Serine/threonine-protein phosphatase 2A 55 kDa regulatory subunit B OS=Gossypium hirsutum OX=3635 GN=LOC107889096	LOC107889096	57.368	3.6011	16.6	8	10	2
A0A1U8HZU7	DNA-binding protein SMUBP-2-like OS=Gossypium hirsutum OX=3635 GN=LOC107891290	LOC107891290	71.844	51.675	16.5	8	9	8	0.968	1.006	0.977	1.068	0.92	1.038	1.086	0.03132
A0A1U8HZW7	BetaGal beta-1,3-N-acetylglucosaminyltransferase 2 OS=Gossypium arboreum OX=29729 GN=F383_19367 PE=4 SV=1	LOC107889121	13.36	2.5217	9.6	1	1	1	1.015	0.875	1.091	0.942	1.09	0.973	0.873	0.02602
A0A1U8HZX2	Imidazolonepropionase OS=Gossypium arboreum OX=29729 GN=F383_35151 PE=4 SV=1	LOC107891310	40.262	28.776	44.5	13	41	2	0.599	1.361	0.741	1.118	0.697	1.515	1.961	0.0035811
A0A1U8HZX4	protein N-terminal glutamine amidohydrolase-like OS=Gossypium hirsutum OX=3635 GN=LOC107891316	LOC107891316	25.334	4.6745	12.6	2	4	2	1.186	0.826	1.12	0.842	1.077	0.852	0.745	0.00056227
A0A1U8HZX5	Monopolar spindle 2 OS=Gossypium arboreum OX=29729 GN=F383_19537 PE=4 SV=1	LOC107891309	8.6207	30.154	44.3	3	6	2	0.709	0.965	1.054	1.226	1.097	0.966	1.104	0.528
A0A1U8HZX9	Calcium-transporting ATPase OS=Gossypium hirsutum OX=3635 GN=LOC107891320	LOC107891320	113.56	138.21	16.8	14	23	1
A0A1U8HZY2	transcription initiation factor IIB-2 OS=Gossypium hirsutum OX=3635 GN=LOC107891319	LOC107891319	34.114	36.49	17	5	6	3	1.049	0.893	1.124	0.942	1.087	0.879	0.833	0.0031641
A0A1U8HZY7	Glycerol-3-phosphate dehydrogenase [NAD(+)] OS=Gossypium hirsutum OX=3635 GN=LOC107891323	LOC107891323	51.564	20.589	15.3	5	5	4	1.164	0.743	1.072	0.778	1.316	0.875	0.675	0.0069773
A0A1U8HZZ0	Putative threonine--tRNA ligase 2, cytoplasmic OS=Gossypium arboreum OX=29729 GN=F383_22131 PE=4 SV=1	LOC107891322	13.43	53.181	50.4	5	11	3	1.064	0.904	1.067	0.899	1.225	0.845	0.789	0.0101393
A0A1U8I002	Mediator of RNA polymerase II transcription subunit 23 OS=Theobroma cacao OX=3641 GN=TCM_024522 PE=4 SV=1	LOC107891331	15.568	1.2819	6.4	1	2	1
A0A1U8I010	topless-related protein 1 isoform X2 OS=Gossypium hirsutum OX=3635 GN=LOC107889147	LOC107889147	124.76	6.1649	29.7	29	40	0
A0A1U8I024	E3 SUMO-protein ligase SIZ1-like isoform X2 OS=Gossypium hirsutum OX=3635 GN=LOC107889156	LOC107889156	93.76	3.5655	2.8	2	3	2
A0A1U8I037	ABC transporter B family member 1 OS=Gossypium hirsutum OX=3635 GN=LOC107889594	LOC107889594	148.66	9.0657	15.2	17	19	2	0.994	0.911	1.034	0.922	1.059	1.085	0.945	0.3748
A0A1U8I049	U1 small nuclear ribonucleoprotein 70 kDa-like isoform X2 OS=Gossypium hirsutum OX=3635 GN=LOC107891362	LOC107891362	52.025	14.35	11	6	7	1	0.972	0.833	1.17	0.96	1.101	0.94	0.843	0.072623
A0A1U8I073	protein disulfide-isomerase 5-2-like OS=Gossypium hirsutum OX=3635 GN=LOC107891382	LOC107891382	48.444	7.2687	12.3	4	5	4	1.008	0.927	1.013	1.015	1.018	1.028	0.977	0.53906
A0A1U8I077	Carboxypeptidase OS=Gossypium hirsutum OX=3635 GN=LOC107891385	LOC107891385	52.462	32.309	18.9	8	13	4	0.72	1.365	0.724	1.4	0.607	1.353	2.008	0.00028195
A0A1U8I078	protein YLS9-like OS=Gossypium hirsutum OX=3635 GN=LOC107891384	LOC107891384	28.354	0.92106	3.2	1	1	1
A0A1U8I079	protein-tyrosine-phosphatase PTP1 isoform X2 OS=Gossypium hirsutum OX=3635 GN=LOC107891375	LOC107891375	38.977	17.396	15.9	5	7	1	0.989	0.985	0.966	1.078	0.943	1.067	1.08	0.073318
A0A1U8I087	E3 ubiquitin-protein ligase RING1-like OS=Gossypium hirsutum OX=3635 GN=LOC107891393	LOC107891393	34.486	12.481	3.5	1	1	1	1.09	1.006	1.072	0.917	1.017	0.887	0.884	0.044662
A0A1U8I093	xanthine dehydrogenase 1-like isoform X2 OS=Gossypium hirsutum OX=3635 GN=LOC107891396	LOC107891396	138.14	27.157	3.3	3	3	3	1.005	0.988	1.021	0.986	1.037	0.969	0.961	0.021839
A0A1U8I099	aldo-keto reductase family 4 member C8-like OS=Gossypium hirsutum OX=3635 GN=LOC107889640	LOC107889640	34.86	82.983	48.9	15	26	3	1.042	0.928	1.078	0.91	1.09	0.921	0.86	0.00050163
A0A1U8I0C2	armadillo repeat-containing protein 8-like isoform X1 OS=Gossypium hirsutum OX=3635 GN=LOC107891401	LOC107891401	72.098	1.4273	1.4	1	1	1
A0A1U8I0C4	calcium-dependent protein kinase 7-like OS=Gossypium hirsutum OX=3635 GN=LOC107891408	LOC107891408	59.847	8.4372	19.8	9	13	1	0.992	0.918	0.928	1.015	1.092	1.073	0.998	0.9792
A0A1U8I0C8	Protein CREG2 OS=Gossypium arboreum OX=29729 GN=F383_08169 PE=4 SV=1	LOC107891411	36.051	30.887	25.5	8	12	2	0.789	1.154	0.829	1.244	0.758	1.26	1.54	0.00033651
A0A1U8I0E2	10 kDa chaperonin-like OS=Gossypium hirsutum OX=3635 GN=LOC107889268	LOC107889268	10.656	2.7661	61.9	6	20	1	1.08	0.897	1.099	0.928	1.118	0.85	0.811	0.00157865
A0A1U8I0E3	exosome complex component RRP45B-like OS=Gossypium hirsutum OX=3635 GN=LOC107891422	LOC107891422	33.664	6.3345	7.5	2	2	2	1.031	1.01	0.988	0.946	0.985	1.057	1.003	0.95394
A0A1U8I0E6	caffeic acid 3-O-methyltransferase 1-like OS=Gossypium hirsutum OX=3635 GN=LOC107891421	LOC107891421	38.962	90.587	42.9	14	23	8	0.488	1.712	0.521	1.322	0.464	1.62	3.16	0.000179573
A0A1U8I0G0	THUMP domain-containing protein 1-like OS=Gossypium hirsutum OX=3635 GN=LOC107891433	LOC107891433	42.279	15.79	16.6	5	5	5	0.961	1.023	0.946	1.043	0.961	1.1	1.104	0.0116152
A0A1U8I0G8	ABC transporter F family member 4-like OS=Gossypium hirsutum OX=3635 GN=LOC107891442	LOC107891442	80.799	9.7691	14.2	7	9	2	0.972	1.076	1.035	1.036	0.907	0.994	1.066	0.21916
A0A1U8I0I1	Cysteine proteinase inhibitor OS=Gossypium hirsutum OX=3635 GN=LOC107891454	LOC107891454	11.395	14.171	58.3	7	12	1	0.339	1.469	0.429	1.907	0.492	1.6	3.949	0.00049526
A0A1U8I0I8	feruloyl CoA ortho-hydroxylase 1-like OS=Gossypium hirsutum OX=3635 GN=LOC107891457	LOC107891457	40.334	19.652	19.9	6	10	6	0.53	1.468	0.525	1.505	0.495	1.582	2.939	1.9533e-06
A0A1U8I0J1	10 kDa chaperonin-like OS=Gossypium hirsutum OX=3635 GN=LOC107891462	LOC107891462	10.684	46.359	59.8	6	20	1	1.021	1.038	1.108	0.89	1.016	0.919	0.905	0.138322
A0A1U8I0J7	Octanoyltransferase OS=Gossypium arboreum OX=29729 GN=F383_00866 PE=4 SV=1	LOC107891463	13.022	43.365	59.3	7	8	7	0.989	1.015	0.993	1.017	1.043	0.885	0.964	0.4805
A0A1U8I0K4	phosphoribosylaminoimidazole carboxylase, chloroplastic-like OS=Gossypium hirsutum OX=3635 GN=LOC107889325	LOC107889325	59.163	37.425	27.7	14	22	3	1.025	1.055	0.999	0.999	0.987	0.946	0.996	0.89872
A0A1U8I0K5	ras-related protein RABE1a isoform X2 OS=Gossypium hirsutum OX=3635 GN=LOC107889712	LOC107889712	23.801	9.7236	54.2	14	29	2	1.143	0.891	1.171	0.832	1.131	0.785	0.728	0.00110434
A0A1U8I0L3	G-rich sequence factor 1-like isoform X2 OS=Gossypium hirsutum OX=3635 GN=LOC107889333	LOC107889333	29.32	1.2048	3.1	1	1	1
A0A1U8I0L9	protein GPR107-like OS=Gossypium hirsutum OX=3635 GN=LOC107889725	LOC107889725	50.101	14.865	10	4	6	4	1.038	1.058	0.94	1	0.95	1.016	1.05	0.2382
A0A1U8I0M4	protein MODIFIER OF SNC1 11-like OS=Gossypium hirsutum OX=3635 GN=LOC107889729	LOC107889729	19.541	32.108	42.5	6	8	6	0.969	1.132	0.962	1.044	0.985	0.991	1.086	0.108125
A0A1U8I0M8	Proteasome subunit alpha type OS=Gossypium hirsutum OX=3635 GN=LOC107891482	LOC107891482	27.399	12.097	62.2	14	34	0
A0A1U8I0P4	General transcription factor IIH subunit OS=Gossypium hirsutum OX=3635 GN=LOC107891493	LOC107891493	44.008	0.97468	1.8	1	1	1
A0A1U8I0P6	isovaleryl-CoA dehydrogenase, mitochondrial OS=Gossypium hirsutum OX=3635 GN=LOC107891492	LOC107891492	44.776	73.403	35.7	12	26	2
A0A1U8I0R0	protein FAR1-RELATED SEQUENCE 11 OS=Gossypium hirsutum OX=3635 GN=LOC107891509	LOC107891509	77.909	-2	1.2	1	1	1	0.978	1.013	0.934	1.036	0.944	1.13	1.113	0.042343
A0A1U8I0R9	tryptophan--tRNA ligase, cytoplasmic OS=Gossypium hirsutum OX=3635 GN=LOC107891513	LOC107891513	45.858	120.72	51.4	16	30	16	1.002	0.957	1.019	0.958	1.075	1.001	0.942	0.0823
A0A1U8I0T6	Copper ion binding isoform 1 OS=Theobroma cacao OX=3641 GN=TCM_041383 PE=4 SV=1	LOC107891528	12.223	29.115	41.2	3	9	3	1.021	1.017	1.097	0.937	1.111	0.829	0.862	0.080096
A0A1U8I0U2	Superoxide dismutase [Cu-Zn] OS=Gossypium hirsutum OX=3635 GN=LOC107891526	LOC107891526	13.049	12.039	50.4	5	20	2	1.296	0.717	1.261	0.674	1.336	0.612	0.515	0.000164648
A0A1U8I0U7	RuvB-like helicase OS=Gossypium hirsutum OX=3635 GN=LOC107891536	LOC107891536	50.119	100.16	37.3	14	22	1	1.082	0.889	1.086	0.939	0.971	1.03	0.91	0.170464
A0A1U8I0V3	Imidazolonepropionase OS=Gossypium arboreum OX=29729 GN=F383_35151 PE=4 SV=1	LOC107889403	40.218	171.48	44.5	13	41	2	0.599	1.4	0.641	1.16	0.643	1.824	2.328	0.0034172
A0A1U8I0W2	Calcium-transporting ATPase OS=Gossypium hirsutum OX=3635 GN=LOC107889412	LOC107889412	113.52	1.5482	17	14	22	1
A0A1U8I0Z8	protein SUPPRESSOR OF K(+) TRANSPORT GROWTH DEFECT 1 OS=Gossypium hirsutum OX=3635 GN=LOC107891581	LOC107891581	48.497	56.812	40.2	13	28	0
A0A1U8I103	lysosomal Pro-X carboxypeptidase-like OS=Gossypium hirsutum OX=3635 GN=LOC107891586	LOC107891586	55.937	17.726	8.4	4	10	4	1.004	0.929	1.025	1.067	0.867	1.147	1.085	0.3763
A0A1U8I117	asparagine synthetase [glutamine-hydrolyzing] 1-like OS=Gossypium hirsutum OX=3635 GN=LOC107891603	LOC107891603	65.531	147.65	31.2	16	28	3	1.184	0.89	0.982	0.874	1.06	1.04	0.869	0.144135
A0A1U8I119	PHD finger-like domain-containing protein 5B OS=Gossypium hirsutum OX=3635 GN=LOC107891610	LOC107891610	12.414	25.222	76.4	8	11	8	0.976	1.025	1.058	0.998	1.039	0.949	0.967	0.37316
A0A1U8I136	Peptidyl-prolyl cis-trans isomerase OS=Gossypium hirsutum OX=3635 GN=LOC107891621	LOC107891621	22.202	1.4991	40.6	8	22	0
A0A1U8I153	AP-2 complex subunit alpha OS=Gossypium hirsutum OX=3635 GN=LOC107891639	LOC107891639	114.43	269.3	38.7	35	59	3	0.948	1.014	0.943	1.001	0.967	1.066	1.078	0.022304
A0A1U8I175	Lactoylglutathione lyase OS=Gossypium hirsutum OX=3635 GN=LOC107891656	LOC107891656	26.658	75.589	55.1	12	24	4	1.147	0.89	1.171	0.896	1.122	0.7	0.723	0.056382
A0A1U8I188	pyrophosphate-energized vacuolar membrane proton pump-like OS=Gossypium hirsutum OX=3635 GN=LOC107891667	LOC107891667	80.438	2.3011	14.1	12	27	1
A0A1U8I191	glucose--fructose oxidoreductase-like isoform X1 OS=Gossypium hirsutum OX=3635 GN=LOC107889939 PE=4 SV=1	LOC107889939	38.313	23.076	22.2	8	11	8	0.927	1.16	0.852	1.105	0.889	1.146	1.278	0.00097779
A0A1U8I197	methyl-CpG-binding domain-containing protein 11-like OS=Gossypium hirsutum OX=3635 GN=LOC107891676	LOC107891676	30.729	53.793	35.5	6	15	3	0.962	1.021	1.113	0.954	1.041	0.9	0.923	0.2241
A0A1U8I1A3	CDK5RAP3-like protein OS=Gossypium hirsutum OX=3635 GN=LOC107889512	LOC107889512	63.57	27.838	18.9	10	14	2
A0A1U8I1B4	Histone H2A OS=Gossypium hirsutum OX=3635 GN=LOC107891684	LOC107891684	13.994	9.7936	35.6	5	11	4	1.197	0.885	1.133	0.929	0.935	0.879	0.825	0.071381
A0A1U8I1C1	T-complex protein 1 subunit eta OS=Gossypium hirsutum OX=3635 GN=LOC107889981	LOC107889981	60.137	1.9191	53	25	63	1	1.029	0.97	0.975	1.097	0.99	0.951	1.008	0.90208
A0A1U8I1D3	MAR-binding filament-like protein 1-1 OS=Gossypium hirsutum OX=3635 GN=LOC107891697	LOC107891697	87.075	4.7179	4.5	4	4	4	0.924	1.07	1.033	1.02	1.005	0.962	1.03	0.54452
A0A1U8I1D5	syntaxin-132-like OS=Gossypium hirsutum OX=3635 GN=LOC107891693	LOC107891693	35.334	1.6855	12	4	5	2
A0A1U8I1E0	heat shock 70 kDa protein 15-like OS=Gossypium hirsutum OX=3635 GN=LOC107891701	LOC107891701	94.618	323.31	52.9	42	116	4	1.042	0.971	1.007	1.036	0.992	1.024	0.997	0.8948
A0A1U8I1E9	protein PAF1 homolog OS=Gossypium hirsutum OX=3635 GN=LOC107891711	LOC107891711	75.532	23.017	16.6	9	12	9	1.034	0.89	1.136	0.998	1.066	0.797	0.83	0.054498
A0A1U8I1F0	1-acyl-sn-glycerol-3-phosphate acyltransferase 2-like OS=Gossypium hirsutum OX=3635 GN=LOC107889540	LOC107889540	43.492	4.9303	19.9	6	8	1
A0A1U8I1F1	sister chromatid cohesion protein PDS5 homolog A-like OS=Gossypium hirsutum OX=3635 GN=LOC107890019	LOC107890019	179.17	27.308	10	16	18	11	1.135	0.839	1.111	0.941	1.017	0.942	0.834	0.023622
A0A1U8I1F5	zinc finger CCCH domain-containing protein 30-like OS=Gossypium hirsutum OX=3635 GN=LOC107889544	LOC107889544	75.171	34.665	11.2	6	8	2
A0A1U8I1G4	ubiquitin carboxyl-terminal hydrolase 6-like OS=Gossypium hirsutum OX=3635 GN=LOC107891720	LOC107891720	54.328	212.16	38.9	15	28	15	1.034	0.951	1.015	0.966	1.039	1.017	0.95	0.074504
A0A1U8I1H5	nuclear pore complex protein NUP107 OS=Gossypium hirsutum OX=3635 GN=LOC107891730	LOC107891730	123.34	4.7266	4	5	6	5	0.995	0.955	1.007	0.915	1.003	1.133	0.999	0.94612
A0A1U8I1I5	probable carboxylesterase 15 OS=Gossypium hirsutum OX=3635 GN=LOC107890065	LOC107890065	26.481	0.92262	4.6	1	1	1	0.918	0.995	1.034	1.124	1.033	0.902	1.012	0.90554
A0A1U8I1J8	peroxisomal (S)-2-hydroxy-acid oxidase-like OS=Gossypium hirsutum OX=3635 GN=LOC107891743	LOC107891743	40.456	11.182	27.2	9	19	4	0.897	1.181	0.827	1.203	0.929	1.138	1.328	0.00172427
A0A1U8I1K9	cyclin-T1-5-like isoform X1 OS=Gossypium hirsutum OX=3635 GN=LOC107891752	LOC107891752	67.172	3.2379	3	2	2	2	1.027	0.95	1.044	0.985	1.015	0.98	0.945	0.0149624
A0A1U8I1N6	syntaxin-61-like OS=Gossypium hirsutum OX=3635 GN=LOC107891772	LOC107891772	27.614	4.6803	7.8	2	4	1	1.156	0.876	1.166	0.652	1.249	0.844	0.664	0.0122429
A0A1U8I1P6	probable LRR receptor-like serine/threonine-protein kinase At1g05700 OS=Gossypium hirsutum OX=3635 GN=LOC107891778	LOC107891778	68.05	2.8134	4.8	3	3	3	0.93	1.038	0.886	1.124	0.913	1.162	1.218	0.0056808
A0A1U8I1Q4	WD repeat-containing protein 44-like OS=Gossypium hirsutum OX=3635 GN=LOC107890144	LOC107890144	47.494	1.3752	0.8	1	2	1	0.972	1.038	0.935	1.109	0.939	1.04	1.12	0.0106647
A0A1U8I1Q9	Threonine dehydratase OS=Gossypium hirsutum OX=3635 GN=LOC107890152	LOC107890152	65.83	41.355	19	9	11	3	0.842	1.115	0.931	1.183	0.894	1.088	1.27	0.0033772
A0A1U8I1R7	AB hydrolase superfamily protein YfhM-like OS=Gossypium hirsutum OX=3635 GN=LOC107891787	LOC107891787	35.389	38.981	32.2	10	19	2	1.008	0.881	1.026	1.089	0.971	1.036	1	0.9611
A0A1U8I1W7	enhancer of mRNA-decapping protein 4-like isoform X2 OS=Gossypium hirsutum OX=3635 GN=LOC107891829	LOC107891829	150.47	19.472	13.8	16	21	1
A0A1U8I1Y5	tRNA (guanine-N(7)-)-methyltransferase OS=Gossypium hirsutum OX=3635 GN=LOC107891848	LOC107891848	29.128	-2	4.3	1	1	1
A0A1U8I202	Kinesin-like protein OS=Gossypium hirsutum OX=3635 GN=LOC107891862	LOC107891862	100.83	26.41	11.3	8	9	3	1.014	0.994	1.053	0.939	1.027	0.973	0.939	0.034582
A0A1U8I205	trafficking protein particle complex subunit 4-like isoform X2 OS=Gossypium hirsutum OX=3635 GN=LOC107889687	LOC107889687	15.468	27.795	42.6	5	7	3	0.961	1.094	1.019	0.901	0.964	1.024	1.025	0.72916
A0A1U8I213	bifunctional 3-dehydroquinate dehydratase/shikimate dehydrogenase, chloroplastic-like OS=Gossypium hirsutum OX=3635 GN=LOC107891874	LOC107891874	58.198	31.236	30.4	16	29	4	1.03	1.015	1.053	0.944	0.956	1.008	0.976	0.56
A0A1U8I234	Arginine biosynthesis bifunctional protein ArgJ, chloroplastic OS=Gossypium hirsutum OX=3635 GN=LOC107889708	LOC107889708	48.947	22.458	17.8	8	10	3	1.111	0.883	1.079	0.922	1.123	0.855	0.803	0.00090438
A0A1U8I242	60S ribosomal protein L14-2-like OS=Gossypium hirsutum OX=3635 GN=LOC107891895	LOC107891895	15.491	3.8203	47	7	19	0
A0A1U8I250	3-isopropylmalate dehydratase large subunit-like isoform X1 OS=Gossypium hirsutum OX=3635 GN=LOC107891890	LOC107891890	55.463	22.765	22.9	12	16	8	0.598	1.479	0.606	1.362	0.623	1.474	2.362	4.1448e-06
A0A1U8I256	glutathione S-transferase L3-like OS=Gossypium hirsutum OX=3635 GN=LOC107889730	LOC107889730	26.87	10.831	39.2	10	28	2	0.516	1.562	0.544	1.4	0.568	1.599	2.802	3.5782e-05
A0A1U8I260	electron transfer flavoprotein subunit beta, mitochondrial-like OS=Gossypium hirsutum OX=3635 GN=LOC107891898	LOC107891898	27.344	9.2248	41.4	10	19	2	0.876	1.065	0.963	1.086	0.861	1.201	1.241	0.0132582
A0A1U8I261	universal stress protein A-like protein OS=Gossypium hirsutum OX=3635 GN=LOC107891919	LOC107891919	17.849	6.4148	22.2	2	2	2	1.006	0.877	1.158	1.072	1.069	0.79	0.847	0.154863
A0A1U8I264	40S ribosomal protein S3a OS=Gossypium hirsutum OX=3635 GN=LOC107891915	LOC107891915	29.753	45.4	60.3	14	49	1	1.144	0.825	1.033	1.025	0.818	1.176	1.01	0.95058
A0A1U8I265	ureidoglycolate hydrolase-like OS=Gossypium hirsutum OX=3635 GN=LOC107891907	LOC107891907	51.899	-2	22.7	8	9	1
A0A1U8I273	glutathione S-transferase U8-like OS=Gossypium hirsutum OX=3635 GN=LOC107889737	LOC107889737	24.752	5.935	15.2	3	3	2	0.844	1.188	0.874	1.018	1.005	1.123	1.223	0.044636
A0A1U8I274	universal stress protein YxiE-like OS=Gossypium hirsutum OX=3635 GN=LOC107891918	LOC107891918	17.857	9.8999	15.9	2	4	2	0.94	1.117	0.894	1.167	0.918	1.023	1.202	0.011579
A0A1U8I278	Peptidylprolyl isomerase OS=Gossypium hirsutum OX=3635 GN=LOC107889741	LOC107889741	70.351	70.636	24.7	14	19	1
A0A1U8I295	probable peroxygenase 3 OS=Gossypium hirsutum OX=3635 GN=LOC107891938	LOC107891938	27.175	3.3235	10.5	2	2	2	0.883	1.288	0.961	1.145	0.779	0.998	1.308	0.049365
A0A1U8I299	enhancer of mRNA-decapping protein 4-like OS=Gossypium hirsutum OX=3635 GN=LOC107891943	LOC107891943	147.43	31.118	17.5	20	26	4	1.032	0.915	1.148	0.907	1.066	0.909	0.841	0.032285
A0A1U8I2A2	glycerol-3-phosphate 2-O-acyltransferase 6-like OS=Gossypium hirsutum OX=3635 GN=LOC107889764	LOC107889764	55.527	3.1223	2.8	1	2	1	0.978	1.098	1.044	0.953	0.988	0.95	0.997	0.92936
A0A1U8I2A6	probable voltage-gated potassium channel subunit beta isoform X1 OS=Gossypium hirsutum OX=3635 GN=LOC107891954	LOC107891954	36.652	4.9083	51.5	18	59	1	1.089	0.985	1.131	0.869	1.094	0.821	0.807	0.0169954
A0A1U8I2B8	protein phosphatase 2C 70-like OS=Gossypium hirsutum OX=3635 GN=LOC107891969	LOC107891969	64.54	15.109	12.4	6	6	6	1.085	0.888	1.005	0.981	1.103	0.928	0.876	0.03114
A0A1U8I2D0	nudC domain-containing protein 2-like OS=Gossypium hirsutum OX=3635 GN=LOC107891963	LOC107891963	18.216	32.239	35.4	4	5	4	1.078	0.943	1.093	0.881	1.14	0.837	0.804	0.0046412
A0A1U8I2K8	cytochrome P450 CYP736A12-like OS=Gossypium hirsutum OX=3635 GN=LOC107892025	LOC107892025	55.862	190.17	30.7	15	26	15	0.374	1.978	0.461	1.448	0.373	1.513	4.089	0.00030333
A0A1U8I2L3	cleavage stimulating factor 64-like OS=Gossypium hirsutum OX=3635 GN=LOC107892032	LOC107892032	42.753	7.5838	9.4	3	3	3	1.038	0.87	1.172	0.911	1.211	0.749	0.74	0.0159199
A0A1U8I2M3	hypersensitive-induced response protein 4 OS=Gossypium hirsutum OX=3635 GN=LOC107892040	LOC107892040	32.523	34.458	34	9	14	7	1.079	0.959	1.043	0.896	1.078	0.938	0.873	0.004002
A0A1U8I2M5	Peptidylprolyl isomerase OS=Gossypium hirsutum OX=3635 GN=LOC107890513	LOC107890513	63.137	5.6132	13.1	7	10	3	0.633	1.183	0.652	1.344	0.654	1.696	2.178	0.0185431
A0A1U8I2M8	ATP-dependent Clp protease ATP-binding subunit CLPT1, chloroplastic-like OS=Gossypium hirsutum OX=3635 GN=LOC107892044	LOC107892044	25.496	27.253	30.4	6	10	4	0.761	1.03	1.026	1.17	1.015	1.011	1.146	0.25538
A0A1U8I2M9	Putative C11E10.04, mitochondrial OS=Gossypium arboreum OX=29729 GN=F383_21139 PE=4 SV=1	LOC107892033	77.006	3.0891	2.8	2	2	2
A0A1U8I2N6	40S ribosomal protein S7 OS=Gossypium hirsutum OX=3635 GN=LOC107892035	LOC107892035	22.066	0.92745	30.4	5	11	1	0.782	1.072	1.116	1.119	1.042	0.874	1.043	0.7393
A0A1U8I2Q8	membrane steroid-binding protein 2-like OS=Gossypium hirsutum OX=3635 GN=LOC107892070	LOC107892070	22.692	4.1298	29.7	5	9	2	1.124	0.926	0.912	0.983	1.135	0.919	0.892	0.21374
A0A1U8I2S0	Aldose 1-epimerase OS=Gossypium hirsutum OX=3635 GN=LOC107892067	LOC107892067	36.674	107.44	43.5	12	29	3	1.044	0.861	1.079	0.935	1.151	0.908	0.826	0.0069829
A0A1U8I2U3	DNA-directed RNA polymerase III subunit RPC3-like OS=Gossypium hirsutum OX=3635 GN=LOC107892078	LOC107892078	58.845	5.8242	7.2	4	4	4	0.993	0.973	1.048	1.053	0.883	1.072	1.06	0.3683
A0A1U8I2Y2	AMSH-like ubiquitin thioesterase 3 OS=Gossypium hirsutum OX=3635 GN=LOC107892102	LOC107892102	57.189	17.055	12	6	6	6	0.945	1.086	0.945	1.086	0.978	1.052	1.124	0.00168448
A0A1U8I2Y8	glucan endo-1,3-beta-glucosidase, basic vacuolar isoform-like OS=Gossypium hirsutum OX=3635 GN=LOC107892119	LOC107892119	39.693	34.802	11.1	4	7	4	0.55	1.851	0.536	1.098	0.466	1.603	2.933	0.0030008
A0A1U8I2Z1	aspartic proteinase-like protein 2 OS=Gossypium hirsutum OX=3635 GN=LOC107890038	LOC107890038	46.398	3.1418	2.3	1	1	1	0.909	1.172	1.018	0.976	0.846	1.12	1.179	0.099959
A0A1U8I2Z3	nuclear pore complex protein GP210-like isoform X1 OS=Gossypium hirsutum OX=3635 GN=LOC107892125	LOC107892125	214.15	28.602	6.4	12	13	12	0.721	1.263	0.77	1.168	0.776	1.418	1.698	0.00098384
A0A1U8I2Z5	40S ribosomal protein S17-like OS=Gossypium hirsutum OX=3635 GN=LOC107892121	LOC107892121	15.303	10.57	35.1	6	17	1	0.927	1.102	1.014	1.128	0.866	1.069	1.175	0.027662
A0A1U8I304	Sucrase/ferredoxin-like family protein, putative isoform 1 OS=Theobroma cacao OX=3641 GN=TCM_016974 PE=4 SV=1	LOC107892129	38.567	32.362	12.5	4	9	2	1.312	0.821	1.133	0.666	1.252	0.813	0.622	0.0040995
A0A1U8I312	heterogeneous nuclear ribonucleoprotein 1-like isoform X2 OS=Gossypium hirsutum OX=3635 GN=LOC107892127	LOC107892127	36.666	1.5029	27.6	8	14	1
A0A1U8I325	probable ADP-ribosylation factor GTPase-activating protein AGD9 isoform X1 OS=Gossypium hirsutum OX=3635 GN=LOC107890612	LOC107890612	44.363	21.495	21.5	8	12	5	0.792	1.075	0.983	1.213	0.935	1.043	1.229	0.059645
A0A1U8I343	sulfite oxidase-like OS=Gossypium hirsutum OX=3635 GN=LOC107892161	LOC107892161	43.335	3.4351	33.1	11	14	1
A0A1U8I353	Uridine kinase OS=Gossypium hirsutum OX=3635 GN=LOC107892169	LOC107892169	52.377	92.586	38.2	14	20	5	1.073	0.981	1.053	0.883	1.085	0.929	0.87	0.0113576
A0A1U8I362	COP9 signalosome complex subunit 3-like isoform X1 OS=Gossypium hirsutum OX=3635 GN=LOC107892179	LOC107892179	48.055	61.254	25.5	11	20	9	1.081	0.926	1.056	0.935	1.036	0.975	0.894	0.0049629
A0A1U8I371	cytochrome c1-2, heme protein, mitochondrial isoform X2 OS=Gossypium hirsutum OX=3635 GN=LOC107892181	LOC107892181	33.478	119.49	46.6	10	30	10	1.01	1.018	1.009	0.997	0.97	1.042	1.023	0.28904
A0A1U8I389	Glyceraldehyde-3-phosphate dehydrogenase OS=Gossypium hirsutum OX=3635 GN=LOC107892188	LOC107892188	36.558	112.32	65.2	22	115	0
A0A1U8I398	Serine/threonine protein phosphatase 2A regulatory subunit OS=Gossypium hirsutum OX=3635 GN=LOC107892196	LOC107892196	60.065	12.636	17.2	9	11	2
A0A1U8I3A3	Disease resistance protein OS=Theobroma cacao OX=3641 GN=TCM_017362 PE=4 SV=1	LOC107892200	56.15	10.446	15.2	6	7	1	1.038	0.929	0.928	1.105	0.908	1.126	1.1	0.27708
A0A1U8I3B2	probable serine/threonine-protein kinase At5g41260 OS=Gossypium hirsutum OX=3635 GN=LOC107890685	LOC107890685	54.473	14.574	22.3	11	15	3	0.884	1.151	0.875	1.116	0.835	1.155	1.319	0.00017942
A0A1U8I3B6	uncharacterized membrane protein At3g27390-like isoform X2 OS=Gossypium hirsutum OX=3635 GN=LOC107892215	LOC107892215	59.597	2.5086	3	2	2	2	1.224	0.938	1.126	0.771	1.197	0.685	0.675	0.0134615
A0A1U8I3B7	mini zinc finger protein 2-like OS=Gossypium hirsutum OX=3635 GN=LOC107890199	LOC107890199	11.463	42.368	34.3	2	3	2	0.887	0.944	1.063	1.044	1.07	0.998	0.989	0.90688
A0A1U8I3F1	glucuronokinase 1-like OS=Gossypium hirsutum OX=3635 GN=LOC107892244	LOC107892244	40.229	9.8302	18	6	6	6	1.081	1.03	1.055	0.918	0.911	1.013	0.972	0.69548
A0A1U8I3G9	cannabidiolic acid synthase-like OS=Gossypium hirsutum OX=3635 GN=LOC107890732	LOC107890732	60.675	1.4517	5.2	3	5	1	0.748	1.287	0.739	1.496	0.703	1.139	1.791	0.0020625
A0A1U8I3H5	polyribonucleotide nucleotidyltransferase 2, mitochondrial-like OS=Gossypium hirsutum OX=3635 GN=LOC107892267	LOC107892267	107.31	60.147	16.7	12	13	5	1.07	0.917	1.061	0.926	1.073	0.94	0.869	5.9878e-05
A0A1U8I3I4	Isocitrate dehydrogenase [NADP] OS=Gossypium hirsutum OX=3635 GN=LOC107892269	LOC107892269	52.714	43.458	40.4	17	39	5	0.78	0.929	0.75	1.11	0.969	1.716	1.503	0.129118
A0A1U8I3J1	Serine/arginine repetitive matrix protein 2, putative OS=Theobroma cacao OX=3641 GN=TCM_012023 PE=4 SV=1	LOC107892275	17.771	2.1956	11.9	2	2	2	1.091	0.887	1.039	0.93	1.096	0.944	0.856	0.0035808
A0A1U8I3J9	Putative threonine--tRNA ligase 2, cytoplasmic OS=Gossypium arboreum OX=29729 GN=F383_22131 PE=4 SV=1	LOC107890318	11.672	7.0227	45.6	4	11	2	1.122	0.92	1.078	0.913	1.026	0.843	0.83	0.0079806
A0A1U8I3Q1	paired amphipathic helix protein Sin3-like 2 isoform X4 OS=Gossypium hirsutum OX=3635 GN=LOC107892315	LOC107892315	146.38	7.8923	1.4	2	3	2	1.065	1.01	1.078	0.983	0.967	0.893	0.928	0.2138
A0A1U8I3S0	Starch synthase, chloroplastic/amyloplastic OS=Gossypium hirsutum OX=3635 GN=LOC107890446	LOC107890446	83.649	24.524	6.2	5	5	2	1.106	0.902	1.058	0.903	1.157	0.846	0.798	0.0025959
A0A1U8I3T0	Transmembrane protein OS=Arabidopsis thaliana OX=3702 GN=At3g28720 PE=4 SV=1	LOC107892335	75.499	46.102	8.4	5	8	5	0.896	1.143	0.974	1.047	0.914	1.095	1.18	0.0097787
A0A1U8I3U0	Plasma membrane ATPase OS=Gossypium hirsutum OX=3635 GN=LOC107892346	LOC107892346	97.479	6.7527	41.1	33	74	2	0.952	1.074	0.992	0.984	0.96	1.065	1.075	0.07784
A0A1U8I3U5	Thioredoxin OS=Gossypium hirsutum OX=3635 GN=LOC107892347	LOC107892347	14.814	7.6777	21.6	3	5	2	1.282	0.976	1.058	0.957	0.954	0.748	0.814	0.1668
A0A1U8I3V7	Plasma membrane ATPase OS=Gossypium hirsutum OX=3635 GN=LOC107892354	LOC107892354	91.244	94.046	44.1	33	77	0
A0A1U8I3Y2	Alpha-1,4 glucan phosphorylase OS=Gossypium hirsutum OX=3635 GN=LOC107892378	LOC107892378	94.44	135.5	34.7	26	35	6	1.052	0.997	0.979	1.028	1.072	0.819	0.917	0.2978
A0A1U8I3Y5	ARF guanine-nucleotide exchange factor GNL1-like isoform X2 OS=Gossypium hirsutum OX=3635 GN=LOC107890479	LOC107890479	163.02	7.3863	1.9	3	4	2	0.888	0.983	1.067	0.925	0.994	1.163	1.041	0.67968
A0A1U8I3Y7	Biotin carboxyl carrier protein of acetyl-CoA carboxylase OS=Gossypium hirsutum OX=3635 GN=LOC107892382	LOC107892382	30.344	5.4051	18.3	5	13	1	0.896	1.036	1.154	1.185	1.054	0.78	0.967	0.7792
A0A1U8I3Z0	Non-specific serine/threonine protein kinase OS=Gossypium hirsutum OX=3635 GN=LOC107890484	LOC107890484	57.754	41.887	27.9	14	22	4	0.976	1.007	1.004	1.077	0.939	1.057	1.076	0.05828
A0A1U8I3Z2	Sister chromatid cohesion protein OS=Gossypium hirsutum OX=3635 GN=LOC107892383	LOC107892383	185.16	2.7196	0.7	1	1	1	0.912	1.06	0.881	1.152	0.914	1.135	1.236	0.00169898
A0A1U8I3Z9	SURF1-like protein OS=Gossypium hirsutum OX=3635 GN=LOC107890858	LOC107890858	38.89	9.8821	4	1	2	1	1.084	0.93	1.155	0.895	0.937	0.989	0.886	0.159419
A0A1U8I423	soluble inorganic pyrophosphatase-like OS=Gossypium hirsutum OX=3635 GN=LOC107890503	LOC107890503	24.183	15.291	17.2	4	5	2	1.073	0.809	1.145	0.883	1.166	0.885	0.762	0.0021766
A0A1U8I426	30S ribosomal S5 OS=Gossypium arboreum OX=29729 GN=F383_27574 PE=4 SV=1	LOC107890509	95.257	6.715	3.7	3	3	3	0.958	0.978	1.096	0.993	1.079	0.885	0.912	0.174055
A0A1U8I453	apyrase 2-like OS=Gossypium hirsutum OX=3635 GN=LOC107892437	LOC107892437	50.735	70.809	19	8	12	1	0.87	1.213	0.793	1.16	0.781	1.276	1.493	0.00077507
A0A1U8I465	transcription initiation factor TFIID subunit 12 OS=Gossypium hirsutum OX=3635 GN=LOC107892301	LOC107892301	55.59	2.3286	3.8	2	2	2
A0A1U8I467	probable fructokinase-4 OS=Gossypium hirsutum OX=3635 GN=LOC107890543	LOC107890543	35.033	274.67	61	16	58	4	0.878	1.152	0.939	1.051	0.961	1.102	1.19	0.0101415
A0A1U8I489	40S ribosomal protein S4 OS=Gossypium hirsutum OX=3635 GN=LOC107890936	LOC107890936	29.602	1.0514	58	16	59	1	0.94	1.015	0.921	1.037	0.901	1.237	1.191	0.055537
A0A1U8I4A4	probable acyl-activating enzyme 6 OS=Gossypium hirsutum OX=3635 GN=LOC107890571	LOC107890571	61.467	31.616	9.3	4	4	2	1.12	0.872	1.256	0.686	1.168	0.839	0.676	0.00836
A0A1U8I4B6	Dna-directed rna polymerase subunit alpha OS=Gossypium arboreum OX=29729 GN=F383_10401 PE=4 SV=1	LOC107892479	45.116	4.1671	13.4	5	6	2	1.231	0.903	1.144	0.748	1.078	0.853	0.725	0.0088374
A0A1U8I4D8	chaperonin CPN60-2, mitochondrial-like OS=Gossypium hirsutum OX=3635 GN=LOC107890588	LOC107890588	61.42	168.24	61.7	32	117	2	1.05	0.925	1.029	0.982	0.996	0.941	0.926	0.030917
A0A1U8I4F7	Alpha/beta-Hydrolases superfamily protein OS=Theobroma cacao OX=3641 GN=TCM_022567 PE=4 SV=1	LOC107892501	41.619	20.122	22.5	8	11	4	1.109	1.07	1.023	0.854	0.957	0.993	0.944	0.49026
A0A1U8I4I4	Putative E3 ubiquitin-protein ligase XBAT35 OS=Gossypium arboreum OX=29729 GN=F383_03415 PE=4 SV=1	LOC107892564	53.459	4.0508	2.5	1	1	1	0.986	0.879	1.055	0.953	1.078	1.049	0.924	0.23198
A0A1U8I4J1	Acyl-coenzyme A oxidase OS=Gossypium hirsutum OX=3635 GN=LOC107890640	LOC107890640	74.465	57.841	25.5	14	20	7	1.126	0.921	1.076	0.871	1.122	0.873	0.802	0.00069704
A0A1U8I4L3	acid beta-fructofuranosidase-like isoform X2 OS=Gossypium hirsutum OX=3635 GN=LOC107890652	LOC107890652	71.524	4.3744	2.6	2	2	2
A0A1U8I4N2	eukaryotic translation initiation factor 2 subunit alpha-like OS=Gossypium hirsutum OX=3635 GN=LOC107890678	LOC107890678	38.546	6.272	26.5	10	13	2	0.968	0.929	0.989	0.883	1.006	1.253	1.034	0.8616
A0A1U8I4S0	nephrocystin-3-like OS=Gossypium hirsutum OX=3635 GN=LOC107890712	LOC107890712	63.835	2.571	28	14	19	1
A0A1U8I4U0	glucosamine 6-phosphate N-acetyltransferase-like OS=Gossypium hirsutum OX=3635 GN=LOC107892671	LOC107892671	17.789	16.134	29.9	4	4	4	1.137	0.875	1.028	0.908	1.096	0.94	0.835	0.0075008
A0A1U8I4U3	NADH-cytochrome b5 reductase OS=Gossypium hirsutum OX=3635 GN=LOC107891093	LOC107891093	31.227	70.967	42.5	11	24	1	1.263	0.912	1.146	0.83	1.062	0.737	0.714	0.0131428
A0A1U8I4U6	remorin-like OS=Gossypium hirsutum OX=3635 GN=LOC107890738	LOC107890738	20.847	22.043	31.6	6	7	2	1.118	0.777	1.114	0.866	1.275	0.798	0.696	0.0027976
A0A1U8I4W3	Peroxidase OS=Gossypium hirsutum OX=3635 GN=LOC107891116	LOC107891116	37.045	21.956	17	3	3	3	1.182	0.642	1.362	0.662	1.355	0.689	0.511	0.000195224
A0A1U8I4Y2	splicing factor 3A subunit 3-like OS=Gossypium hirsutum OX=3635 GN=LOC107890768	LOC107890768	59.725	53.413	14.5	7	9	1	1.087	0.877	0.946	1.05	0.964	1.097	1.009	0.94192
A0A1U8I503	aquaporin PIP2-1 OS=Gossypium hirsutum OX=3635 GN=LOC107891130	LOC107891130	30.455	31.448	10.9	3	4	3	0.898	1.094	0.891	1.151	0.802	1.196	1.328	0.0031209
A0A1U8I513	serine/threonine protein phosphatase 2A regulatory subunit B''beta-like OS=Gossypium hirsutum OX=3635 GN=LOC107892744	LOC107892744	62.366	2.24	18.6	10	12	1
A0A1U8I522	cell division cycle protein 48 homolog OS=Gossypium hirsutum OX=3635 GN=LOC107891143	LOC107891143	89.53	323.31	62.1	45	121	3	0.995	0.954	0.921	1.018	0.982	1.119	1.067	0.29398
A0A1U8I570	Nucleotidyl transferase OS=Corchorus capsularis OX=210143 GN=CCACVL1_10574 PE=4 SV=1	LOC107892832	11.865	1.8613	7.5	1	2	1
A0A1U8I574	40S ribosomal protein S13-like OS=Gossypium hirsutum OX=3635 GN=LOC107890823	LOC107890823	17.15	1.8196	53	9	23	1	0.927	1.19	0.969	0.965	0.874	1.121	1.183	0.075622
A0A1U8I5A1	cyclin-dependent kinase D-3-like OS=Gossypium hirsutum OX=3635 GN=LOC107890841	LOC107890841	46.448	3.9444	4.6	2	2	2
A0A1U8I5A6	guanine nucleotide-binding protein subunit beta-like protein OS=Gossypium hirsutum OX=3635 GN=LOC107890848	LOC107890848	36.003	231.56	54.1	15	58	0
A0A1U8I5A7	putative deoxyribonuclease TATDN1 isoform X3 OS=Gossypium hirsutum OX=3635 GN=LOC107891195	LOC107891195	32.646	8.1421	11.3	3	3	3	0.906	1.037	1.058	0.99	0.982	1.044	1.042	0.41638
A0A1U8I5C9	D-lactate dehydrogenase [cytochrome], mitochondrial-like OS=Gossypium hirsutum OX=3635 GN=LOC107891208	LOC107891208	63.432	1.9665	13.9	8	9	1
A0A1U8I5D0	Annexin OS=Gossypium hirsutum OX=3635 GN=LOC107890867	LOC107890867	35.565	82.362	38	11	20	9	1.088	0.928	1.085	0.877	1.112	0.896	0.822	0.00042175
A0A1U8I5F5	TNF receptor-associated factor family protein OS=Gossypium arboreum OX=29729 GN=F383_03033 PE=4 SV=1	LOC107891226	47.964	2.0445	2.1	1	2	1
A0A1U8I5F8	1-deoxy-D-xylulose 5-phosphate reductoisomerase, chloroplastic-like OS=Gossypium hirsutum OX=3635 GN=LOC107890888	LOC107890888	51.213	1.2741	15.6	7	10	1	1.114	0.92	1.073	0.916	1.117	0.833	0.808	0.0035752
A0A1U8I5G4	histone-lysine N-methyltransferase ATXR4-like OS=Gossypium hirsutum OX=3635 GN=LOC107891236	LOC107891236	37.108	3.2272	8.6	3	3	3
A0A1U8I5H0	60S ribosomal protein L21-1-like OS=Gossypium hirsutum OX=3635 GN=LOC107891243	LOC107891243	18.739	-2	39	9	19	0
A0A1U8I5K0	cytochrome b5-like isoform X2 OS=Gossypium hirsutum OX=3635 GN=LOC107892965	LOC107892965	15.55	16.957	32.6	4	5	4	0.94	0.976	0.927	0.919	1.094	1.111	1.015	0.85736
A0A1U8I5M3	Ferritin OS=Gossypium hirsutum OX=3635 GN=LOC107890938	LOC107890938	29.046	1.5632	18.5	4	9	1
A0A1U8I5N0	ERBB-3 BINDING PROTEIN 1-like OS=Gossypium hirsutum OX=3635 GN=LOC107890947	LOC107890947	43.395	110.76	54.6	21	47	2	1.048	1.004	0.917	1.059	0.936	1.069	1.08	0.164436
A0A1U8I5N5	acyl-coenzyme A oxidase 4, peroxisomal-like OS=Gossypium hirsutum OX=3635 GN=LOC107890952	LOC107890952	47.942	158.92	36.1	12	32	9	0.916	1.146	0.913	1.036	0.909	1.12	1.206	0.025942
A0A1U8I5N8	1-acyl-sn-glycerol-3-phosphate acyltransferase 2-like OS=Gossypium hirsutum OX=3635 GN=LOC107891288	LOC107891288	43.545	64.632	25.1	8	10	3
A0A1U8I5P4	Vacuolar cation/proton exchanger OS=Gossypium hirsutum OX=3635 GN=LOC107890965	LOC107890965	48.198	5.4877	6.3	2	2	2	0.769	1.411	0.732	1.388	0.748	1.057	1.715	0.030415
A0A1U8I5P5	TATA-binding protein-associated factor BTAF1-like OS=Gossypium hirsutum OX=3635 GN=LOC107893121	LOC107893121	227.74	4.3111	1.8	4	5	4	1.022	0.958	1.029	0.953	0.999	1.047	0.97	0.3782
A0A1U8I5P7	5-methyltetrahydropteroyltriglutamate-- homocysteine methyltransferase-like OS=Gossypium hirsutum OX=3635 GN=LOC107893151	LOC107893151	84.685	276.36	44.6	37	133	1	0.846	1.123	0.921	1.071	0.879	1.222	1.291	0.0051016
A0A1U8I5Q5	MLO-like protein OS=Gossypium hirsutum OX=3635 GN=LOC107893118	LOC107893118	57.269	60.534	9.7	4	6	4	0.769	1.086	0.925	1.059	1.078	1.127	1.18	0.15288
A0A1U8I5R1	NADH-ubiquinone oxidoreductase chain 2 OS=Gossypium hirsutum OX=3635 GN=LOC107893137	LOC107893137	33.065	11.279	12.5	4	10	4	0.965	1.046	1.011	0.974	1.034	0.992	1.001	0.98434
A0A1U8I5S4	E3 ubiquitin-protein ligase Hakai-like OS=Gossypium hirsutum OX=3635 GN=LOC107890984	LOC107890984	51.604	1.3684	4.9	2	2	2	1.062	0.963	1.027	0.97	0.955	1.033	0.974	0.5438
A0A1U8I5T3	flotillin-like protein 4 OS=Gossypium hirsutum OX=3635 GN=LOC107891325	LOC107891325	53.596	80.114	28.8	13	22	13	0.382	1.703	0.36	1.488	0.294	1.782	4.8	8.071e-05
A0A1U8I5U0	protein SRC1-like isoform X3 OS=Gossypium hirsutum OX=3635 GN=LOC107893147	LOC107893147	17.534	264.94	60.4	9	60	9	0.368	1.738	0.369	1.56	0.437	1.681	4.241	2.2196e-05
A0A1U8I5U3	glutathione S-transferase U8-like OS=Gossypium hirsutum OX=3635 GN=LOC107891002	LOC107891002	25.847	69.325	43.1	11	39	5	0.729	1.311	0.723	1.191	0.79	1.306	1.698	0.00023638
A0A1U8I5X8	Activating signal cointegrator 1 OS=Gossypium arboreum OX=29729 GN=F383_03331 PE=4 SV=1	LOC107893197	38.991	2.9276	10	3	3	1
A0A1U8I5Y1	Trafficking protein particle complex subunit OS=Gossypium hirsutum OX=3635 GN=LOC107891361	LOC107891361	20.831	21.951	33.3	6	9	1	0.977	0.944	1.005	1.004	0.993	1.095	1.023	0.6596
A0A1U8I5Z1	histidinol-phosphate aminotransferase, chloroplastic OS=Gossypium hirsutum OX=3635 GN=LOC107891369	LOC107891369	46.82	2.3204	26.7	8	12	1
A0A1U8I5Z3	Arginine biosynthesis bifunctional protein ArgJ, chloroplastic OS=Gossypium hirsutum OX=3635 GN=LOC107891029	LOC107891029	48.996	13.55	20.4	8	10	3	1.128	0.944	1.09	0.884	1.071	0.86	0.817	0.0030408
A0A1U8I607	histone H1-like OS=Gossypium hirsutum OX=3635 GN=LOC107893211	LOC107893211	22.364	2.1083	12	3	5	1	1.548	0.668	1.162	0.717	1.085	0.739	0.56	0.007278
A0A1U8I626	BnaA02g21550D protein OS=Brassica napus OX=3708 GN=BnaA02g21550D PE=4 SV=1	LOC107891394	52.806	10.6	2.9	1	1	1	0.761	1.201	0.867	1.185	0.819	1.252	1.487	0.00064259
A0A1U8I632	Expansin OS=Gossypium hirsutum OX=3635 GN=LOC107891056	LOC107891056	28.343	4.3559	11.4	2	2	1	0.982	1.134	0.973	0.94	0.97	1.026	1.06	0.41668
A0A1U8I634	calreticulin OS=Gossypium hirsutum OX=3635 GN=LOC107893231	LOC107893231	48.285	3.9828	29.3	11	13	2	0.771	1.221	0.845	1.179	0.754	1.327	1.573	0.00079522
A0A1U8I659	uracil phosphoribosyltransferase-like OS=Gossypium hirsutum OX=3635 GN=LOC107891077	LOC107891077	32.212	42.228	39.2	10	15	1	1.119	0.933	1.108	0.88	1.176	0.741	0.751	0.015203
A0A1U8I660	40S ribosomal protein S2-4-like OS=Gossypium hirsutum OX=3635 GN=LOC107891409	LOC107891409	29.568	28.859	48.9	15	36	1	0.903	1.046	1.007	1.056	0.938	1.081	1.118	0.028396
A0A1U8I670	ABC transporter G family member 13-like isoform X2 OS=Gossypium hirsutum OX=3635 GN=LOC107891418	LOC107891418	77.212	6.3527	4.9	3	3	2	1.173	0.736	1.176	0.756	1.336	0.748	0.608	0.0003411
A0A1U8I672	Transmembrane 9 superfamily member OS=Gossypium hirsutum OX=3635 GN=LOC107891091	LOC107891091	67.623	34.535	10.1	6	12	2	0.988	1.068	0.941	1.027	0.937	1.074	1.106	0.0103591
A0A1U8I673	acyl-CoA-binding domain-containing protein 4-like OS=Gossypium hirsutum OX=3635 GN=LOC107893281	LOC107893281	73.343	12.344	10.9	7	8	5	1.143	0.878	1.24	0.683	1.163	0.835	0.676	0.0078986
A0A1U8I677	UDP-glucose:glycoprotein glucosyltransferase-like OS=Gossypium hirsutum OX=3635 GN=LOC107891097	LOC107891097	185.03	4.7786	13.9	20	27	1	0.83	1.097	0.893	1.087	0.889	1.271	1.323	0.0076808
A0A1U8I679	T31J12.3 protein OS=Arabidopsis thaliana OX=3702 GN=At1g09310 PE=1 SV=1	LOC107893301	18.533	111.31	52.4	8	22	5	1.466	0.497	1.375	0.517	1.544	0.435	0.33	5.8861e-05
A0A1U8I683	60S ribosomal protein L18-2-like OS=Gossypium hirsutum OX=3635 GN=LOC107893287	LOC107893287	20.957	36.395	46.5	9	22	2
A0A1U8I689	RNA-binding protein 8A-like OS=Gossypium hirsutum OX=3635 GN=LOC107891439	LOC107891439	21.912	37.506	26.1	5	6	2	1.133	0.896	1.145	0.881	1.06	0.852	0.788	0.0010951
A0A1U8I691	protein IQ-DOMAIN 1-like OS=Gossypium hirsutum OX=3635 GN=LOC107891112	LOC107891112	49.661	4.9039	7.4	3	5	2	1.172	0.761	1.163	0.681	1.254	0.912	0.656	0.008361
A0A1U8I693	Phosphotransferase OS=Gossypium hirsutum OX=3635 GN=LOC107893309	LOC107893309	54.185	12.163	26.1	10	19	2	0.942	1.052	1.081	0.851	1.075	1	0.937	0.43946
A0A1U8I6A4	Putative E3 ubiquitin-protein ligase HERC1 OS=Gossypium arboreum OX=29729 GN=F383_06438 PE=4 SV=1	LOC107891452	119.97	3.2351	2.8	3	3	3	1.146	0.815	1.219	0.772	1.18	0.808	0.676	8.4643e-05
A0A1U8I6C3	proteasome-associated protein ECM29 homolog isoform X2 OS=Gossypium hirsutum OX=3635 GN=LOC107891466	LOC107891466	188.36	101.14	15.6	22	25	22	0.952	1.046	0.906	1.074	0.908	1.174	1.191	0.0106983
A0A1U8I6D7	Glycylpeptide N-tetradecanoyltransferase OS=Gossypium hirsutum OX=3635 GN=LOC107893337	LOC107893337	49.945	22.85	27.2	8	11	3	1.007	1.019	0.97	1.105	0.892	1.037	1.102	0.088217
A0A1U8I6E4	vacuolar protein sorting-associated protein 32 homolog 2-like OS=Gossypium hirsutum OX=3635 GN=LOC107893321	LOC107893321	24.279	2.6153	39	9	19	1
A0A1U8I6G2	Mediator of RNA polymerase II transcription subunit 20 OS=Gossypium hirsutum OX=3635 GN=LOC107893356	LOC107893356	25.473	2.9647	4.5	1	1	1	0.998	0.932	1.036	1.052	0.936	1.062	1.026	0.65998
A0A1U8I6G4	serine/threonine-protein kinase At5g01020-like OS=Gossypium hirsutum OX=3635 GN=LOC107893363	LOC107893363	49.578	6.5876	7.9	4	7	2	0.734	1.206	0.762	1.283	0.798	1.325	1.663	0.000158832
A0A1U8I6H4	Methylthioribose-1-phosphate isomerase OS=Gossypium hirsutum OX=3635 GN=LOC107893370	LOC107893370	40.92	36.872	26.2	11	20	4	0.847	1.169	0.89	1.161	0.899	1.105	1.303	0.0004953
A0A1U8I6I4	Sucrose synthase OS=Gossypium hirsutum OX=3635 GN=LOC107893375	LOC107893375	92.76	52.431	45.5	37	126	10	0.63	1.445	0.635	1.272	0.626	1.564	2.264	0.0054583
A0A1U8I6I7	NADH dehydrogenase [ubiquinone] 1 alpha subcomplex subunit 12 OS=Gossypium hirsutum OX=3635 GN=LOC107891511	LOC107891511	18.437	46.214	47.8	9	19	9	1.055	0.942	1.107	0.946	1.082	0.827	0.837	0.0177594
A0A1U8I6K3	aspartic proteinase nepenthesin-1-like OS=Gossypium hirsutum OX=3635 GN=LOC107891178	LOC107891178	51.054	155.44	35.1	14	33	5	1.618	0.502	1.428	0.473	1.454	0.457	0.318	1.8931e-05
A0A1U8I6L7	3-oxoacyl-[acyl-carrier-protein] synthase II, chloroplastic-like OS=Gossypium hirsutum OX=3635 GN=LOC107893372	LOC107893372	61.83	19.761	11.6	4	5	1
A0A1U8I6L9	Gb:AAF02129.1, putative OS=Theobroma cacao OX=3641 GN=TCM_041318 PE=4 SV=1	LOC107891539	12.448	3.0647	12.4	1	1	1
A0A1U8I6M9	exosome complex exonuclease RRP46 homolog OS=Gossypium hirsutum OX=3635 GN=LOC107893411	LOC107893411	26.391	11.344	11.2	3	3	3	1.388	0.957	1.21	0.599	1.058	0.72	0.623	0.036397
A0A1U8I6N3	DNA helicase OS=Gossypium hirsutum OX=3635 GN=LOC107893417	LOC107893417	81.104	24.671	12.1	8	10	8	1.084	0.911	1.123	0.889	1.03	0.919	0.84	0.0029836
A0A1U8I6P0	ERBB-3 BINDING PROTEIN 1 OS=Gossypium hirsutum OX=3635 GN=LOC107891559	LOC107891559	43.032	9.2437	44.5	17	38	1	0.947	1.005	0.967	1.054	0.979	1.077	1.084	0.023781
A0A1U8I6P5	fasciclin-like arabinogalactan protein 17 OS=Gossypium hirsutum OX=3635 GN=LOC107891204	LOC107891204	50.269	2.1241	2.8	1	1	1	0.736	1.341	0.856	1.184	0.859	1.105	1.481	0.00676
A0A1U8I6Q0	replication factor C subunit 3 isoform X2 OS=Gossypium hirsutum OX=3635 GN=LOC107891200	LOC107891200	36.751	18.927	20.9	8	11	8	1.205	0.791	1.138	0.801	1.142	0.774	0.679	5.5732e-05
A0A1U8I6Q5	leucine aminopeptidase 1-like isoform X1 OS=Gossypium hirsutum OX=3635 GN=LOC107893437	LOC107893437	54.508	5.9781	44.3	18	56	2	1.033	0.93	0.978	1.013	1.051	0.973	0.952	0.21032
A0A1U8I6Q6	ATP-dependent zinc metalloprotease FTSH 4, mitochondrial-like OS=Gossypium hirsutum OX=3635 GN=LOC107893400	LOC107893400	67.795	20.414	14.6	8	10	2
A0A1U8I6R3	probable sugar phosphate/phosphate translocator At5g25400 OS=Gossypium hirsutum OX=3635 GN=LOC107893443	LOC107893443	38.238	2.3826	3.2	1	1	1	1.196	0.771	1.175	0.668	1.239	0.892	0.646	0.0063823
A0A1U8I6T3	Superoxide dismutase [Cu-Zn] OS=Gossypium hirsutum OX=3635 GN=LOC107891599	LOC107891599	22.14	57.575	29.4	5	10	1	0.919	1.013	0.991	1.017	1.02	1.061	1.055	0.190424
A0A1U8I6T7	Trafficking protein particle complex subunit OS=Gossypium hirsutum OX=3635 GN=LOC107893425	LOC107893425	21.65	37.384	24.2	3	5	1	0.974	0.989	1.05	0.99	0.979	1.029	1.002	0.94328
A0A1U8I6W0	protein MNN4-like OS=Gossypium hirsutum OX=3635 GN=LOC107891627	LOC107891627	28.583	15.616	9.1	2	2	2	1.039	1.028	1.052	0.905	1.082	0.883	0.887	0.066898
A0A1U8I6W4	protein WVD2-like 6 isoform X2 OS=Gossypium hirsutum OX=3635 GN=LOC107893448	LOC107893448	47.018	10.927	8.5	4	4	2	1.171	0.879	1.239	0.732	1.206	0.702	0.64	0.0031233
A0A1U8I6X4	GABA transporter 1-like OS=Gossypium hirsutum OX=3635 GN=LOC107891642	LOC107891642	50.944	3.1523	3	1	2	1
A0A1U8I6X7	CDK5RAP3-like protein OS=Gossypium hirsutum OX=3635 GN=LOC107891263	LOC107891263	63.373	3.3344	19.1	10	14	2	0.923	1.097	0.881	1.051	0.855	1.258	1.281	0.013898
A0A1U8I6Z2	ubiquitin carboxyl-terminal hydrolase 26-like isoform X2 OS=Gossypium hirsutum OX=3635 GN=LOC107893490	LOC107893490	103.51	4.1939	3.3	3	3	3	1.191	0.764	1.307	0.737	1.119	0.811	0.639	0.00109656
A0A1U8I6Z3	G patch domain-containing protein 8-like OS=Gossypium hirsutum OX=3635 GN=LOC107893499	LOC107893499	34.66	4.6516	4.6	1	1	1
A0A1U8I6Z9	Pectin acetylesterase OS=Gossypium hirsutum OX=3635 GN=LOC107893495	LOC107893495	46.335	2.8496	15.3	6	9	1	1.255	0.769	1.259	0.941	0.92	0.805	0.732	0.064918
A0A1U8I701	Transmembrane 9 superfamily member OS=Gossypium hirsutum OX=3635 GN=LOC107893470	LOC107893470	74.146	41.29	17.7	11	14	1
A0A1U8I706	GBF-interacting protein 1-like isoform X2 OS=Gossypium hirsutum OX=3635 GN=LOC107893511	LOC107893511	78.797	8.6498	7.8	4	5	1	1.031	0.922	1.046	1.086	1.025	0.885	0.933	0.36154
A0A1U8I730	LOW QUALITY PROTEIN: DExH-box ATP-dependent RNA helicase DExH10-like OS=Gossypium hirsutum OX=3635 GN=LOC107893491	LOC107893491	99.72	5.3707	13.5	13	17	1	1.073	0.894	1.088	0.907	1.085	0.934	0.843	0.00022261
A0A1U8I740	MuDR family transposase isoform 2 OS=Theobroma cacao OX=3641 GN=TCM_026838 PE=4 SV=1	LOC107893500	85.521	2.9924	2.8	2	2	1
A0A1U8I742	Probable glycosyltransferase STELLO1 OS=Arabidopsis thaliana OX=3702 GN=STL1 PE=1 SV=1	LOC107891313	87.435	10.374	8.6	6	6	6	0.987	1.137	0.866	1.078	0.93	1.048	1.172	0.023238
A0A1U8I750	Coatomer subunit beta' OS=Gossypium hirsutum OX=3635 GN=LOC107891694	LOC107891694	102.24	150.01	27.8	21	39	6	0.945	1.005	1.02	0.915	1.035	1.027	0.982	0.70718
A0A1U8I776	glucan endo-1,3-beta-glucosidase, acidic-like OS=Gossypium hirsutum OX=3635 GN=LOC107891341	LOC107891341	41.456	100.72	34.5	10	23	6	0.155	1.637	0.164	1.655	0.158	2.445	12.027	0.0028837
A0A1U8I782	UDP-N-acetylglucosamine--dolichyl-phosphate N-acetylglucosaminephosphotransferase-like OS=Gossypium hirsutum OX=3635 GN=LOC107891344	LOC107891344	46.602	2.8017	4.8	2	2	2
A0A1U8I786	mitochondrial outer membrane protein porin 4-like OS=Gossypium hirsutum OX=3635 GN=LOC107893556	LOC107893556	29.502	40.765	31.5	10	19	10	1.003	1.031	0.976	0.974	1.02	0.971	0.992	0.7516
A0A1U8I787	probable calcium-binding protein CML35 OS=Gossypium hirsutum OX=3635 GN=LOC107891349	LOC107891349	25.433	5.0206	14.4	3	3	3	0.895	1.16	0.936	1.119	0.901	1.035	1.213	0.0061839
A0A1U8I794	eukaryotic initiation factor 4A-8-like OS=Gossypium hirsutum OX=3635 GN=LOC107891725	LOC107891725	46.767	7.018	42.9	20	81	1
A0A1U8I797	DNA-directed RNA polymerase V subunit 5A-like isoform X2 OS=Gossypium hirsutum OX=3635 GN=LOC107891355	LOC107891355	24.862	6.1103	18.8	5	6	5	1.194	0.863	1.2	0.749	1.134	0.798	0.683	0.00103597
A0A1U8I7A1	syntaxin-132-like isoform X2 OS=Gossypium hirsutum OX=3635 GN=LOC107893567	LOC107893567	31.926	14.099	13.8	3	4	3	1.184	0.892	1.095	0.898	0.93	0.991	0.867	0.151977
A0A1U8I7A4	COP9 signalosome complex subunit 6a-like OS=Gossypium hirsutum OX=3635 GN=LOC107893551	LOC107893551	39.734	66.785	27.5	7	11	2	1.039	1.197	0.954	1.02	0.756	1.066	1.194	0.158537
A0A1U8I7C7	KH domain-containing protein At4g18375-like isoform X2 OS=Gossypium hirsutum OX=3635 GN=LOC107891745	LOC107891745	67.469	52.183	22.5	12	14	1	1.043	0.928	1.04	0.986	1.046	0.953	0.916	0.038043
A0A1U8I7D1	rubisco accumulation factor 1, chloroplastic-like OS=Gossypium hirsutum OX=3635 GN=LOC107893598	LOC107893598	49.841	14.341	14.2	5	5	5	0.977	1.017	0.998	0.988	1.047	0.985	0.989	0.6748
A0A1U8I7D7	glycine-rich RNA-binding protein RZ1A-like OS=Gossypium hirsutum OX=3635 GN=LOC107893577	LOC107893577	22.482	9.5081	34.9	7	13	5	1.334	0.776	1.316	0.675	1.163	0.652	0.552	0.00097874
A0A1U8I7D8	dual specificity protein kinase YAK1-like isoform X2 OS=Gossypium hirsutum OX=3635 GN=LOC107891373	LOC107891373	93.323	6.0052	2.8	2	3	2
A0A1U8I7E3	40S ribosomal protein S21 OS=Gossypium hirsutum OX=3635 GN=LOC107893631	LOC107893631	8.8298	28.906	19	1	2	1	0.794	0.934	0.903	1.232	0.993	1.197	1.25	0.114239
A0A1U8I7E4	probable alkaline/neutral invertase D OS=Gossypium hirsutum OX=3635 GN=LOC107891383	LOC107891383	63.821	133.52	35.2	18	36	8	1.047	0.972	0.976	1.014	0.972	1.054	1.015	0.6793
A0A1U8I7E5	Proteasome subunit alpha type OS=Gossypium hirsutum OX=3635 GN=LOC107891756	LOC107891756	26.042	8.8475	67.1	12	37	0
A0A1U8I7F9	Lipoxygenase OS=Gossypium hirsutum OX=3635 GN=LOC107893644	LOC107893644	98.887	269.66	42.7	35	67	11	0.712	1.368	0.635	1.239	0.602	1.575	2.146	0.00087866
A0A1U8I7G3	dicarboxylate transporter 1, chloroplastic-like OS=Gossypium hirsutum OX=3635 GN=LOC107891399	LOC107891399	52.061	24.592	6.9	3	4	3	0.887	1.127	0.956	0.988	0.986	1.066	1.124	0.077363
A0A1U8I7H6	cinnamoyl-CoA reductase 1-like isoform X2 OS=Gossypium hirsutum OX=3635 GN=LOC107893611	LOC107893611	35.357	77.844	44.9	12	26	1	0.861	1.097	0.83	1.216	0.878	1.173	1.357	0.00089819
A0A1U8I7L4	40S ribosomal protein S12 OS=Gossypium hirsutum OX=3635 GN=LOC107893657	LOC107893657	14.71	9.8237	44.2	7	20	1	0.986	0.998	0.967	1.008	1.135	0.908	0.944	0.40288
A0A1U8I7L9	28S ribosomal protein S29, mitochondrial-like OS=Gossypium hirsutum OX=3635 GN=LOC107893660	LOC107893660	51.695	9.7584	12.8	4	4	4	1.031	0.966	1.025	1.026	0.941	0.993	0.996	0.92462
A0A1U8I7M7	isoflavone reductase-like protein OS=Gossypium hirsutum OX=3635 GN=LOC107893695	LOC107893695	33.936	129.07	53.9	14	30	3	0.985	0.98	0.98	0.988	1.074	1.004	0.978	0.52136
A0A1U8I7N1	pentatricopeptide repeat-containing protein At1g61870, mitochondrial-like OS=Gossypium hirsutum OX=3635 GN=LOC107891814	LOC107891814	44.861	5.4589	9.8	4	5	4	1.122	0.967	1.103	0.865	1.043	0.852	0.821	0.0122385
A0A1U8I7S3	vacuolar protein sorting-associated protein 26A-like OS=Gossypium hirsutum OX=3635 GN=LOC107891477	LOC107891477	35.282	34.002	20.9	5	6	1
A0A1U8I7T2	COP9 signalosome complex subunit 2-like OS=Gossypium hirsutum OX=3635 GN=LOC107891480	LOC107891480	51.333	1.9477	7.7	4	7	1
A0A1U8I7U2	eukaryotic translation initiation factor 2 subunit gamma-like OS=Gossypium hirsutum OX=3635 GN=LOC107891860	LOC107891860	50.825	127.64	38.6	17	27	17	1.017	1.009	0.993	1.024	0.978	1.014	1.02	0.181678
A0A1U8I7U4	tetraspanin-3-like OS=Gossypium hirsutum OX=3635 GN=LOC107891497	LOC107891497	32.002	27.71	21.1	6	11	6	0.994	1.034	0.929	1.108	0.936	1.02	1.106	0.039481
A0A1U8I7V3	ERAD-associated E3 ubiquitin-protein ligase HRD1B-like isoform X2 OS=Gossypium hirsutum OX=3635 GN=LOC107891508	LOC107891508	60.613	24.526	10.5	5	6	4	1.013	1.067	0.927	0.997	0.936	1.096	1.099	0.077083
A0A1U8I7V8	BnaC08g43090D protein OS=Brassica napus OX=3708 GN=BnaC08g43090D PE=4 SV=1	LOC107891512	14.878	1.1179	6.8	1	1	1
A0A1U8I7V9	F-box protein At3g07870-like OS=Gossypium hirsutum OX=3635 GN=LOC107891880	LOC107891880	53.683	38.76	12.7	5	9	5	1.111	0.872	1.06	0.988	1.029	0.88	0.856	0.027277
A0A1U8I7W5	Cysteine synthase OS=Gossypium hirsutum OX=3635 GN=LOC107893759	LOC107893759	32.376	82.261	49.2	13	23	8	1.067	0.962	1.086	0.912	1.014	0.948	0.891	0.0114387
A0A1U8I7X9	N-carbamoylputrescine amidase-like OS=Gossypium hirsutum OX=3635 GN=LOC107891527	LOC107891527	33.419	27.458	20	6	9	6	1.064	0.938	1.015	0.961	1.049	1.002	0.927	0.033778
A0A1U8I802	ras-related protein RABE1c-like OS=Gossypium hirsutum OX=3635 GN=LOC107893784	LOC107893784	23.755	-2	36.3	9	21	1
A0A1U8I810	probable methyltransferase PMT7 OS=Gossypium hirsutum OX=3635 GN=LOC107891555	LOC107891555	68.39	11.243	6	3	3	3	1.034	0.941	1.04	0.902	1.057	1.026	0.916	0.08222
A0A1U8I811	5-methyltetrahydropteroyltriglutamate-- homocysteine methyltransferase-like OS=Gossypium hirsutum OX=3635 GN=LOC107893772	LOC107893772	84.81	74.897	35.8	30	102	0
A0A1U8I814	ran-binding protein 1 homolog b-like OS=Gossypium hirsutum OX=3635 GN=LOC107891560	LOC107891560	24.925	53.195	65.9	12	21	5	1.071	0.909	1.138	0.786	1.108	0.915	0.787	0.0100594
A0A1U8I817	26S proteasome non-ATPase regulatory subunit 7 homolog A-like OS=Gossypium hirsutum OX=3635 GN=LOC107891564	LOC107891564	31.937	4.9919	35.4	10	24	2	1.048	1.022	1.088	0.966	0.967	1	0.963	0.3924
A0A1U8I828	Importin subunit alpha OS=Gossypium hirsutum OX=3635 GN=LOC107893816	LOC107893816	59.633	9.5451	27.7	12	19	1	1.114	0.857	1.056	0.972	1.122	0.853	0.815	0.0116405
A0A1U8I846	Carboxypeptidase OS=Gossypium hirsutum OX=3635 GN=LOC107891588	LOC107891588	50.886	10.249	7.6	3	3	3	1.216	0.857	1.301	0.809	1.03	0.721	0.673	0.0101814
A0A1U8I849	transmembrane emp24 domain-containing protein p24delta9-like OS=Gossypium hirsutum OX=3635 GN=LOC107893799	LOC107893799	24.386	12.505	24.5	5	8	4	0.956	1.204	0.909	0.976	0.928	1.071	1.164	0.076436
A0A1U8I864	acyl-coenzyme A oxidase 4, peroxisomal-like OS=Gossypium hirsutum OX=3635 GN=LOC107893796	LOC107893796	47.685	71.441	30.9	10	23	7	0.956	1.096	0.909	1.054	0.862	1.119	1.199	0.0063016
A0A1U8I882	acetylornithine aminotransferase, mitochondrial-like OS=Gossypium hirsutum OX=3635 GN=LOC107891631	LOC107891631	48.544	3.6153	23	9	12	3
A0A1U8I887	protein PIR isoform X1 OS=Gossypium hirsutum OX=3635 GN=LOC107893827	LOC107893827	146.09	25.355	7	9	10	3	1.107	0.879	1.047	0.863	1.06	1.035	0.864	0.068217
A0A1U8I8A1	E3 ubiquitin-protein ligase PRT6-like OS=Gossypium hirsutum OX=3635 GN=LOC107893857	LOC107893857	230.79	1.5386	4.6	9	12	1	0.981	0.887	0.996	1.006	1.009	1.141	1.016	0.89676
A0A1U8I8F9	sorbitol dehydrogenase-like OS=Gossypium hirsutum OX=3635 GN=LOC107892058	LOC107892058	39.022	55.438	43.5	13	14	13	0.973	1.012	1.005	1.037	0.9	1.023	1.067	0.119157
A0A1U8I8G6	Immunoglobulin superfamily member 2 OS=Gossypium arboreum OX=29729 GN=F383_26699 PE=4 SV=1	LOC107893894	26.002	9.5455	17	3	3	3	1.017	0.944	1.011	1.033	1.015	0.978	0.971	0.37128
A0A1U8I8H1	carboxypeptidase Y-like OS=Gossypium hirsutum OX=3635 GN=LOC107893814	LOC107893814	35.128	5.8696	20.5	6	12	1	1.076	0.925	1.105	0.865	1.248	0.736	0.737	0.019642
A0A1U8I8I1	Serine/threonine-protein phosphatase 2A 55 kDa regulatory subunit B OS=Gossypium hirsutum OX=3635 GN=LOC107891721	LOC107891721	57.242	3.2656	16.6	8	10	1
A0A1U8I8I6	Pyridoxine 5'-phosphate synthase OS=Gossypium arboreum OX=29729 GN=F383_11410 PE=4 SV=1	LOC107892077	88.169	25.117	15.6	8	8	6	0.93	1.038	0.946	1.047	0.933	1.146	1.15	0.0123358
A0A1U8I8J6	40S ribosomal protein S10-like OS=Gossypium hirsutum OX=3635 GN=LOC107892088	LOC107892088	19.891	46.338	50.6	10	30	2	0.965	0.987	1.027	1.022	0.981	1.033	1.023	0.37488
A0A1U8I8K2	Purple acid phosphatase OS=Gossypium hirsutum OX=3635 GN=LOC107893926	LOC107893926	74.065	26.132	11	6	11	1
A0A1U8I8K9	coatomer subunit zeta-1-like OS=Gossypium hirsutum OX=3635 GN=LOC107891739	LOC107891739	19.492	29.184	26.6	3	9	0
A0A1U8I8L8	Non-specific serine/threonine protein kinase OS=Gossypium hirsutum OX=3635 GN=LOC107891746	LOC107891746	50.829	5.5222	7.3	3	3	3	1.226	0.813	1.095	0.843	1.115	0.869	0.735	0.00154173
A0A1U8I8Q7	E3 ubiquitin-protein ligase RGLG2-like OS=Gossypium hirsutum OX=3635 GN=LOC107892134	LOC107892134	51.523	1.5048	2.1	1	1	1	0.996	1.041	1.022	0.95	0.965	1.044	1.017	0.6612
A0A1U8I8R9	glutamate 5-kinase OS=Gossypium hirsutum OX=3635 GN=LOC107893867	LOC107893867	35.498	12.586	15.5	5	7	5	1.18	0.796	1.218	0.764	1.183	0.795	0.658	1.78028e-05
A0A1U8I8T5	BnaA09g01880D protein OS=Brassica napus OX=3708 GN=BnaA09g01880D PE=4 SV=1	LOC107892158	18.515	12.992	20.5	2	2	1
A0A1U8I8W5	WD repeat-containing protein WRAP73-like isoform X2 OS=Gossypium hirsutum OX=3635 GN=LOC107892182	LOC107892182	34.271	3.599	4	1	1	1
A0A1U8I8W6	pyrophosphate-energized vacuolar membrane proton pump-like OS=Gossypium hirsutum OX=3635 GN=LOC107893910	LOC107893910	79.995	6.3531	18.2	14	29	1	1.36	0.681	1.21	0.577	1.347	0.727	0.507	0.00095608
A0A1U8I8W9	lysine histidine transporter 1-like OS=Gossypium hirsutum OX=3635 GN=LOC107892186	LOC107892186	50.301	2.0941	2.7	1	1	1	0.961	1.096	0.95	1.019	1.009	0.989	1.063	0.164955
A0A1U8I8X7	Glucose-6-phosphate 1-dehydrogenase OS=Gossypium hirsutum OX=3635 GN=LOC107892194	LOC107892194	58.845	115.9	40.1	19	37	7	1.081	0.926	1.03	0.91	1.077	0.988	0.886	0.0144835
A0A1U8I8X8	lysine-specific demethylase JMJ25-like OS=Gossypium hirsutum OX=3635 GN=LOC107891819	LOC107891819	102.62	0.91447	0.8	1	1	1	1.329	0.871	1.166	0.578	1.241	0.739	0.586	0.0118751
A0A1U8I8Y4	Importin subunit alpha OS=Gossypium hirsutum OX=3635 GN=LOC107893934	LOC107893934	56.133	20.984	18.5	8	11	2	0.927	1.079	0.975	1.107	0.99	0.933	1.078	0.26738
A0A1U8I902	heat shock 70 kDa protein, mitochondrial-like OS=Gossypium hirsutum OX=3635 GN=LOC107891838	LOC107891838	73.292	4.4069	34.8	26	62	1	0.905	1.196	0.875	1.104	0.9	1.077	1.26	0.0022978
A0A1U8I915	Putative C5orf35 OS=Gossypium arboreum OX=29729 GN=F383_20453 PE=4 SV=1	LOC107894044	44.867	5.0805	15.2	5	5	5	0.939	1.031	0.98	1.014	1.003	1.057	1.062	0.057879
A0A1U8I922	peroxisomal fatty acid beta-oxidation multifunctional protein MFP2-like isoform X1 OS=Gossypium hirsutum OX=3635 GN=LOC107891859	LOC107891859	78.882	80.956	29.4	23	36	18	1.097	0.924	1.066	0.945	1.024	0.93	0.878	0.0035553
A0A1U8I928	homeobox-leucine zipper protein ATHB-13-like OS=Gossypium hirsutum OX=3635 GN=LOC107893967	LOC107893967	32.762	6.4814	13.2	4	4	2	1.003	0.94	1.066	0.812	1.154	1.014	0.858	0.112985
A0A1U8I950	calcium-binding protein 39-like OS=Gossypium hirsutum OX=3635 GN=LOC107891881	LOC107891881	39.608	28.444	13.1	4	6	4	1.132	0.837	1.066	0.858	1.139	0.886	0.773	0.00066121
A0A1U8I955	3-isopropylmalate dehydratase large subunit-like OS=Gossypium hirsutum OX=3635 GN=LOC107891889	LOC107891889	54.008	5.0322	31.1	14	24	3
A0A1U8I956	cAMP-regulated phosphoprotein 19-related protein isoform 1 OS=Theobroma cacao OX=3641 GN=TCM_007505 PE=3 SV=1	LOC107893992	11.884	38.483	60	5	10	1	0.847	1.159	0.893	1.122	1	1.023	1.206	0.037862
A0A1U8I957	protein RST1 OS=Gossypium hirsutum OX=3635 GN=LOC107892264	LOC107892264	206.38	12.147	2.7	4	4	4
A0A1U8I969	Putative HR-like lesion-inducing protein OS=Gossypium arboreum OX=29729 PE=2 SV=1	LOC107891906	17.399	1.8016	5.7	2	3	2	1.362	0.776	1.233	0.688	1.271	0.569	0.526	0.0023842
A0A1U8I973	Tetratricopeptide-like helical OS=Corchorus capsularis OX=210143 GN=CCACVL1_04293 PE=4 SV=1	LOC107894072	48.789	24.991	18.3	7	9	3	0.98	1.014	0.949	0.94	1.038	1.102	1.03	0.62284
A0A1U8I975	calcium-dependent protein kinase 4 OS=Gossypium hirsutum OX=3635 GN=LOC107894006	LOC107894006	54.624	4.5706	17	8	14	1	1.139	0.769	1.063	0.898	1.086	1.028	0.82	0.075944
A0A1U8I980	probable serine/threonine-protein kinase DDB_G0282963 OS=Gossypium hirsutum OX=3635 GN=LOC107891917	LOC107891917	84.926	4.4901	1.6	1	1	1	1.142	0.964	1.039	0.882	1.122	0.828	0.81	0.0158361
A0A1U8I9A4	Suppressor of gene silencing 3 OS=Gossypium arboreum OX=29729 GN=F383_26624 PE=4 SV=1	LOC107891937	55.055	21.424	8.9	5	5	5	1.139	0.874	1.149	0.897	1.07	0.834	0.776	0.00120093
A0A1U8I9C1	flavin-dependent oxidoreductase FOX2-like isoform X1 OS=Gossypium hirsutum OX=3635 GN=LOC107894114	LOC107894114	59.078	1.5008	8.1	3	5	1
A0A1U8I9D2	beta-glucosidase BoGH3B-like OS=Gossypium hirsutum OX=3635 GN=LOC107891956	LOC107891956	66.674	15.192	28.4	17	29	1	1.042	0.903	1.049	1.053	0.941	1.02	0.982	0.75484
A0A1U8I9E0	AAA-ATPase ASD, mitochondrial-like OS=Gossypium hirsutum OX=3635 GN=LOC107892327	LOC107892327	59.787	6.5941	9.1	4	4	3	0.592	1.458	0.422	1.563	0.417	1.78	3.355	0.00069686
A0A1U8I9E1	neurogenic protein mastermind-like OS=Gossypium hirsutum OX=3635 GN=LOC107891965	LOC107891965	54.436	18.792	13.5	6	7	6	1.035	0.967	1.065	1.027	1.056	0.919	0.923	0.071099
A0A1U8I9G7	NF-X1-type zinc finger protein NFXL1-like OS=Gossypium hirsutum OX=3635 GN=LOC107891982	LOC107891982	116.83	3.4179	0.9	1	1	1
A0A1U8I9H6	Adenine nucleotide alpha hydrolases-like superfamily protein isoform 2 OS=Theobroma cacao OX=3641 GN=TCM_007846 PE=4 SV=1	LOC107894156	27.793	2.4681	22.5	5	10	2	1.037	1.018	1.03	1.009	1.01	0.896	0.95	0.275
A0A1U8I9H9	SAL1 phosphatase-like isoform X1 OS=Gossypium hirsutum OX=3635 GN=LOC107892352	LOC107892352	37.031	25.59	17	6	11	1	1.272	0.923	1.168	0.7	1.098	0.786	0.681	0.0128171
A0A1U8I9J3	V-type proton ATPase subunit OS=Gossypium hirsutum OX=3635 GN=LOC107892365	LOC107892365	40.598	105.12	33.3	9	26	1	0.827	1.115	0.841	1.151	0.828	1.262	1.413	0.0116436
A0A1U8I9J9	fatty acid amide hydrolase-like isoform X2 OS=Gossypium hirsutum OX=3635 GN=LOC107894183	LOC107894183	66.562	58.009	22.9	10	10	7	1.187	0.751	1.111	0.777	1.292	0.801	0.649	0.00081776
A0A1U8I9K0	Dolichyl-diphosphooligosaccharide--protein glycosyltransferase 48 kDa subunit OS=Gossypium hirsutum OX=3635 GN=LOC107894192	LOC107894192	48.947	61.986	19	8	18	6	0.902	1.131	0.841	1.142	0.847	1.163	1.327	0.0002809
A0A1U8I9L2	probable mitochondrial-processing peptidase subunit beta, mitochondrial isoform X1 OS=Gossypium hirsutum OX=3635 GN=LOC107892381	LOC107892381	59.005	9.2219	41.7	19	58	1	0.935	1.026	1.11	0.974	0.984	0.975	0.982	0.78484
A0A1U8I9L6	protein CASP-like OS=Gossypium hirsutum OX=3635 GN=LOC107892018	LOC107892018	78.945	1.1031	20.1	13	14	1
A0A1U8I9L9	4-hydroxy-3-methylbut-2-enyl diphosphate reductase, chloroplastic-like OS=Gossypium hirsutum OX=3635 GN=LOC107894193	LOC107894193	51.733	4.7161	13.9	7	8	3	1.057	1.001	0.973	1.066	0.968	0.949	1.006	0.90372
A0A1U8I9M3	probable 1-acyl-sn-glycerol-3-phosphate acyltransferase 5 isoform X2 OS=Gossypium hirsutum OX=3635 GN=LOC107894195	LOC107894195	40.15	2.5796	2.9	1	1	1
A0A1U8I9P2	Diacylglycerol kinase OS=Gossypium hirsutum OX=3635 GN=LOC107894122	LOC107894122	55.031	69.355	33.3	14	23	2	0.924	1.006	0.906	1.135	0.947	1.185	1.198	0.024498
A0A1U8I9R6	S-acyltransferase OS=Gossypium hirsutum OX=3635 GN=LOC107892066	LOC107892066	49.607	12.188	19	6	7	2
A0A1U8I9S8	importin beta-like SAD2 OS=Gossypium hirsutum OX=3635 GN=LOC107892441	LOC107892441	112.92	5.0489	3.2	3	4	3	0.897	0.978	1.084	0.883	1.006	1.167	1.014	0.92434
A0A1U8I9T0	probable 3-hydroxyisobutyrate dehydrogenase-like 2, mitochondrial OS=Gossypium hirsutum OX=3635 GN=LOC107894231	LOC107894231	33.665	20.647	13.8	3	3	3	0.939	0.968	1.041	1.065	1.056	0.935	0.978	0.6926
A0A1U8I9T4	costars family protein-like OS=Gossypium hirsutum OX=3635 GN=LOC107894171	LOC107894171	10.021	13.543	51.6	4	8	4	0.825	1.222	0.936	1.041	0.984	1.058	1.21	0.059644
A0A1U8I9U4	serine/threonine-protein kinase SRK2A-like OS=Gossypium hirsutum OX=3635 GN=LOC107894240	LOC107894240	40.499	104.82	25.4	9	17	4	0.915	1.05	0.954	1.039	0.927	1.13	1.151	0.0085564
A0A1U8I9U9	subtilisin-like protease SBT1.3 OS=Gossypium hirsutum OX=3635 GN=LOC107892083	LOC107892083	83.54	89.664	19.3	14	31	3	1.058	0.97	1.046	0.972	1.003	0.95	0.931	0.0159163
A0A1U8I9V0	thiamine biosynthetic bifunctional enzyme TH1, chloroplastic-like OS=Gossypium hirsutum OX=3635 GN=LOC107894239	LOC107894239	60.501	27.101	17.1	8	9	8	1.012	0.938	1.055	0.958	1.111	0.878	0.873	0.022583
A0A1U8I9V1	phosphoglycerate mutase-like protein 1 isoform X4 OS=Gossypium hirsutum OX=3635 GN=LOC107894185	LOC107894185	31.026	28.386	43.9	11	16	11	0.933	1.02	1.006	1.062	0.987	0.995	1.052	0.162621
A0A1U8I9V7	DENN domain and WD repeat-containing protein SCD1-like OS=Gossypium hirsutum OX=3635 GN=LOC107892477	LOC107892477	146.25	30.716	9.1	11	16	11	1.031	0.957	0.996	0.965	1.013	1	0.961	0.077139
A0A1U8I9W9	pentatricopeptide repeat-containing protein At2g15690 OS=Gossypium hirsutum OX=3635 GN=LOC107894258	LOC107894258	66.706	58.108	19.1	9	11	9	1.007	0.901	1.043	0.979	1.06	0.955	0.912	0.032359
A0A1U8IA00	GDSL esterase/lipase At5g33370-like OS=Gossypium hirsutum OX=3635 GN=LOC107892117	LOC107892117	40.289	8.5379	6.8	2	3	1	1.085	0.85	1.028	0.892	1.391	0.703	0.698	0.039359
A0A1U8IA04	40S ribosomal protein S16-like OS=Gossypium hirsutum OX=3635 GN=LOC107894283	LOC107894283	16.532	9.2353	55.5	11	27	0
A0A1U8IA12	binding partner of ACD11 1-like OS=Gossypium hirsutum OX=3635 GN=LOC107894220	LOC107894220	32.806	40.752	25.7	6	6	5	0.948	1.108	0.971	0.983	1.019	1.05	1.069	0.179083
A0A1U8IA13	Glycosyltransferase OS=Gossypium hirsutum OX=3635 GN=LOC107894291	LOC107894291	53.953	50.819	13.8	6	9	6	0.918	1.239	0.799	1.039	0.931	1.133	1.288	0.022956
A0A1U8IA18	kynurenine formamidase-like OS=Gossypium hirsutum OX=3635 GN=LOC107894297	LOC107894297	30.6	37.095	33.2	9	16	7	0.978	1.082	0.979	1.015	0.989	0.992	1.049	0.21674
A0A1U8IA19	Polyadenylate-binding protein OS=Gossypium hirsutum OX=3635 GN=LOC107894289	LOC107894289	70.526	127.97	39.7	21	58	8	1.043	0.957	1.084	1.019	1.076	0.846	0.881	0.081542
A0A1U8IA23	D-3-phosphoglycerate dehydrogenase OS=Gossypium hirsutum OX=3635 GN=LOC107894299	LOC107894299	63.736	185.15	39.7	19	35	12	1.028	0.974	1.038	0.993	1.013	0.908	0.934	0.069376
A0A1U8IA24	kynurenine formamidase-like OS=Gossypium hirsutum OX=3635 GN=LOC107894296	LOC107894296	26.891	22.688	31	8	11	3	0.941	1.127	0.889	1.201	0.846	1.05	1.262	0.0093446
A0A1U8IA25	Coatomer subunit gamma OS=Gossypium hirsutum OX=3635 GN=LOC107894228	LOC107894228	98.346	323.31	42.3	32	54	2	0.967	1.02	0.91	1.065	0.953	1.126	1.135	0.020777
A0A1U8IA58	fidgetin-like protein 1 isoform X2 OS=Gossypium hirsutum OX=3635 GN=LOC107892163	LOC107892163	70.931	4.5036	1.9	1	1	1
A0A1U8IA79	LOW QUALITY PROTEIN: protein TPLATE-like OS=Gossypium hirsutum OX=3635 GN=LOC107892180	LOC107892180	128.05	17.479	28.2	28	39	2	0.972	1.063	0.912	1.032	0.934	1.129	1.144	0.014204
A0A1U8IA89	DNA-binding storekeeper protein-related OS=Theobroma cacao OX=3641 GN=TCM_017091 PE=4 SV=1	LOC107892187	28.44	1.4463	3.6	1	1	1
A0A1U8IA95	Cytosolic Fe-S cluster assembly factor NBP35 OS=Gossypium hirsutum OX=3635 GN=LOC107892192	LOC107892192	38.205	36.301	34.7	10	16	10	0.986	0.986	0.967	0.994	1.002	1.032	1.019	0.33608
A0A1U8IA97	Mitochondrial Rho GTPase OS=Gossypium hirsutum OX=3635 GN=LOC107894362	LOC107894362	71.833	139.67	37.7	22	27	2
A0A1U8IAC5	Glycerol-3-phosphate dehydrogenase [NAD(+)] OS=Gossypium hirsutum OX=3635 GN=LOC107892221	LOC107892221	48.186	1.353	2.3	1	1	1
A0A1U8IAG0	ras-related protein RABB1b-like OS=Gossypium hirsutum OX=3635 GN=LOC107892242	LOC107892242	23.192	48.547	55	11	17	2	1.018	1.339	0.908	1.012	0.839	0.927	1.186	0.2655
A0A1U8IAH1	heterogeneous nuclear ribonucleoprotein 1-like isoform X1 OS=Gossypium hirsutum OX=3635 GN=LOC107892251	LOC107892251	38.528	61.731	29.6	9	17	2	0.998	0.995	1	0.992	1.099	0.915	0.937	0.198081
A0A1U8IAI8	40S ribosomal protein S17-like OS=Gossypium hirsutum OX=3635 GN=LOC107892259	LOC107892259	16.063	4.1197	40.4	7	17	1	1.087	1.039	0.957	0.964	0.938	1.036	1.019	0.7149
A0A1U8IAK3	FRIGIDA-like protein OS=Gossypium hirsutum OX=3635 GN=LOC107894378	LOC107894378	40.337	2.0968	4.1	1	1	1
A0A1U8IAK4	glutaredoxin-like isoform X2 OS=Gossypium hirsutum OX=3635 GN=LOC107892273	LOC107892273	11.406	157.32	75.7	7	15	5	1.021	0.989	1.049	1.016	1.079	0.823	0.898	0.176703
A0A1U8IAM0	serine/threonine-protein kinase BLUS1-like OS=Gossypium hirsutum OX=3635 GN=LOC107892286	LOC107892286	76.594	34.313	20.4	11	14	6	1.087	0.987	1.027	0.944	1.024	0.957	0.92	0.024283
A0A1U8IAM5	protein farnesyltransferase subunit beta-like isoform X2 OS=Gossypium hirsutum OX=3635 GN=LOC107892292	LOC107892292	49.963	24.353	6.6	3	3	3	0.922	1.137	0.888	1.09	0.896	1.12	1.237	0.00022131
A0A1U8IAN8	microtubule-associated protein futsch-like OS=Gossypium hirsutum OX=3635 GN=LOC107894415	LOC107894415	149.67	1.0119	2.5	3	4	2
A0A1U8IAP4	Ferredoxin-thioredoxin reductase, catalytic chain OS=Gossypium hirsutum OX=3635 GN=LOC107892308	LOC107892308	16.296	2.3123	12.4	2	2	1
A0A1U8IAR6	ruBisCO large subunit-binding protein subunit beta, chloroplastic-like OS=Gossypium hirsutum OX=3635 GN=LOC107894552	LOC107894552	15.139	1.7501	22.1	1	2	1	0.943	0.996	1.022	0.967	1.071	1.01	0.979	0.64168
A0A1U8IAV0	60S ribosomal export protein NMD3 OS=Gossypium hirsutum OX=3635 GN=LOC107892343	LOC107892343	58.317	30.177	21.3	11	14	11	1.007	0.951	0.975	0.993	1.059	0.966	0.957	0.183621
A0A1U8IAV8	Inositol hexakisphosphate and diphosphoinositol-pentakisphosphate kinase OS=Gossypium hirsutum OX=3635 GN=LOC107892349	LOC107892349	119.63	26.238	12.5	11	15	11	1.148	0.812	1.069	0.827	1.166	0.867	0.741	0.00082239
A0A1U8IAW9	mitochondrial outer membrane protein porin of 34 kDa-like OS=Gossypium hirsutum OX=3635 GN=LOC107892361	LOC107892361	29.542	79.663	36.2	10	20	1
A0A1U8IAY7	RING-type E3 ubiquitin transferase OS=Gossypium hirsutum OX=3635 GN=LOC107894527	LOC107894527	59.338	1.6431	2.2	1	2	1	1.031	0.941	1.105	0.905	1.069	0.935	0.868	0.003743
A0A1U8IB08	protease Do-like 8, chloroplastic OS=Gossypium hirsutum OX=3635 GN=LOC107892392	LOC107892392	48.522	8.771	8.8	4	6	4	1.09	0.89	1.114	0.93	1.071	0.88	0.824	0.00068273
A0A1U8IB79	ER membrane protein complex subunit 2-like OS=Gossypium hirsutum OX=3635 GN=LOC107894762	LOC107894762	33.573	66.791	36.7	10	15	2	1.018	0.981	1.036	0.971	0.98	1.024	0.981	0.4506
A0A1U8IB80	cysteine synthase-like OS=Gossypium hirsutum OX=3635 GN=LOC107894720	LOC107894720	34.076	-2	42	11	42	1	1.084	1.101	0.998	0.78	1.004	1.043	0.948	0.59134
A0A1U8IB90	probable ribose-5-phosphate isomerase 3, chloroplastic OS=Gossypium hirsutum OX=3635 GN=LOC107894773	LOC107894773	29.435	4.5627	14.8	4	4	1	0.885	1.179	0.891	1.126	0.869	1.112	1.292	0.000183425
A0A1U8IBA3	BnaA05g37120D protein OS=Brassica napus OX=3708 GN=BnaA05g37120D PE=4 SV=1	LOC107892489	18.874	39.987	55.7	9	10	9	1.077	0.874	1.015	0.97	0.978	1.027	0.935	0.28088
A0A1U8IBG7	probable aldo-keto reductase 1 OS=Gossypium hirsutum OX=3635 GN=LOC107894865	LOC107894865	37.267	48.694	40.8	13	34	3	0.99	0.998	1.009	0.875	1.077	0.967	0.923	0.161977
A0A1U8IBH4	WD repeat-containing protein 48-like OS=Gossypium hirsutum OX=3635 GN=LOC107893215	LOC107893215	80.519	82.17	17.6	11	11	5	0.988	0.906	0.953	1.029	1.016	1.133	1.038	0.64954
A0A1U8IBJ0	PITH domain-containing protein At3g04780 OS=Gossypium hirsutum OX=3635 GN=LOC107893224	LOC107893224	19.669	44.491	22.6	3	7	1	1.024	1.01	0.987	0.934	1.09	0.958	0.936	0.149104
A0A1U8IBL4	protein HASTY 1-like OS=Gossypium hirsutum OX=3635 GN=LOC107893251	LOC107893251	133.66	43.73	7.8	8	11	1	1.269	0.879	1.132	0.68	1.217	0.761	0.641	0.0052954
A0A1U8IBM2	Histone H2A OS=Gossypium hirsutum OX=3635 GN=LOC107893261	LOC107893261	14.779	2.7424	25	5	10	2	1.414	0.721	1.394	0.825	0.852	0.712	0.617	0.056801
A0A1U8IBM5	probable aldo-keto reductase 1 OS=Gossypium hirsutum OX=3635 GN=LOC107894797	LOC107894797	37.62	209.76	64	19	93	1
A0A1U8IBM7	LYR motif-containing protein At3g19508 OS=Gossypium hirsutum OX=3635 GN=LOC107894970	LOC107894970	9.9492	6.0635	31.3	3	3	3	0.946	1.073	1.01	1.117	0.949	0.966	1.086	0.166636
A0A1U8IBM8	4-hydroxy-4-methyl-2-oxoglutarate aldolase OS=Gossypium hirsutum OX=3635 GN=LOC107892631	LOC107892631	17.9	4.6625	34.5	6	12	3
A0A1U8IBN4	probable aldo-keto reductase 1 OS=Gossypium hirsutum OX=3635 GN=LOC107894809	LOC107894809	37.631	32.375	64	20	142	1	0.956	1.114	0.971	1.056	0.954	0.994	1.098	0.050096
A0A1U8IBN7	probable aldo-keto reductase 1 OS=Gossypium hirsutum OX=3635 GN=LOC107894822	LOC107894822	37.47	321.98	64.6	21	142	3	1.235	0.838	1.135	0.824	1.176	0.768	0.685	0.00047839
A0A1U8IBP2	probable aldo-keto reductase 1 OS=Gossypium hirsutum OX=3635 GN=LOC107894834	LOC107894834	37.566	96.42	65.2	21	140	2	0.988	1.108	0.975	1.026	1.002	0.965	1.045	0.35416
A0A1U8IBR0	Importin subunit alpha OS=Gossypium hirsutum OX=3635 GN=LOC107893290	LOC107893290	58.233	9.6576	31.2	14	24	1	0.899	0.862	0.949	0.969	1.06	1.297	1.076	0.6692
A0A1U8IBS5	Agenet domain-containing protein, putative OS=Theobroma cacao OX=3641 GN=TCM_026790 PE=4 SV=1	LOC107893300	40.457	33.637	20.2	7	9	7	0.99	0.923	1.064	1.03	1.067	0.919	0.92	0.133156
A0A1U8IBT7	protein YLS3-like OS=Gossypium hirsutum OX=3635 GN=LOC107894907	LOC107894907	16.259	24.086	26.1	3	5	2	1.533	0.386	1.497	0.371	1.635	0.35	0.237	1.5734e-06
A0A1U8IBT8	tubulin-folding cofactor B-like OS=Gossypium hirsutum OX=3635 GN=LOC107895011	LOC107895011	27.362	29.502	24.8	6	8	1
A0A1U8IBW9	Superoxide dismutase [Cu-Zn] OS=Gossypium hirsutum OX=3635 GN=LOC107895027	LOC107895027	15.085	0.92721	40.1	6	18	2	0.997	1.036	1.109	0.912	1.022	0.915	0.915	0.166597
A0A1U8IBY1	carboxypeptidase Y-like OS=Gossypium hirsutum OX=3635 GN=LOC107895039	LOC107895039	34.646	27.226	24	8	17	3	1.083	0.879	1.007	0.848	1.267	0.857	0.77	0.064361
A0A1U8IBY6	protein NUCLEAR FUSION DEFECTIVE 4-like OS=Gossypium hirsutum OX=3635 GN=LOC107893348	LOC107893348	62.765	2.2666	1.6	1	1	1	1.316	0.725	1.165	0.746	1.292	0.671	0.568	0.00033596
A0A1U8IC07	FRIGIDA interacting protein 1 OS=Theobroma cacao OX=3641 GN=TCM_037526 PE=4 SV=1	LOC107893360	40.95	9.3408	7.8	2	2	2	1.035	0.971	0.996	0.955	1.025	1.027	0.966	0.23546
A0A1U8IC29	phosphoinositide phosphatase SAC3-like OS=Gossypium hirsutum OX=3635 GN=LOC107893377	LOC107893377	94.134	5.4053	4.6	4	4	2
A0A1U8IC45	copper transporter 5.1-like OS=Gossypium hirsutum OX=3635 GN=LOC107893389	LOC107893389	15.44	1.0439	16.5	2	2	2	0.865	1.433	0.758	1.024	0.6	1.447	1.756	0.022743
A0A1U8IC60	ran-binding protein 1 homolog a-like OS=Gossypium hirsutum OX=3635 GN=LOC107893398	LOC107893398	25.047	72.189	39.9	8	8	3	0.771	0.919	0.905	1.068	0.961	1.445	1.301	0.167824
A0A1U8IC69	tubulin-folding cofactor B-like isoform X2 OS=Gossypium hirsutum OX=3635 GN=LOC107895022	LOC107895022	27.389	1.0058	22.7	6	8	1
A0A1U8IC85	protein RTF2 homolog OS=Gossypium hirsutum OX=3635 GN=LOC107893426	LOC107893426	37.868	7.1978	10.5	4	5	4	1.069	0.924	1.048	1.023	1.032	0.896	0.903	0.066058
A0A1U8IC87	protein IQ-DOMAIN 1 OS=Gossypium hirsutum OX=3635 GN=LOC107892875	LOC107892875	44.138	-2	2.6	1	1	1	0.918	0.969	0.93	1.085	0.957	1.183	1.154	0.076699
A0A1U8IC89	sucrose transport protein SUC8-like OS=Gossypium hirsutum OX=3635 GN=LOC107895105	LOC107895105	53.5	2.581	2.4	1	1	1	1.407	0.585	1.4	0.444	1.518	0.487	0.351	0.00024237
A0A1U8ICD6	probable CCR4-associated factor 1 homolog 7 OS=Gossypium hirsutum OX=3635 GN=LOC107893466	LOC107893466	31.166	9.0358	10.9	3	3	2	0.925	1.098	0.934	1.135	0.86	1.097	1.225	0.002003
A0A1U8ICD9	probable steroid-binding protein 3 OS=Gossypium hirsutum OX=3635 GN=LOC107893471	LOC107893471	10.967	13.604	33	3	13	1	0.997	0.859	1.201	0.936	1.152	0.813	0.779	0.023378
A0A1U8ICE4	Histidinol dehydrogenase, chloroplastic OS=Gossypium hirsutum OX=3635 GN=LOC107895145	LOC107895145	47.397	-2	38.6	14	21	1	0.895	1.227	0.957	0.932	0.859	1.184	1.233	0.091395
A0A1U8ICF2	ATP-dependent zinc metalloprotease FTSH 12, chloroplastic-like OS=Gossypium hirsutum OX=3635 GN=LOC107895151	LOC107895151	113.37	49.262	14.2	11	13	11	1.07	0.882	1.085	0.915	1.086	0.92	0.838	0.0002368
A0A1U8ICF4	CBS domain-containing protein CBSX3, mitochondrial OS=Gossypium hirsutum OX=3635 GN=LOC107895150	LOC107895150	22.514	38.622	39.9	7	36	7	1.037	0.997	1.061	0.982	1.024	0.901	0.922	0.069918
A0A1U8ICG4	acetylglutamate kinase, chloroplastic-like OS=Gossypium hirsutum OX=3635 GN=LOC107895083	LOC107895083	38.148	13.344	19.4	6	9	1	1.128	0.922	1.085	0.951	1.038	0.856	0.839	0.0112219
A0A1U8ICG6	DNA damage-inducible protein 1-like isoform X1 OS=Gossypium hirsutum OX=3635 GN=LOC107895161	LOC107895161	44.868	113.09	43.7	16	27	4	0.991	1.088	0.974	1.009	0.987	0.988	1.045	0.2196
A0A1U8ICJ2	cytochrome P450 71D10-like OS=Gossypium hirsutum OX=3635 GN=LOC107895182	LOC107895182	58.039	40.93	16	8	8	7	1.138	0.886	1.081	0.909	1.088	0.871	0.806	0.0004567
A0A1U8ICL6	polyadenylate-binding protein RBP45C-like isoform X2 OS=Gossypium hirsutum OX=3635 GN=LOC107893524	LOC107893524	45.795	2.8049	17.8	7	12	1	1.06	1.033	0.918	0.962	1.105	0.931	0.949	0.47746
A0A1U8ICN3	Isocitrate dehydrogenase [NADP] OS=Gossypium hirsutum OX=3635 GN=LOC107893548	LOC107893548	47.135	2.1083	40.8	18	41	1	1.133	0.956	1.046	0.858	1.094	0.895	0.828	0.0083152
A0A1U8ICP1	vesicle-associated protein 2-2-like isoform X2 OS=Gossypium hirsutum OX=3635 GN=LOC107893155	LOC107893155	41.475	4.2189	9.6	4	4	4	0.803	1.267	0.874	1.126	0.827	1.181	1.427	0.00110102
A0A1U8ICR1	Glyceraldehyde-3-phosphate dehydrogenase OS=Gossypium hirsutum OX=3635 GN=LOC107895144	LOC107895144	45.129	5.5442	19.4	8	30	1	1.344	0.728	1.292	0.727	1.166	0.649	0.553	0.0004826
A0A1U8ICS7	sucrose-phosphatase 2-like OS=Gossypium hirsutum OX=3635 GN=LOC107893582	LOC107893582	47.966	32.681	31	13	18	3	1.307	0.8	1.145	0.703	1.086	0.911	0.682	0.0143593
A0A1U8ICV1	protein LIGHT-DEPENDENT SHORT HYPOCOTYLS 6-like isoform X2 OS=Gossypium hirsutum OX=3635 GN=LOC107893596	LOC107893596	24.708	7.3986	40.1	6	10	1
A0A1U8ICV5	ankyrin-1-like isoform X2 OS=Gossypium hirsutum OX=3635 GN=LOC107893212	LOC107893212	49.589	13.64	39	14	17	4	0.937	1.014	1.005	1.083	0.993	0.985	1.05	0.2425
A0A1U8ICW7	probable bifunctional methylthioribulose-1-phosphate dehydratase/enolase-phosphatase E1 isoform X2 OS=Gossypium hirsutum OX=3635 GN=LOC107895267	LOC107895267	36.103	13.596	12.9	3	3	2	1.12	0.949	1.044	0.952	0.992	0.937	0.899	0.097901
A0A1U8ICX5	protein disulfide-isomerase 5-3-like isoform X2 OS=Gossypium hirsutum OX=3635 GN=LOC107895188	LOC107895188	50.101	39.469	10.2	3	6	2	0.996	1.018	0.885	1.088	0.795	1.281	1.266	0.067295
A0A1U8ICZ6	probable nucleolar protein 5-2 OS=Gossypium hirsutum OX=3635 GN=LOC107893247	LOC107893247	46.556	29.969	19.7	7	10	2
A0A1U8ID01	glucan endo-1,3-beta-glucosidase 8-like OS=Gossypium hirsutum OX=3635 GN=LOC107893252	LOC107893252	52.687	25.523	14.9	5	8	4	0.778	1.188	0.929	1.075	0.879	1.279	1.37	0.012337
A0A1U8ID20	40S ribosomal protein S8 OS=Gossypium hirsutum OX=3635 GN=LOC107895223	LOC107895223	24.727	5.279	46.1	9	28	1	0.923	1.061	0.928	1.105	0.95	1.072	1.156	0.00065672
A0A1U8ID43	Auxin-repressed 12.5 kDa OS=Gossypium arboreum OX=29729 GN=F383_30533 PE=4 SV=1	LOC107893286	13.802	6.1272	15.9	2	2	2	1.293	0.599	1.233	0.754	1.355	0.664	0.52	0.0007955
A0A1U8ID50	UDP-arabinopyranose mutase 1-like OS=Gossypium hirsutum OX=3635 GN=LOC107893685	LOC107893685	41.279	4.0925	38.6	13	38	3	0.922	1.172	0.89	1.072	0.832	1.174	1.293	0.0037973
A0A1U8ID64	Serine/threonine-protein phosphatase 2A 55 kDa regulatory subunit B OS=Gossypium hirsutum OX=3635 GN=LOC107895343	LOC107895343	56.948	6.4345	16.9	9	11	2	1.031	0.96	0.964	1.056	0.998	1.008	1.01	0.78284
A0A1U8ID68	3-hydroxyisobutyryl-CoA hydrolase-like protein 3, mitochondrial OS=Gossypium hirsutum OX=3635 GN=LOC107893306	LOC107893306	41.369	106.55	47.8	17	33	4	0.985	1.084	0.993	1.164	0.953	0.912	1.078	0.39356
A0A1U8ID75	vesicle-fusing ATPase-like OS=Gossypium hirsutum OX=3635 GN=LOC107895350	LOC107895350	81.274	13.827	35.4	26	52	1	0.94	1.089	0.983	0.985	0.924	1.113	1.119	0.055976
A0A1U8ID83	leucine-rich repeat extensin-like protein 4 OS=Gossypium hirsutum OX=3635 GN=LOC107893317	LOC107893317	45.024	1.6718	2.9	1	1	1
A0A1U8IDC1	Gluconokinase OS=Gossypium barbadense OX=3634 GN=GOBAR_AA33941 PE=3 SV=1	LOC107895287	22.354	8.1819	13.8	2	2	1	0.925	1.096	0.946	1.066	0.9	1.111	1.181	0.00090392
A0A1U8IDD8	thiol protease aleurain-like OS=Gossypium hirsutum OX=3635 GN=LOC107893361	LOC107893361	38.967	61.702	17.5	5	23	3	0.859	1.199	0.91	1.131	0.869	1.131	1.312	0.00049672
A0A1U8IDE0	Adenine nucleotide alpha hydrolases-like superfamily protein isoform 1 OS=Theobroma cacao OX=3641 GN=TCM_031288 PE=4 SV=1	LOC107895299	24.132	30.806	34.1	8	12	3	0.858	1.043	0.885	1.017	1.036	1.079	1.13	0.109121
A0A1U8IDE8	Proteasome subunit alpha type OS=Gossypium hirsutum OX=3635 GN=LOC107893369	LOC107893369	27.293	-2	53.3	14	32	1
A0A1U8IDF7	Tubulin alpha chain OS=Gossypium hirsutum OX=3635 GN=LOC107893767	LOC107893767	49.665	6.9602	34.7	14	48	1	1.397	0.499	1.469	0.515	1.505	0.443	0.333	2.3473e-05
A0A1U8IDG4	conserved oligomeric Golgi complex subunit 3-like OS=Gossypium hirsutum OX=3635 GN=LOC107893379	LOC107893379	89.41	4.8572	12.2	9	12	1
A0A1U8IDI8	beta-fructofuranosidase, insoluble isoenzyme CWINV6-like OS=Gossypium hirsutum OX=3635 GN=LOC107893399	LOC107893399	66.648	72.682	23	11	16	9	0.848	1.154	0.911	1.131	0.801	1.229	1.373	0.0021015
A0A1U8IDL5	39S ribosomal protein L54, mitochondrial-like OS=Gossypium hirsutum OX=3635 GN=LOC107895538	LOC107895538	12.353	3.0403	18	2	2	2	1.012	0.849	1.132	0.963	1.106	0.914	0.839	0.024479
A0A1U8IDM0	callose synthase 5-like OS=Gossypium hirsutum OX=3635 GN=LOC107895542	LOC107895542	200.62	6.2033	2.1	3	3	1	1.028	0.934	0.992	0.965	0.964	1.138	1.018	0.83562
A0A1U8IDM3	40S ribosomal protein S12 OS=Gossypium hirsutum OX=3635 GN=LOC107893427	LOC107893427	14.656	56.572	58	9	47	1	0.933	1.062	0.891	1.122	0.95	1.024	1.156	0.0113971
A0A1U8IDM8	40S ribosomal protein S14-3 OS=Gossypium hirsutum OX=3635 GN=LOC107893403	LOC107893403	16.353	160.53	48.7	9	28	2	0.884	1.079	0.97	1.117	0.913	1.013	1.16	0.0199204
A0A1U8IDN7	probable cyclic nucleotide-gated ion channel 5 OS=Gossypium hirsutum OX=3635 GN=LOC107893439	LOC107893439	84.803	3.9434	3.8	3	3	2
A0A1U8IDU0	Exocyst subunit Exo70 family protein OS=Gossypium hirsutum OX=3635 GN=LOC107893478	LOC107893478	77.082	3.7583	3.7	2	2	2
A0A1U8IDV4	Proteasome subunit beta type OS=Gossypium hirsutum OX=3635 GN=LOC107893487	LOC107893487	25.408	8.8986	54.5	13	38	1	0.875	1.105	0.936	1.063	0.982	1.079	1.163	0.0127166
A0A1U8IE05	la-related protein 1C-like OS=Gossypium hirsutum OX=3635 GN=LOC107895700	LOC107895700	55.958	4.825	5.7	2	2	2	0.905	1.141	1.059	1.007	0.925	0.983	1.084	0.2974
A0A1U8IE24	FHA domain-containing protein DDL-like isoform X4 OS=Gossypium hirsutum OX=3635 GN=LOC107893531	LOC107893531	43.188	5.1203	5.6	2	2	2	0.702	1.275	0.79	1.289	0.776	1.275	1.693	0.0048616
A0A1U8IE54	probable methyltransferase PMT2 OS=Gossypium hirsutum OX=3635 GN=LOC107893952	LOC107893952	69.958	17.446	32.6	18	28	1	0.839	1.183	0.887	1.041	0.785	1.348	1.423	0.0135016
A0A1U8IE59	UDP-glucose 4-epimerase GEPI48-like OS=Gossypium hirsutum OX=3635 GN=LOC107893957	LOC107893957	38.572	2.3198	37	11	15	1
A0A1U8IE67	3-dehydroquinate synthase, chloroplastic-like isoform X2 OS=Gossypium hirsutum OX=3635 GN=LOC107895768	LOC107895768	47.441	4.3554	20.7	9	15	2	1.041	0.905	1.072	1.012	1.074	0.936	0.895	0.032036
A0A1U8IE74	mannosylglycoprotein endo-beta-mannosidase-like isoform X2 OS=Gossypium hirsutum OX=3635 GN=LOC107893587	LOC107893587	96.549	1.3382	2	2	3	1
A0A1U8IE99	THO complex subunit 6-like OS=Gossypium hirsutum OX=3635 GN=LOC107895807	LOC107895807	36.668	10.126	10.8	2	2	2	1.024	0.861	1.058	0.885	1.137	1.023	0.86	0.069005
A0A1U8IEB6	monosaccharide-sensing protein 2-like OS=Gossypium hirsutum OX=3635 GN=LOC107894004	LOC107894004	79.035	5.776	6	3	3	0
A0A1U8IEB7	acyl-CoA-binding domain-containing protein 4-like OS=Gossypium hirsutum OX=3635 GN=LOC107893626	LOC107893626	74.233	56.398	18.6	12	16	3	1.067	0.999	1.054	0.887	1.043	0.941	0.893	0.031237
A0A1U8IEC6	At4g35360/F23E12_80 OS=Arabidopsis thaliana OX=3702 GN=At4g35360 PE=1 SV=1	LOC107894008	40.893	101.48	38.7	15	24	4	1.011	1.033	0.978	0.985	0.973	0.995	1.017	0.41698
A0A1U8IEE8	Nucleic acid-binding, OB-fold-like protein OS=Theobroma cacao OX=3641 GN=TCM_010354 PE=4 SV=1	LOC107894018	15.291	18.189	25.7	4	7	2	0.903	1.092	0.965	1.062	0.975	1.02	1.116	0.023963
A0A1U8IEF1	Pyruvate kinase OS=Gossypium hirsutum OX=3635 GN=LOC107894021	LOC107894021	54.945	7.4427	27.8	14	34	2	1.135	0.873	1.162	0.851	1.069	0.863	0.769	0.00053637
A0A1U8IEF5	CCR4-NOT transcription complex subunit 3-like isoform X4 OS=Gossypium hirsutum OX=3635 GN=LOC107893651	LOC107893651	96.525	7.4455	15.6	12	14	1	0.976	0.86	0.995	1.164	1.039	0.976	0.997	0.9105
A0A1U8IEF6	ankyrin repeat domain-containing protein 2A-like OS=Gossypium hirsutum OX=3635 GN=LOC107894025	LOC107894025	39.181	126.91	49.2	15	40	9	1.024	0.979	1.043	0.984	1.065	0.922	0.921	0.025635
A0A1U8IEK6	monodehydroascorbate reductase 4, peroxisomal-like OS=Gossypium hirsutum OX=3635 GN=LOC107895776	LOC107895776	59.884	3.5369	4	2	2	2
A0A1U8IEL7	major pollen allergen Bet v 1-F/I-like OS=Gossypium hirsutum OX=3635 GN=LOC107895962	LOC107895962	17.365	14.305	31.4	4	47	2	0.133	2.742	0.178	1.359	0.162	1.776	12.425	0.00036092
A0A1U8IEM9	major pollen allergen Bet v 1-E-like OS=Gossypium hirsutum OX=3635 GN=LOC107895972	LOC107895972	17.352	38.756	57.9	9	64	3	0.553	2.148	0.602	1.089	0.671	1.099	2.375	0.024597
A0A1U8IEP1	Proteasome subunit alpha type OS=Gossypium hirsutum OX=3635 GN=LOC107895982	LOC107895982	27.175	95.358	52.2	14	30	1	1.024	1.022	0.983	1.046	0.941	1.005	1.042	0.195144
A0A1U8IER0	vam6/Vps39-like protein OS=Gossypium hirsutum OX=3635 GN=LOC107896015	LOC107896015	111.06	49.914	15.7	13	17	2	1.18	0.913	1.09	0.884	1.014	0.896	0.82	0.0117784
A0A1U8IES8	L-arabinokinase-like OS=Gossypium hirsutum OX=3635 GN=LOC107894141	LOC107894141	109.01	177.65	24.3	21	30	21	1.026	1.013	0.946	1.018	0.882	1.1	1.097	0.140803
A0A1U8IEZ0	F-box protein SKIP22-like OS=Gossypium hirsutum OX=3635 GN=LOC107894200	LOC107894200	53.608	3.6921	5.5	2	3	2	1.151	0.813	1.166	0.83	1.135	0.859	0.725	5.7656e-05
A0A1U8IEZ9	Histone H2A OS=Gossypium hirsutum OX=3635 GN=LOC107894206	LOC107894206	15.113	14.634	24.3	5	9	2	1.369	0.955	1.309	0.599	0.846	0.867	0.687	0.149639
A0A1U8IF32	B3 domain-containing transcription factor VRN1-like isoform X2 OS=Gossypium hirsutum OX=3635 GN=LOC107894223	LOC107894223	39.628	3.8723	18	6	7	1	1.222	0.788	1.094	0.909	1.115	0.832	0.737	0.0047585
A0A1U8IF38	F-box only 46 OS=Gossypium arboreum OX=29729 GN=F383_34356 PE=4 SV=1	LOC107893855	10.335	24.469	30.3	2	4	2	1.225	0.784	1.302	0.727	1.214	0.658	0.58	0.00058266
A0A1U8IF61	cytochrome P450 CYP749A22-like OS=Gossypium hirsutum OX=3635 GN=LOC107894247	LOC107894247	60.341	12.078	17	7	9	1
A0A1U8IF77	nascent polypeptide-associated complex subunit alpha-like protein 1 OS=Gossypium hirsutum OX=3635 GN=LOC107896221	LOC107896221	22.848	-2	56	7	17	1
A0A1U8IF81	ferredoxin--nitrite reductase, chloroplastic isoform X1 OS=Gossypium hirsutum OX=3635 GN=LOC107894267	LOC107894267	65.72	225.72	42.5	23	57	23	0.893	1.132	0.863	1.126	0.887	1.14	1.286	2.1043e-05
A0A1U8IF83	sucrose nonfermenting 4-like protein isoform X2 OS=Gossypium hirsutum OX=3635 GN=LOC107894262	LOC107894262	49.511	2.0809	9.8	4	4	2
A0A1U8IF92	Lon protease homolog, mitochondrial OS=Gossypium hirsutum OX=3635 GN=LOC107893893	LOC107893893	107.18	147.31	28.5	25	36	5	1.096	0.894	0.987	0.833	1.078	1.115	0.899	0.29328
A0A1U8IF93	PI-PLC X domain-containing protein At5g67130-like OS=Gossypium hirsutum OX=3635 GN=LOC107894277	LOC107894277	46.722	44.33	17.3	7	10	6	1.248	0.839	1.114	0.976	0.862	0.981	0.867	0.33184
A0A1U8IFB7	Methionine aminopeptidase OS=Gossypium hirsutum OX=3635 GN=LOC107893909	LOC107893909	44.031	4.1201	26.2	7	8	1	1.068	0.874	1.039	1.015	1.014	0.988	0.922	0.160482
A0A1U8IFC9	protein TIC 21, chloroplastic OS=Gossypium hirsutum OX=3635 GN=LOC107894301	LOC107894301	29.764	1.3992	2.5	1	1	1	0.873	0.915	1.124	0.791	1.218	1.066	0.862	0.33186
A0A1U8IFD5	ubiquitin carboxyl-terminal hydrolase 13-like isoform X3 OS=Gossypium hirsutum OX=3635 GN=LOC107896257	LOC107896257	128.61	229.7	37.6	42	73	3
A0A1U8IFE0	Glycosyltransferase OS=Gossypium hirsutum OX=3635 GN=LOC107893931	LOC107893931	48.639	112.58	37.5	13	20	7	1.463	0.558	1.289	0.544	1.451	0.531	0.389	2.3144e-05
A0A1U8IFF6	MATH domain and coiled-coil domain-containing protein At3g58270-like OS=Gossypium hirsutum OX=3635 GN=LOC107896272	LOC107896272	48.347	17.895	12.3	5	5	5	0.626	1.41	0.614	1.428	0.645	1.439	2.269	3.8382e-07
A0A1U8IFF8	charged multivesicular body protein 5-like OS=Gossypium hirsutum OX=3635 GN=LOC107896276	LOC107896276	25.817	16.86	13.5	4	4	3	1.038	0.919	1.139	0.808	1.117	0.954	0.814	0.022801
A0A1U8IFF9	Peroxidase OS=Gossypium hirsutum OX=3635 GN=LOC107893939	LOC107893939	37.148	1.9276	13	4	12	1	0.521	1.362	0.653	1.387	0.552	1.711	2.584	0.00068106
A0A1U8IFG9	Golgin subfamily A member 4 OS=Theobroma cacao OX=3641 GN=TCM_037132 PE=4 SV=1	LOC107893945	83.329	4.447	2.7	2	2	2	1.32	0.677	1.25	0.682	1.302	0.67	0.524	1.4843e-06
A0A1U8IFH4	Exocyst subunit Exo70 family protein OS=Gossypium hirsutum OX=3635 GN=LOC107896286	LOC107896286	73.356	4.633	29.2	17	18	2	1.103	0.944	1.015	0.928	0.99	1.025	0.932	0.192518
A0A1U8IFI4	dynamin-related protein 5A-like OS=Gossypium hirsutum OX=3635 GN=LOC107893959	LOC107893959	68.426	47.276	41.6	25	39	2	0.86	1.161	0.775	1.179	0.799	1.322	1.505	0.00135882
A0A1U8IFJ7	Signal recognition particle subunit SRP72 OS=Gossypium hirsutum OX=3635 GN=LOC107893969	LOC107893969	73.366	7.9851	34.9	18	23	3	0.911	1.075	0.943	1.161	0.906	1.042	1.188	0.0076996
A0A1U8IFL6	Dihydrolipoamide acetyltransferase component of pyruvate dehydrogenase complex OS=Gossypium hirsutum OX=3635 GN=LOC107896312	LOC107896312	69.366	65.032	34.3	20	32	3	1.057	1.035	0.99	0.937	0.959	1.003	0.99	0.81236
A0A1U8IFP4	bifunctional protein FolD 4, chloroplastic-like OS=Gossypium hirsutum OX=3635 GN=LOC107896280	LOC107896280	38.98	2.9982	21.5	7	14	1	0.915	1.097	0.999	1.022	0.983	1.009	1.08	0.109938
A0A1U8IFQ9	GATA zinc finger domain-containing protein C1393.08 isoform 1 OS=Theobroma cacao OX=3641 GN=TCM_022629 PE=4 SV=1	LOC107896346	52.49	24.762	9.9	4	5	4	1.065	0.896	1.045	0.99	1.056	0.953	0.897	0.0206
A0A1U8IFR5	Small nuclear ribonucleoprotein G OS=Gossypium hirsutum OX=3635 GN=LOC107896350	LOC107896350	8.9384	7.5167	41.2	4	7	1
A0A1U8IFR6	pentatricopeptide repeat-containing protein At4g38150-like OS=Gossypium hirsutum OX=3635 GN=LOC107894013	LOC107894013	34.216	10.543	17.6	4	4	1
A0A1U8IFS0	copper transport protein ATX1-like OS=Gossypium hirsutum OX=3635 GN=LOC107896296	LOC107896296	8.6839	12.122	72	5	13	2	0.948	1.033	0.912	0.978	1.076	1.094	1.058	0.38904
A0A1U8IFS9	zinc finger CCCH domain-containing protein 20-like OS=Gossypium hirsutum OX=3635 GN=LOC107894456	LOC107894456	33.668	2.587	3.9	1	1	1
A0A1U8IFT1	E3 ubiquitin-protein ligase KEG-like OS=Gossypium hirsutum OX=3635 GN=LOC107896362	LOC107896362	181.43	1.5941	11.7	16	20	1
A0A1U8IFV1	aspartic proteinase nepenthesin-1-like OS=Gossypium hirsutum OX=3635 GN=LOC107894477	LOC107894477	52.006	59.203	13.5	5	10	5	1.246	0.871	1.33	0.947	0.88	0.658	0.716	0.122998
A0A1U8IFW2	NADH dehydrogenase [ubiquinone] 1 alpha subcomplex subunit 6-like OS=Gossypium hirsutum OX=3635 GN=LOC107896380	LOC107896380	15.043	56.217	60.6	8	23	3	1.019	1.024	1.092	0.993	1.006	0.858	0.922	0.23972
A0A1U8IFW4	Succinate--CoA ligase [ADP-forming] subunit alpha, mitochondrial OS=Gossypium hirsutum OX=3635 GN=LOC107894049	LOC107894049	34.999	156.93	35.2	11	25	1	0.929	1.056	0.864	1.116	0.898	1.196	1.252	0.005823
A0A1U8IFW5	40S ribosomal protein S14-like OS=Gossypium hirsutum OX=3635 GN=LOC107896336	LOC107896336	16.396	12.584	46.7	8	29	1	0.867	1.139	0.894	1.155	0.84	1.171	1.332	0.000124291
A0A1U8IFX1	aspartyl protease AED3-like isoform X1 OS=Gossypium hirsutum OX=3635 GN=LOC107896384	LOC107896384	45.629	84.309	32.5	11	29	7	1.063	1.016	1.155	1.048	0.962	0.776	0.893	0.33624
A0A1U8IFX9	Reverse transcriptase OS=Corchorus capsularis OX=210143 GN=CCACVL1_24647 PE=4 SV=1	LOC107894513	122.75	-2	0.8	1	1	1	1.01	1.09	0.973	1.009	0.968	0.969	1.04	0.36422
A0A1U8IFY3	DNA-directed RNA polymerase III subunit RPC5-like isoform X2 OS=Gossypium hirsutum OX=3635 GN=LOC107896374	LOC107896374	77.343	6.6865	9.4	6	7	6	1.165	0.903	1.07	0.841	1.067	0.934	0.811	0.0077195
A0A1U8IFY4	rRNA N-glycosidase OS=Gossypium hirsutum OX=3635 GN=LOC107894520	LOC107894520	60.079	-2	6.8	4	8	1	0.61	1.457	0.631	1.424	0.66	1.375	2.239	4.5566e-06
A0A1U8IFZ5	Protein FAM75A4 OS=Gossypium arboreum OX=29729 GN=F383_10666 PE=4 SV=1	LOC107896341	18.379	4.0947	12.4	1	1	1
A0A1U8IG07	Trihelix transcription factor OS=Gossypium hirsutum OX=3635 GN=LOC107896395	LOC107896395	40.904	5.4612	4.3	1	1	1	1.257	0.617	1.424	0.659	1.329	0.586	0.464	0.000100864
A0A1U8IG08	Glutathione peroxidase OS=Gossypium hirsutum OX=3635 GN=LOC107894104	LOC107894104	17.973	2.1361	44.5	7	15	1	1.13	0.833	1.165	0.907	1.155	0.761	0.725	0.0032551
A0A1U8IG38	germin-like protein subfamily T member 2 isoform X1 OS=Gossypium hirsutum OX=3635 GN=LOC107896426	LOC107896426	23.581	3.4277	5	1	2	1
A0A1U8IG39	Histone H2A OS=Gossypium hirsutum OX=3635 GN=LOC107894572	LOC107894572	14.731	10.432	25	5	10	1	1.107	0.809	1.224	1.096	0.776	0.977	0.928	0.71408
A0A1U8IG46	Lipoyl synthase, mitochondrial OS=Gossypium hirsutum OX=3635 GN=LOC107894131	LOC107894131	41.437	1.1465	4	2	2	2
A0A1U8IG60	nephrocystin-3-like OS=Gossypium hirsutum OX=3635 GN=LOC107896447	LOC107896447	63.739	99.34	30.2	15	20	2	1.35	0.659	1.278	0.671	1.206	0.742	0.54	0.00023744
A0A1U8IG65	dynamin-related protein 12A OS=Gossypium hirsutum OX=3635 GN=LOC107896456	LOC107896456	68.425	141.87	41.1	25	43	5	1.032	1.002	1.016	0.979	0.999	0.978	0.971	0.075579
A0A1U8IG77	Membrane protein OS=Gossypium arboreum OX=29729 GN=F383_22566 PE=4 SV=1	LOC107894146	93.055	4.3274	11	8	11	1	0.997	1.022	1.034	1.012	1.017	0.923	0.97	0.4116
A0A1U8IG78	Reticulon-like protein OS=Gossypium hirsutum OX=3635 GN=LOC107896467	LOC107896467	28.161	2.7962	11.7	4	6	1	1.085	1.158	1.09	0.895	0.932	0.834	0.929	0.51024
A0A1U8IG83	40S ribosomal protein S10-like OS=Gossypium hirsutum OX=3635 GN=LOC107896471	LOC107896471	19.615	21.225	47.5	9	35	1	0.994	0.989	0.972	1.029	1.022	1.01	1.013	0.50928
A0A1U8IG94	glutamate--cysteine ligase, chloroplastic-like OS=Gossypium hirsutum OX=3635 GN=LOC107896479	LOC107896479	59.192	60.73	22.8	10	22	2	1.045	0.832	1.095	0.979	1.08	0.952	0.858	0.040676
A0A1U8IG99	RNA-binding protein NOB1-like OS=Gossypium hirsutum OX=3635 GN=LOC107896482	LOC107896482	69.621	1.0127	2.2	1	1	1
A0A1U8IGA5	protein FAM63A-like OS=Gossypium hirsutum OX=3635 GN=LOC107896488	LOC107896488	78.09	20.426	9.7	6	6	3	1.077	0.816	1.22	0.811	1.181	0.843	0.71	0.00096179
A0A1U8IGB4	Kinesin-like protein OS=Gossypium hirsutum OX=3635 GN=LOC107896502	LOC107896502	99.811	9.6008	5.5	4	4	4	0.992	0.953	1.048	1.107	0.957	0.951	1.005	0.96316
A0A1U8IGC4	monocopper oxidase-like protein SKU5 OS=Gossypium hirsutum OX=3635 GN=LOC107896511	LOC107896511	66.675	-2	13.2	6	10	1
A0A1U8IGC6	hsp70-Hsp90 organizing protein 3-like OS=Gossypium hirsutum OX=3635 GN=LOC107896512	LOC107896512	65.174	9.3972	58.8	36	80	4	0.924	1.054	0.997	0.948	1.076	0.977	0.994	0.92952
A0A1U8IGC8	21 kDa protein-like OS=Gossypium hirsutum OX=3635 GN=LOC107896509	LOC107896509	23.067	3.3019	4.9	1	3	1	0.888	0.99	0.913	1.044	0.904	1.32	1.24	0.144781
A0A1U8IGC9	cysteine--tRNA ligase 2, cytoplasmic-like OS=Gossypium hirsutum OX=3635 GN=LOC107894671	LOC107894671	35.45	1.2252	18	5	9	1	1.148	0.969	1.03	0.925	1.031	0.886	0.866	0.032164
A0A1U8IGD2	3-oxoacyl-[acyl-carrier-protein] synthase 3 A, chloroplastic-like isoform X2 OS=Gossypium hirsutum OX=3635 GN=LOC107896515	LOC107896515	36.25	61.854	26.3	7	9	5	0.843	1.183	0.878	1.213	0.809	1.147	1.4	0.00029907
A0A1U8IGE6	vesicle-associated protein 1-2-like OS=Gossypium hirsutum OX=3635 GN=LOC107896521	LOC107896521	26.087	18.685	32.1	8	10	5	0.993	0.986	1.074	0.921	1.041	0.954	0.921	0.051641
A0A1U8IGE7	probable N-acetyl-gamma-glutamyl-phosphate reductase, chloroplastic OS=Gossypium hirsutum OX=3635 GN=LOC107894692	LOC107894692	61.3	2.1775	8.9	4	8	1	1.006	1.031	1.04	0.998	0.944	0.994	1.011	0.72354
A0A1U8IGF5	protein SSUH2 homolog OS=Gossypium hirsutum OX=3635 GN=LOC107894211	LOC107894211	47.642	4.3231	8.3	3	3	1	0.93	1.065	0.791	1.213	0.801	1.284	1.412	0.0104766
A0A1U8IGF6	Phospho-2-dehydro-3-deoxyheptonate aldolase OS=Gossypium hirsutum OX=3635 GN=LOC107896529	LOC107896529	56.966	67.582	29.8	15	30	11	1.053	0.868	1.063	0.932	1.096	0.944	0.854	0.0053569
A0A1U8IGF8	Peptidyl-prolyl cis-trans isomerase-like 3 OS=Gossypium arboreum OX=29729 GN=F383_10966 PE=4 SV=1	LOC107896531	38.009	1.695	2.3	1	1	1
A0A1U8IGI4	ras-related protein Rab7-like OS=Gossypium hirsutum OX=3635 GN=LOC107894230	LOC107894230	23.197	24.75	59.4	11	25	1	0.896	1.064	1.041	0.912	1.151	0.935	0.943	0.5544
A0A1U8IGI9	Protein transport protein SEC23 OS=Gossypium hirsutum OX=3635 GN=LOC107896564	LOC107896564	84.301	47.919	19.3	12	18	2
A0A1U8IGJ2	cleavage and polyadenylation specificity factor subunit 3-I OS=Gossypium hirsutum OX=3635 GN=LOC107894243	LOC107894243	77.247	58.473	21.2	12	16	12	1.023	0.95	1.053	0.947	1.003	0.989	0.937	0.031125
A0A1U8IGJ6	peptidyl-prolyl cis-trans isomerase CYP40-like isoform X2 OS=Gossypium hirsutum OX=3635 GN=LOC107894252	LOC107894252	41.614	1.0829	28.2	9	18	1
A0A1U8IGM9	elongator complex protein 2-like OS=Gossypium hirsutum OX=3635 GN=LOC107896574	LOC107896574	92.454	6.8676	5.4	5	5	5	1	1.051	1.017	1.006	0.957	0.985	1.023	0.4397
A0A1U8IGN0	H4/H2A histone acetyltransferase complex OS=Theobroma cacao OX=3641 GN=TCM_011561 PE=4 SV=1	LOC107896575	14.592	3.6772	17.6	2	3	2	1.181	0.88	1.085	0.848	1.15	0.818	0.745	0.00085658
A0A1U8IGN9	22.0 kDa class IV heat shock protein-like OS=Gossypium hirsutum OX=3635 GN=LOC107894831	LOC107894831	18.899	2.5832	6.6	1	1	1	0.622	1.34	0.76	1.482	0.708	1.211	1.93	0.00135847
A0A1U8IGR3	Phytochrome OS=Gossypium hirsutum OX=3635 GN=LOC107896595	LOC107896595	127.29	23.033	26.4	23	27	3	1.408	0.79	1.165	0.674	1.255	0.617	0.544	0.0025407
A0A1U8IGS4	LOW QUALITY PROTEIN: uncharacterized transmembrane protein DDB_G0289901 OS=Gossypium hirsutum OX=3635 GN=LOC107896653	LOC107896653	53.194	32.168	14.8	7	9	7	1.003	0.997	1.044	1.031	0.989	0.965	0.986	0.59706
A0A1U8IGT0	beta-D-xylosidase 1-like OS=Gossypium hirsutum OX=3635 GN=LOC107896612	LOC107896612	83.311	45.303	12.4	8	12	5	1.335	0.805	1.24	0.92	0.717	0.958	0.815	0.4457
A0A1U8IGT1	major pollen allergen Bet v 1-A-like OS=Gossypium hirsutum OX=3635 GN=LOC107896610	LOC107896610	17.328	81.727	63.5	8	23	7	1	0.898	0.965	0.791	1.388	0.934	0.782	0.136817
A0A1U8IGT5	GTP-binding protein SAR1A-like OS=Gossypium hirsutum OX=3635 GN=LOC107896616	LOC107896616	22.057	35.744	45.1	9	21	1	0.871	1.007	0.952	0.963	0.957	1.3	1.176	0.191705
A0A1U8IGV8	bifunctional epoxide hydrolase 2-like OS=Gossypium hirsutum OX=3635 GN=LOC107896684	LOC107896684	36.438	6.9193	17	4	4	4	0.824	1.197	0.741	1.289	0.802	1.247	1.577	0.00028356
A0A1U8IGX2	peroxisomal fatty acid beta-oxidation multifunctional protein MFP2-like OS=Gossypium hirsutum OX=3635 GN=LOC107896697	LOC107896697	79.246	9.4303	19.7	13	20	2	1.184	0.81	1.115	0.792	1.203	0.848	0.7	0.00030497
A0A1U8IGX3	Eukaryotic translation initiation factor 3 subunit J OS=Gossypium hirsutum OX=3635 GN=LOC107896643	LOC107896643	25.109	36.255	31.1	7	13	5	1.062	0.954	1.026	0.996	1.026	0.957	0.934	0.0187418
A0A1U8IGY4	topless-related protein 2 isoform X2 OS=Gossypium hirsutum OX=3635 GN=LOC107896646	LOC107896646	124.41	43.809	21	20	25	10	1.138	0.874	1.062	0.913	1.057	0.902	0.826	0.0021555
A0A1U8IH02	protein NRT1/ PTR FAMILY 4.3-like OS=Gossypium hirsutum OX=3635 GN=LOC107896659	LOC107896659	66.187	1.111	2.5	1	1	1
A0A1U8IH23	Cytospin-A OS=Gossypium arboreum OX=29729 GN=F383_20074 PE=4 SV=1	LOC107896675	16.712	27.72	48.3	8	9	8	1.011	0.917	1.137	0.919	1.098	0.87	0.834	0.0098566
A0A1U8IH68	stromal 70 kDa heat shock-related protein, chloroplastic-like OS=Gossypium hirsutum OX=3635 GN=LOC107896771	LOC107896771	75.035	18.195	38.9	29	63	0
A0A1U8IH69	serine acetyltransferase 5-like OS=Gossypium hirsutum OX=3635 GN=LOC107894457	LOC107894457	24.31	1.6294	3.9	1	2	1	1.09	0.946	1.061	0.87	1.004	1.026	0.901	0.117737
A0A1U8IH87	protein SRG1-like OS=Gossypium hirsutum OX=3635 GN=LOC107896707	LOC107896707	40.683	2.406	6.1	2	2	2
A0A1U8IHA4	endochitinase EP3-like OS=Gossypium hirsutum OX=3635 GN=LOC107896799	LOC107896799	29.343	247.14	55.3	13	60	2	0.496	1.576	0.476	1.698	0.528	1.433	3.138	3.9104e-05
A0A1U8IHC3	alpha-soluble NSF attachment protein-like OS=Gossypium hirsutum OX=3635 GN=LOC107896736	LOC107896736	32.536	15.725	50.7	13	24	2	1.024	0.922	0.99	1.024	1.061	0.984	0.953	0.25234
A0A1U8IHD2	GRF1-interacting factor 1-like isoform X1 OS=Gossypium hirsutum OX=3635 GN=LOC107895071	LOC107895071	19.269	20.452	17.1	3	3	1	1.46	0.5	1.447	0.558	1.491	0.371	0.325	0.0113392
A0A1U8IHE7	Reticulon-like protein OS=Gossypium hirsutum OX=3635 GN=LOC107896832	LOC107896832	27.889	1.5868	19.4	5	7	1	1.124	0.786	1.028	0.983	1.226	0.819	0.766	0.03478
A0A1U8IHF5	60S ribosomal protein L5-like OS=Gossypium hirsutum OX=3635 GN=LOC107896769	LOC107896769	34.216	-2	28.1	8	15	1
A0A1U8IHH2	Protein translocase subunit SecA OS=Gossypium arboreum OX=29729 GN=F383_12714 PE=4 SV=1	LOC107896782	21.092	6.0668	9.8	1	1	1
A0A1U8IHH8	BnaA07g37920D protein OS=Brassica napus OX=3708 GN=BnaA07g37920D PE=4 SV=1	LOC107896853	84.579	11.798	6.9	5	6	5	0.899	1.079	1.156	0.994	0.977	0.891	0.978	0.83766
A0A1U8IHI8	alcohol dehydrogenase 1B-like OS=Gossypium hirsutum OX=3635 GN=LOC107896861	LOC107896861	46.792	13.007	30.2	10	19	1
A0A1U8IHJ1	Lysine--tRNA ligase OS=Gossypium hirsutum OX=3635 GN=LOC107896796	LOC107896796	69.103	65.088	34.5	23	46	4	0.99	0.865	0.967	1.05	1.034	1.136	1.02	0.87634
A0A1U8IHK0	F-box/kelch-repeat protein At3g23880-like isoform X2 OS=Gossypium hirsutum OX=3635 GN=LOC107896790	LOC107896790	37.49	10.628	9.2	2	3	2	0.82	1.245	0.808	1.177	0.785	1.257	1.525	6.1791e-05
A0A1U8IHK6	Non-specific lipid-transfer protein OS=Gossypium hirsutum OX=3635 GN=LOC107896814	LOC107896814	11.859	44.076	55.8	5	47	3	1.154	0.783	1.21	0.74	1.242	0.722	0.623	0.000122223
A0A1U8IHK7	endochitinase EP3-like OS=Gossypium hirsutum OX=3635 GN=LOC107896798	LOC107896798	29.499	2.6172	13.9	3	14	1	0.651	1.454	0.545	1.677	0.558	1.287	2.519	0.00062204
A0A1U8IHL6	histidine--tRNA ligase, chloroplastic/mitochondrial-like OS=Gossypium hirsutum OX=3635 GN=LOC107894617	LOC107894617	42.542	8.1478	6.4	2	2	2	1.006	0.941	0.973	1.065	0.965	1.074	1.046	0.38426
A0A1U8IHQ9	probable galactinol--sucrose galactosyltransferase 1 OS=Gossypium hirsutum OX=3635 GN=LOC107895160	LOC107895160	83.25	9.2419	3.6	2	2	1	1.063	0.974	0.959	1.041	0.859	1.139	1.095	0.29392
A0A1U8IHT5	serine/threonine-protein kinase SRK2A-like OS=Gossypium hirsutum OX=3635 GN=LOC107896865	LOC107896865	31.811	5.9306	23.7	6	8	4	1.037	0.985	1.058	0.908	0.93	1.095	0.988	0.84918
A0A1U8IHT9	conserved oligomeric Golgi complex subunit 5-like OS=Gossypium hirsutum OX=3635 GN=LOC107896914	LOC107896914	91.68	5.9863	18.9	15	26	2	1.084	0.956	0.951	0.99	0.999	1.034	0.982	0.72116
A0A1U8IHV5	shikimate O-hydroxycinnamoyltransferase-like OS=Gossypium hirsutum OX=3635 GN=LOC107896899	LOC107896899	48.548	1.67	22.9	10	18	1
A0A1U8IHW8	calmodulin-like protein 7 OS=Gossypium hirsutum OX=3635 GN=LOC107896932	LOC107896932	24.238	2.7078	4.2	1	1	1	1.34	0.647	1.428	0.607	1.311	0.533	0.438	0.000184021
A0A1U8IHX1	65-kDa microtubule-associated protein 1-like OS=Gossypium hirsutum OX=3635 GN=LOC107895215	LOC107895215	65.031	133.04	28.4	17	27	2	0.852	1.069	0.814	1.175	0.939	1.221	1.33	0.0077969
A0A1U8II15	Protein translocase subunit SecA OS=Gossypium arboreum OX=29729 GN=F383_22372 PE=4 SV=1	LOC107894842	25.112	5.946	17.1	3	3	2	0.936	1.074	0.943	1.099	0.928	1.058	1.151	0.00030124
A0A1U8II21	UTP--glucose-1-phosphate uridylyltransferase-like isoform X2 OS=Gossypium hirsutum OX=3635 GN=LOC107895238	LOC107895238	48.588	323.31	64.6	25	100	3	0.958	1.029	0.951	1.02	0.999	0.997	1.047	0.061041
A0A1U8II41	OPA3-like protein OS=Gossypium hirsutum OX=3635 GN=LOC107896958	LOC107896958	18.946	2.4523	11.8	2	2	2
A0A1U8II52	thioredoxin-like OS=Gossypium hirsutum OX=3635 GN=LOC107895276	LOC107895276	19.33	6.9098	22.4	4	4	2	0.936	1.032	1.06	1.031	0.988	0.964	1.014	0.74026
A0A1U8II60	uridine 5'-monophosphate synthase-like OS=Gossypium hirsutum OX=3635 GN=LOC107895284	LOC107895284	51.361	12.882	26.6	12	24	2	0.963	1.183	0.874	1.168	0.88	0.98	1.226	0.0422
A0A1U8II62	sterol 14-demethylase-like OS=Gossypium hirsutum OX=3635 GN=LOC107896963	LOC107896963	55.589	2.1786	8.2	3	3	1
A0A1U8II68	Beta-galactosidase OS=Gossypium hirsutum OX=3635 GN=LOC107896979	LOC107896979	79.38	1.3932	22.6	14	19	2	1.091	0.973	0.961	1.041	0.881	1.08	1.055	0.46082
A0A1U8II72	Adenosylhomocysteinase OS=Gossypium hirsutum OX=3635 GN=LOC107896986	LOC107896986	53.106	53.081	51.1	24	99	0
A0A1U8IIA5	cysteine desulfurase, mitochondrial-like OS=Gossypium hirsutum OX=3635 GN=LOC107897040	LOC107897040	49.972	56.774	35.1	13	21	1	1.104	0.903	0.939	0.998	1.068	0.994	0.931	0.29898
A0A1U8IIB5	Peptidyl-prolyl cis-trans isomerase OS=Gossypium hirsutum OX=3635 GN=LOC107897020	LOC107897020	20.579	1.4811	28	6	7	1
A0A1U8IIC7	far upstream element-binding protein 1-like OS=Gossypium hirsutum OX=3635 GN=LOC107895341	LOC107895341	69.32	2.0444	28.1	15	25	1
A0A1U8IID9	Histidinol dehydrogenase, chloroplastic OS=Gossypium hirsutum OX=3635 GN=LOC107897037	LOC107897037	47.386	104.98	39.7	14	21	1
A0A1U8IIE0	flowering locus K homology domain-like isoform X2 OS=Gossypium hirsutum OX=3635 GN=LOC107894991	LOC107894991	46.028	51.71	35.7	14	21	0
A0A1U8IIE7	salicylic acid-binding protein 2-like OS=Gossypium hirsutum OX=3635 GN=LOC107897087	LOC107897087	29.544	39.122	15.2	3	5	1
A0A1U8IIF3	Malic enzyme OS=Gossypium hirsutum OX=3635 GN=LOC107897092	LOC107897092	63.747	169.84	48.8	24	40	1
A0A1U8IIF8	nuclear pore complex protein NUP85-like OS=Gossypium hirsutum OX=3635 GN=LOC107897098	LOC107897098	80.353	15.631	14	8	10	1	1	0.935	1.047	0.981	1.021	1.021	0.957	0.199064
A0A1U8III4	ATP-dependent 6-phosphofructokinase OS=Gossypium hirsutum OX=3635 GN=LOC107897082	LOC107897082	53.828	97.419	36.3	18	30	2	1.156	0.935	0.966	0.959	1.102	0.871	0.858	0.067655
A0A1U8IIK3	Acyl carrier protein OS=Gossypium hirsutum OX=3635 GN=LOC107895029	LOC107895029	14.606	4.668	8.8	1	1	1
A0A1U8IIK5	tryptophan--tRNA ligase, chloroplastic/mitochondrial-like isoform X4 OS=Gossypium hirsutum OX=3635 GN=LOC107897091	LOC107897091	40.836	3.8656	4.6	1	1	1
A0A1U8IIM8	Cation-transporting ATPase OS=Gossypium hirsutum OX=3635 GN=LOC107895049	LOC107895049	131.77	5.6573	17.4	20	26	3	0.569	0.681	0.889	0.546	2.58	0.625	0.459	0.33192
A0A1U8IIN7	Peptidyl-prolyl cis-trans isomerase OS=Gossypium hirsutum OX=3635 GN=LOC107897163	LOC107897163	27.62	-2	25.9	6	15	1	0.932	1.049	0.929	1	0.97	1.162	1.134	0.055484
A0A1U8IIP1	cell wall / vacuolar inhibitor of fructosidase 1-like OS=Gossypium hirsutum OX=3635 GN=LOC107895483	LOC107895483	19.3	21.682	46.4	7	16	2	1.054	0.92	1.018	1.097	0.927	0.996	1.005	0.9586
A0A1U8IIQ4	CCR4-NOT transcription complex subunit 11-like OS=Gossypium hirsutum OX=3635 GN=LOC107897174	LOC107897174	49.256	30.199	26.8	8	10	1
A0A1U8IIR6	ABC transporter B family member 11-like OS=Gossypium hirsutum OX=3635 GN=LOC107897158	LOC107897158	139.26	26.801	15.7	15	23	2	0.437	1.613	0.439	1.524	0.44	1.79	3.744	0.00127876
A0A1U8IIW4	probable alkaline/neutral invertase D OS=Gossypium hirsutum OX=3635 GN=LOC107895101	LOC107895101	63.432	110.37	32.3	16	33	4	0.998	0.999	0.965	1.084	0.891	1.083	1.109	0.07336
A0A1U8IIW6	mitochondrial arginine transporter BAC2-like isoform X2 OS=Gossypium hirsutum OX=3635 GN=LOC107897201	LOC107897201	30.954	4.3973	3.8	1	1	1	1.189	0.897	1.115	0.803	1.095	0.867	0.755	0.0024035
A0A1U8IIX3	pyridoxal 5'-phosphate synthase-like subunit PDX1.2 OS=Gossypium hirsutum OX=3635 GN=LOC107897202	LOC107897202	32.949	56.393	30.5	7	13	2
A0A1U8IIX9	FAM10 family protein At4g22670-like OS=Gossypium hirsutum OX=3635 GN=LOC107895113	LOC107895113	41.797	64.579	43.2	18	47	4	1.183	0.789	1.2	0.86	1.141	0.713	0.67	0.0020039
A0A1U8IIY5	N-alpha-acetyltransferase 16, NatA auxiliary subunit-like OS=Gossypium hirsutum OX=3635 GN=LOC107897232	LOC107897232	101.9	7.9522	32.1	27	40	2	0.999	0.908	1.054	0.967	1.007	1.073	0.963	0.4867
A0A1U8IIZ3	Sulfurtransferase OS=Gossypium hirsutum OX=3635 GN=LOC107895128	LOC107895128	41.888	91.153	43.5	13	21	3	1.064	0.952	1.036	0.961	1.057	0.921	0.898	0.0020608
A0A1U8IIZ4	Coatomer subunit beta' OS=Gossypium hirsutum OX=3635 GN=LOC107897242	LOC107897242	102.77	11.127	20.3	17	32	2	0.916	1.079	0.93	1.041	0.856	1.29	1.262	0.03224
A0A1U8IIZ6	ADP,ATP carrier protein OS=Gossypium hirsutum OX=3635 GN=LOC107897222	LOC107897222	66.997	7.9268	14.5	9	15	1	0.973	1.069	1.045	0.95	0.973	1.002	1.01	0.83258
A0A1U8IJ11	probable prolyl 4-hydroxylase 10 OS=Gossypium hirsutum OX=3635 GN=LOC107895600	LOC107895600	32.626	56.24	32.2	7	7	2	0.852	1.168	0.815	1.015	0.871	1.363	1.397	0.0199415
A0A1U8IJ44	cytochrome c oxidase assembly protein COX11, mitochondrial-like isoform X2 OS=Gossypium hirsutum OX=3635 GN=LOC107897290	LOC107897290	26.14	3.6624	10	2	2	2
A0A1U8IJ50	Phospholipase D OS=Gossypium hirsutum OX=3635 GN=LOC107897264	LOC107897264	91.539	63.475	54.4	43	143	4	1.016	1.03	0.926	1.082	0.902	1.086	1.124	0.041402
A0A1U8IJ73	methyl-CpG-binding domain-containing protein 11-like isoform X1 OS=Gossypium hirsutum OX=3635 GN=LOC107897271	LOC107897271	35.575	69.41	80.3	24	51	10	0.94	0.903	1.197	0.955	1.109	0.902	0.85	0.099615
A0A1U8IJ78	Signal recognition particle 54 kDa protein OS=Gossypium hirsutum OX=3635 GN=LOC107897277	LOC107897277	55.196	46.926	28.6	13	18	13	1.017	1.025	0.982	1.041	0.898	1.023	1.066	0.22246
A0A1U8IJ90	omega-hydroxypalmitate O-feruloyl transferase-like isoform X2 OS=Gossypium hirsutum OX=3635 GN=LOC107897316	LOC107897316	47.842	5.4085	9.3	4	4	3
A0A1U8IJA6	exocyst complex component SEC6 isoform X1 OS=Gossypium hirsutum OX=3635 GN=LOC107897327	LOC107897327	86.519	10.42	5.8	4	4	4	0.743	1.155	0.85	1.285	0.754	1.311	1.598	0.00126359
A0A1U8IJA8	translocon-associated protein subunit beta-like OS=Gossypium hirsutum OX=3635 GN=LOC107897297	LOC107897297	21.287	45.548	26.7	3	4	2	1.015	1.014	0.962	1.038	0.978	1.015	1.038	0.100842
A0A1U8IJD6	Protein ROOT HAIR DEFECTIVE 3 homolog OS=Gossypium hirsutum OX=3635 GN=LOC107895747	LOC107895747	93.134	50.736	12.5	10	12	6	1.009	1.002	0.919	1.001	1.019	1.036	1.031	0.414
A0A1U8IJE1	UPF0434 protein Mmwyl1_2153-like OS=Gossypium hirsutum OX=3635 GN=LOC107895752	LOC107895752	9.3657	4.7308	27.6	2	3	2	1.089	1.049	1.019	1.003	0.947	0.897	0.965	0.59198
A0A1U8IJF0	GDSL esterase/lipase APG-like OS=Gossypium hirsutum OX=3635 GN=LOC107897359	LOC107897359	38.607	27.058	22.8	7	15	2	1.478	0.565	1.3	0.543	1.412	0.564	0.399	2.0414e-05
A0A1U8IJF4	IAA-amino acid hydrolase ILR1-like 4 isoform X1 OS=Gossypium hirsutum OX=3635 GN=LOC107897363	LOC107897363	49.045	84.838	28.7	11	19	9	0.572	1.524	0.539	1.233	0.563	1.758	2.697	0.00071813
A0A1U8IJF9	vesicle transport v-SNARE 13 OS=Gossypium hirsutum OX=3635 GN=LOC107897369	LOC107897369	24.914	3.6523	46.2	9	11	2	1.086	0.934	1.077	0.881	1.103	0.898	0.831	0.00056025
A0A1U8IJG8	probable mitochondrial saccharopine dehydrogenase-like oxidoreductase At5g39410 OS=Gossypium hirsutum OX=3635 GN=LOC107897376	LOC107897376	54.832	44.945	14.8	7	10	3	1.062	0.921	1.057	0.913	1.115	0.98	0.87	0.0076996
A0A1U8IJJ0	protein FLX-like 3 OS=Gossypium hirsutum OX=3635 GN=LOC107897388	LOC107897388	31.348	2.1887	9	3	3	2	1.02	1.006	1.06	0.952	0.991	0.975	0.955	0.14302
A0A1U8IJJ2	beta-glucuronosyltransferase GlcAT14A-like OS=Gossypium hirsutum OX=3635 GN=LOC107895271	LOC107895271	47.777	0.98026	4.3	2	2	2
A0A1U8IJJ3	probable protein Pop3 OS=Gossypium hirsutum OX=3635 GN=LOC107897339	LOC107897339	12.477	11.723	31.2	3	11	3	0.926	1.144	0.988	1.042	1.077	0.838	1.011	0.96644
A0A1U8IJJ7	casein kinase I homolog 1-like OS=Gossypium hirsutum OX=3635 GN=LOC107897345	LOC107897345	68.22	1.5707	2.8	2	2	2	1.063	0.92	1.032	0.957	1.077	0.945	0.89	0.0024241
A0A1U8IJJ8	plant intracellular Ras-group-related LRR protein 6-like OS=Gossypium hirsutum OX=3635 GN=LOC107895277	LOC107895277	63.768	4.1774	17.3	11	15	1	1.056	0.915	0.977	1.001	1.064	0.993	0.939	0.188362
A0A1U8IJK5	nuclear pore complex protein NUP96-like OS=Gossypium hirsutum OX=3635 GN=LOC107897340	LOC107897340	149.83	19.057	7.4	6	7	6	0.951	1.123	1	0.985	0.867	1.113	1.143	0.087897
A0A1U8IJM0	beta-fructofuranosidase, insoluble isoenzyme CWINV1-like OS=Gossypium hirsutum OX=3635 GN=LOC107897406	LOC107897406	63.929	2.1756	10.5	6	11	1	1.231	0.828	1.303	0.739	1.022	0.814	0.67	0.0081849
A0A1U8IJM5	DNA repair protein RadA-like isoform X2 OS=Gossypium hirsutum OX=3635 GN=LOC107897358	LOC107897358	66.393	2.6059	2.1	1	2	1
A0A1U8IJN4	25.3 kDa vesicle transport protein-like OS=Gossypium hirsutum OX=3635 GN=LOC107897421	LOC107897421	25.283	-2	44.5	10	14	1	1.033	0.929	1.039	1.006	1	0.997	0.954	0.16586
A0A1U8IJN7	Integrase, catalytic core OS=Corchorus capsularis OX=210143 GN=CCACVL1_17485 PE=4 SV=1	LOC107895880	50.569	0.97834	4	2	3	2	1.125	1.036	1.02	0.892	1.022	0.9	0.893	0.120736
A0A1U8IJQ7	BUD13 homolog OS=Gossypium hirsutum OX=3635 GN=LOC107897382	LOC107897382	67.498	4.2102	4.4	3	3	3
A0A1U8IJS2	protein HOTHEAD-like OS=Gossypium hirsutum OX=3635 GN=LOC107897399	LOC107897399	65.231	18.401	11.5	5	7	2	1.247	0.686	1.241	0.642	1.414	0.667	0.511	0.000139651
A0A1U8IJT6	phosphoenolpyruvate carboxylase-like OS=Gossypium hirsutum OX=3635 GN=LOC107895337	LOC107895337	110.93	49.425	33.4	34	65	5	1.077	0.905	1.091	0.918	1.115	0.9	0.829	9.5014e-05
A0A1U8IJT7	Beta-galactosidase OS=Gossypium hirsutum OX=3635 GN=LOC107897410	LOC107897410	93.791	1.0642	9.8	7	10	1	1.043	1.278	0.821	0.907	0.716	1.319	1.358	0.134461
A0A1U8IJU1	NADH dehydrogenase [ubiquinone] iron-sulfur protein 7, mitochondrial-like OS=Gossypium hirsutum OX=3635 GN=LOC107895342	LOC107895342	22.948	1.1428	23.9	6	9	1
A0A1U8IJV1	bromodomain-containing protein 4-like OS=Gossypium hirsutum OX=3635 GN=LOC107897427	LOC107897427	62.416	1.7097	1.6	1	1	1
A0A1U8IJV7	Nascent polypeptide-associated complex subunit beta OS=Gossypium hirsutum OX=3635 GN=LOC107897443	LOC107897443	17.863	5.6916	25.9	5	14	1	1.04	1.194	1.103	1.067	0.86	0.737	0.998	0.92478
A0A1U8IJW8	LMBR1 domain-containing protein 2 homolog A-like OS=Gossypium hirsutum OX=3635 GN=LOC107897469	LOC107897469	83.213	7.5488	2.6	2	2	2	1.092	1.158	1.014	0.742	0.985	1.018	0.944	0.61668
A0A1U8IJY6	cytochrome P450 71D10-like OS=Gossypium hirsutum OX=3635 GN=LOC107897460	LOC107897460	57.827	31.002	11.4	5	7	1	0.887	1.137	0.852	1.174	0.989	1.008	1.217	0.038144
A0A1U8IJZ3	zinc phosphodiesterase ELAC protein 2-like OS=Gossypium hirsutum OX=3635 GN=LOC107897490	LOC107897490	104.15	1.1131	0.9	1	1	1	1.02	0.916	1.171	0.956	1.07	0.838	0.831	0.029981
A0A1U8IJZ6	protein STRUBBELIG-RECEPTOR FAMILY 6-like OS=Gossypium hirsutum OX=3635 GN=LOC107897471	LOC107897471	78.194	109.38	19.8	11	13	9	0.92	1.023	0.976	1.003	0.983	1.096	1.084	0.07702
A0A1U8IK15	Plasma membrane ATPase OS=Gossypium hirsutum OX=3635 GN=LOC107897472	LOC107897472	104.98	30.422	39.9	35	87	3	1.333	0.619	1.145	0.77	1.237	0.796	0.588	0.004062
A0A1U8IK39	asparagine--tRNA ligase, chloroplastic/mitochondrial-like OS=Gossypium hirsutum OX=3635 GN=LOC107895466	LOC107895466	63.563	4.4666	8.1	5	5	1
A0A1U8IK76	WD repeat-containing protein 82-like isoform X2 OS=Gossypium hirsutum OX=3635 GN=LOC107897564	LOC107897564	37.149	7.85	9.8	2	2	2
A0A1U8IK83	Isocitrate dehydrogenase [NADP] OS=Gossypium hirsutum OX=3635 GN=LOC107897570	LOC107897570	54.841	2.2221	52.4	23	36	2	1.039	0.963	0.979	0.975	1.019	1.037	0.98	0.50954
A0A1U8IK86	probable Xaa-Pro aminopeptidase P isoform X4 OS=Gossypium hirsutum OX=3635 GN=LOC107897525	LOC107897525	71.839	48.957	30.5	16	37	2	1.073	0.955	1.024	0.978	1.021	0.981	0.935	0.020678
A0A1U8IKB5	chaperonin 60 subunit beta 2, chloroplastic-like isoform X1 OS=Gossypium hirsutum OX=3635 GN=LOC107896231	LOC107896231	64.369	323.31	55.5	34	105	2	0.901	1.141	1.048	1.088	0.931	0.962	1.108	0.21026
A0A1U8IKB8	Peptide deformylase OS=Gossypium hirsutum OX=3635 GN=LOC107897571	LOC107897571	29.115	9.1659	12.9	3	3	3	0.945	0.993	1.089	1.041	0.999	0.934	0.979	0.70702
A0A1U8IKD4	serine/threonine-protein kinase BLUS1-like OS=Gossypium hirsutum OX=3635 GN=LOC107897574	LOC107897574	75.499	4.2382	12.5	6	7	1	1.075	0.847	0.984	0.894	1.099	1.104	0.901	0.27796
A0A1U8IKE1	spindle pole body component 110-like OS=Gossypium hirsutum OX=3635 GN=LOC107936514 PE=4 SV=1	LOC107895581	25.129	-2	3.3	1	1	1	0.942	1.186	0.868	1.022	1.028	0.992	1.128	0.180918
A0A1U8IKG8	Thioredoxin OS=Gossypium hirsutum OX=3635 GN=LOC107897616	LOC107897616	13.441	15.686	38	6	11	4	1.002	0.957	1.036	0.963	1.096	0.898	0.899	0.036777
A0A1U8IKH3	Mitogen-activated protein kinase OS=Gossypium hirsutum OX=3635 GN=LOC107897619	LOC107897619	42.309	8.1281	9.5	3	3	1
A0A1U8IKH4	programmed cell death protein 2-like OS=Gossypium hirsutum OX=3635 GN=LOC107897635	LOC107897635	42.604	3.5293	9.1	3	3	3	0.957	1.088	0.917	0.994	0.981	1.099	1.114	0.045683
A0A1U8IKI5	D-2-hydroxyglutarate dehydrogenase, mitochondrial-like OS=Gossypium hirsutum OX=3635 GN=LOC107897617	LOC107897617	59.811	48.825	12.4	5	7	5	0.938	1.047	0.899	1.086	0.928	1.124	1.178	0.0024782
A0A1U8IKN9	pyruvate, phosphate dikinase 2-like OS=Gossypium hirsutum OX=3635 GN=LOC107897656	LOC107897656	107.3	1.1948	0.7	1	7	1	0.569	1.602	0.573	1.323	0.665	1.403	2.395	0.00032473
A0A1U8IKP7	Myosin-H heavy chain isoform 1 OS=Theobroma cacao OX=3641 GN=TCM_001230 PE=4 SV=1	LOC107897660	40.923	70.719	34.7	10	21	10	0.992	1.09	0.958	1.082	0.953	0.943	1.073	0.233
A0A1U8IKT3	Pyruvate kinase OS=Gossypium hirsutum OX=3635 GN=LOC107897689	LOC107897689	63.338	3.0257	21.4	10	18	1
A0A1U8IKT6	cell division protein FtsZ homolog 2-1, chloroplastic-like isoform X1 OS=Gossypium hirsutum OX=3635 GN=LOC107896355	LOC107896355	51.018	4.631	19.5	6	8	1	0.971	0.947	0.863	1.126	0.959	1.182	1.165	0.1231
A0A1U8IKV5	mitogen-activated protein kinase kinase 2-like isoform X1 OS=Gossypium hirsutum OX=3635 GN=LOC107897718	LOC107897718	39.764	16.515	21.9	8	11	4	1.077	0.888	1.024	0.909	1.103	0.991	0.87	0.0249
A0A1U8IKW4	nucleosome assembly protein 12-like OS=Gossypium hirsutum OX=3635 GN=LOC107897728	LOC107897728	42.186	17.288	13.2	4	5	1	0.918	1.111	0.954	0.932	0.889	1.248	1.192	0.125079
A0A1U8IKY5	U-box domain-containing protein 34-like isoform X4 OS=Gossypium hirsutum OX=3635 GN=LOC107897722	LOC107897722	74.649	2.0045	1.7	1	1	1	1.314	0.563	1.278	0.656	1.396	0.681	0.476	0.00030428
A0A1U8IKY8	3-ketoacyl-CoA thiolase 2, peroxisomal-like OS=Gossypium hirsutum OX=3635 GN=LOC107897747	LOC107897747	48.848	35.414	50.4	18	59	3	1.014	1.017	1.036	0.983	1.027	0.94	0.955	0.123335
A0A1U8IL00	Eukaryotic translation initiation factor 3 subunit L OS=Gossypium hirsutum OX=3635 GN=LOC107896412	LOC107896412	61.354	101.06	26.5	13	20	3	1.084	1.053	0.951	0.965	0.962	1.003	1.008	0.86118
A0A1U8IL21	stem-specific protein TSJT1-like OS=Gossypium hirsutum OX=3635 GN=LOC107897761	LOC107897761	27.066	6.686	31.5	9	18	2	0.947	0.967	1.05	1.133	0.957	0.964	1.037	0.60842
A0A1U8IL32	splicing factor 3B subunit 3-like OS=Gossypium hirsutum OX=3635 GN=LOC107897773	LOC107897773	134.5	117.6	18.9	21	32	1	1.064	0.894	0.978	0.94	1.038	1.096	0.951	0.46724
A0A1U8IL36	glutathione S-transferase DHAR2-like OS=Gossypium hirsutum OX=3635 GN=LOC107897777	LOC107897777	23.507	25.365	61.8	13	27	5	0.922	1.001	1.02	1.052	1.054	0.966	1.008	0.86384
A0A1U8IL40	3-ketoacyl-CoA synthase OS=Gossypium hirsutum OX=3635 GN=LOC107897791	LOC107897791	51.838	11.501	5.3	2	2	2
A0A1U8IL46	probable prefoldin subunit 2 OS=Gossypium hirsutum OX=3635 GN=LOC107897772	LOC107897772	16.414	32.131	38.4	6	12	6	0.93	1.01	1	1.08	1.029	0.934	1.022	0.70682
A0A1U8IL72	60S ribosomal protein L23a OS=Gossypium hirsutum OX=3635 GN=LOC107897793	LOC107897793	17.524	7.576	33.8	7	16	4	0.998	1.024	0.963	1.102	0.902	1.042	1.107	0.051484
A0A1U8IL96	nudix hydrolase 14, chloroplastic-like OS=Gossypium hirsutum OX=3635 GN=LOC107896491	LOC107896491	34.856	5.8872	9.4	3	3	3
A0A1U8ILB6	UDP-glucuronic acid decarboxylase 6-like OS=Gossypium hirsutum OX=3635 GN=LOC107897825	LOC107897825	38.731	120.56	45.5	17	35	2	0.931	1.096	0.816	1.067	0.929	1.209	1.26	0.016056
A0A1U8ILC1	transaldolase-like OS=Gossypium hirsutum OX=3635 GN=LOC107896514	LOC107896514	43.096	21.767	34.2	14	20	1	1.209	0.903	1.166	0.745	1.181	0.736	0.67	0.026444
A0A1U8ILE3	plasminogen activator inhibitor 1 RNA-binding protein-like isoform X1 OS=Gossypium hirsutum OX=3635 GN=LOC107896527	LOC107896527	38.625	110.97	38.1	12	40	2	0.945	1.03	1.02	1.037	1.045	0.969	1.009	0.81976
A0A1U8ILE6	heterogeneous nuclear ribonucleoprotein 1-like isoform X2 OS=Gossypium hirsutum OX=3635 GN=LOC107897845	LOC107897845	39.67	39.149	16.9	5	7	4	1.064	0.922	1.121	0.933	1.039	0.91	0.858	0.0028962
A0A1U8ILE7	kinesin-like protein KIF22 OS=Gossypium hirsutum OX=3635 GN=LOC107897880	LOC107897880	94.838	-2	1.4	1	1	1	0.718	1.296	0.726	1.42	0.694	1.271	1.865	7.5735e-05
A0A1U8ILF1	serine/threonine protein phosphatase 2A regulatory subunit B''beta-like isoform X2 OS=Gossypium hirsutum OX=3635 GN=LOC107897886	LOC107897886	61.972	12.482	12.7	6	9	5	1.089	0.809	1.052	0.96	1.072	1.007	0.864	0.154603
A0A1U8ILG3	tobamovirus multiplication protein 2A-like OS=Gossypium hirsutum OX=3635 GN=LOC107896541	LOC107896541	30.982	16.549	22.7	5	7	2	1.339	0.604	1.31	0.698	1.285	0.655	0.497	8.37e-05
A0A1U8ILI1	glycosylphosphatidylinositol anchor attachment 1 protein-like OS=Gossypium hirsutum OX=3635 GN=LOC107897912	LOC107897912	79.135	81.764	10.2	6	7	6	1.022	1.022	0.982	1.036	1.057	0.952	0.983	0.64044
A0A1U8ILJ0	Sucraseferredoxin-like protein OS=Corchorus capsularis OX=210143 GN=CCACVL1_24943 PE=4 SV=1	LOC107897909	44.008	-2	30.6	13	39	1	0.845	1.075	0.913	1.149	0.913	1.161	1.267	0.0025629
A0A1U8ILL0	Plasma membrane fusion PRM1 OS=Gossypium arboreum OX=29729 GN=F383_14893 PE=4 SV=1	LOC107897926	62.04	5.1423	5.6	3	3	3	0.536	1.355	0.659	1.287	0.504	1.854	2.646	0.0023035
A0A1U8ILL5	Superoxide dismutase OS=Gossypium hirsutum OX=3635 GN=LOC107897935	LOC107897935	25.955	-2	31.2	7	22	0
A0A1U8ILM0	40S ribosomal protein S26 OS=Gossypium hirsutum OX=3635 GN=LOC107897937	LOC107897937	14.788	41.637	43	7	20	1
A0A1U8ILM1	ATP-citrate synthase beta chain protein 2 OS=Gossypium hirsutum OX=3635 GN=LOC107896593	LOC107896593	65.951	81.071	45.7	24	75	3	1.24	0.738	1.175	0.767	1.202	0.718	0.615	3.9533e-05
A0A1U8ILQ0	acetate/butyrate--CoA ligase AAE7, peroxisomal-like OS=Gossypium hirsutum OX=3635 GN=LOC107896613	LOC107896613	62.133	117.69	37.1	17	44	11	0.707	1.401	0.716	1.304	0.666	1.321	1.927	3.5493e-05
A0A1U8ILS1	soluble inorganic pyrophosphatase 6, chloroplastic-like OS=Gossypium hirsutum OX=3635 GN=LOC107898001	LOC107898001	21.979	1.8167	35.9	7	13	1	1.07	0.879	1.033	1.062	1.157	0.774	0.833	0.123563
A0A1U8ILS8	major allergen Pru ar 1-like OS=Gossypium hirsutum OX=3635 GN=LOC107896642	LOC107896642	17.709	6.5386	14.5	2	2	2
A0A1U8ILU7	Ribosomal protein L19 OS=Gossypium hirsutum OX=3635 GN=LOC107896649	LOC107896649	24.121	4.3672	22.3	4	6	1
A0A1U8ILX8	probable ribose-5-phosphate isomerase 3, chloroplastic OS=Gossypium hirsutum OX=3635 GN=LOC107898141	LOC107898141	20.698	4.8216	14.4	3	5	1	1.027	0.941	1.044	0.989	1.09	0.941	0.908	0.0166835
A0A1U8ILZ5	Hexosyltransferase OS=Gossypium hirsutum OX=3635 GN=LOC107898096	LOC107898096	61.403	17.576	6.8	3	3	3	0.855	1.148	0.931	1.109	0.877	1.18	1.291	0.00117936
A0A1U8IM22	F-box protein At5g03970-like OS=Gossypium hirsutum OX=3635 GN=LOC107896261	LOC107896261	41.159	1.6429	2.5	1	1	1
A0A1U8IM29	H/ACA ribonucleoprotein complex subunit OS=Gossypium hirsutum OX=3635 GN=LOC107898138	LOC107898138	19.094	7.1014	20.4	3	4	1	1.002	1.082	0.942	1.042	0.924	1.041	1.104	0.022918
A0A1U8IM38	sucrose nonfermenting 4-like protein isoform X1 OS=Gossypium hirsutum OX=3635 GN=LOC107896709	LOC107896709	54.025	18.723	11.9	5	5	3
A0A1U8IM51	ribosome biogenesis protein BMS1 homolog isoform X4 OS=Gossypium hirsutum OX=3635 GN=LOC107896284	LOC107896284	132.61	1.1741	0.7	1	1	1	1.205	0.948	0.934	0.975	1.084	0.844	0.859	0.158398
A0A1U8IM81	NADH dehydrogenase [ubiquinone] 1 alpha subcomplex assembly factor 3-like isoform X1 OS=Gossypium hirsutum OX=3635 GN=LOC107896300	LOC107896300	19.278	37.913	25.4	5	7	5	0.921	1.075	1.07	1.01	1.07	0.917	0.981	0.79266
A0A1U8IM99	2-Cys peroxiredoxin BAS1, chloroplastic-like OS=Gossypium hirsutum OX=3635 GN=LOC107898212	LOC107898212	29.386	3.0403	14	5	14	2	1.028	0.869	1.157	0.946	1.129	0.818	0.795	0.0141802
A0A1U8IMB3	zinc finger protein ZPR1-like OS=Gossypium hirsutum OX=3635 GN=LOC107896767	LOC107896767	54.841	37.302	15.2	6	8	6	0.928	1.087	0.986	1.052	0.953	0.992	1.092	0.051876
A0A1U8IMB9	sorting nexin 1-like OS=Gossypium hirsutum OX=3635 GN=LOC107896333	LOC107896333	45.822	97.291	39.5	15	22	4	0.98	0.934	1.022	1.047	1.007	1.021	0.998	0.93142
A0A1U8IMC1	U5 small nuclear ribonucleoprotein 40 kDa protein OS=Gossypium hirsutum OX=3635 GN=LOC107896773	LOC107896773	37.973	63.029	33	12	19	12	1.007	0.951	1.1	0.985	1.022	0.894	0.904	0.063098
A0A1U8IMG3	glucose-6-phosphate/phosphate translocator 1, chloroplastic-like isoform X2 OS=Gossypium hirsutum OX=3635 GN=LOC107898222	LOC107898222	37.155	2.9506	8.3	3	4	1
A0A1U8IMK6	U-box domain-containing 4-like protein OS=Gossypium arboreum OX=29729 GN=F383_12692 PE=4 SV=1	LOC107898377	232.03	173.53	15.2	26	33	3	0.946	0.932	1.055	0.939	1.014	1.127	0.994	0.90814
A0A1U8IMK8	Formation of crista junctions 1 OS=Gossypium arboreum OX=29729 GN=F383_23410 PE=3 SV=1	LOC107898358	74.517	51.721	20.5	11	13	5	1.002	0.945	0.943	1.013	0.98	1.147	1.062	0.39292
A0A1U8IML7	patellin-3-like OS=Gossypium hirsutum OX=3635 GN=LOC107896868	LOC107896868	63.959	3.9365	13	7	13	3
A0A1U8IMQ3	electron transfer flavoprotein-ubiquinone oxidoreductase, mitochondrial-like OS=Gossypium hirsutum OX=3635 GN=LOC107896902	LOC107896902	70.802	15.463	12.9	7	8	7	1.156	0.886	1.095	0.887	1.102	0.84	0.779	0.00055526
A0A1U8IMR6	HVA22-like protein OS=Gossypium hirsutum OX=3635 GN=LOC107898438	LOC107898438	26.544	1.9458	5.8	1	1	1	1.352	1.05	1.148	0.788	0.999	0.609	0.699	0.105837
A0A1U8IMR7	enoyl-[acyl-carrier-protein] reductase [NADH], chloroplastic-like OS=Gossypium hirsutum OX=3635 GN=LOC107898485	LOC107898485	41.741	94.816	26.9	8	25	3	1.027	1.002	1.045	0.979	1.061	0.918	0.925	0.048276
A0A1U8IMU4	ABC transporter D family member 1 OS=Gossypium hirsutum OX=3635 GN=LOC107898484	LOC107898484	132.84	1.0118	7.9	8	8	1	1.026	0.857	1.113	0.855	1.121	1.009	0.835	0.041397
A0A1U8IMU5	60S ribosomal protein L4-like OS=Gossypium hirsutum OX=3635 GN=LOC107898498	LOC107898498	44.71	64.653	50.4	19	42	3	0.923	0.998	0.962	1.029	0.934	1.119	1.116	0.040304
A0A1U8IMV9	soluble inorganic pyrophosphatase 6, chloroplastic-like OS=Gossypium hirsutum OX=3635 GN=LOC107898516	LOC107898516	32.918	0.96583	30.2	10	19	0
A0A1U8IMX1	prolyl 4-hydroxylase 1-like OS=Gossypium hirsutum OX=3635 GN=LOC107896948	LOC107896948	32.082	1.2451	3.1	1	1	1
A0A1U8IMY0	ras-related protein RABH1e OS=Gossypium hirsutum OX=3635 GN=LOC107898520	LOC107898520	23.18	16.942	56.2	11	23	4	0.924	1.112	0.931	0.973	0.965	1.109	1.133	0.056019
A0A1U8IMY5	basic blue protein-like OS=Gossypium hirsutum OX=3635 GN=LOC107898524	LOC107898524	13.281	4.5181	7.9	1	4	1	1.157	0.613	1.13	0.668	1.375	0.813	0.572	0.0056634
A0A1U8IN13	isocitrate dehydrogenase [NAD] regulatory subunit 1, mitochondrial-like OS=Gossypium hirsutum OX=3635 GN=LOC107898537	LOC107898537	39.763	42.74	31.5	10	20	2	0.84	1.102	0.912	1.114	0.918	1.117	1.248	0.0164025
A0A1U8IN15	WD repeat-containing protein LWD1-like OS=Gossypium hirsutum OX=3635 GN=LOC107896977	LOC107896977	39.056	67.34	24	6	7	3	0.991	0.998	1.002	1.028	1.013	1.014	1.011	0.35172
A0A1U8IN52	pentatricopeptide repeat-containing protein At1g79490, mitochondrial-like OS=Gossypium hirsutum OX=3635 GN=LOC107896550	LOC107896550	92.455	0.98287	1.3	1	1	1	1.503	0.39	1.473	0.529	1.459	0.471	0.313	0.005795
A0A1U8IN59	ubiquitin fusion degradation protein 1 homolog OS=Gossypium hirsutum OX=3635 GN=LOC107898576	LOC107898576	35.709	48.115	39.6	11	15	5	0.863	1.072	0.887	1.147	0.956	1.145	1.243	0.0044847
A0A1U8IN61	probable serine protease EDA2 OS=Gossypium hirsutum OX=3635 GN=LOC107896563	LOC107896563	54.898	127.91	32.5	13	33	4	0.798	1.308	0.782	1.207	0.756	1.228	1.602	8.2439e-05
A0A1U8IN64	triosephosphate isomerase, chloroplastic-like OS=Gossypium hirsutum OX=3635 GN=LOC107898584	LOC107898584	33.085	152.84	47.6	14	41	1	0.961	0.999	1.048	1.04	1.129	0.812	0.909	0.32956
A0A1U8IN67	60S ribosomal protein L10-like OS=Gossypium hirsutum OX=3635 GN=LOC107896565	LOC107896565	25.042	3.3785	33.2	7	18	1	0.917	1.064	0.906	1.086	0.946	1.11	1.177	0.0007779
A0A1U8IN68	retinoblastoma-related protein-like OS=Gossypium hirsutum OX=3635 GN=LOC107897018	LOC107897018	112.6	25.642	5.7	6	6	6	1.106	0.941	1.091	0.902	1.022	0.922	0.859	0.0051226
A0A1U8IN70	translocon-associated protein subunit alpha-like OS=Gossypium hirsutum OX=3635 GN=LOC107898585	LOC107898585	27.659	9.8099	14.9	3	4	2	0.738	1.034	0.933	1.116	0.913	1.336	1.349	0.048578
A0A1U8IN71	Annexin OS=Gossypium hirsutum OX=3635 GN=LOC107898581	LOC107898581	36.014	231.93	75.6	29	105	27	0.9	1.041	0.904	1.045	1.016	1.133	1.141	0.051163
A0A1U8IN75	SWI/SNF complex subunit SWI3D-like isoform X1 OS=Gossypium hirsutum OX=3635 GN=LOC107898593	LOC107898593	110.22	6.5663	4.2	4	4	4	1.318	0.8	1.215	0.629	1.107	0.869	0.631	0.0129432
A0A1U8IN76	eukaryotic translation initiation factor 4B3-like OS=Gossypium hirsutum OX=3635 GN=LOC107898589	LOC107898589	40.394	20.392	27.3	8	9	1	1.112	0.842	1.074	0.976	1.097	0.876	0.821	0.0116191
A0A1U8IN77	trans-cinnamate 4-monooxygenase-like OS=Gossypium hirsutum OX=3635 GN=LOC107896573	LOC107896573	58.251	151.88	51.5	25	57	3	1.2	0.881	1.159	0.679	1.175	0.904	0.697	0.056977
A0A1U8INB3	Capsid OS=Gossypium arboreum OX=29729 GN=F383_17784 PE=4 SV=1	LOC107896599	92.153	106.03	24.8	17	24	3	0.91	1.084	0.922	1.099	0.922	1.138	1.206	0.00024256
A0A1U8INC2	major pollen allergen Bet v 1-A-like OS=Gossypium hirsutum OX=3635 GN=LOC107896609	LOC107896609	17.395	104.39	56	8	44	3	0.6	1.274	0.681	1.364	0.677	1.413	2.069	0.000141386
A0A1U8INC3	Urease OS=Gossypium hirsutum OX=3635 GN=LOC107898633	LOC107898633	90.102	20.885	18.9	12	15	1	0.981	1.032	0.949	0.956	0.935	1.186	1.108	0.20204
A0A1U8IND6	Serine/threonine protein phosphatase 2A regulatory subunit OS=Gossypium hirsutum OX=3635 GN=LOC107898641	LOC107898641	59.929	2.4358	6	4	6	1
A0A1U8INE1	cleavage and polyadenylation specificity factor subunit 6-like OS=Gossypium hirsutum OX=3635 GN=LOC107898647	LOC107898647	69.146	74.664	16.8	7	10	7	1.089	0.953	1.101	0.919	1.02	0.869	0.854	0.0116617
A0A1U8INE5	protein GLE1-like OS=Gossypium hirsutum OX=3635 GN=LOC107898649	LOC107898649	72.749	4.3109	6.2	3	3	3	1.148	0.794	1.129	0.803	1.122	0.97	0.755	0.048697
A0A1U8INF0	non-functional NADPH-dependent codeinone reductase 2-like OS=Gossypium hirsutum OX=3635 GN=LOC107898653	LOC107898653	36.938	10.083	19.5	6	7	4	1.15	0.967	1.083	0.969	0.954	0.863	0.878	0.128399
A0A1U8INF6	anthranilate phosphoribosyltransferase-like isoform X3 OS=Gossypium hirsutum OX=3635 GN=LOC107898657	LOC107898657	65.001	1.4096	22.8	11	16	1
A0A1U8ING2	ribose-phosphate pyrophosphokinase 4-like isoform X1 OS=Gossypium hirsutum OX=3635 GN=LOC107898659	LOC107898659	42.878	18.647	18.6	6	6	6	0.929	1.087	1.031	0.913	0.996	1.063	1.036	0.62152
A0A1U8ING9	protein OSB3, chloroplastic/mitochondrial-like OS=Gossypium hirsutum OX=3635 GN=LOC107898675	LOC107898675	37.176	21.578	19.7	6	9	6	0.972	1.06	0.987	1.065	1.05	0.909	1.008	0.91912
A0A1U8INH8	60S ribosomal protein L3-2 OS=Gossypium hirsutum OX=3635 GN=LOC107898684	LOC107898684	44.32	54.78	50.6	21	40	7	1.076	0.93	1.016	0.978	1.023	1.003	0.935	0.076805
A0A1U8INI8	At4g24330 OS=Arabidopsis thaliana OX=3702 GN=At4g24330 PE=2 SV=1	LOC107898688	53.1	3.6792	6.6	2	3	1	0.845	1.042	0.78	1.093	0.985	1.331	1.328	0.049543
A0A1U8INL8	Peroxidase OS=Gossypium hirsutum OX=3635 GN=LOC107896674	LOC107896674	36.914	6.123	15.6	5	14	1
A0A1U8INM3	probable histone-arginine methyltransferase 1.3 isoform X2 OS=Gossypium hirsutum OX=3635 GN=LOC107896681	LOC107896681	59.851	15.549	11.5	5	5	1
A0A1U8INM6	LOW QUALITY PROTEIN: cell division cycle and apoptosis regulator protein 1-like OS=Gossypium hirsutum OX=3635 GN=LOC107898725	LOC107898725	155.79	2.7157	13.7	18	18	1
A0A1U8INN2	endo-1,31,4-beta-D-glucanase-like isoform X1 OS=Gossypium hirsutum OX=3635 GN=LOC107896692	LOC107896692	25.634	3.3347	6.7	2	3	1	1.208	0.843	1.152	0.832	1.157	0.753	0.69	0.00065999
A0A1U8INP3	T-complex protein 1 subunit gamma OS=Gossypium hirsutum OX=3635 GN=LOC107897176	LOC107897176	60.335	230.34	53.1	31	66	3	1.211	0.902	1.038	0.774	1.176	0.853	0.738	0.0096014
A0A1U8INP5	UDP-glycosyltransferase 89A2-like OS=Gossypium hirsutum OX=3635 GN=LOC107898742	LOC107898742	50.347	13.403	14.8	6	8	5	1.007	1.036	0.983	0.933	1.022	0.961	0.973	0.43936
A0A1U8INP6	bifunctional epoxide hydrolase 2-like OS=Gossypium hirsutum OX=3635 GN=LOC107896704	LOC107896704	43.971	9.9552	24.6	10	20	2	1.242	0.813	1.213	0.849	1.128	0.686	0.655	0.0039233
A0A1U8INR1	Sorting nexin-13 OS=Gossypium arboreum OX=29729 GN=F383_22878 PE=4 SV=1	LOC107897196	124.05	4.1672	2.7	2	2	2
A0A1U8INS3	pentatricopeptide repeat-containing protein At4g32450, mitochondrial-like OS=Gossypium hirsutum OX=3635 GN=LOC107898759	LOC107898759	76.388	1.3607	3.2	2	2	2
A0A1U8INS4	phospholipase A-2-activating protein-like OS=Gossypium hirsutum OX=3635 GN=LOC107898757	LOC107898757	84.062	258.01	38.6	25	36	4	1.083	0.956	1.018	0.988	1.038	0.943	0.92	0.021863
A0A1U8INS6	monothiol glutaredoxin-S15, mitochondrial-like OS=Gossypium hirsutum OX=3635 GN=LOC107897207	LOC107897207	18.598	1.7462	59.4	10	15	1
A0A1U8INT5	Dolichyl-diphosphooligosaccharide--protein glycosyltransferase 48 kDa subunit OS=Gossypium hirsutum OX=3635 GN=LOC107898761	LOC107898761	48.537	96.469	22.7	10	18	3	0.969	1.035	1.005	0.953	0.985	1.097	1.043	0.3949
A0A1U8INT8	Myosin-H heavy chain OS=Gossypium arboreum OX=29729 GN=F383_18851 PE=4 SV=1	LOC107896722	113.91	0.95381	1	1	1	1
A0A1U8INU2	ATP-dependent Clp protease proteolytic subunit OS=Gossypium hirsutum OX=3635 GN=LOC107898767	LOC107898767	28.909	13.799	11.5	3	5	3	1.09	0.988	1.016	0.851	1.043	0.964	0.89	0.07976
A0A1U8INU6	leucine-rich repeat extensin-like protein 2 OS=Gossypium hirsutum OX=3635 GN=LOC107898768	LOC107898768	53.872	68.71	31	13	29	4	0.933	1.082	0.991	1.049	1.004	0.939	1.048	0.39712
A0A1U8INV4	Ras GTPase-like protein 1 OS=Gossypium hirsutum OX=3635 GN=LOC107898775	LOC107898775	24.846	42.158	51.1	11	22	4	1.079	1.004	0.984	0.99	0.944	0.988	0.992	0.88008
A0A1U8INW0	Chaperone dnaJ 49-like protein OS=Gossypium arboreum OX=29729 GN=F383_03553 PE=4 SV=1	LOC107898782	79.35	17.645	5.7	2	2	2	0.997	0.934	1.088	0.927	1.181	0.849	0.83	0.032621
A0A1U8INZ4	cell division cycle protein 48 homolog OS=Gossypium hirsutum OX=3635 GN=LOC107898806	LOC107898806	89.564	55.408	63.6	43	109	2	1.093	0.815	1.051	0.86	1.09	1.082	0.853	0.197302
A0A1U8INZ6	Acyl-[acyl-carrier-protein] desaturase OS=Gossypium hirsutum OX=3635 GN=LOC107896777	LOC107896777	41.851	6.9623	17.9	6	11	2	0.988	1.093	0.956	1.003	0.918	1.075	1.108	0.039004
A0A1U8INZ8	ethylene-insensitive protein 2-like isoform X2 OS=Gossypium hirsutum OX=3635 GN=LOC107898809	LOC107898809	139.32	7.3085	6.5	8	11	1	0.877	0.937	1.133	1.005	1.19	0.835	0.868	0.28004
A0A1U8IP17	3-isopropylmalate dehydrogenase OS=Gossypium hirsutum OX=3635 GN=LOC107897280	LOC107897280	43.543	38.391	29.7	11	17	11	0.985	1.039	1.007	1.049	0.979	0.993	1.037	0.129336
A0A1U8IP23	AT3g53630/F4P12_330 OS=Arabidopsis thaliana OX=3702 GN=At3g53630 PE=2 SV=1	LOC107898823	22.661	1.4234	6.5	1	1	1
A0A1U8IP36	aldo-keto reductase family 4 member C8-like OS=Gossypium hirsutum OX=3635 GN=LOC107898840	LOC107898840	35.343	-2	9.2	3	7	0
A0A1U8IP41	TIP41-like protein OS=Gossypium arboreum OX=29729 GN=F383_04290 PE=4 SV=1	LOC107898843	37.793	-2	3.2	1	1	1	1.043	0.936	1.006	1.048	1.113	0.846	0.895	0.171999
A0A1U8IP60	U3 small nucleolar RNA-associated protein 4-like isoform X2 OS=Gossypium hirsutum OX=3635 GN=LOC107896835	LOC107896835	84.001	2.1317	2.1	2	2	2
A0A1U8IP79	protein TRANSPARENT TESTA 16-like OS=Gossypium hirsutum OX=3635 GN=LOC107898867	LOC107898867	27.502	6.0522	12.9	3	4	3	1.069	0.912	1.102	0.837	1.018	1.019	0.868	0.078679
A0A1U8IP83	E3 ubiquitin-protein ligase RING1-like OS=Gossypium hirsutum OX=3635 GN=LOC107898872	LOC107898872	36.686	22.975	18.3	4	6	2	1.012	0.983	1.05	0.889	1.225	0.814	0.817	0.065416
A0A1U8IP94	Alpha-galactosidase OS=Gossypium hirsutum OX=3635 GN=LOC107898886	LOC107898886	44.574	66.488	30.5	11	14	2	0.9	1.131	0.855	1.167	0.796	1.276	1.401	0.0026609
A0A1U8IP95	protein SUPPRESSOR OF GENE SILENCING 3-like OS=Gossypium hirsutum OX=3635 GN=LOC107896873	LOC107896873	74.58	1.2041	30.7	19	20	1
A0A1U8IP97	Transcription elongation factor SPT4 homolog OS=Gossypium hirsutum OX=3635 GN=LOC107898885	LOC107898885	13.213	6.8077	26.7	2	3	2	1.041	0.913	1.127	0.992	1.04	0.868	0.864	0.035965
A0A1U8IPA3	3-isopropylmalate dehydratase small subunit 3-like OS=Gossypium hirsutum OX=3635 GN=LOC107898889	LOC107898889	27.401	71.282	34	8	15	8	0.959	1.056	0.983	1.043	1.012	0.964	1.037	0.33408
A0A1U8IPA4	AT-rich interactive domain-containing protein 6-like isoform X2 OS=Gossypium hirsutum OX=3635 GN=LOC107898893	LOC107898893	52.535	45.181	28.9	13	21	11	1.105	0.861	1.145	0.891	1.04	0.854	0.792	0.00167975
A0A1U8IPB2	brefeldin A-inhibited guanine nucleotide-exchange protein 1-like OS=Gossypium hirsutum OX=3635 GN=LOC107898897	LOC107898897	189.89	4.5957	3.7	6	6	4	0.937	0.938	1.066	0.945	0.955	1.18	1.035	0.73718
A0A1U8IPB6	aminoacylase-1-like OS=Gossypium hirsutum OX=3635 GN=LOC107898901	LOC107898901	50.644	32.604	15.2	8	13	8	1.02	0.945	1.067	0.981	1.123	0.837	0.861	0.05222
A0A1U8IPC1	monosaccharide-sensing protein 2-like OS=Gossypium hirsutum OX=3635 GN=LOC107898905	LOC107898905	79.016	3.0523	8.9	5	8	2
A0A1U8IPD2	BnaA06g23310D protein OS=Brassica napus OX=3708 GN=BnaA06g23310D PE=4 SV=1	LOC107898921	26.797	15.211	28.7	5	6	2	1.141	0.976	1.092	0.888	1.101	0.769	0.79	0.027075
A0A1U8IPD5	7,8-dihydroneopterin aldolase OS=Gossypium hirsutum OX=3635 GN=LOC107898920	LOC107898920	15.386	10.915	15	2	3	1	0.972	1.137	1.021	1.016	0.922	0.952	1.065	0.36216
A0A1U8IPF1	flowering time control protein FPA-like OS=Gossypium hirsutum OX=3635 GN=LOC107896915	LOC107896915	102.2	1.7087	6	5	5	2
A0A1U8IPF4	bifunctional epoxide hydrolase 2-like OS=Gossypium hirsutum OX=3635 GN=LOC107898944	LOC107898944	35.13	28.626	20.9	6	13	4	1.398	0.562	1.391	0.56	1.452	0.542	0.392	3.9135e-07
A0A1U8IPG7	Acyl-[acyl-carrier-protein]--UDP-N-acetylglucosamine O-acyltransferase OS=Gossypium arboreum OX=29729 GN=F383_04407 PE=4 SV=1	LOC107898949	50.359	2.7176	5.1	2	3	2	1.127	0.948	1.151	0.903	1.024	0.816	0.808	0.0197614
A0A1U8IPH4	major allergen Mal d 1-like OS=Gossypium hirsutum OX=3635 GN=LOC107898960	LOC107898960	17.074	6.1451	15.1	2	3	2	1.111	0.891	1.129	0.885	1.09	0.863	0.792	7.9094e-05
A0A1U8IPH8	pollen-specific leucine-rich repeat extensin-like protein 1 isoform X2 OS=Gossypium hirsutum OX=3635 GN=LOC107898955	LOC107898955	60.506	5.9363	8.7	5	8	3	0.993	1.084	0.881	1.016	1.01	1.05	1.092	0.12832
A0A1U8IPJ1	Nucleic acid-binding, OB-fold-like protein OS=Theobroma cacao OX=3641 GN=TCM_008182 PE=4 SV=1	LOC107898976	16.545	4.4346	16	3	4	3	1.016	1.052	0.933	1.114	0.881	1.042	1.134	0.052383
A0A1U8IPJ2	Protein EFR3 cmp44E OS=Gossypium arboreum OX=29729 GN=F383_16377 PE=4 SV=1	LOC107896942	93.169	1.7386	1.4	1	1	1
A0A1U8IPK6	E3 ubiquitin-protein ligase At3g02290-like OS=Gossypium hirsutum OX=3635 GN=LOC107898982	LOC107898982	25.974	1.1377	3.9	1	1	1
A0A1U8IPK8	transaldolase OS=Gossypium hirsutum OX=3635 GN=LOC107898983	LOC107898983	47.876	323.31	54.5	21	83	21	1.075	0.927	1.028	0.952	1.052	0.947	0.896	0.00196039
A0A1U8IPL0	glycine--tRNA ligase, mitochondrial 1-like OS=Gossypium hirsutum OX=3635 GN=LOC107898984	LOC107898984	82.136	285.98	42.7	30	79	30	0.979	1.013	0.926	1.088	0.942	1.091	1.121	0.0177041
A0A1U8IPL5	Branched-chain-amino-acid aminotransferase OS=Gossypium hirsutum OX=3635 GN=LOC107898986	LOC107898986	46.452	70.889	35.3	14	24	1	0.8	1.057	0.991	0.858	1.316	0.979	0.931	0.7484
A0A1U8IPM7	pentatricopeptide repeat-containing protein At1g02150-like OS=Gossypium hirsutum OX=3635 GN=LOC107896945	LOC107896945	61.146	1.6436	3.4	2	2	2
A0A1U8IPN0	ATP synthase subunit beta OS=Gossypium hirsutum OX=3635 GN=LOC107899003	LOC107899003	59.833	323.31	43.6	17	112	16	0.968	1.035	0.993	1.035	0.993	1.005	1.041	0.036502
A0A1U8IPP6	peroxisomal (S)-2-hydroxy-acid oxidase GLO4-like OS=Gossypium hirsutum OX=3635 GN=LOC107897418	LOC107897418	40.062	3.3374	5.5	2	4	1
A0A1U8IPQ5	protein SSUH2 homolog isoform X2 OS=Gossypium hirsutum OX=3635 GN=LOC107899030	LOC107899030	47.382	49.153	42	16	21	3	0.915	1.079	0.864	1.206	0.852	1.148	1.305	0.0024037
A0A1U8IPQ8	mitochondrial uncoupling protein 1 OS=Gossypium hirsutum OX=3635 GN=LOC107899031	LOC107899031	32.597	77.163	33.8	10	16	2	0.995	1.096	0.923	1.049	0.898	1.079	1.145	0.0149159
A0A1U8IPQ9	acetyl-coenzyme A carboxylase carboxyl transferase subunit alpha, chloroplastic-like OS=Gossypium hirsutum OX=3635 GN=LOC107899036	LOC107899036	84.666	62.639	29.5	21	35	8	1.087	0.908	1.118	0.931	1.055	0.885	0.836	0.00127872
A0A1U8IPR9	THO complex subunit 1-like isoform X3 OS=Gossypium hirsutum OX=3635 GN=LOC107897015	LOC107897015	62.26	22.387	7	3	3	3	0.953	1.026	1.009	1.061	0.969	1.001	1.054	0.094543
A0A1U8IPS1	E3 ubiquitin-protein ligase ORTHRUS 2-like OS=Gossypium hirsutum OX=3635 GN=LOC107899051	LOC107899051	73.41	1.0565	2.9	2	2	2	1.073	0.883	1.153	0.882	1.019	0.969	0.843	0.022719
A0A1U8IPS4	probable steroid-binding protein 3 OS=Gossypium hirsutum OX=3635 GN=LOC107899053	LOC107899053	20.574	6.6433	17.2	3	4	3	0.902	1.21	0.855	0.965	0.847	1.295	1.333	0.037185
A0A1U8IPS7	aspartyl protease AED3-like OS=Gossypium hirsutum OX=3635 GN=LOC107897026	LOC107897026	46.591	1.7409	9.1	4	8	1	1.184	0.954	1.106	0.886	0.975	0.873	0.831	0.044416
A0A1U8IPT8	40S ribosomal protein S19-3 OS=Gossypium hirsutum OX=3635 GN=LOC107897034	LOC107897034	15.938	23.803	41.3	7	17	2	0.903	1.163	0.9	1.142	0.866	1.036	1.252	0.004305
A0A1U8IPV1	4-coumarate--CoA ligase 1-like OS=Gossypium hirsutum OX=3635 GN=LOC107897473	LOC107897473	22.982	4.1043	26.6	5	5	2
A0A1U8IPV3	Eukaryotic translation initiation factor 3 subunit A OS=Gossypium hirsutum OX=3635 GN=LOC107899069	LOC107899069	113.54	215.61	39.6	38	57	15	0.988	1.001	0.951	0.961	0.98	1.133	1.06	0.33106
A0A1U8IPV8	topless-related protein 3-like OS=Gossypium hirsutum OX=3635 GN=LOC107899070	LOC107899070	125.27	56.132	22	19	26	13	1.107	0.842	1.185	0.884	1.056	0.851	0.77	0.0020418
A0A1U8IPW1	bis(5'-adenosyl)-triphosphatase-like isoform X1 OS=Gossypium hirsutum OX=3635 GN=LOC107897060	LOC107897060	23.063	5.7027	9	2	2	2	0.987	0.971	1.222	0.958	1.025	0.807	0.846	0.134258
A0A1U8IPW3	probable ribosomal protein S11, mitochondrial OS=Gossypium hirsutum OX=3635 GN=LOC107899075	LOC107899075	31.594	8.0547	13.1	3	4	3	1.084	0.941	1.04	0.978	0.974	0.985	0.937	0.135337
A0A1U8IPW6	Malate dehydrogenase OS=Gossypium hirsutum OX=3635 GN=LOC107897068	LOC107897068	35.564	28.981	51.8	17	59	5	1.048	0.939	1.032	0.975	1.106	0.821	0.858	0.051181
A0A1U8IPW8	Serine/threonine-protein phosphatase OS=Gossypium hirsutum OX=3635 GN=LOC107899082	LOC107899082	36.507	12.109	28.2	6	8	4	1.056	0.905	1.015	0.999	0.951	1.089	0.99	0.86014
A0A1U8IPX8	rapid alkalinization factor-like OS=Gossypium hirsutum OX=3635 GN=LOC107899086	LOC107899086	13.612	9.1051	27.4	3	5	1	0.807	1.103	0.847	1.086	0.741	1.519	1.548	0.021379
A0A1U8IPX9	UPF0587 protein C1orf123 homolog OS=Gossypium hirsutum OX=3635 GN=LOC107897078	LOC107897078	18.289	55.898	42.8	7	11	6	1.032	1.02	0.984	1.008	1.051	0.931	0.965	0.35536
A0A1U8IPY6	lysine-specific demethylase JMJ25-like isoform X2 OS=Gossypium hirsutum OX=3635 GN=LOC107899094	LOC107899094	106.57	15.852	7	6	7	6	1.045	0.894	1.043	1.006	1.075	0.987	0.913	0.070921
A0A1U8IPZ3	Mitochondrial Rho GTPase OS=Gossypium hirsutum OX=3635 GN=LOC107899108	LOC107899108	71.832	19.568	36.8	21	25	1	1.006	1.014	1.033	0.96	0.974	1.025	0.995	0.86554
A0A1U8IPZ6	guanine nucleotide-binding protein subunit beta-like protein OS=Gossypium hirsutum OX=3635 GN=LOC107899050	LOC107899050	35.989	-2	54.1	15	58	1
A0A1U8IQ01	T-complex protein 1 subunit delta OS=Gossypium hirsutum OX=3635 GN=LOC107899056	LOC107899056	52.391	8.3296	55	25	57	1	1.373	0.703	1.21	0.643	1.244	0.77	0.553	0.00078001
A0A1U8IQ21	probable protein phosphatase 2C 5 OS=Gossypium hirsutum OX=3635 GN=LOC107899066	LOC107899066	46.328	12.173	11.7	5	5	5	1.163	0.888	1.129	0.902	1.045	0.84	0.788	0.0035153
A0A1U8IQ37	Histone H2A OS=Gossypium hirsutum OX=3635 GN=LOC107899136	LOC107899136	14.758	2.5067	25	5	10	1	1.239	0.664	1.34	0.869	0.867	0.972	0.727	0.147617
A0A1U8IQ56	serine/threonine-protein kinase EDR1-like OS=Gossypium hirsutum OX=3635 GN=LOC107899145	LOC107899145	111.92	1.7921	4	3	3	1
A0A1U8IQ70	ER membrane protein complex subunit 2-like OS=Gossypium hirsutum OX=3635 GN=LOC107899150	LOC107899150	33.491	43.563	34	9	14	1	1.052	0.947	0.959	1.04	0.976	1.045	1.015	0.74784
A0A1U8IQ91	aquaporin PIP2-7-like OS=Gossypium hirsutum OX=3635 GN=LOC107897598	LOC107897598	29.878	4.2499	12.5	3	4	1	1.173	0.852	1.124	0.916	1.094	0.801	0.758	0.0031183
A0A1U8IQ93	malonate--CoA ligase-like OS=Gossypium hirsutum OX=3635 GN=LOC107897183	LOC107897183	65.886	144.69	27.8	15	30	3	1.197	0.704	1.222	0.804	1.285	0.744	0.608	0.00034136
A0A1U8IQ97	60S ribosomal protein L8-3 OS=Gossypium hirsutum OX=3635 GN=LOC107897605	LOC107897605	28.115	99.601	51.2	15	34	1	1.002	1.173	0.854	0.862	0.858	1.316	1.235	0.2209
A0A1U8IQB3	sucrose-phosphatase 2-like isoform X2 OS=Gossypium hirsutum OX=3635 GN=LOC107899194	LOC107899194	47.968	14.246	28.2	12	17	2	1.041	1.162	0.961	0.885	0.997	0.972	1.007	0.99344
A0A1U8IQC1	WD repeat-containing protein 48-like isoform X4 OS=Gossypium hirsutum OX=3635 GN=LOC107899144	LOC107899144	71.144	1.3053	8.5	5	5	1
A0A1U8IQD2	GDP-mannose 3,5-epimerase 1 OS=Gossypium hirsutum OX=3635 GN=LOC107899156	LOC107899156	42.396	7.286	58	22	54	2	1.011	0.907	0.851	0.973	1.027	1.274	1.092	0.5393
A0A1U8IQD8	LOW QUALITY PROTEIN: mediator of RNA polymerase II transcription subunit 14-like OS=Gossypium hirsutum OX=3635 GN=LOC107899159	LOC107899159	196.96	47.987	4.2	7	7	7	1.053	0.949	1.008	0.937	1.016	0.987	0.934	0.02912
A0A1U8IQE0	NADH dehydrogenase [ubiquinone] 1 alpha subcomplex subunit 8-B-like OS=Gossypium hirsutum OX=3635 GN=LOC107897637	LOC107897637	12.013	8.244	34.9	3	5	3	0.955	1.011	1.047	1.012	1.022	0.962	0.987	0.71762
A0A1U8IQE9	probable prolyl 4-hydroxylase 4 OS=Gossypium hirsutum OX=3635 GN=LOC107897647	LOC107897647	33.526	94.422	43.2	13	21	1	0.916	1.156	0.917	1.11	0.9	1.048	1.213	0.0027359
A0A1U8IQG5	heat shock 70 kDa protein 14-like OS=Gossypium hirsutum OX=3635 GN=LOC107897244	LOC107897244	94.408	105.12	43.5	38	87	9	1.027	0.931	0.955	1.005	1.036	1.043	0.987	0.76598
A0A1U8IQH4	multiprotein-bridging factor 1b OS=Gossypium hirsutum OX=3635 GN=LOC107897254	LOC107897254	15.556	42.956	31	5	13	3	1.249	0.813	1.164	0.801	1.189	0.745	0.655	0.00024097
A0A1U8IQH5	protein STRUBBELIG-RECEPTOR FAMILY 6-like OS=Gossypium hirsutum OX=3635 GN=LOC107897667	LOC107897667	78.716	7.1911	4.4	3	3	1	1.038	0.95	1.035	0.933	1.016	1.033	0.944	0.141821
A0A1U8IQI0	nucleolar and coiled-body phosphoprotein 1-like OS=Gossypium hirsutum OX=3635 GN=LOC107897258	LOC107897258	57.028	2.4815	2.1	1	1	1
A0A1U8IQJ5	pre-mRNA-processing-splicing factor 8-like OS=Gossypium hirsutum OX=3635 GN=LOC107897276	LOC107897276	274.87	33.74	4.9	8	8	8	0.902	0.948	0.895	1.018	0.924	1.377	1.229	0.23566
A0A1U8IQL0	protein ABHD11-like OS=Gossypium hirsutum OX=3635 GN=LOC107899254	LOC107899254	37.29	40.667	16.9	6	9	6	1.111	0.936	1.103	0.928	1.006	0.938	0.87	0.050117
A0A1U8IQL4	mediator of RNA polymerase II transcription subunit 15a-like OS=Gossypium hirsutum OX=3635 GN=LOC107897284	LOC107897284	147.15	4.4925	1.6	2	2	2
A0A1U8IQL6	protein MODIFIER OF SNC1 11-like isoform X2 OS=Gossypium hirsutum OX=3635 GN=LOC107899259	LOC107899259	21.462	16.17	24.5	3	4	2	0.938	1.014	1.094	1.023	1.027	0.902	0.961	0.54682
A0A1U8IQM2	signal recognition particle 54 kDa protein, chloroplastic-like OS=Gossypium hirsutum OX=3635 GN=LOC107899247	LOC107899247	62.064	1.7666	4.8	3	4	3
A0A1U8IQM7	probable aminopyrimidine aminohydrolase, mitochondrial OS=Gossypium hirsutum OX=3635 GN=LOC107899221	LOC107899221	62.898	8.8346	7.8	3	3	3	1.084	0.846	1.091	0.893	1.071	0.887	0.809	0.00028345
A0A1U8IQN1	UDP-glucuronic acid decarboxylase 1-like OS=Gossypium hirsutum OX=3635 GN=LOC107899272	LOC107899272	49.947	4.8825	18.3	11	18	1	1.095	0.918	1.003	0.959	0.895	1.152	1.012	0.91418
A0A1U8IQP3	mitochondrial phosphate carrier protein 3, mitochondrial-like OS=Gossypium hirsutum OX=3635 GN=LOC107897295	LOC107897295	40.55	60.279	28.6	12	33	1	0.924	1.134	0.886	1.033	0.949	1.123	1.192	0.0079611
A0A1U8IQQ3	diaminopimelate epimerase, chloroplastic-like OS=Gossypium hirsutum OX=3635 GN=LOC107899279	LOC107899279	39.15	1.1554	39.8	11	22	1	1.067	1.027	1.008	0.915	1.081	0.897	0.9	0.08626
A0A1U8IQU9	aldo-keto reductase family 4 member C9-like OS=Gossypium hirsutum OX=3635 GN=LOC107899336	LOC107899336	35.371	30.876	25.5	8	13	2	0.711	1.312	0.701	1.401	0.688	1.317	1.919	4.8728e-06
A0A1U8IQX1	aldo-keto reductase family 4 member C9-like OS=Gossypium hirsutum OX=3635 GN=LOC107899337	LOC107899337	31.819	12.879	26.6	8	15	1	0.859	1.038	0.988	1.177	1.042	0.916	1.084	0.44394
A0A1U8IQX2	Non-lysosomal glucosylceramidase OS=Gossypium hirsutum OX=3635 GN=LOC107897751	LOC107897751	93.054	1.1581	1	1	1	1
A0A1U8IQY3	60S ribosomal protein L26-1-like OS=Gossypium hirsutum OX=3635 GN=LOC107899345	LOC107899345	16.685	4.5713	45.2	8	25	0
A0A1U8IQY8	Phenylalanine ammonia-lyase OS=Gossypium hirsutum OX=3635 GN=LOC107899351	LOC107899351	78.384	5.1224	20.5	14	24	2	0.996	0.718	1.18	0.779	1.326	0.952	0.699	0.038659
A0A1U8IQY9	ESCRT-related protein CHMP1B OS=Gossypium hirsutum OX=3635 GN=LOC107897361	LOC107897361	22.639	3.8783	27.6	6	9	2	0.964	1.096	1.009	1	0.868	1.091	1.122	0.096502
A0A1U8IQZ5	hsp70 nucleotide exchange factor fes1-like OS=Gossypium hirsutum OX=3635 GN=LOC107899319	LOC107899319	40.918	17.523	29.6	11	20	2	0.987	0.976	1.049	0.999	1.02	0.974	0.965	0.141977
A0A1U8IR13	Voltage-dependent L-type calcium channel subunit alpha-1F OS=Gossypium arboreum OX=29729 GN=F383_07140 PE=4 SV=1	LOC107899368	23.593	20.281	17.7	3	5	2	0.876	1.045	0.897	1.091	0.958	1.185	1.216	0.012877
A0A1U8IR22	sugar transporter ERD6-like 5 isoform X3 OS=Gossypium hirsutum OX=3635 GN=LOC107899353	LOC107899353	17.268	3.057	13.4	2	2	0
A0A1U8IR26	universal stress protein YxiE-like OS=Gossypium hirsutum OX=3635 GN=LOC107899349	LOC107899349	18.248	95.918	64.5	13	32	8	0.598	1.482	0.675	1.395	0.654	1.294	2.165	0.000136721
A0A1U8IR49	Gamma-tubulin complex component OS=Gossypium hirsutum OX=3635 GN=LOC107899394	LOC107899394	96.965	2.1597	8.8	7	7	1
A0A1U8IR57	oligouridylate-binding protein 1B-like OS=Gossypium hirsutum OX=3635 GN=LOC107897416	LOC107897416	45.775	7.4093	19.2	7	9	1	1.037	0.944	1.018	0.999	1.047	0.956	0.935	0.023442
A0A1U8IR69	transcription initiation factor IIE subunit alpha-like OS=Gossypium hirsutum OX=3635 GN=LOC107897847	LOC107897847	53.278	3.657	2.5	1	1	1	0.801	1.141	1.137	1.038	0.935	0.965	1.094	0.4319
A0A1U8IR74	Methionine aminopeptidase 2 OS=Gossypium hirsutum OX=3635 GN=LOC107897851	LOC107897851	48.864	109.65	40.2	14	19	14	1.039	0.958	1.051	0.934	1.045	0.939	0.903	0.00026197
A0A1U8IR84	glutaredoxin-C4-like OS=Gossypium hirsutum OX=3635 GN=LOC107897861	LOC107897861	14.493	30.459	45.8	5	13	2	0.908	1.171	0.931	1.109	0.969	0.946	1.149	0.113002
A0A1U8IR91	formamidase-like isoform X1 OS=Gossypium hirsutum OX=3635 GN=LOC107899426	LOC107899426	49.704	4.0566	5.8	3	4	3	0.964	0.956	1.013	1.024	0.943	1.044	1.036	0.36584
A0A1U8IR96	zinc finger CCCH domain-containing protein 11-like OS=Gossypium hirsutum OX=3635 GN=LOC107899431	LOC107899431	41.629	5.7895	16.1	9	12	4	0.93	1.07	1.011	1.098	0.976	0.932	1.063	0.355
A0A1U8IRA3	Serine/threonine-protein kinase ATM OS=Gossypium arboreum OX=29729 GN=F383_23449 PE=4 SV=1	LOC107899434	173.07	41.736	9.4	10	11	5	1	0.93	1.08	1.051	1.031	0.905	0.928	0.20802
A0A1U8IRB0	Serine/threonine-protein kinase ATM OS=Gossypium arboreum OX=29729 GN=F383_18580 PE=4 SV=1	LOC107899439	195.31	43.075	9.5	12	13	5	0.925	0.955	1.097	0.967	0.925	1.151	1.043	0.64302
A0A1U8IRB9	casein kinase II subunit alpha-like OS=Gossypium hirsutum OX=3635 GN=LOC107899416	LOC107899416	50.091	4.0365	26.6	9	16	1	0.801	1.221	0.775	1.335	0.762	1.205	1.609	0.000179134
A0A1U8IRC4	protein YLS9-like OS=Gossypium hirsutum OX=3635 GN=LOC107899420	LOC107899420	23.626	10.395	15.3	3	5	2
A0A1U8IRC5	26S protease regulatory subunit 7 OS=Gossypium hirsutum OX=3635 GN=LOC107897470	LOC107897470	47.725	193.87	53.3	23	62	2	1.069	0.988	1.03	1.002	0.968	0.945	0.957	0.2691
A0A1U8IRC6	probable methyltransferase PMT9 isoform X2 OS=Gossypium hirsutum OX=3635 GN=LOC107897895	LOC107897895	70.523	12.552	12.9	8	9	2
A0A1U8IRF0	putative methylesterase 14, chloroplastic OS=Gossypium hirsutum OX=3635 GN=LOC107897492	LOC107897492	38.892	1.1155	7.5	3	3	1
A0A1U8IRF6	A-kinase anchor protein 12-like isoform X2 OS=Gossypium hirsutum OX=3635 GN=LOC107897915	LOC107897915	168.4	323.31	35.1	45	59	23	1.21	0.593	1.402	0.535	1.386	0.711	0.46	0.00122132
A0A1U8IRF7	cell division cycle protein 48 homolog OS=Gossypium hirsutum OX=3635 GN=LOC107899473	LOC107899473	89.533	132.11	63.9	45	114	0
A0A1U8IRG4	NADH dehydrogenase [ubiquinone] 1 beta subcomplex subunit 10-B-like OS=Gossypium hirsutum OX=3635 GN=LOC107897922	LOC107897922	12.437	9.0808	35.8	2	3	2	0.942	0.971	1.036	1.004	1.075	0.977	0.967	0.4725
A0A1U8IRG6	Sulfotransferase OS=Gossypium hirsutum OX=3635 GN=LOC107899488	LOC107899488	38.986	2.7378	30.6	10	15	3	1.183	0.86	1.132	0.838	1.176	0.759	0.704	0.0009595
A0A1U8IRH3	kanadaptin-like isoform X4 OS=Gossypium hirsutum OX=3635 GN=LOC107901790 PE=4 SV=1	LOC107899489	16.327	4.8928	8.5	1	1	1
A0A1U8IRH5	translin-like OS=Gossypium hirsutum OX=3635 GN=LOC107899466	LOC107899466	33.767	23.294	19	5	8	1	1.081	0.991	1.094	0.904	1.05	0.862	0.855	0.020701
A0A1U8IRH7	protein fluG-like OS=Gossypium hirsutum OX=3635 GN=LOC107899497	LOC107899497	93.324	22.635	12.6	10	13	10	0.741	1.295	0.684	1.264	0.714	1.362	1.833	4.2651e-05
A0A1U8IRJ1	WD repeat-containing protein 3-like OS=Gossypium hirsutum OX=3635 GN=LOC107899496	LOC107899496	102.82	11.027	3.6	3	3	3
A0A1U8IRK2	Protein yeeZ OS=Gossypium arboreum OX=29729 GN=F383_30556 PE=4 SV=1	LOC107897548	35.535	1.1664	2.8	1	1	1
A0A1U8IRK7	glutamyl-tRNA(Gln) amidotransferase subunit A-like OS=Gossypium hirsutum OX=3635 GN=LOC107898014	LOC107898014	76.559	17.302	13.3	8	10	7	0.806	1.177	0.881	1.108	0.785	1.368	1.478	0.0056753
A0A1U8IRK9	DEAD-box ATP-dependent RNA helicase 38-like OS=Gossypium hirsutum OX=3635 GN=LOC107899509	LOC107899509	55.729	16.755	33.5	18	29	2	1.106	0.871	1.053	0.961	1.081	0.917	0.848	0.0065368
A0A1U8IRL1	ras-related protein RABB1b OS=Gossypium hirsutum OX=3635 GN=LOC107897556	LOC107897556	23.218	57.577	55	11	18	1	1.107	0.868	1.101	0.852	1.096	0.952	0.809	0.025043
A0A1U8IRL3	ras-related protein RABC2a OS=Gossypium hirsutum OX=3635 GN=LOC107899493	LOC107899493	23.192	6.1141	20.8	4	8	2	1.201	0.865	1.1	0.86	1.092	0.846	0.758	0.0009023
A0A1U8IRM4	auxin transporter-like protein 2 OS=Gossypium hirsutum OX=3635 GN=LOC107899523	LOC107899523	54.386	13.521	5.4	2	2	1	1.23	0.602	1.47	0.664	1.343	0.556	0.451	0.00039647
A0A1U8IRN2	Threonine dehydratase OS=Gossypium hirsutum OX=3635 GN=LOC107899512	LOC107899512	66.675	6.9419	17.4	9	11	3	0.975	1.051	0.953	1.057	0.935	1.061	1.107	0.00121575
A0A1U8IRP3	probable pyridoxal 5'-phosphate synthase subunit PDX1 OS=Gossypium hirsutum OX=3635 GN=LOC107899534	LOC107899534	33.026	19.448	41.4	11	21	2	0.954	1.095	0.982	1.053	0.972	1.01	1.086	0.029822
A0A1U8IRQ3	Glutathione S-transferase 2 OS=Gossypium hirsutum OX=3635 GN=LOC107898050	LOC107898050	24.644	25.844	29.7	6	7	1	1.345	0.733	1.4	0.611	1.221	0.571	0.483	0.00099755
A0A1U8IRQ5	Peptidyl-prolyl cis-trans isomerase OS=Gossypium hirsutum OX=3635 GN=LOC107897606	LOC107897606	13.127	1.4331	42.6	8	11	1
A0A1U8IRR9	protein NETWORKED 4A-like OS=Gossypium hirsutum OX=3635 GN=LOC107899552	LOC107899552	66.854	20.587	13	7	7	7	1.296	0.595	1.275	0.673	1.421	0.656	0.482	0.000136376
A0A1U8IRS2	carbamoyl-phosphate synthase small chain, chloroplastic-like OS=Gossypium hirsutum OX=3635 GN=LOC107899531	LOC107899531	47.42	1.7836	20.4	7	10	2
A0A1U8IRS3	protease 2-like OS=Gossypium hirsutum OX=3635 GN=LOC107898079	LOC107898079	88.465	53.009	18.2	13	20	6	1.031	0.986	0.985	1.03	0.971	1.018	1.016	0.51836
A0A1U8IRU0	Syntaxin-binding protein 5-like protein OS=Gossypium arboreum OX=29729 GN=F383_31609 PE=4 SV=1	LOC107899543	120.21	41.477	8.6	8	10	8	1.095	0.893	1.008	0.977	1.052	1.012	0.913	0.10806
A0A1U8IRU1	BAG family molecular chaperone regulator 4-like OS=Gossypium hirsutum OX=3635 GN=LOC107899568	LOC107899568	17.112	4.3784	9.7	1	1	1
A0A1U8IRW0	gamma-interferon-inducible lysosomal thiol reductase-like OS=Gossypium hirsutum OX=3635 GN=LOC107899584	LOC107899584	29.025	19.07	22.4	6	9	6	1.312	0.445	1.781	0.478	1.393	0.476	0.312	0.00027785
A0A1U8IRY4	polygalacturonase-like OS=Gossypium hirsutum OX=3635 GN=LOC107899601	LOC107899601	41.557	5.4057	6.9	2	2	2	0.446	1.466	0.473	1.54	0.434	1.879	3.61	8.4811e-05
A0A1U8IRZ1	gamma-interferon-inducible lysosomal thiol reductase-like OS=Gossypium hirsutum OX=3635 GN=LOC107899583	LOC107899583	30.438	1.1438	3.4	1	1	1
A0A1U8IS12	glutathione S-transferase U17-like OS=Gossypium hirsutum OX=3635 GN=LOC107899606	LOC107899606	26.097	80.808	41.9	10	47	2	1.15	0.703	1.293	0.659	1.348	0.739	0.554	0.00052422
A0A1U8IS16	glutathione S-transferase U16-like OS=Gossypium hirsutum OX=3635 GN=LOC107899632	LOC107899632	25.946	40.525	17.5	4	6	4	0.869	1.179	0.891	1.079	0.838	1.103	1.294	0.00130482
A0A1U8IS21	cell division cycle protein 48 homolog OS=Gossypium hirsutum OX=3635 GN=LOC107897699	LOC107897699	89.566	24.361	61.1	44	110	1	0.974	0.919	0.949	1.005	1.035	1.142	1.037	0.65772
A0A1U8IS47	Cytokinin riboside 5'-monophosphate phosphoribohydrolase OS=Gossypium hirsutum OX=3635 GN=LOC107899641	LOC107899641	20.049	6.1555	11	2	2	1	0.639	1.428	0.619	1.301	0.684	1.49	2.173	9.9407e-05
A0A1U8IS53	red chlorophyll catabolite reductase, chloroplastic-like isoform X1 OS=Gossypium hirsutum OX=3635 GN=LOC107897716	LOC107897716	53.103	99.638	23.5	9	16	5
A0A1U8IS70	Glycylpeptide N-tetradecanoyltransferase OS=Gossypium hirsutum OX=3635 GN=LOC107897724	LOC107897724	50.012	6.5668	21.9	9	11	0
A0A1U8IS71	trafficking protein particle complex subunit 12-like OS=Gossypium hirsutum OX=3635 GN=LOC107899680	LOC107899680	41.796	5.8544	9.6	4	4	1	0.944	1.029	1.031	0.913	1.015	1.085	1.012	0.86532
A0A1U8IS85	probable phosphoribosylformylglycinamidine synthase, chloroplastic/mitochondrial OS=Gossypium hirsutum OX=3635 GN=LOC107898280	LOC107898280	161.56	43.768	19.8	29	43	5	1.008	0.905	1.055	0.93	1.068	0.978	0.898	0.020219
A0A1U8IS97	60S ribosomal protein L6 OS=Gossypium hirsutum OX=3635 GN=LOC107899683	LOC107899683	26.152	23.282	36.1	13	29	7	1.03	1.057	0.964	1.014	0.932	1.079	1.077	0.098165
A0A1U8ISA2	tetratricopeptide repeat protein 1-like OS=Gossypium hirsutum OX=3635 GN=LOC107899689	LOC107899689	30.55	8.3099	18.1	5	7	3	1.227	1.03	1.199	0.68	1.085	0.724	0.693	0.046904
A0A1U8ISB0	Elongation factor Ts, mitochondrial OS=Gossypium hirsutum OX=3635 GN=LOC107898300	LOC107898300	43.242	31.735	25	9	14	3	1.013	1.003	0.994	0.994	1.013	1.02	0.999	0.92318
A0A1U8ISB2	Protoporphyrinogen oxidase OS=Gossypium hirsutum OX=3635 GN=LOC107899705	LOC107899705	57.537	119.92	23.5	9	18	2	0.998	0.935	1.068	1.079	0.972	0.954	0.977	0.66634
A0A1U8ISB5	Glutathione reductase OS=Gossypium hirsutum OX=3635 GN=LOC107897752	LOC107897752	53.54	127.77	43.5	18	31	3	0.97	1.024	0.965	1.035	1.005	1.033	1.052	0.0185216
A0A1U8ISH6	21 kDa seed protein-like OS=Gossypium hirsutum OX=3635 GN=LOC107897808	LOC107897808	24.589	79.283	35.3	8	21	2	0.404	1.177	0.466	1.741	0.56	1.977	3.423	0.0026354
A0A1U8ISJ4	PRA1 family protein OS=Gossypium hirsutum OX=3635 GN=LOC107899839	LOC107899839	25.836	21.292	10.3	3	5	2	0.875	1.185	0.92	1.052	0.917	1.103	1.232	0.0055965
A0A1U8ISM3	ultraviolet-B receptor UVR8-like OS=Gossypium hirsutum OX=3635 GN=LOC107899831	LOC107899831	63.7	39.165	15.6	7	9	2	0.57	1.686	0.497	1.643	0.517	1.28	2.91	0.00039613
A0A1U8ISN8	Transducin/WD40 repeat-like superfamily protein isoform 2 OS=Theobroma cacao OX=3641 GN=TCM_039839 PE=4 SV=1	LOC107897862	143.55	10.609	24.3	25	39	2	1.072	0.938	1.039	0.901	1.078	0.963	0.879	0.0044998
A0A1U8ISQ8	probable methyltransferase PMT3 OS=Gossypium hirsutum OX=3635 GN=LOC107897883	LOC107897883	69.811	88.121	37.6	20	29	2	0.834	1.25	0.791	1.14	0.856	1.214	1.453	0.00047804
A0A1U8IST0	Gag-pro-like protein OS=Theobroma cacao OX=3641 GN=TCM_002389 PE=4 SV=1	LOC107899910	63.969	3.1006	3	1	1	1	0.825	1.093	0.926	1.102	1.202	0.867	1.037	0.76882
A0A1U8ISU5	probable RNA 3'-terminal phosphate cyclase-like protein isoform X2 OS=Gossypium hirsutum OX=3635 GN=LOC107899878	LOC107899878	34.527	6.0974	3.5	1	1	1	1.01	0.994	0.982	1.018	0.984	1.031	1.023	0.188119
A0A1U8ISV8	nucleobase-ascorbate transporter 11-like isoform X2 OS=Gossypium hirsutum OX=3635 GN=LOC107899929	LOC107899929	79.745	1.7227	1.2	1	1	1
A0A1U8ISZ8	SNW/SKI-interacting protein-like OS=Gossypium hirsutum OX=3635 GN=LOC107899967	LOC107899967	44.07	5.6304	25.1	11	18	1	1.021	0.854	1.125	0.913	1.095	0.973	0.845	0.023804
A0A1U8IT14	Coatomer subunit alpha OS=Gossypium hirsutum OX=3635 GN=LOC107898574	LOC107898574	136.27	6.4677	38.7	40	74	2	0.942	1.182	1.003	0.98	0.795	1.145	1.207	0.104044
A0A1U8IT18	Glycosyltransferase OS=Gossypium hirsutum OX=3635 GN=LOC107899989	LOC107899989	49.551	1.1415	2.2	1	1	1
A0A1U8IT40	Isopentenyl-diphosphate delta-isomerase OS=Gossypium arboreum OX=29729 GN=F383_08163 PE=4 SV=1	LOC107898604	36.988	25.047	12.5	4	5	3	1.004	0.884	0.999	1.046	1.009	1.071	0.996	0.9158
A0A1U8IT56	thioredoxin-like protein Clot OS=Gossypium hirsutum OX=3635 GN=LOC107900008	LOC107900008	15.259	0.92396	60.4	9	20	1	0.751	1.23	0.888	1.298	0.799	1.113	1.493	0.0037978
A0A1U8IT72	mitochondrial intermembrane space import and assembly protein 40-like OS=Gossypium hirsutum OX=3635 GN=LOC107898080	LOC107898080	15.954	1.8743	11.8	2	2	2
A0A1U8IT88	eukaryotic translation initiation factor 5B-like OS=Gossypium hirsutum OX=3635 GN=LOC107898638	LOC107898638	149.4	127.36	25	27	32	7	0.878	1.09	0.879	1.127	0.882	1.181	1.288	0.0084205
A0A1U8IT97	Endoglucanase E1 OS=Gossypium arboreum OX=29729 GN=F383_09225 PE=3 SV=1	LOC107898648	64.639	9.3077	9.3	5	5	5	0.852	1.374	0.741	1.248	0.743	1.252	1.658	0.00081807
A0A1U8ITA6	60S ribosomal protein L27a-3 OS=Gossypium hirsutum OX=3635 GN=LOC107898656	LOC107898656	16.344	58.568	37.7	5	20	3	0.969	1.037	0.989	1.043	0.999	0.951	1.025	0.4859
A0A1U8ITB1	eukaryotic peptide chain release factor GTP-binding subunit ERF3A-like OS=Gossypium hirsutum OX=3635 GN=LOC107898132	LOC107898132	59.597	3.4977	29.3	18	34	1	1.128	0.947	0.957	0.942	0.977	1.064	0.964	0.61864
A0A1U8ITB8	ATP-citrate synthase alpha chain protein 1 OS=Gossypium hirsutum OX=3635 GN=LOC107898661	LOC107898661	46.865	-2	21	10	16	1
A0A1U8ITC2	6,7-dimethyl-8-ribityllumazine synthase OS=Gossypium hirsutum OX=3635 GN=LOC107898667	LOC107898667	24.175	15.769	16.9	3	3	2
A0A1U8ITE3	cyclin-D4-2-like OS=Gossypium hirsutum OX=3635 GN=LOC107898682	LOC107898682	41.658	-2	2.7	1	1	1	0.765	1.174	0.843	1.172	0.885	1.243	1.44	0.00146406
A0A1U8ITE6	peamaclein-like OS=Gossypium hirsutum OX=3635 GN=LOC107900187	LOC107900187	10.45	9.7504	27.8	3	10	2	0.423	1.479	0.498	1.409	0.529	1.816	3.244	0.00033532
A0A1U8ITG4	cytochrome P450 77A4-like OS=Gossypium hirsutum OX=3635 GN=LOC107900179	LOC107900179	55.556	3.1777	6.7	3	4	0
A0A1U8ITI3	ARF guanine-nucleotide exchange factor GNOM-like OS=Gossypium hirsutum OX=3635 GN=LOC107898727	LOC107898727	163.92	45.478	11.8	16	18	15	0.999	0.983	0.967	0.906	0.936	1.199	1.064	0.55118
A0A1U8ITJ0	26S proteasome non-ATPase regulatory subunit 11 homolog OS=Gossypium hirsutum OX=3635 GN=LOC107898730	LOC107898730	47.056	20.451	48.3	17	34	3	0.969	1.002	1.005	1.075	0.883	1.097	1.111	0.088659
A0A1U8ITL8	RING-type E3 ubiquitin transferase OS=Gossypium hirsutum OX=3635 GN=LOC107900225	LOC107900225	89.98	5.5639	9.7	6	6	3	0.829	0.996	0.958	1.443	0.904	0.909	1.244	0.24726
A0A1U8ITP6	auxilin-related protein 2-like OS=Gossypium hirsutum OX=3635 GN=LOC107898285	LOC107898285	105.63	2.3008	13.7	11	14	1
A0A1U8ITP9	LOW QUALITY PROTEIN: phosphatidylinositol 4-kinase alpha 1-like OS=Gossypium hirsutum OX=3635 GN=LOC107898766	LOC107898766	218.96	110.11	15.8	25	29	3	1.072	0.907	1.04	0.901	1.151	0.911	0.833	0.026637
A0A1U8ITR7	translation initiation factor IF-2-like isoform X2 OS=Gossypium hirsutum OX=3635 GN=LOC107903367 PE=4 SV=1	LOC107900344	29.198	-2	3.4	1	1	1
A0A1U8ITU5	S-adenosylmethionine synthase OS=Gossypium hirsutum OX=3635 GN=LOC107898802	LOC107898802	42.614	5.4745	17.2	6	14	1
A0A1U8IU00	cucumisin-like isoform X1 OS=Gossypium hirsutum OX=3635 GN=LOC107900456	LOC107900456	79.097	106.67	20.3	13	21	3	0.43	1.395	0.447	1.615	0.416	2.043	3.908	0.00028047
A0A1U8IU09	Pyrroline-5-carboxylate reductase OS=Gossypium hirsutum OX=3635 GN=LOC107900495	LOC107900495	28.595	57.32	36.6	7	10	2	1.17	0.928	1.085	0.914	1.063	0.812	0.8	0.0119629
A0A1U8IU26	universal stress protein A-like protein OS=Gossypium hirsutum OX=3635 GN=LOC107898464	LOC107898464	17.348	1.3732	5.1	1	1	1
A0A1U8IU28	Carboxypeptidase OS=Gossypium hirsutum OX=3635 GN=LOC107898864	LOC107898864	53.743	6.1866	8.8	4	6	4	0.858	1.161	0.844	1.189	0.951	1.055	1.283	0.0087845
A0A1U8IU31	Peroxidase OS=Gossypium hirsutum OX=3635 GN=LOC107898474	LOC107898474	37.555	12.07	10	3	4	3	0.606	1.453	0.6	1.295	0.63	1.556	2.344	0.000103553
A0A1U8IU44	Zinc finger FYVE domain-containing protein 26 isoform 1 OS=Theobroma cacao OX=3641 GN=TCM_037126 PE=4 SV=1	LOC107900500	30.643	27.697	6.3	1	1	1	1.04	0.843	1.101	0.988	1.002	1.02	0.907	0.198156
A0A1U8IU50	Succinate dehydrogenase [ubiquinone] iron-sulfur subunit, mitochondrial OS=Gossypium hirsutum OX=3635 GN=LOC107898491	LOC107898491	31.921	69.69	41.5	12	24	2	0.985	0.971	1.046	0.978	1.078	0.939	0.929	0.067116
A0A1U8IU57	NF-X1-type zinc finger protein NFXL2 isoform X2 OS=Gossypium hirsutum OX=3635 GN=LOC107900535	LOC107900535	98.793	2.3841	1.8	1	1	1
A0A1U8IU58	ankyrin repeat domain-containing protein 2A-like OS=Gossypium hirsutum OX=3635 GN=LOC107898890	LOC107898890	37.714	40.382	34.3	10	28	0
A0A1U8IU70	TOM1-like protein 2 isoform X2 OS=Gossypium hirsutum OX=3635 GN=LOC107900513	LOC107900513	73.367	11.14	25.7	11	15	2	0.915	1.014	1.043	1.055	0.963	1.03	1.061	0.20328
A0A1U8IU73	CMP-sialic acid transporter 4 OS=Gossypium hirsutum OX=3635 GN=LOC107898903	LOC107898903	38.748	1.049	5.4	1	1	1
A0A1U8IU81	peptide-N4-(N-acetyl-beta- glucosaminyl)asparagine amidase A OS=Gossypium hirsutum OX=3635 GN=LOC107900555	LOC107900555	67.733	3.8566	2.3	1	1	1
A0A1U8IU87	DNA-directed RNA polymerases IV and V subunit 4-like OS=Gossypium hirsutum OX=3635 GN=LOC107900558	LOC107900558	23.272	3.8094	13.4	3	4	2	1.193	0.748	1.284	0.845	1.127	0.73	0.645	0.00172125
A0A1U8IU91	sorting and assembly machinery component 50 homolog OS=Gossypium hirsutum OX=3635 GN=LOC107900525	LOC107900525	59.952	27.383	10.4	6	10	6	1.002	1.03	1.004	1.008	0.946	1.023	1.037	0.149161
A0A1U8IUB5	multiple inositol polyphosphate phosphatase 1-like OS=Gossypium hirsutum OX=3635 GN=LOC107900553	LOC107900553	44.532	23.655	22.2	7	8	5	1.035	0.967	0.946	1.007	1.039	1.02	0.991	0.829
A0A1U8IUC4	Protein DETOXIFICATION OS=Gossypium hirsutum OX=3635 GN=LOC107898538	LOC107898538	62.464	5.6228	4	2	2	2
A0A1U8IUD5	Separin OS=Gossypium arboreum OX=29729 GN=F383_21078 PE=4 SV=1	LOC107900583	18.027	7.9976	15.6	2	4	2	1.136	0.97	1.026	0.848	1.095	0.91	0.838	0.022057
A0A1U8IUF6	ubiquitin carboxyl-terminal hydrolase 24-like isoform X2 OS=Gossypium hirsutum OX=3635 GN=LOC107900574	LOC107900574	59.775	20.509	12	5	5	1	1.104	0.957	1.083	0.977	0.994	0.872	0.882	0.057564
A0A1U8IUF9	phenylalanine--tRNA ligase alpha subunit, cytoplasmic OS=Gossypium hirsutum OX=3635 GN=LOC107898564	LOC107898564	55.937	19.824	25.4	13	17	13	1.099	0.974	1.028	0.908	0.942	1	0.939	0.30996
A0A1U8IUG7	cation/calcium exchanger 4-like isoform X2 OS=Gossypium hirsutum OX=3635 GN=LOC107900604	LOC107900604	65.348	1.8249	2.5	1	2	1	0.683	1.463	0.689	1.267	0.737	1.292	1.907	0.00022365
A0A1U8IUH3	LOW QUALITY PROTEIN: E3 ubiquitin-protein ligase UPL1-like OS=Gossypium hirsutum OX=3635 GN=LOC107900609	LOC107900609	399.4	3.8418	4.9	14	14	2	0.706	1.159	0.893	1.085	0.974	1.253	1.359	0.039981
A0A1U8IUH6	RNA polymerase II C-terminal domain phosphatase-like 3 OS=Gossypium hirsutum OX=3635 GN=LOC107898990	LOC107898990	140.07	1.3417	1.8	2	2	2	1.01	0.999	1.067	0.937	1.058	0.923	0.912	0.035618
A0A1U8IUH7	Aminomethyltransferase OS=Gossypium hirsutum OX=3635 GN=LOC107900587	LOC107900587	44.215	46.981	28.7	12	18	0
A0A1U8IUI3	Peptidyl-prolyl cis-trans isomerase OS=Gossypium hirsutum OX=3635 GN=LOC107898587	LOC107898587	18.286	12.261	69.4	12	40	4	1.152	0.882	0.999	0.853	1.184	0.891	0.787	0.0121008
A0A1U8IUJ3	cytochrome P450 71D10-like OS=Gossypium hirsutum OX=3635 GN=LOC107898600	LOC107898600	57.929	3.2014	12.2	5	7	1	0.677	1.443	0.77	1.265	0.663	1.311	1.905	0.00045779
A0A1U8IUK2	aldehyde dehydrogenase family 7 member B4-like OS=Gossypium hirsutum OX=3635 GN=LOC107900603	LOC107900603	54.523	123.21	29.1	12	23	12	1.139	0.906	1.099	0.875	1.139	0.828	0.773	0.00085544
A0A1U8IUK7	cullin-associated NEDD8-dissociated protein 1-like OS=Gossypium hirsutum OX=3635 GN=LOC107900608	LOC107900608	134.27	175.52	31.5	35	53	35	1.065	0.88	1.078	0.936	1.071	0.935	0.856	0.0016593
A0A1U8IUL9	ranBP2-type zinc finger protein At1g67325-like isoform X4 OS=Gossypium hirsutum OX=3635 GN=LOC107898617	LOC107898617	30.917	5.5561	9.8	3	4	1	1.21	0.954	1.177	0.788	1.1	0.719	0.706	0.0157169
A0A1U8IUM8	60S ribosomal protein L17-2-like OS=Gossypium hirsutum OX=3635 GN=LOC107898628	LOC107898628	20.173	9.2443	29.8	8	15	0
A0A1U8IUM9	glycine-rich cell wall structural protein-like OS=Gossypium hirsutum OX=3635 GN=LOC107924096 PE=4 SV=1	LOC107900623	15.509	4.1877	22	2	2	2	0.913	0.967	0.955	0.851	1.271	1.046	0.912	0.52072
A0A1U8IUN0	external alternative NAD(P)H-ubiquinone oxidoreductase B2, mitochondrial-like OS=Gossypium hirsutum OX=3635 GN=LOC107900620	LOC107900620	67.265	119.16	28.8	13	16	13	0.666	1.319	0.678	1.271	0.635	1.547	2.09	0.00031871
A0A1U8IUP4	kinesin-like protein KCA2 OS=Gossypium hirsutum OX=3635 GN=LOC107898636	LOC107898636	141.73	12.398	18	19	20	1	1.088	0.832	1.102	0.934	1.112	0.906	0.809	0.0037634
A0A1U8IUQ4	ketol-acid reductoisomerase, chloroplastic-like OS=Gossypium hirsutum OX=3635 GN=LOC107900646	LOC107900646	63.828	1.3513	32.2	16	53	1
A0A1U8IUS4	single-stranded DNA-binding protein, mitochondrial isoform X2 OS=Gossypium hirsutum OX=3635 GN=LOC107899067	LOC107899067	23.56	21.315	39.2	6	9	6	0.955	1.037	1.036	0.963	1.021	0.971	0.986	0.7113
A0A1U8IUT8	Hedgehog-interacting protein OS=Theobroma cacao OX=3641 GN=TCM_026671 PE=4 SV=1	LOC107899083	30.818	17.319	22.3	4	7	4	0.925	1.072	0.959	1.101	0.87	1.078	1.18	0.0048786
A0A1U8IUV0	Pectin acetylesterase OS=Gossypium hirsutum OX=3635 GN=LOC107900704	LOC107900704	43.456	128.28	47.1	20	49	3	0.499	1.71	0.503	1.155	0.552	1.801	3.003	0.00167862
A0A1U8IUW2	AP-4 complex subunit epsilon OS=Gossypium hirsutum OX=3635 GN=LOC107900692	LOC107900692	105.09	21.338	15.7	12	17	3	1	0.94	0.954	1.011	0.928	0.986	1.019	0.56886
A0A1U8IUW5	conserved oligomeric Golgi complex subunit 6-like isoform X2 OS=Gossypium hirsutum OX=3635 GN=LOC107900684	LOC107900684	77.078	63.622	28.1	17	22	17	1.021	0.981	0.979	0.999	0.957	0.99	1.004	0.8222
A0A1U8IUX1	Clustered mitochondria protein homolog OS=Gossypium hirsutum OX=3635 GN=LOC107900724	LOC107900724	157.15	65.861	23.2	26	33	7	1.047	0.992	0.931	0.986	1.008	1.078	1.023	0.62876
A0A1U8IUX9	L10-interacting MYB domain-containing protein-like isoform X2 OS=Gossypium hirsutum OX=3635 GN=LOC107900736	LOC107900736	17.19	-2	6.8	1	1	1	0.755	1.141	0.812	1.052	0.974	1.348	1.394	0.034203
A0A1U8IUY6	alpha-crystallin domain-containing protein 22.3-like isoform X2 OS=Gossypium hirsutum OX=3635 GN=LOC107899118	LOC107899118	22.184	17.203	17.1	3	4	3	0.996	0.978	1.072	0.996	1.053	0.898	0.92	0.097584
A0A1U8IV08	UPF0483 protein AGAP003155-like OS=Gossypium hirsutum OX=3635 GN=LOC107900757	LOC107900757	26.483	5.8142	18.1	4	4	4	0.714	1.263	0.785	1.232	0.745	1.274	1.68	5.9382e-05
A0A1U8IV10	Glutamate dehydrogenase OS=Gossypium hirsutum OX=3635 GN=LOC107899137	LOC107899137	44.502	92.087	45.5	15	28	7	0.982	1.074	1.017	1.025	0.911	1.043	1.08	0.092342
A0A1U8IV14	ADP,ATP carrier protein 1, mitochondrial-like OS=Gossypium hirsutum OX=3635 GN=LOC107900742	LOC107900742	42.529	12.04	31.8	12	58	1	0.905	1.006	0.97	1.096	0.973	1.083	1.118	0.035363
A0A1U8IV20	protein RRP6-like 3 isoform X2 OS=Gossypium hirsutum OX=3635 GN=LOC107898747	LOC107898747	106.15	1.5194	2.5	2	2	2
A0A1U8IV29	NAD(P)H-hydrate epimerase OS=Gossypium hirsutum OX=3635 GN=LOC107900746	LOC107900746	52.789	4.9198	18.2	9	12	1
A0A1U8IV33	perakine reductase-like OS=Gossypium hirsutum OX=3635 GN=LOC107899154	LOC107899154	37.581	31.227	59.9	18	91	1	0.817	1.104	0.762	1.002	0.948	1.459	1.411	0.061024
A0A1U8IV37	DNA-directed RNA polymerase subunit beta OS=Gossypium arboreum OX=29729 GN=F383_20410 PE=4 SV=1	LOC107900759	41.655	69.961	33.8	9	13	8	0.619	1.522	0.645	1.541	0.545	1.252	2.385	0.00050074
A0A1U8IV42	alpha-N-acetylglucosaminidase-like isoform X2 OS=Gossypium hirsutum OX=3635 GN=LOC107900763	LOC107900763	89.301	1.8437	1.9	2	2	2
A0A1U8IV50	flowering locus K homology domain-like isoform X2 OS=Gossypium hirsutum OX=3635 GN=LOC107899167	LOC107899167	54.383	83.654	33.2	15	20	0
A0A1U8IV57	GRF1-interacting factor 1-like isoform X2 OS=Gossypium hirsutum OX=3635 GN=LOC107899170	LOC107899170	19.276	12.516	17	3	3	1
A0A1U8IV58	trihelix transcription factor ASIL2-like OS=Gossypium hirsutum OX=3635 GN=LOC107900801	LOC107900801	41.645	14.541	11	3	3	1	1.146	0.818	1.164	0.906	1.052	0.877	0.774	0.0041571
A0A1U8IV66	protein VASCULAR ASSOCIATED DEATH 1, chloroplastic-like isoform X3 OS=Gossypium hirsutum OX=3635 GN=LOC107900809	LOC107900809	65.555	6.3375	3.4	2	2	2	1.137	0.96	1.03	0.939	1.007	0.92	0.888	0.040359
A0A1U8IV68	GDSL esterase/lipase LTL1-like isoform X2 OS=Gossypium hirsutum OX=3635 GN=LOC107899179	LOC107899179	36.2	34.377	17.8	3	3	2	0.927	1.044	1.008	0.973	1.105	0.949	0.976	0.71422
A0A1U8IV75	Chitinase-like protein OS=Arabidopsis thaliana OX=3702 GN=At1g08530 PE=2 SV=1	LOC107899184	31.905	4.9635	4.4	1	2	1	1.049	0.996	0.858	1.024	1.038	1.065	1.048	0.5019
A0A1U8IV98	ATP-dependent Clp protease proteolytic subunit OS=Gossypium hirsutum OX=3635 GN=LOC107898796	LOC107898796	42.417	62.983	15.9	5	6	5	1.006	0.994	1	1.051	1.029	0.962	0.991	0.7358
A0A1U8IV99	LOW QUALITY PROTEIN: ubiquitin carboxyl-terminal hydrolase 12-like OS=Gossypium hirsutum OX=3635 GN=LOC107899198	LOC107899198	130.84	20.523	23.8	33	53	3	1.084	0.949	1.053	0.988	1.074	0.942	0.897	0.0030807
A0A1U8IVA2	Nucleoside diphosphate kinase OS=Gossypium hirsutum OX=3635 GN=LOC107900804	LOC107900804	16.424	96.029	50	8	21	8	1.011	0.97	1.074	0.961	1.007	0.932	0.926	0.033445
A0A1U8IVC5	40S ribosomal protein S13-like OS=Gossypium hirsutum OX=3635 GN=LOC107900848	LOC107900848	17.141	14.512	51.7	9	22	1	0.918	1.132	0.876	1.149	0.885	1.063	1.248	0.00133983
A0A1U8IVD4	transducin beta-like protein 2 OS=Gossypium hirsutum OX=3635 GN=LOC107900853	LOC107900853	47.613	33.113	19.7	8	12	4	0.972	0.945	0.961	1.045	0.897	1.221	1.135	0.197757
A0A1U8IVD5	60S ribosomal protein L4-like OS=Gossypium hirsutum OX=3635 GN=LOC107898817	LOC107898817	44.815	9.2381	50.7	19	40	2	1.161	0.951	1.009	1.064	0.912	1.07	1.001	0.9583
A0A1U8IVD7	GTPase LSG1-2-like OS=Gossypium hirsutum OX=3635 GN=LOC107900816	LOC107900816	66.605	10.279	9	5	6	1	0.984	1.017	0.957	1.039	0.946	1.088	1.089	0.02116
A0A1U8IVE8	heat shock cognate 70 kDa protein 2-like OS=Gossypium hirsutum OX=3635 GN=LOC107898826	LOC107898826	70.982	66.163	59	36	181	3	1.096	0.928	1.088	0.947	1.088	0.904	0.849	0.0002801
A0A1U8IVG5	AT-hook motif nuclear-localized protein 1-like OS=Gossypium hirsutum OX=3635 GN=LOC107900856	LOC107900856	34.968	6.8026	14.9	4	6	2	1.067	0.834	1.205	0.881	1.054	0.926	0.794	0.0117991
A0A1U8IVG6	tRNA 2'-phosphotransferase 1 isoform X2 OS=Gossypium hirsutum OX=3635 GN=LOC107900847	LOC107900847	24.254	4.5669	6.5	1	1	1	0.984	0.985	1.083	0.902	0.966	1.089	0.981	0.7662
A0A1U8IVH5	Peptidyl-prolyl cis-trans isomerase OS=Gossypium hirsutum OX=3635 GN=LOC107900866	LOC107900866	17.404	14.435	33.8	5	7	5	1.038	0.995	1.027	1.021	1.015	0.937	0.959	0.17898
A0A1U8IVI4	sphingoid long-chain bases kinase 2, mitochondrial-like OS=Gossypium hirsutum OX=3635 GN=LOC107900873	LOC107900873	39.104	1.51	2.5	1	2	1	1.063	0.84	1.071	1	1.03	0.987	0.893	0.114036
A0A1U8IVI5	brefeldin A-inhibited guanine nucleotide-exchange protein 2 OS=Gossypium hirsutum OX=3635 GN=LOC107900862	LOC107900862	199.03	1.2207	7.8	14	17	2
A0A1U8IVI7	40S ribosomal protein S14 OS=Gossypium hirsutum OX=3635 GN=LOC107899252	LOC107899252	16.38	8.9742	46.7	8	29	0
A0A1U8IVJ2	Reduced growth phenotype protein 1 OS=Corchorus capsularis OX=210143 GN=CCACVL1_24385 PE=4 SV=1	LOC107898860	61.717	9.0239	11.1	5	5	5	0.95	0.99	1.021	1.01	1.026	1.016	1.006	0.80522
A0A1U8IVJ3	sorting nexin 1-like OS=Gossypium hirsutum OX=3635 GN=LOC107899256	LOC107899256	46.339	12.282	20.9	9	10	3
A0A1U8IVJ5	multifunctional methyltransferase subunit TRM112-like protein At1g22270 OS=Gossypium hirsutum OX=3635 GN=LOC107900868	LOC107900868	14.205	4.8097	15.3	2	2	2	0.817	1.114	0.983	1.077	0.942	1.11	1.204	0.029641
A0A1U8IVM1	Acyl-coenzyme A thioesterase 13 OS=Gossypium arboreum OX=29729 GN=F383_25567 PE=4 SV=1	LOC107900905	15.735	18.514	24	3	4	2	1.025	0.954	1.029	0.981	1.094	0.928	0.909	0.023295
A0A1U8IVN0	protein QUIRKY-like OS=Gossypium hirsutum OX=3635 GN=LOC107900891	LOC107900891	112.32	6.6585	15.4	15	20	1	1.011	1.1	0.963	0.956	0.994	0.996	1.028	0.58158
A0A1U8IVN7	Hexosyltransferase OS=Gossypium hirsutum OX=3635 GN=LOC107900915	LOC107900915	76.601	9.3988	4.9	3	4	2	1.08	0.882	0.944	1.156	1.069	0.869	0.94	0.53702
A0A1U8IVP3	54S ribosomal protein L17, mitochondrial-like OS=Gossypium hirsutum OX=3635 GN=LOC107900919	LOC107900919	26.592	6.1809	18.6	4	4	4	1.103	0.946	1.088	0.916	1.059	0.867	0.84	0.0033808
A0A1U8IVP8	protein EXORDIUM-like 5 OS=Gossypium hirsutum OX=3635 GN=LOC107898907	LOC107898907	37.828	2.8203	9.4	2	2	2	0.685	1.304	1.091	1.088	0.784	1.104	1.366	0.094139
A0A1U8IVQ0	DEAD-box ATP-dependent RNA helicase 8-like OS=Gossypium hirsutum OX=3635 GN=LOC107900897	LOC107900897	56.819	3.8955	32.7	14	29	1	0.929	1.062	0.976	1.118	0.923	1.025	1.133	0.015382
A0A1U8IVQ4	probable beta-D-xylosidase 7 OS=Gossypium hirsutum OX=3635 GN=LOC107900898	LOC107900898	84.635	188.84	31.6	21	38	17	0.889	1.103	0.84	1.199	0.836	1.19	1.361	0.00074306
A0A1U8IVS2	Reticulon-like protein OS=Gossypium hirsutum OX=3635 GN=LOC107900922	LOC107900922	28.521	3.614	19.6	7	17	1
A0A1U8IVS7	Glycosyltransferase OS=Gossypium hirsutum OX=3635 GN=LOC107900926	LOC107900926	33.835	1.1225	4.3	1	1	1
A0A1U8IVS8	1D-myo-inositol 2-amino-2-deoxy-alpha-D-glucopyranoside ligase OS=Gossypium arboreum OX=29729 GN=F383_03214 PE=4 SV=1	LOC107898939	10.613	13.171	24.7	3	6	2	0.787	1.203	0.832	1.079	0.948	1.226	1.367	0.0099237
A0A1U8IVT3	NADPH-protochlorophyllide oxidoreductase OS=Gossypium hirsutum OX=3635 GN=LOC107898942	LOC107898942	42.918	18.168	16.7	6	7	3	1.073	0.884	1.152	1.027	1.016	0.822	0.843	0.081637
A0A1U8IVU2	bifunctional epoxide hydrolase 2-like OS=Gossypium hirsutum OX=3635 GN=LOC107898947	LOC107898947	35.283	11.863	12.1	4	5	2
A0A1U8IVU7	thioredoxin-1-like OS=Gossypium hirsutum OX=3635 GN=LOC107898951	LOC107898951	20.787	3.6643	11.6	2	2	1	0.869	1.135	0.964	1.111	0.954	1.003	1.166	0.038622
A0A1U8IVU9	serine/threonine-protein kinase ATG1c-like isoform X2 OS=Gossypium hirsutum OX=3635 GN=LOC107899344	LOC107899344	68.845	1.3703	1.9	1	2	1	0.895	1.055	0.91	1.045	0.894	1.26	1.245	0.07196
A0A1U8IVV1	protein DOWNSTREAM OF FLC-like OS=Gossypium hirsutum OX=3635 GN=LOC107900932	LOC107900932	17.442	10.565	17	2	2	2	0.725	1.212	0.758	1.247	0.793	1.378	1.686	0.00036374
A0A1U8IVW2	mitochondrial import receptor subunit TOM40-1-like OS=Gossypium hirsutum OX=3635 GN=LOC107900970	LOC107900970	32.028	5.8141	18.8	4	10	1	0.901	1	1.075	0.989	0.949	1.107	1.058	0.41056
A0A1U8IVX9	Transmembrane 9 superfamily member OS=Gossypium hirsutum OX=3635 GN=LOC107899369	LOC107899369	67.78	52.711	21.6	14	24	8	1.304	0.777	1.247	0.667	1.184	0.736	0.584	0.00051582
A0A1U8IW10	dolichyl-phosphate beta-glucosyltransferase-like OS=Gossypium hirsutum OX=3635 GN=LOC107900980	LOC107900980	26.26	34.797	13.4	3	4	1	0.987	1.075	0.941	1.038	0.971	1.016	1.079	0.024222
A0A1U8IW18	PHD finger protein ALFIN-LIKE 4-like isoform X2 OS=Gossypium hirsutum OX=3635 GN=LOC107901006	LOC107901006	27.933	9.7766	7.3	2	4	1	1.228	0.777	1.084	0.82	1.316	0.71	0.636	0.003078
A0A1U8IW21	BEL1-like homeodomain protein 1 OS=Gossypium hirsutum OX=3635 GN=LOC107899402	LOC107899402	71.038	1.1468	1.4	1	1	1
A0A1U8IW26	Protein virilizer OS=Gossypium arboreum OX=29729 GN=F383_23117 PE=4 SV=1	LOC107899405	239.7	1.1232	5.9	11	12	1	1.043	0.968	0.992	0.83	1.079	1.097	0.93	0.40272
A0A1U8IW32	syntaxin-121-like OS=Gossypium hirsutum OX=3635 GN=LOC107899409	LOC107899409	36.507	18.709	15	4	5	0
A0A1U8IW34	alpha-aminoadipic semialdehyde synthase-like OS=Gossypium hirsutum OX=3635 GN=LOC107900997	LOC107900997	96.478	9.9185	11.3	10	14	4	1.176	0.75	1.219	0.808	0.961	0.822	0.709	0.0128216
A0A1U8IW47	conserved oligomeric Golgi complex subunit 3-like OS=Gossypium hirsutum OX=3635 GN=LOC107900994	LOC107900994	88.431	1.3351	15.7	12	15	1
A0A1U8IW51	nuclear poly(A) polymerase 1-like isoform X2 OS=Gossypium hirsutum OX=3635 GN=LOC107899058	LOC107899058	84.509	20.887	5.9	3	3	3
A0A1U8IW55	Fructose-bisphosphate aldolase OS=Gossypium hirsutum OX=3635 GN=LOC107899428	LOC107899428	38.654	323.31	64	22	108	2	0.721	1.251	0.731	1.106	0.782	1.356	1.662	0.00142104
A0A1U8IW63	Sucrose synthase OS=Gossypium hirsutum OX=3635 GN=LOC107901027	LOC107901027	92.4	279.71	50.2	44	131	11	0.942	1.035	0.956	1.033	0.96	1.01	1.077	0.00158481
A0A1U8IW80	ubiquinone biosynthesis protein COQ9-B, mitochondrial-like OS=Gossypium hirsutum OX=3635 GN=LOC107901047	LOC107901047	33.556	1.0408	25.4	6	11	1	0.846	0.927	1.024	0.909	1.29	0.998	0.897	0.4913
A0A1U8IW95	copper transporter 5-like OS=Gossypium hirsutum OX=3635 GN=LOC107901056	LOC107901056	15.557	8.6492	22.9	2	4	2	1.094	0.852	1.068	0.908	1.093	0.969	0.838	0.009476
A0A1U8IWB4	DNA replication and repair recF OS=Gossypium arboreum OX=29729 GN=F383_25107 PE=4 SV=1	LOC107901039	201.7	15.73	2.2	3	3	3	0.961	0.974	1.004	1.015	0.977	1.125	1.058	0.28514
A0A1U8IWD0	phospholipid:diacylglycerol acyltransferase 1-like isoform X2 OS=Gossypium hirsutum OX=3635 GN=LOC107901080	LOC107901080	74.399	0.95121	1.6	1	1	1
A0A1U8IWD8	peroxisomal and mitochondrial division factor 2-like OS=Gossypium hirsutum OX=3635 GN=LOC107901065	LOC107901065	33.638	22.181	27.7	11	14	2	1.265	0.791	1.191	0.708	1.263	0.703	0.592	0.00025937
A0A1U8IWE4	Glycosyltransferase OS=Gossypium hirsutum OX=3635 GN=LOC107899500	LOC107899500	53.758	6.831	9.5	5	6	5	0.893	1.264	0.864	0.878	0.857	1.319	1.324	0.177976
A0A1U8IWE8	39S ribosomal protein L45, mitochondrial-like isoform X2 OS=Gossypium hirsutum OX=3635 GN=LOC107899128	LOC107899128	34.274	10.677	12.1	4	4	4	0.988	0.987	1.04	0.959	1.029	1.004	0.965	0.158959
A0A1U8IWF4	vacuolar protein-sorting-associated protein 37 homolog 1-like OS=Gossypium hirsutum OX=3635 GN=LOC107899507	LOC107899507	26.45	10.546	20.4	4	5	4	1.061	0.927	1.159	0.911	1.03	0.889	0.839	0.0096375
A0A1U8IWH5	Cysteine synthase OS=Gossypium hirsutum OX=3635 GN=LOC107899147	LOC107899147	34.065	124.59	45.4	12	48	1	1.12	1.041	1.098	0.775	1.072	0.871	0.817	0.136778
A0A1U8IWH7	zinc finger CCCH domain-containing protein 64-like OS=Gossypium hirsutum OX=3635 GN=LOC107901111	LOC107901111	67.42	10.602	8.9	4	4	4	0.923	1.073	0.951	1.155	0.914	1.022	1.166	0.0153785
A0A1U8IWI1	probable aldo-keto reductase 1 OS=Gossypium hirsutum OX=3635 GN=LOC107899155	LOC107899155	37.414	77.688	58.1	18	105	4	0.918	1.138	0.913	1.07	0.931	1.059	1.183	0.00195714
A0A1U8IWI7	ectonucleotide pyrophosphatase/phosphodiesterase family member 3-like OS=Gossypium hirsutum OX=3635 GN=LOC107901121	LOC107901121	54.26	16.253	11.6	4	6	1	0.985	1.03	1.072	0.956	0.978	0.985	0.979	0.59822
A0A1U8IWJ7	dnaJ homolog subfamily B member 13-like OS=Gossypium hirsutum OX=3635 GN=LOC107899535	LOC107899535	37.82	3.4116	13.7	4	6	1
A0A1U8IWJ9	Alpha/beta-Hydrolases superfamily protein OS=Theobroma cacao OX=3641 GN=TCM_046919 PE=4 SV=1	LOC107901106	30.104	4.5078	8.9	2	2	2
A0A1U8IWK1	probable protein arginine N-methyltransferase 1.2 OS=Gossypium hirsutum OX=3635 GN=LOC107901133	LOC107901133	44.523	22.984	22.9	6	7	6	1.092	0.993	1.051	0.905	1.012	0.96	0.906	0.046843
A0A1U8IWK6	60S ribosomal protein L28-2-like OS=Gossypium hirsutum OX=3635 GN=LOC107901137	LOC107901137	16.804	11.075	47.3	8	14	4	0.986	1.042	0.924	1.085	0.938	1.06	1.119	0.0078649
A0A1U8IWL3	enhanced ethylene response protein 5-like OS=Gossypium hirsutum OX=3635 GN=LOC107901119	LOC107901119	47.693	2.2595	3.9	2	3	2
A0A1U8IWL4	protein SCO1 homolog 1, mitochondrial-like OS=Gossypium hirsutum OX=3635 GN=LOC107899545	LOC107899545	35.998	108.3	27.4	8	10	8	1.08	1.064	1.058	0.839	1.082	0.809	0.842	0.173197
A0A1U8IWL9	syntaxin-132-like OS=Gossypium hirsutum OX=3635 GN=LOC107899188	LOC107899188	34.627	13.427	24.4	7	11	1
A0A1U8IWN7	60S ribosomal protein L31-like OS=Gossypium hirsutum OX=3635 GN=LOC107901141	LOC107901141	14.048	5.2528	28.1	4	10	4	1.006	1.055	0.947	1.052	1.002	0.946	1.033	0.48064
A0A1U8IWQ6	xaa-Pro dipeptidase-like OS=Gossypium hirsutum OX=3635 GN=LOC107901132	LOC107901132	56.038	25.794	10.9	4	4	4	0.965	0.986	1.018	0.963	1.044	1.036	0.986	0.68316
A0A1U8IWS5	Alpha/beta-Hydrolases superfamily protein OS=Theobroma cacao OX=3641 GN=TCM_022567 PE=4 SV=1	LOC107899224	41.861	1.6269	6.1	2	3	1
A0A1U8IWS7	gamma-glutamyltranspeptidase 3-like OS=Gossypium hirsutum OX=3635 GN=LOC107901150	LOC107901150	67.956	12.249	5.6	3	3	3	0.816	1.218	0.861	1.099	0.845	1.241	1.411	0.00110414
A0A1U8IWV4	probable uridine nucleosidase 2 isoform X2 OS=Gossypium hirsutum OX=3635 GN=LOC107899602	LOC107899602	34.67	6.0298	14.6	5	6	5	0.94	1.049	1.133	0.945	0.956	1.128	1.031	0.71172
A0A1U8IWV6	Serpentine receptor class alpha-12 OS=Gossypium arboreum OX=29729 GN=F383_11478 PE=4 SV=1	LOC107899249	51.64	38.755	18.6	9	11	9	1.557	0.432	1.389	0.52	1.48	0.5	0.328	6.445e-05
A0A1U8IWY0	dnaJ homolog subfamily C GRV2-like isoform X1 OS=Gossypium hirsutum OX=3635 GN=LOC107901210	LOC107901210	281.69	102.24	10.2	22	26	22	1.152	0.811	1.1	0.784	1.099	1.037	0.785	0.049559
A0A1U8IWY4	26S protease regulatory subunit 8 homolog A isoform X2 OS=Gossypium hirsutum OX=3635 GN=LOC107901192	LOC107901192	47.181	4.1104	55.4	21	46	0
A0A1U8IWY7	glutathione S-transferase U17-like OS=Gossypium hirsutum OX=3635 GN=LOC107899633	LOC107899633	25.866	21.901	22.6	6	11	6	0.89	1.077	0.922	1.126	0.915	1.12	1.219	0.00036169
A0A1U8IWZ0	protein SLOW GREEN 1, chloroplastic-like OS=Gossypium hirsutum OX=3635 GN=LOC107899275	LOC107899275	39.088	20.075	21.9	7	10	1
A0A1U8IX01	V-type proton ATPase subunit G OS=Gossypium hirsutum OX=3635 GN=LOC107899649	LOC107899649	12.329	12.398	53.6	5	12	2	0.686	1.317	0.826	1.334	0.78	1.097	1.635	0.0042201
A0A1U8IX03	ras-related protein RABE1c-like isoform X2 OS=Gossypium hirsutum OX=3635 GN=LOC107899284	LOC107899284	23.776	13.382	54.4	14	29	2	1.503	0.758	1.274	0.531	1.365	0.435	0.416	0.0060008
A0A1U8IX24	Aspartyl/glutamyl-tRNA (Asn/Gln) amidotransferase subunit B OS=Gossypium arboreum OX=29729 GN=F383_18086 PE=4 SV=1	LOC107901222	24.058	1.587	13.6	3	3	3	0.972	0.988	1.073	1.004	0.864	1.124	1.071	0.39534
A0A1U8IX32	interactor of constitutive active ROPs 2, chloroplastic-like OS=Gossypium hirsutum OX=3635 GN=LOC107899675	LOC107899675	70.205	3.7934	3.2	2	2	2	1.12	0.86	1.062	0.832	1.238	0.851	0.744	0.0030616
A0A1U8IX49	UPF0261 protein mll9388 OS=Gossypium hirsutum OX=3635 GN=LOC107901251	LOC107901251	80.087	101.49	27.3	17	26	17	1.07	0.91	1.026	0.946	1.104	0.955	0.878	0.0074761
A0A1U8IX60	COP9 signalosome complex subunit 3-like OS=Gossypium hirsutum OX=3635 GN=LOC107899702	LOC107899702	47.78	2.1564	17.7	7	12	1	1.142	0.907	1.054	0.922	1.05	0.908	0.843	0.0036793
A0A1U8IX63	Aspartate aminotransferase OS=Gossypium hirsutum OX=3635 GN=LOC107901245	LOC107901245	44.248	168.04	42.5	16	45	10	0.901	1.171	0.858	1.138	0.862	1.12	1.308	0.000184191
A0A1U8IX68	protein tesmin/TSO1-like CXC 5 isoform X2 OS=Gossypium hirsutum OX=3635 GN=LOC107901249	LOC107901249	64.974	2.6089	2.8	2	2	2	1.184	0.86	1.151	0.822	1.059	0.886	0.757	0.0022377
A0A1U8IX69	aldo-keto reductase family 4 member C9-like OS=Gossypium hirsutum OX=3635 GN=LOC107899342	LOC107899342	35.215	32.92	35.9	13	23	2	0.827	1.204	0.739	1.231	0.741	1.342	1.637	0.00057908
A0A1U8IX81	Methyl-CpG-binding domain-containing 10-like protein OS=Gossypium arboreum OX=29729 GN=F383_02666 PE=4 SV=1	LOC107901311	20.36	11.472	33.3	5	5	3	0.735	1.254	0.931	0.97	0.911	1.27	1.356	0.059204
A0A1U8IX98	Dihydropyrimidinase-related 3-A OS=Gossypium arboreum OX=29729 GN=F383_29637 PE=4 SV=1	LOC107901294	36.129	9.6145	8.7	2	3	2	0.913	1.058	0.922	1.085	0.951	1.113	1.169	0.001235
A0A1U8IXA0	protein NUCLEAR FUSION DEFECTIVE 4-like isoform X2 OS=Gossypium hirsutum OX=3635 GN=LOC107899727	LOC107899727	52.618	10.398	4.6	2	2	1	1.035	0.939	1.07	0.961	0.96	1.04	0.959	0.40362
A0A1U8IXA5	NADH-cytochrome b5 reductase OS=Gossypium hirsutum OX=3635 GN=LOC107901281	LOC107901281	35.614	21.61	31.9	11	28	3	1.064	0.988	1.052	0.983	1.051	0.85	0.891	0.139744
A0A1U8IXB0	LETM1-like protein OS=Corchorus capsularis OX=210143 GN=CCACVL1_11962 PE=4 SV=1	LOC107899738	96.397	3.571	2.2	2	2	2	1.013	0.9	1.061	0.955	1.041	1.03	0.926	0.131697
A0A1U8IXB2	synaptotagmin-5-like OS=Gossypium hirsutum OX=3635 GN=LOC107901333	LOC107901333	61.262	16.718	14.5	8	10	2	0.961	1.025	0.939	1.06	0.943	1.109	1.123	0.0083388
A0A1U8IXB5	protein EMSY-LIKE 1-like isoform X2 OS=Gossypium hirsutum OX=3635 GN=LOC107899744	LOC107899744	37.833	7.008	12.4	4	4	4	1.002	1.007	1.163	0.911	1.034	0.863	0.869	0.094045
A0A1U8IXC0	Hematological and neurological expressed 1-like protein OS=Theobroma cacao OX=3641 GN=TCM_001123 PE=4 SV=1	LOC107899745	32.651	32.891	29.5	8	9	2	0.941	1.034	0.975	1.024	1.069	0.971	1.015	0.73178
A0A1U8IXC5	protein TONNEAU 1a-like OS=Gossypium hirsutum OX=3635 GN=LOC107899753	LOC107899753	25.173	3.506	17.4	4	5	1
A0A1U8IXD9	TBCC domain-containing protein 1-like isoform X2 OS=Gossypium hirsutum OX=3635 GN=LOC107899760	LOC107899760	58.979	46.467	17.8	7	11	3	0.992	1.032	1.029	1.027	0.928	1.034	1.049	0.25014
A0A1U8IXE1	topless-related protein 4-like isoform X3 OS=Gossypium hirsutum OX=3635 GN=LOC107901318	LOC107901318	122.74	25.075	16.2	18	28	1
A0A1U8IXE3	Envelope glycoprotein B OS=Gossypium arboreum OX=29729 GN=F383_21294 PE=4 SV=1	LOC107901354	61.783	1.6727	1.6	1	1	1	0.679	1.182	0.774	1.073	0.651	1.788	1.922	0.0187797
A0A1U8IXE8	DExH-box ATP-dependent RNA helicase DExH1-like OS=Gossypium hirsutum OX=3635 GN=LOC107899406	LOC107899406	104.75	35.103	12.2	10	10	3	1.043	0.973	0.992	0.993	1.011	0.998	0.973	0.176321
A0A1U8IXE9	40S ribosomal protein S11-like OS=Gossypium hirsutum OX=3635 GN=LOC107901359	LOC107901359	17.894	3.1952	39	9	16	1	0.834	1.078	1.038	0.981	0.818	1.306	1.251	0.121702
A0A1U8IXG5	zinc finger BED domain-containing protein DAYSLEEPER-like OS=Gossypium hirsutum OX=3635 GN=LOC107901323	LOC107901323	77.022	12.417	24.3	13	19	1	1.067	0.97	1.026	0.882	1.068	0.983	0.897	0.03994
A0A1U8IXH5	calmodulin-binding receptor-like cytoplasmic kinase 3 isoform X2 OS=Gossypium hirsutum OX=3635 GN=LOC107901332	LOC107901332	55.651	0.97563	3.8	2	2	2
A0A1U8IXH6	ATPase family AAA domain-containing protein 3C-like OS=Gossypium hirsutum OX=3635 GN=LOC107901343	LOC107901343	69.805	50.791	19.8	12	17	2	1.04	0.888	1.061	0.978	1.052	0.974	0.901	0.030158
A0A1U8IXK8	ras-related protein Rab11A-like OS=Gossypium hirsutum OX=3635 GN=LOC107899881	LOC107899881	24.674	17.013	35.3	8	14	2	1.179	0.74	1.14	0.754	1.196	0.944	0.694	0.0094605
A0A1U8IXL0	dnaJ protein homolog OS=Gossypium hirsutum OX=3635 GN=LOC107901342	LOC107901342	46.231	28.43	38.8	17	45	1	0.889	1.099	0.817	1.251	0.831	1.189	1.395	0.00189933
A0A1U8IXL8	palmitoyl-protein thioesterase 1-like OS=Gossypium hirsutum OX=3635 GN=LOC107899896	LOC107899896	26.07	14.941	13	3	6	2	1.176	0.703	1.211	0.876	1.166	0.795	0.668	0.003258
A0A1U8IXP3	long chain acyl-CoA synthetase 9, chloroplastic-like OS=Gossypium hirsutum OX=3635 GN=LOC107901415	LOC107901415	75.459	45.624	16.2	9	14	9	1.271	0.77	1.223	0.785	1.188	0.71	0.615	0.000181206
A0A1U8IXR0	Aldehyde dehydrogenase OS=Gossypium hirsutum OX=3635 GN=LOC107901426	LOC107901426	53.655	18.869	14.1	7	9	5	0.847	1.251	0.759	1.223	0.723	1.342	1.638	0.00081752
A0A1U8IXR3	transcriptional corepressor LEUNIG-like OS=Gossypium hirsutum OX=3635 GN=LOC107901393	LOC107901393	101.95	27.412	11.7	9	9	8	1.107	0.845	1.138	0.902	1.102	0.825	0.768	0.00075733
A0A1U8IXS0	polyadenylate-binding protein-interacting protein 5 isoform X2 OS=Gossypium hirsutum OX=3635 GN=LOC107901381	LOC107901381	20.97	16.642	19.8	3	6	3	1.123	0.948	1.131	0.801	1.127	0.838	0.765	0.033062
A0A1U8IXT2	replication factor C subunit 4 OS=Gossypium hirsutum OX=3635 GN=LOC107901388	LOC107901388	37.861	34.865	27.2	8	8	8	1.15	0.875	1.15	0.894	1.051	0.846	0.78	0.00190182
A0A1U8IXT7	probable LRR receptor-like serine/threonine-protein kinase At4g08850 OS=Gossypium hirsutum OX=3635 GN=LOC107901454	LOC107901454	47.973	-2	2.5	1	1	1	1.007	0.93	1.052	0.913	1.063	1.035	0.922	0.123485
A0A1U8IXU3	Gamma-glutamylcyclotransferase OS=Gossypium hirsutum OX=3635 GN=LOC107901405	LOC107901405	26.287	18.243	26.7	5	6	1	1.011	0.967	0.992	1.017	0.986	1.044	1.013	0.62554
A0A1U8IXV2	probable L-ascorbate peroxidase 6, chloroplastic OS=Gossypium hirsutum OX=3635 GN=LOC107901425	LOC107901425	46.09	11.503	32.9	13	22	4	1.106	0.879	1.134	0.903	1.068	0.87	0.802	0.0004357
A0A1U8IXX4	sec-independent protein translocase protein TATB, chloroplastic-like OS=Gossypium hirsutum OX=3635 GN=LOC107901469	LOC107901469	28.645	3.0328	10.2	2	2	2	1.046	0.985	1.039	1.025	0.974	0.933	0.962	0.33478
A0A1U8IXX6	protein transport protein Sec24-like At4g32640 OS=Gossypium hirsutum OX=3635 GN=LOC107901421	LOC107901421	118.61	119.74	18.9	19	31	4	0.944	1.014	0.979	0.995	0.945	1.216	1.124	0.15654
A0A1U8IXY3	beta-fructofuranosidase, insoluble isoenzyme CWINV1-like isoform X1 OS=Gossypium hirsutum OX=3635 GN=LOC107901479	LOC107901479	65.908	3.3121	31.3	16	25	2	1.155	0.817	1.194	0.794	1.213	0.765	0.667	7.5503e-05
A0A1U8IXZ5	14-3-3 protein 7-like OS=Gossypium hirsutum OX=3635 GN=LOC107901460	LOC107901460	28.68	162.97	62.2	18	63	3	0.976	0.974	1.016	0.958	1.025	1.068	0.994	0.86758
A0A1U8IY08	PITH domain-containing protein 1-like OS=Gossypium hirsutum OX=3635 GN=LOC107901495	LOC107901495	22.635	56.807	33.3	6	9	6	1.104	0.93	1.095	0.932	1.089	0.848	0.824	0.02512
A0A1U8IY21	40S ribosomal protein S4 OS=Gossypium hirsutum OX=3635 GN=LOC107899589	LOC107899589	29.574	40.718	58	15	56	1	0.994	1.019	0.911	1.16	0.779	1.201	1.259	0.055403
A0A1U8IY40	subtilisin-like protease SBT1.7 OS=Gossypium hirsutum OX=3635 GN=LOC107900081	LOC107900081	80.598	0.94277	19.2	11	20	0
A0A1U8IY48	protein STRICTOSIDINE SYNTHASE-LIKE 3-like OS=Gossypium hirsutum OX=3635 GN=LOC107901491	LOC107901491	43.855	72.589	60.4	18	45	3	1.356	0.681	1.264	0.656	1.296	0.643	0.506	1.68466e-05
A0A1U8IY54	vacuolar-processing enzyme-like OS=Gossypium hirsutum OX=3635 GN=LOC107901497	LOC107901497	54.157	12.536	10.9	5	6	4	0.978	0.978	1.021	1.059	1.024	0.946	0.987	0.71742
A0A1U8IY71	Serine hydroxymethyltransferase OS=Gossypium hirsutum OX=3635 GN=LOC107901493	LOC107901493	56.423	129.44	33.6	15	28	2	1	0.935	1.079	0.968	1.08	0.969	0.909	0.027919
A0A1U8IY82	putative esterase YitV OS=Gossypium hirsutum OX=3635 GN=LOC107901547	LOC107901547	39.846	111.87	43.9	14	23	1	0.803	1.307	0.851	1.139	0.824	1.156	1.454	0.00134149
A0A1U8IYA4	syntaxin-71-like OS=Gossypium hirsutum OX=3635 GN=LOC107899658	LOC107899658	30.013	30.888	53.2	12	19	3	1.059	1.019	1.016	1.008	0.957	0.957	0.984	0.68306
A0A1U8IYA8	suppressor of RPS4-RLD 1 OS=Gossypium hirsutum OX=3635 GN=LOC107900153	LOC107900153	124.13	14.972	6	6	6	6	1.189	0.896	0.954	1.006	0.991	0.967	0.915	0.32694
A0A1U8IYC1	ER membrane protein complex subunit 1-like OS=Gossypium hirsutum OX=3635 GN=LOC107901545	LOC107901545	110.02	88.66	20.5	18	28	5	1.021	1.06	0.927	0.985	0.927	1.116	1.099	0.122775
A0A1U8IYC3	nuclear pore complex protein NUP85-like OS=Gossypium hirsutum OX=3635 GN=LOC107901527	LOC107901527	80.38	28.749	15.5	9	12	2
A0A1U8IYC7	actin-like OS=Gossypium hirsutum OX=3635 GN=LOC107899682	LOC107899682	41.711	-2	46.7	14	86	0
A0A1U8IYD6	Ribosomal protein L37 OS=Gossypium hirsutum OX=3635 GN=LOC107901560	LOC107901560	10.904	4.6285	33.7	4	4	2	1.411	0.807	1.043	0.837	1.251	0.58	0.6	0.024181
A0A1U8IYF0	DEAD-box ATP-dependent RNA helicase 56-like OS=Gossypium hirsutum OX=3635 GN=LOC107901605	LOC107901605	48.475	3.038	32.9	12	38	1
A0A1U8IYH4	coiled-coil domain-containing protein R3HCC1L-like OS=Gossypium hirsutum OX=3635 GN=LOC107899692	LOC107899692	40.044	1.6718	6.6	2	3	1	0.877	1.127	0.929	1.187	0.912	1.014	1.224	0.0152957
A0A1U8IYH8	40S ribosomal protein S12 OS=Gossypium hirsutum OX=3635 GN=LOC107901582	LOC107901582	14.669	2.6221	36.2	6	25	1
A0A1U8IYI2	leucine aminopeptidase 1-like OS=Gossypium hirsutum OX=3635 GN=LOC107901597	LOC107901597	60.642	150.52	50.9	22	59	4	1.07	0.918	1.072	0.896	1.094	0.901	0.839	6.3586e-05
A0A1U8IYL3	Chaperone DnaK OS=Gossypium arboreum OX=29729 GN=F383_31418 PE=4 SV=1	LOC107901615	63.316	5.2648	7.7	4	4	4	1.008	0.955	0.985	0.984	0.969	1.122	1.033	0.5803
A0A1U8IYL7	nucleolar and coiled-body phosphoprotein 1-like OS=Gossypium hirsutum OX=3635 GN=LOC107901619	LOC107901619	104.92	4.4581	13	12	12	2	0.935	0.832	1.045	1.099	1.105	0.983	0.945	0.55354
A0A1U8IYL9	Annexin OS=Gossypium hirsutum OX=3635 GN=LOC107899755	LOC107899755	35.822	5.9609	62	23	66	3	0.746	1.179	0.799	1.19	0.905	1.27	1.485	0.0028779
A0A1U8IYM1	protein WVD2-like 6 OS=Gossypium hirsutum OX=3635 GN=LOC107901611	LOC107901611	49.876	2.6186	14.8	7	9	1	1.076	0.859	1.235	0.788	1.161	0.828	0.713	0.00199927
A0A1U8IYP0	splicing factor 3B subunit 2-like OS=Gossypium hirsutum OX=3635 GN=LOC107901670	LOC107901670	68.808	5.8535	2	1	1	1	0.917	1.072	1.108	1.058	1.005	0.837	0.979	0.81484
A0A1U8IYR9	ER membrane protein complex subunit 4-like OS=Gossypium hirsutum OX=3635 GN=LOC107901650	LOC107901650	19.352	41.314	22.9	4	6	1	0.912	1.051	0.981	1.014	1.059	1.002	1.039	0.43002
A0A1U8IYT2	NAD(P)-binding Rossmann-fold superfamily protein isoform 1 OS=Theobroma cacao OX=3641 GN=TCM_029648 PE=4 SV=1	LOC107901706	66.398	37.312	22.2	11	13	11	1.088	1.002	1.092	0.991	0.874	0.958	0.966	0.71626
A0A1U8IZ06	vacuolar protein sorting-associated protein 29-like OS=Gossypium hirsutum OX=3635 GN=LOC107901715	LOC107901715	13.201	11.54	45.2	5	8	3	1.055	0.948	0.974	0.893	1.054	1.005	0.923	0.135859
A0A1U8IZ23	Aspartate aminotransferase OS=Gossypium hirsutum OX=3635 GN=LOC107900511	LOC107900511	49.53	9.4438	37.8	14	26	2	0.855	1.161	0.764	1.121	0.861	1.328	1.456	0.004401
A0A1U8IZ29	probable folate-biopterin transporter 7 isoform X2 OS=Gossypium hirsutum OX=3635 GN=LOC107901722	LOC107901722	40.548	0.93337	2.1	1	1	1
A0A1U8IZ41	At4g31080 OS=Arabidopsis thaliana OX=3702 GN=At4g31080 PE=1 SV=1	LOC107901747	43.232	19.476	19.4	9	10	9	1.199	0.82	1.113	0.809	1.191	0.842	0.705	0.000196671
A0A1U8IZ45	Clathrin heavy chain OS=Gossypium hirsutum OX=3635 GN=LOC107900528	LOC107900528	193.48	65.181	39.8	61	122	10	0.989	0.914	1.012	0.934	1.04	1.116	0.975	0.6729
A0A1U8IZ54	UDP-glycosyltransferase TURAN OS=Gossypium hirsutum OX=3635 GN=LOC107900527	LOC107900527	56.417	13.925	6.1	2	2	2	0.958	1.049	0.933	1.101	0.939	1.056	1.133	0.00188484
A0A1U8IZA7	pentatricopeptide repeat-containing protein At3g13160, mitochondrial-like OS=Gossypium hirsutum OX=3635 GN=LOC107901777	LOC107901777	43.423	8.3054	13.6	5	8	5	1.066	0.858	1.061	0.942	1.066	0.999	0.877	0.094655
A0A1U8IZB2	non-classical arabinogalactan protein 31-like isoform X2 OS=Gossypium hirsutum OX=3635 GN=LOC107901805	LOC107901805	32.813	63.106	28.9	8	17	1	0.491	1.319	0.474	1.531	0.513	1.91	3.221	0.00045955
A0A1U8IZC3	Serine/threonine-protein phosphatase OS=Gossypium hirsutum OX=3635 GN=LOC107900551	LOC107900551	107.94	11.335	27.8	20	26	2	1.05	0.978	1.062	0.936	0.99	0.985	0.935	0.06672
A0A1U8IZD2	auxin-repressed 12.5 kDa protein-like isoform X2 OS=Gossypium hirsutum OX=3635 GN=LOC107901799	LOC107901799	12.174	37.109	55.9	4	9	4	1.16	0.719	1.268	0.732	1.377	0.666	0.556	0.00052109
A0A1U8IZD8	60S ribosomal protein L36 OS=Gossypium hirsutum OX=3635 GN=LOC107901807	LOC107901807	12.702	15.785	35.7	5	10	2	1.024	0.997	1	1.079	1.016	0.866	0.968	0.62672
A0A1U8IZF8	SH3 domain-containing protein 3-like OS=Gossypium hirsutum OX=3635 GN=LOC107901833	LOC107901833	39.086	68.098	39.6	15	29	1	0.943	1.001	0.95	1.05	1.061	1.015	1.038	0.39776
A0A1U8IZH7	putative pterin-4-alpha-carbinolamine dehydratase isoform X2 OS=Gossypium hirsutum OX=3635 GN=LOC107901837	LOC107901837	20.556	3.0866	10.8	2	3	2	0.874	1.167	1.113	0.93	0.937	0.996	1.058	0.59436
A0A1U8IZM1	Protein ROOT HAIR DEFECTIVE 3 homolog OS=Gossypium hirsutum OX=3635 GN=LOC107901903	LOC107901903	92.076	12.2	5.6	5	6	1
A0A1U8IZN8	guanylate-binding protein 7-like OS=Gossypium hirsutum OX=3635 GN=LOC107901894	LOC107901894	120.39	20.802	24.2	29	37	2
A0A1U8IZQ1	organellar oligopeptidase A, chloroplastic/mitochondrial-like OS=Gossypium hirsutum OX=3635 GN=LOC107901902	LOC107901902	79.898	270.36	47.9	30	54	16	1.052	0.944	1.021	1.029	1.004	0.995	0.965	0.27038
A0A1U8IZR3	ubiquitin receptor RAD23b-like OS=Gossypium hirsutum OX=3635 GN=LOC107901916	LOC107901916	39.815	1.1721	11.8	4	5	0
A0A1U8IZT3	heat shock 70 kDa protein, mitochondrial-like isoform X1 OS=Gossypium hirsutum OX=3635 GN=LOC107901919	LOC107901919	72.967	79.622	36.7	27	65	2	0.904	1.072	0.899	1.068	0.971	1.081	1.161	0.026801
A0A1U8IZU6	probable beta-D-xylosidase 6 OS=Gossypium hirsutum OX=3635 GN=LOC107901940	LOC107901940	86.949	36.794	12.1	9	13	8	0.971	1.11	0.916	1.164	0.854	1.045	1.211	0.0167597
A0A1U8IZW3	dehydrogenase/reductase SDR family member 12-like OS=Gossypium hirsutum OX=3635 GN=LOC107901970	LOC107901970	36.972	21.976	15.2	4	5	4	0.988	1.198	0.911	1.113	0.807	1.034	1.236	0.042198
A0A1U8IZW7	Leucine--tRNA ligase OS=Gossypium arboreum OX=29729 GN=F383_30234 PE=4 SV=1	LOC107901978	21.974	46.795	33.7	8	14	8	1.267	0.706	1.298	0.658	1.208	0.673	0.54	3.5729e-05
A0A1U8IZX2	haloacid dehalogenase-like hydrolase domain-containing protein 3 OS=Gossypium hirsutum OX=3635 GN=LOC107900399	LOC107900399	28.778	20.843	23.5	7	9	7	0.876	1.188	0.806	1.204	0.829	1.224	1.44	0.00014383
A0A1U8IZY2	Lactoylglutathione lyase OS=Gossypium hirsutum OX=3635 GN=LOC107901961	LOC107901961	32.591	8.4768	44.6	12	49	1	1.077	0.827	1.097	0.985	1.181	0.794	0.777	0.023459
A0A1U8IZZ5	importin-5-like OS=Gossypium hirsutum OX=3635 GN=LOC107901999	LOC107901999	122.91	130.09	26.6	26	50	4	1.4	0.73	1.22	0.665	1.247	0.743	0.553	0.00041883
A0A1U8IZZ9	Phox/Bem1p OS=Corchorus olitorius OX=93759 GN=COLO4_31629 PE=4 SV=1	LOC107901991	45.524	4.1315	4.8	2	2	2
A0A1U8J013	Folylpolyglutamate synthase OS=Gossypium hirsutum OX=3635 GN=LOC107900458	LOC107900458	52.347	18.07	11.5	4	5	4	1.083	0.948	1.1	0.878	1.154	0.971	0.838	0.0078402
A0A1U8J024	Peroxidase OS=Gossypium hirsutum OX=3635 GN=LOC107901996	LOC107901996	37.205	25.908	13	4	12	1	0.554	1.563	0.658	1.403	0.663	1.315	2.283	0.00043713
A0A1U8J046	temperature-induced lipocalin-1-like OS=Gossypium hirsutum OX=3635 GN=LOC107900483	LOC107900483	20.848	88.743	51.4	10	34	10	1.25	0.712	1.232	0.788	1.258	0.634	0.571	0.0122567
A0A1U8J056	putative methyltransferase DDB_G0268948 isoform X1 OS=Gossypium hirsutum OX=3635 GN=LOC107900494	LOC107900494	29.938	48.878	36.2	6	8	1
A0A1U8J075	LOW QUALITY PROTEIN: transcription factor MYB44 OS=Gossypium hirsutum OX=3635 GN=LOC107900510	LOC107900510	29.213	2.7046	4.5	1	1	1	1.038	0.981	1.111	1	0.96	0.903	0.928	0.2302
A0A1U8J077	DNA topoisomerase 1-like isoform X3 OS=Gossypium hirsutum OX=3635 GN=LOC107902034	LOC107902034	122.82	3.231	2.6	2	2	2
A0A1U8J078	ubiquitin fusion degradation protein 1 homolog OS=Gossypium hirsutum OX=3635 GN=LOC107902026	LOC107902026	36.017	13.407	35	11	15	3	1.16	0.988	1.094	0.718	0.999	0.744	0.753	0.056585
A0A1U8J081	Calcium homeostasis endoplasmic reticulum OS=Gossypium arboreum OX=29729 GN=F383_31680 PE=4 SV=1	LOC107902035	74.061	20.791	10	5	6	1	1.149	1.022	1.058	0.925	0.993	0.84	0.871	0.119316
A0A1U8J093	plasminogen activator inhibitor 1 RNA-binding protein-like OS=Gossypium hirsutum OX=3635 GN=LOC107900808	LOC107900808	39.087	99.813	51.9	17	46	3	0.884	1.09	0.995	1.036	0.991	0.926	1.063	0.38208
A0A1U8J0A5	PHD finger protein ALFIN-LIKE 2 isoform X2 OS=Gossypium hirsutum OX=3635 GN=LOC107900533	LOC107900533	25.792	3.227	10.2	3	4	2	1.16	0.885	1.157	0.883	1.046	0.831	0.773	0.0029631
A0A1U8J0A8	Autophagy-related protein 3 OS=Gossypium hirsutum OX=3635 GN=LOC107900819	LOC107900819	35.434	12.879	12.5	4	5	2	1.106	0.983	1.022	0.966	1.052	0.861	0.884	0.058404
A0A1U8J0D3	Methionine S-methyltransferase OS=Gossypium hirsutum OX=3635 GN=LOC107902056	LOC107902056	120.27	17.12	13.5	14	15	4	0.985	1.036	1.047	1.061	0.947	0.901	1.006	0.94064
A0A1U8J0D9	pre-mRNA-splicing factor SPF27 homolog isoform X2 OS=Gossypium hirsutum OX=3635 GN=LOC107902058	LOC107902058	29.225	8.9685	20.6	6	6	6	1.073	0.99	1.078	0.98	1.044	0.834	0.878	0.077242
A0A1U8J0F1	cytochrome c oxidase subunit 5b-1, mitochondrial-like OS=Gossypium hirsutum OX=3635 GN=LOC107902063	LOC107902063	18.518	5.5899	27.4	6	9	3	0.922	1.227	0.928	1.049	0.941	0.972	1.164	0.166416
A0A1U8J0I8	L-ascorbate oxidase homolog OS=Gossypium hirsutum OX=3635 GN=LOC107900589	LOC107900589	61.101	100.02	19.9	9	18	2	0.779	1.377	0.787	1.209	0.631	1.337	1.786	0.0020753
A0A1U8J0J2	Disease resistance protein OS=Theobroma cacao OX=3641 GN=TCM_017362 PE=4 SV=1	LOC107902149	56.226	3.346	12.6	5	6	1	0.962	1.056	0.912	1.01	1.072	1.014	1.045	0.40136
A0A1U8J0J8	40S ribosomal protein SA OS=Gossypium hirsutum OX=3635 GN=LOC107900596	LOC107900596	33.688	10.408	39.7	12	45	2	0.975	1.076	0.875	1.023	0.965	1.131	1.147	0.037622
A0A1U8J0N1	transcription initiation factor TFIID subunit 6-like OS=Gossypium hirsutum OX=3635 GN=LOC107902202	LOC107902202	58.479	3.0222	3.6	2	2	1	1.102	0.933	1.045	0.922	1.047	0.942	0.876	0.0020003
A0A1U8J0P9	Phosphomannomutase OS=Gossypium hirsutum OX=3635 GN=LOC107900900	LOC107900900	28.095	1.3008	31.6	8	13	1	0.942	1.022	1.06	0.937	1.002	1.049	1.001	0.97922
A0A1U8J0Q4	Transmembrane protein OS=Arabidopsis thaliana OX=3702 GN=At4g00585 PE=2 SV=1	LOC107900903	9.7011	18.295	45.9	2	3	2	0.784	1.108	0.845	0.986	0.972	1.117	1.235	0.046418
A0A1U8J0R0	C1-like protein OS=Corchorus olitorius OX=93759 GN=COLO4_13572 PE=4 SV=1	LOC107902238	43.196	0.94819	2.3	1	1	1	1.031	1.028	0.993	0.982	0.961	1.022	1.016	0.55934
A0A1U8J0S4	isoflavone reductase homolog OS=Gossypium hirsutum OX=3635 GN=LOC107900659	LOC107900659	34.865	18.938	36.5	11	23	2	0.359	1.555	0.418	1.648	0.347	1.94	4.576	6.2293e-05
A0A1U8J0V9	acetyl-CoA carboxylase 1-like isoform X1 OS=Gossypium hirsutum OX=3635 GN=LOC107900939	LOC107900939	252.5	75.124	19.2	38	57	15	1.128	0.731	1.184	0.747	1.281	0.883	0.657	0.0038615
A0A1U8J0X1	upstream activation factor subunit UAF30-like OS=Gossypium hirsutum OX=3635 GN=LOC107900687	LOC107900687	12.975	2.4681	38.7	5	9	1	1.207	0.733	1.338	0.774	1.211	0.643	0.572	0.00097769
A0A1U8J123	AT3g12650/T2E22_103 OS=Arabidopsis thaliana OX=3702 GN=T2E22.4 PE=2 SV=1	LOC107900733	30.157	8.317	9.4	3	5	1	1.033	1.024	1.13	0.912	0.978	0.912	0.907	0.162583
A0A1U8J142	nuclear transcription factor Y subunit A-4-like OS=Gossypium hirsutum OX=3635 GN=LOC107900751	LOC107900751	31.168	2.7768	4.6	1	1	1
A0A1U8J145	E3 ubiquitin-protein ligase AIP2 OS=Gossypium hirsutum OX=3635 GN=LOC107901000	LOC107901000	34.82	2.6955	7	2	2	2	0.972	0.999	0.845	1.096	1.041	1.087	1.113	0.181061
A0A1U8J163	dephospho-CoA kinase-like OS=Gossypium hirsutum OX=3635 GN=LOC107902388	LOC107902388	25.912	15.988	27	5	6	2	1.023	0.987	0.982	0.962	1.013	1.048	0.993	0.80402
A0A1U8J166	Reticulon-like protein OS=Gossypium hirsutum OX=3635 GN=LOC107901017	LOC107901017	62.008	6.5025	11.2	7	7	1	0.823	1.283	0.747	1.14	0.783	1.33	1.595	0.00101904
A0A1U8J176	cytochrome c oxidase subunit 6b-1-like isoform X1 OS=Gossypium hirsutum OX=3635 GN=LOC107900776	LOC107900776	20.353	53.228	42.9	7	12	2	0.962	1.07	0.939	1.035	1.027	1.082	1.088	0.04624
A0A1U8J178	phosphoinositide phosphatase SAC3-like isoform X2 OS=Gossypium hirsutum OX=3635 GN=LOC107901025	LOC107901025	93.925	1.4837	3.4	3	3	1	1.111	0.882	1.044	0.902	1.079	0.969	0.851	0.0085828
A0A1U8J185	protein transport protein SEC31 homolog B-like isoform X1 OS=Gossypium hirsutum OX=3635 GN=LOC107900783	LOC107900783	120.08	1.7026	25.6	27	47	2	1.099	0.991	0.978	1.007	0.927	1.014	1.003	0.9282
A0A1U8J195	40S ribosomal protein S3a OS=Gossypium hirsutum OX=3635 GN=LOC107902451	LOC107902451	29.755	29.137	60.3	14	49	1	0.943	1.066	0.918	1.062	0.956	1.096	1.144	0.00096019
A0A1U8J1B6	protein OBERON 1-like OS=Gossypium hirsutum OX=3635 GN=LOC107902477	LOC107902477	53.768	0.93316	3.1	2	2	2
A0A1U8J1B8	Succinyl-diaminopimelate desuccinylase OS=Gossypium arboreum OX=29729 GN=F383_25441 PE=4 SV=1	LOC107901048	21.084	3.578	9	1	1	1	0.965	1.086	0.974	1.024	0.907	1.078	1.12	0.0173046
A0A1U8J1C1	leucine-rich repeat extensin-like protein 4 OS=Gossypium hirsutum OX=3635 GN=LOC107902487	LOC107902487	71.394	37.149	8	5	7	5	0.98	0.913	1.06	0.952	0.961	1.117	0.994	0.89854
A0A1U8J1D6	thiol protease aleurain-like OS=Gossypium hirsutum OX=3635 GN=LOC107901061	LOC107901061	38.72	41.088	18.9	6	13	5	0.892	1.227	0.927	1.162	0.722	1.122	1.382	0.0159997
A0A1U8J1I8	At3g60810 OS=Arabidopsis thaliana OX=3702 GN=T4C21_220 PE=2 SV=1	LOC107900854	23.159	14.033	10.3	2	3	2	1.108	0.874	1.185	0.915	1.1	0.782	0.758	0.0059448
A0A1U8J1J1	N-lysine methyltransferase SEE1 OS=Gossypium arboreum OX=29729 GN=F383_16527 PE=4 SV=1	LOC107900857	30.824	13.536	26.7	8	12	3	1.042	1.039	1.286	0.75	1.032	0.809	0.773	0.09814
A0A1U8J1J6	4-hydroxy-tetrahydrodipicolinate synthase, chloroplastic-like OS=Gossypium hirsutum OX=3635 GN=LOC107900865	LOC107900865	40.321	34.676	16.4	4	7	2	0.971	1.004	1.086	1.026	0.954	0.965	0.995	0.93278
A0A1U8J1L8	WD-40 repeat-containing protein MSI4-like OS=Gossypium hirsutum OX=3635 GN=LOC107901112	LOC107901112	54.749	93.399	38.1	15	26	3	1.355	0.761	1.448	0.532	1.199	0.58	0.468	0.0031762
A0A1U8J1P7	histone acetyltransferase type B catalytic subunit-like OS=Gossypium hirsutum OX=3635 GN=LOC107901138	LOC107901138	53.039	5.7141	19.9	8	11	1	1.103	0.876	1.143	0.884	1.084	0.879	0.792	0.00012258
A0A1U8J1P8	probable serine/threonine-protein kinase At1g54610 OS=Gossypium hirsutum OX=3635 GN=LOC107902629	LOC107902629	78	5.3209	5.1	4	4	2	1.347	0.634	1.299	0.623	1.387	0.589	0.458	1.57881e-05
A0A1U8J1Q1	endoplasmic reticulum-Golgi intermediate compartment protein 3-like OS=Gossypium hirsutum OX=3635 GN=LOC107900893	LOC107900893	43.27	49.053	24.1	9	12	6	0.959	1.058	0.903	1.121	0.933	1.064	1.16	0.0042049
A0A1U8J1S2	probable LRR receptor-like serine/threonine-protein kinase At4g08850 OS=Gossypium hirsutum OX=3635 GN=LOC107902670	LOC107902670	105.48	-2	1.2	1	1	1	0.996	0.956	0.995	1.007	1.024	1.037	0.995	0.84132
A0A1U8J1S8	nudix hydrolase 1-like OS=Gossypium hirsutum OX=3635 GN=LOC107901162	LOC107901162	16.148	4.8473	14.6	2	2	2	1.137	0.885	1.109	0.788	1.149	0.896	0.757	0.0026774
A0A1U8J1T9	dolichyl-diphosphooligosaccharide--protein glycosyltransferase subunit STT3A OS=Gossypium hirsutum OX=3635 GN=LOC107901178	LOC107901178	87.491	24.111	15.6	9	18	1	0.905	1.088	0.894	1.13	0.89	1.149	1.252	0.000182489
A0A1U8J1U2	receptor-like protein 51 OS=Gossypium hirsutum OX=3635 GN=LOC107902681	LOC107902681	32.761	3.2193	3.9	1	1	1
A0A1U8J1V2	eukaryotic translation initiation factor 1A OS=Gossypium hirsutum OX=3635 GN=LOC107900933	LOC107900933	16.391	2.5232	41.4	6	15	1
A0A1U8J1V3	vinorine synthase-like OS=Gossypium hirsutum OX=3635 GN=LOC107902678	LOC107902678	50.697	3.9577	4.8	2	3	2
A0A1U8J1V5	transcriptional corepressor LEUNIG-like isoform X4 OS=Gossypium hirsutum OX=3635 GN=LOC107901203	LOC107901203	93.508	14.332	7.6	5	5	4	1.481	0.881	0.995	0.707	1.155	0.726	0.637	0.03082
A0A1U8J1Z8	nucleolin 1-like OS=Gossypium hirsutum OX=3635 GN=LOC107900963	LOC107900963	66.234	2.5291	4.7	3	3	3	1.151	0.84	1.106	0.834	1.195	0.831	0.726	0.004936
A0A1U8J222	AAA-ATPase At2g18193-like isoform X2 OS=Gossypium hirsutum OX=3635 GN=LOC107901240	LOC107901240	60.445	25.507	9.8	4	4	1	0.697	1.304	0.62	1.469	0.575	1.499	2.258	0.00032273
A0A1U8J260	sucrose synthase-like OS=Gossypium hirsutum OX=3635 GN=LOC107902827	LOC107902827	32.648	21.497	48.6	17	59	1	0.824	1.285	1.119	0.93	0.863	0.942	1.125	0.46196
A0A1U8J263	probable glutathione S-transferase OS=Gossypium hirsutum OX=3635 GN=LOC107901002	LOC107901002	25.366	1.8475	35	9	13	1	0.967	0.973	0.908	1.079	0.988	1.121	1.108	0.108178
A0A1U8J264	far upstream element-binding protein 1-like OS=Gossypium hirsutum OX=3635 GN=LOC107902822	LOC107902822	73.692	13.254	21	13	20	2	1.113	0.931	1.173	0.854	1.119	0.766	0.749	0.0077246
A0A1U8J276	gamma carbonic anhydrase 1, mitochondrial-like isoform X2 OS=Gossypium hirsutum OX=3635 GN=LOC107901293	LOC107901293	29.642	28.86	33.9	9	19	1	1	1.007	0.99	1.044	0.945	1.036	1.052	0.069623
A0A1U8J288	BnaC02g23270D protein OS=Brassica napus OX=3708 GN=BnaC02g23270D PE=4 SV=1	LOC107902850	11.793	1.5741	10.2	1	1	1	1.129	0.946	1.044	0.98	1.022	0.866	0.874	0.046901
A0A1U8J2C6	2,3-bisphosphoglycerate-independent phosphoglycerate mutase OS=Gossypium hirsutum OX=3635 GN=LOC107902893	LOC107902893	60.984	153.06	50.2	28	88	3	0.844	1.229	0.833	1.044	1.017	1.091	1.249	0.050245
A0A1U8J2C8	putative clathrin assembly protein At5g35200 OS=Gossypium hirsutum OX=3635 GN=LOC107901330	LOC107901330	60.942	67.689	33.6	16	20	4	0.988	1.079	0.987	1.033	0.906	1.074	1.106	0.033604
A0A1U8J2D3	Purple acid phosphatase OS=Gossypium hirsutum OX=3635 GN=LOC107901334	LOC107901334	55.337	108.35	24.5	11	20	2	1.037	0.954	1.045	1.02	0.956	0.941	0.96	0.33784
A0A1U8J2E9	triphosphate tunel metalloenzyme 3-like OS=Gossypium hirsutum OX=3635 GN=LOC107901344	LOC107901344	22.857	5.8592	24.4	4	6	4	1.051	0.98	1.049	0.939	1.103	0.871	0.871	0.021975
A0A1U8J2F9	tubulin--tyrosine ligase-like protein 12 OS=Gossypium hirsutum OX=3635 GN=LOC107901062	LOC107901062	95.111	12.735	6.6	5	5	1
A0A1U8J2H0	MOB kinase activator-like 1A isoform X2 OS=Gossypium hirsutum OX=3635 GN=LOC107901070	LOC107901070	22.603	5.1296	15.7	3	3	3	1.121	1.019	1.096	0.827	1.083	0.828	0.81	0.09182
A0A1U8J2J6	Eukaryotic translation initiation factor 2A OS=Gossypium hirsutum OX=3635 GN=LOC107902972	LOC107902972	56.691	93.521	49.8	20	27	6	0.885	1.157	0.867	1.109	0.834	1.221	1.348	0.00081597
A0A1U8J2L1	WD repeat-containing protein VIP3-like OS=Gossypium hirsutum OX=3635 GN=LOC107901093	LOC107901093	34.288	4.7333	13.4	4	6	2	0.952	1.002	0.974	1.088	0.993	1.013	1.063	0.101044
A0A1U8J2N7	Sialidase OS=Gossypium arboreum OX=29729 GN=F383_01562 PE=4 SV=1	LOC107901390	36.084	6.1075	8.4	3	3	3	0.899	1.012	1	1.095	0.964	1.057	1.105	0.060222
A0A1U8J2P0	Beta-galactosidase OS=Gossypium hirsutum OX=3635 GN=LOC107901113	LOC107901113	93.739	7.1945	11.6	9	10	5	1.22	0.786	1.147	0.763	1.128	0.857	0.688	0.0008985
A0A1U8J2Q4	Putative mediator of RNA polymerase II transcription subunit 28 OS=Gossypium arboreum OX=29729 GN=F383_14869 PE=4 SV=1	LOC107901125	56.34	-2	2.8	1	1	1	0.871	1.142	0.858	1.219	0.818	1.165	1.384	0.00027685
A0A1U8J2R9	asparagine--tRNA ligase, cytoplasmic 1-like OS=Gossypium hirsutum OX=3635 GN=LOC107901140	LOC107901140	63.734	87.859	27.9	15	32	4	0.96	1.034	0.925	1.019	0.985	1.114	1.103	0.041421
A0A1U8J2S4	vacuolar protein sorting-associated protein 32 homolog 2 OS=Gossypium hirsutum OX=3635 GN=LOC107901143	LOC107901143	24.23	120.46	44	10	22	0
A0A1U8J2T0	C-terminal LisH motif isoform 1 OS=Theobroma cacao OX=3641 GN=TCM_000590 PE=4 SV=1	LOC107901419	77.249	6.9558	6.8	4	4	4	1.078	0.898	0.979	0.988	1.009	1.06	0.961	0.49958
A0A1U8J2T9	Protein translocase subunit SecA OS=Gossypium arboreum OX=29729 GN=F383_34178 PE=4 SV=1	LOC107903117	13.241	3.5735	34.9	3	3	1	1.175	0.587	1.517	0.574	1.447	0.553	0.414	0.00040133
A0A1U8J306	ABC transporter G family member 32-like OS=Gossypium hirsutum OX=3635 GN=LOC107901204	LOC107901204	162.08	3.5916	4.6	7	9	2	1.395	0.662	1.28	0.659	1.291	0.601	0.485	6.2252e-05
A0A1U8J307	Hexosyltransferase OS=Gossypium hirsutum OX=3635 GN=LOC107901488	LOC107901488	41.493	6.0853	5.9	2	2	2	0.961	1.067	0.95	0.962	0.983	1.109	1.084	0.143378
A0A1U8J314	60S ribosomal protein L5-like isoform X2 OS=Gossypium hirsutum OX=3635 GN=LOC107903176	LOC107903176	25.478	42.076	47.1	10	18	5	0.951	1.077	0.947	1.073	0.942	1.041	1.124	0.00046454
A0A1U8J324	ATP-dependent 6-phosphofructokinase OS=Gossypium hirsutum OX=3635 GN=LOC107901506	LOC107901506	53.63	5.8935	35.3	17	29	2	0.907	0.94	1.075	1.08	1.022	0.89	0.969	0.69166
A0A1U8J344	GDSL esterase/lipase 1-like OS=Gossypium hirsutum OX=3635 GN=LOC107903210	LOC107903210	40.504	9.2735	11.8	4	4	4	0.294	1.79	0.311	1.905	0.345	1.633	5.608	1.59204e-05
A0A1U8J348	mitochondrial import inner membrane translocase subunit TIM17-2 OS=Gossypium hirsutum OX=3635 GN=LOC107901515	LOC107901515	17.053	13.804	22.4	3	3	3	0.896	1.154	0.942	1.121	0.829	1.169	1.291	0.0028
A0A1U8J380	peroxisomal fatty acid beta-oxidation multifunctional protein AIM1-like OS=Gossypium hirsutum OX=3635 GN=LOC107901248	LOC107901248	78.539	3.2754	4.4	4	5	3	1.006	1.108	0.974	0.898	0.986	1.05	1.03	0.72208
A0A1U8J3D0	Glutamyl-tRNA(Gln) amidotransferase subunit A, chloroplastic/mitochondrial OS=Gossypium hirsutum OX=3635 GN=LOC107903351	LOC107903351	57.803	21.306	9.9	4	4	4	1.009	0.938	1.067	0.916	1.057	1.01	0.914	0.057081
A0A1U8J3D3	calcium-dependent protein kinase 9-like OS=Gossypium hirsutum OX=3635 GN=LOC107903322	LOC107903322	58.823	44.905	24	11	13	6	1.198	0.807	1.124	0.848	1.131	0.849	0.725	0.00025894
A0A1U8J3D8	coiled-coil domain-containing protein 94 homolog OS=Gossypium hirsutum OX=3635 GN=LOC107903323	LOC107903323	36.342	33.238	20.3	6	7	6	1.005	0.963	0.984	1.047	0.998	0.968	0.997	0.89994
A0A1U8J3E1	RNA helicase OS=Gossypium hirsutum OX=3635 GN=LOC107903330	LOC107903330	85.054	1.4942	1.5	1	1	1
A0A1U8J3E4	cleavage stimulation factor subunit 77-like isoform X2 OS=Gossypium hirsutum OX=3635 GN=LOC107903363	LOC107903363	72.207	2.9636	2.6	2	2	2
A0A1U8J3F4	nuclear pore complex protein NUP1 OS=Gossypium hirsutum OX=3635 GN=LOC107901305	LOC107901305	80.212	27.895	9.6	7	8	7	0.968	0.961	1.064	0.93	1.055	0.952	0.921	0.062044
A0A1U8J3F6	Transcription activator gutR OS=Gossypium arboreum OX=29729 GN=F383_13022 PE=4 SV=1	LOC107903345	60.254	1.5151	4	3	3	2	0.997	1.033	0.957	1.123	0.855	1.072	1.149	0.05368
A0A1U8J3G1	chaperone protein ClpB4, mitochondrial-like isoform X2 OS=Gossypium hirsutum OX=3635 GN=LOC107901621	LOC107901621	108.9	97.929	26.9	22	30	4	1.042	0.897	1.026	0.923	1.061	0.923	0.877	0.00063761
A0A1U8J3G6	Coatomer subunit beta OS=Gossypium hirsutum OX=3635 GN=LOC107901630	LOC107901630	105.86	8.2901	36.9	31	59	2	0.955	1.027	0.92	0.931	1.023	1.179	1.082	0.3723
A0A1U8J3H0	UDP-Glycosyltransferase superfamily protein OS=Theobroma cacao OX=3641 GN=TCM_044311 PE=4 SV=1	LOC107903352	54.513	1.5293	1.7	1	1	1
A0A1U8J3J6	protein RRC1-like isoform X2 OS=Gossypium hirsutum OX=3635 GN=LOC107901654	LOC107901654	98.171	3.9089	5	4	4	2	0.746	1.053	0.802	1.412	0.729	1.366	1.682	0.0061751
A0A1U8J3J9	WEB family protein At5g55860-like OS=Gossypium hirsutum OX=3635 GN=LOC107903387	LOC107903387	71.934	3.1426	10.5	7	9	1	1.018	0.841	1.067	0.969	1.152	0.936	0.848	0.041743
A0A1U8J3L2	LOW QUALITY PROTEIN: proteasome activator subunit 4-like OS=Gossypium hirsutum OX=3635 GN=LOC107903402	LOC107903402	203.46	51.615	10.2	18	21	2	0.974	0.999	0.939	1.011	0.959	1.154	1.102	0.116295
A0A1U8J3M8	polyphenol oxidase, chloroplastic-like OS=Gossypium hirsutum OX=3635 GN=LOC107901676	LOC107901676	67.252	122.37	26.9	13	26	13	0.784	1.227	0.785	1.215	0.797	1.322	1.591	6.4577e-05
A0A1U8J3N1	PLASMODESMATA CALLOSE-BINDING PROTEIN 3-like OS=Gossypium hirsutum OX=3635 GN=LOC107903421	LOC107903421	19.251	27.81	27.1	4	10	1	0.985	1.022	1.142	0.879	1.034	0.926	0.894	0.146039
A0A1U8J3N7	Uridine kinase OS=Gossypium hirsutum OX=3635 GN=LOC107903412	LOC107903412	54.168	3.1488	22.6	10	15	3
A0A1U8J3Q5	scarecrow-like protein 5 OS=Gossypium hirsutum OX=3635 GN=LOC107903436	LOC107903436	56.638	69.367	14.6	6	8	1	1.166	0.736	1.262	0.784	1.159	0.827	0.654	0.00061725
A0A1U8J3Q9	pre-mRNA-splicing factor CWC25 homolog OS=Gossypium hirsutum OX=3635 GN=LOC107903419	LOC107903419	47.627	9.1105	8.3	3	3	3	1.022	0.95	1.077	1.071	1.061	0.804	0.894	0.23332
A0A1U8J3R4	DNA topoisomerase 1-like OS=Gossypium hirsutum OX=3635 GN=LOC107903422	LOC107903422	101.14	2.5594	5.1	4	5	1	1.221	0.989	1.135	0.743	0.998	0.885	0.78	0.069245
A0A1U8J3R6	Ingression 1 OS=Gossypium arboreum OX=29729 GN=F383_04975 PE=4 SV=1	LOC107903433	39.974	52.376	28.7	10	14	2
A0A1U8J3S6	psbP domain-containing protein 5, chloroplastic isoform X3 OS=Gossypium hirsutum OX=3635 GN=LOC107901380	LOC107901380	28.487	13.084	17.5	4	5	4	1.08	0.885	1.116	0.966	1.038	0.932	0.861	0.0102962
A0A1U8J3T8	ubiquitin carboxyl-terminal hydrolase 8-like OS=Gossypium hirsutum OX=3635 GN=LOC107901697	LOC107901697	100.38	6.4169	4.7	3	4	3	0.832	1.053	0.947	1.11	0.849	1.071	1.231	0.0083627
A0A1U8J3U9	cold shock protein 2-like OS=Gossypium hirsutum OX=3635 GN=LOC107901396	LOC107901396	18.189	1.9692	5.2	1	1	1	1.174	0.859	1.113	0.88	1.119	0.815	0.75	0.00052216
A0A1U8J3V8	Small ubiquitin-related modifier OS=Gossypium hirsutum OX=3635 GN=LOC107903470	LOC107903470	11.122	59.675	36.7	5	14	1	1.09	0.812	1.2	0.81	1.316	0.703	0.645	0.0037423
A0A1U8J3W3	GrpE protein homolog OS=Gossypium hirsutum OX=3635 GN=LOC107903476	LOC107903476	34.298	1.774	26.8	6	12	1
A0A1U8J3W4	Pyridoxal phosphate homeostasis protein OS=Gossypium hirsutum OX=3635 GN=LOC107903462	LOC107903462	27.007	9.9369	13.1	2	3	2	1.001	0.903	1.024	1.039	1.028	1.011	0.967	0.46774
A0A1U8J3X0	aspartate carbamoyltransferase 1, chloroplastic-like OS=Gossypium hirsutum OX=3635 GN=LOC107903467	LOC107903467	44.434	5.0549	28.4	11	15	2	1.049	1.016	1.12	0.95	0.88	0.987	0.969	0.73306
A0A1U8J3Z5	2-alkenal reductase (NADP(+)-dependent)-like OS=Gossypium hirsutum OX=3635 GN=LOC107903483	LOC107903483	38.668	64.29	34.6	13	33	2	1.024	0.894	1.012	0.958	1.138	0.969	0.889	0.05988
A0A1U8J404	UDP-arabinopyranose mutase 1-like OS=Gossypium hirsutum OX=3635 GN=LOC107901434	LOC107901434	41.224	54.905	52.1	18	41	4	0.212	2.123	0.269	1.326	0.21	2.196	8.169	0.00033602
A0A1U8J411	Double-strand break repair protein OS=Gossypium hirsutum OX=3635 GN=LOC107903527	LOC107903527	80.751	6.4314	5.3	3	3	3	1.069	1.006	1.111	0.862	1.016	0.923	0.873	0.05702
A0A1U8J415	F14O23.11 protein OS=Arabidopsis thaliana OX=3702 GN=EML PE=2 SV=1	LOC107901755	19.088	13.203	25.6	4	6	4	0.951	1.075	1.01	1.022	1.009	0.947	1.025	0.60238
A0A1U8J429	alanine--glyoxylate aminotransferase 2 homolog 3, mitochondrial-like isoform X2 OS=Gossypium hirsutum OX=3635 GN=LOC107903538	LOC107903538	42.343	2.7124	10.2	3	4	2	0.983	0.971	1.163	1.007	0.913	0.96	0.96	0.65354
A0A1U8J437	2-C-methyl-D-erythritol 4-phosphate cytidylyltransferase, chloroplastic isoform X5 OS=Gossypium hirsutum OX=3635 GN=LOC107901766	LOC107901766	33.497	4.384	5.9	2	2	2	1.1	0.912	1.028	0.884	1.104	0.961	0.853	0.0091217
A0A1U8J462	beta-fructofuranosidase, insoluble isoenzyme CWINV1-like isoform X3 OS=Gossypium hirsutum OX=3635 GN=LOC107901479	LOC107901479	65.249	2.8319	12.1	6	14	1	1.523	0.584	1.479	0.489	1.329	0.432	0.347	0.00039528
A0A1U8J468	uridine 5'-monophosphate synthase-like OS=Gossypium hirsutum OX=3635 GN=LOC107903544	LOC107903544	51.617	165.1	45	19	59	14	0.84	1.22	0.843	1.17	0.835	1.17	1.414	1.84615e-05
A0A1U8J484	beta-glucosidase BoGH3B-like OS=Gossypium hirsutum OX=3635 GN=LOC107901787	LOC107901787	66.873	187.69	35.6	16	46	1	0.885	1.3	0.86	1.112	0.728	1.292	1.498	0.0069984
A0A1U8J495	WEB family protein At2g38370-like OS=Gossypium hirsutum OX=3635 GN=LOC107903558	LOC107903558	61.505	2.1361	13.2	8	8	1
A0A1U8J496	50S ribosomal protein L21, mitochondrial-like OS=Gossypium hirsutum OX=3635 GN=LOC107901818	LOC107901818	28.782	1.9929	7	2	2	2
A0A1U8J4D2	Malic enzyme OS=Gossypium hirsutum OX=3635 GN=LOC107901517	LOC107901517	63.443	4.6987	45.8	23	38	1
A0A1U8J4F0	probable protein phosphatase 2C 39 OS=Gossypium hirsutum OX=3635 GN=LOC107903637	LOC107903637	31.419	12.68	49.1	11	25	1	1.064	0.934	1.032	0.926	1.003	1.045	0.937	0.196096
A0A1U8J4F2	E3 ubiquitin protein ligase RIE1-like OS=Gossypium hirsutum OX=3635 GN=LOC107903626	LOC107903626	38.672	5.0313	6.9	2	3	2	1.114	0.859	1.132	0.876	1.122	0.861	0.771	2.3132e-06
A0A1U8J4G2	microtubule-associated protein 70-2-like OS=Gossypium hirsutum OX=3635 GN=LOC107903631	LOC107903631	69.303	54.254	26.9	16	26	1
A0A1U8J4G4	H/ACA ribonucleoprotein complex subunit 3-like protein OS=Gossypium hirsutum OX=3635 GN=LOC107901875	LOC107901875	7.5195	3.6617	18.8	1	1	1
A0A1U8J4I5	Eukaryotic translation initiation factor 3 subunit L OS=Gossypium hirsutum OX=3635 GN=LOC107901567	LOC107901567	61.358	28.439	24	12	16	2	0.964	0.983	1.05	1.091	0.967	0.955	1.016	0.77392
A0A1U8J4I8	protein argonaute 2-like OS=Gossypium hirsutum OX=3635 GN=LOC107901899	LOC107901899	115.62	19.264	16	16	25	5	1.017	0.998	0.998	0.954	1.042	1.019	0.972	0.28142
A0A1U8J4P3	Malate dehydrogenase OS=Gossypium hirsutum OX=3635 GN=LOC107903665	LOC107903665	35.371	169.69	44.1	14	50	2	0.859	1.419	0.821	0.877	1.014	1.071	1.25	0.24808
A0A1U8J4P9	adenosine deaminase-like protein OS=Gossypium hirsutum OX=3635 GN=LOC107901944	LOC107901944	40.331	8.8546	11.2	4	4	1	1.078	1.002	1.026	0.959	1.03	0.9	0.913	0.058402
A0A1U8J4Q1	Aspartate aminotransferase OS=Gossypium hirsutum OX=3635 GN=LOC107901617	LOC107901617	50.312	19.803	35.2	15	32	2	0.914	1.085	0.963	1.015	1.008	1.037	1.087	0.070943
A0A1U8J4R6	probable sarcosine oxidase OS=Gossypium hirsutum OX=3635 GN=LOC107901637	LOC107901637	45.987	1.0115	9	3	4	1	1.123	0.889	1.17	0.696	1.381	0.665	0.612	0.0108828
A0A1U8J4T2	Protein RER1 OS=Gossypium hirsutum OX=3635 GN=LOC107901651	LOC107901651	23.646	2.5243	9.4	2	2	1
A0A1U8J4T8	Transcription factor RF2a OS=Gossypium arboreum OX=29729 GN=F383_17341 PE=4 SV=1	LOC107903717	61.397	2.7108	5.3	3	3	0
A0A1U8J4X7	protein DJ-1 homolog B-like OS=Gossypium hirsutum OX=3635 GN=LOC107903724	LOC107903724	46.285	73.179	34.3	12	35	9	1.043	0.951	1.031	1.008	1.032	0.913	0.925	0.111881
A0A1U8J4X8	GAG1At protein OS=Theobroma cacao OX=3641 GN=TCM_027469 PE=4 SV=1	LOC107901690	8.6588	4.6656	14.1	1	1	1	1.038	1.002	1.014	0.945	0.932	1.088	1.017	0.77066
A0A1U8J502	fruit protein pKIWI502-like isoform X1 OS=Gossypium hirsutum OX=3635 GN=LOC107903742	LOC107903742	29.692	11.676	15.8	3	4	3	1.002	0.941	1.045	1.048	0.974	0.998	0.989	0.76594
A0A1U8J516	clathrin interactor EPSIN 3-like isoform X4 OS=Gossypium hirsutum OX=3635 GN=LOC107903761	LOC107903761	118.86	-2	7.1	8	10	1	0.873	0.698	0.993	1.344	0.909	1.223	1.177	0.5796
A0A1U8J523	phosphoglucan, water dikinase, chloroplastic-like OS=Gossypium hirsutum OX=3635 GN=LOC107903789	LOC107903789	130.47	63.899	14.7	14	16	4	0.971	0.971	1.001	1.017	0.967	0.992	1.014	0.46872
A0A1U8J525	trafficking protein particle complex subunit 13-like isoform X1 OS=Gossypium hirsutum OX=3635 GN=LOC107901718	LOC107901718	49.441	59.76	22.6	9	11	4	0.972	1.081	1.02	0.927	0.93	1.095	1.062	0.38688
A0A1U8J549	pyrophosphate-energized membrane proton pump 3-like OS=Gossypium hirsutum OX=3635 GN=LOC107902036	LOC107902036	85.233	43.464	15.3	11	17	2	1.057	1.149	1.068	0.912	0.921	0.897	0.971	0.73624
A0A1U8J551	probable glutathione S-transferase OS=Gossypium hirsutum OX=3635 GN=LOC107903814	LOC107903814	25.696	39.885	44.3	14	29	5	0.982	0.987	0.935	1.061	0.97	1.072	1.081	0.061142
A0A1U8J554	Eukaryotic translation initiation factor 3 subunit H OS=Gossypium hirsutum OX=3635 GN=LOC107903821	LOC107903821	38.781	-2	12.2	4	7	1
A0A1U8J590	double-stranded RNA-binding protein 1-like isoform X2 OS=Gossypium hirsutum OX=3635 GN=LOC107903851	LOC107903851	49.682	8.4872	10.5	5	6	5	1.076	0.95	1.052	0.953	1.096	0.879	0.863	0.0069386
A0A1U8J594	15 kDa selenoprotein-like OS=Gossypium hirsutum OX=3635 GN=LOC107903826	LOC107903826	19.084	13.269	24.2	5	10	1	0.924	1.024	1.076	1.029	1.046	0.9	0.969	0.6566
A0A1U8J5A4	Obg-like ATPase 1 OS=Gossypium hirsutum OX=3635 GN=LOC107903835	LOC107903835	45.399	43.764	35.6	12	18	12	0.98	1.009	1.03	1.042	0.982	0.935	0.998	0.94244
A0A1U8J5B7	calmodulin-7 OS=Gossypium hirsutum OX=3635 GN=LOC107902047	LOC107902047	16.848	35.209	61.7	12	71	1	0.972	0.965	0.988	1.006	1.109	0.907	0.938	0.28374
A0A1U8J5B8	RNA polymerase II degradation factor 1-like OS=Gossypium hirsutum OX=3635 GN=LOC107950992 PE=4 SV=1	LOC107903879	75.534	8.5177	25.4	14	29	2	1.141	0.814	1.071	0.882	1.15	0.911	0.775	0.0032037
A0A1U8J5C1	lys-63-specific deubiquitinase BRCC36-like isoform X1 OS=Gossypium hirsutum OX=3635 GN=LOC107901767	LOC107901767	47.721	1.338	20.7	8	9	2	1.022	0.986	1.025	0.998	1.013	0.96	0.962	0.031981
A0A1U8J5D6	ultraviolet-B receptor UVR8-like isoform X2 OS=Gossypium hirsutum OX=3635 GN=LOC107903887	LOC107903887	36.648	4.4073	6.1	1	1	1	1.038	0.897	1.113	0.914	1.11	0.906	0.833	0.00148283
A0A1U8J5E6	chaperone protein dnaJ 15-like OS=Gossypium hirsutum OX=3635 GN=LOC107903873	LOC107903873	45.416	10.302	27.3	10	12	1	1.145	0.795	1.051	0.921	1.079	0.991	0.827	0.049404
A0A1U8J5E8	S-acyltransferase OS=Gossypium hirsutum OX=3635 GN=LOC107902132	LOC107902132	49.731	25.396	21.4	7	10	5	1.119	0.9	1.075	0.94	1.059	1.008	0.875	0.022215
A0A1U8J5F1	26S proteasome non-ATPase regulatory subunit 1 homolog OS=Gossypium hirsutum OX=3635 GN=LOC107903880	LOC107903880	110.46	46.446	17.5	17	28	5	0.96	0.934	1.007	0.994	0.998	1.086	1.017	0.76622
A0A1U8J5G2	protein RETICULATA-RELATED 3, chloroplastic-like OS=Gossypium hirsutum OX=3635 GN=LOC107903898	LOC107903898	36.567	182.55	24.3	8	17	4	0.937	1.076	0.894	1.079	0.947	1.096	1.17	0.00106295
A0A1U8J5G3	3-oxoacyl-[acyl-carrier-protein] reductase 4-like OS=Gossypium hirsutum OX=3635 GN=LOC107903899	LOC107903899	34.263	74.309	37.4	12	22	10	1.029	0.923	1.058	0.948	1.055	0.933	0.892	0.00063876
A0A1U8J5G7	T-complex protein 1 subunit epsilon OS=Gossypium hirsutum OX=3635 GN=LOC107903904	LOC107903904	59.188	3.4934	25.4	17	32	1	0.946	1.111	0.892	1.113	0.891	1.098	1.217	0.0006216
A0A1U8J5G8	Signal recognition particle subunit SRP72 OS=Gossypium hirsutum OX=3635 GN=LOC107903902	LOC107903902	73.177	170.86	45.1	22	30	7	0.969	1.048	0.967	1.033	0.986	1.068	1.078	0.0028421
A0A1U8J5H5	Eukaryotic translation initiation factor 3 subunit D OS=Gossypium hirsutum OX=3635 GN=LOC107901806	LOC107901806	65.703	100.19	23	10	17	0
A0A1U8J5H9	vesicle-fusing ATPase-like OS=Gossypium hirsutum OX=3635 GN=LOC107901816	LOC107901816	81.244	275.12	35.4	26	52	1	0.975	1.033	0.971	0.97	0.958	1.123	1.076	0.23468
A0A1U8J5J0	Trihelix transcription factor OS=Gossypium hirsutum OX=3635 GN=LOC107903901	LOC107903901	44.767	7.8816	6.1	1	1	1	0.878	1.003	0.994	1.022	0.949	1.193	1.141	0.119662
A0A1U8J5P9	putative receptor-like protein kinase At4g00960 OS=Gossypium hirsutum OX=3635 GN=LOC107903951	LOC107903951	44.985	4.5938	3	1	1	1
A0A1U8J5Q1	endoplasmic reticulum oxidoreductin-1-like OS=Gossypium hirsutum OX=3635 GN=LOC107901876	LOC107901876	53.186	7.4051	11	5	6	2	0.886	1.139	0.861	1.214	0.835	1.132	1.35	0.00044058
A0A1U8J5Q4	cullin-4-like OS=Gossypium hirsutum OX=3635 GN=LOC107901884	LOC107901884	93.59	6.5333	18	15	17	0
A0A1U8J5R6	calmodulin-binding transcription activator 4 isoform X4 OS=Gossypium hirsutum OX=3635 GN=LOC107903961	LOC107903961	96.816	1.6727	3.2	3	3	3
A0A1U8J5R8	putative clathrin assembly protein At2g01600 isoform X1 OS=Gossypium hirsutum OX=3635 GN=LOC107903952	LOC107903952	61.852	20.609	28.3	12	17	1	1.207	0.752	1.118	0.926	1.082	0.878	0.75	0.0145431
A0A1U8J5T7	endoplasmic reticulum metallopeptidase 1-like OS=Gossypium hirsutum OX=3635 GN=LOC107903967	LOC107903967	97.128	21.84	4.5	3	5	3	1.002	1.041	0.948	0.952	1.037	1.039	1.015	0.7267
A0A1U8J5V1	Retinal-binding OS=Gossypium arboreum OX=29729 GN=F383_05894 PE=4 SV=1	LOC107903976	51.052	24.704	20.4	8	11	4	0.905	1.05	1.035	1.001	0.986	1.044	1.058	0.24344
A0A1U8J5V6	probable glutathione S-transferase OS=Gossypium hirsutum OX=3635 GN=LOC107903988	LOC107903988	25.704	6.5702	45.5	13	28	4	1.331	0.682	1.243	0.573	1.415	0.585	0.461	0.00030427
A0A1U8J5W1	ethylene receptor-like isoform X2 OS=Gossypium hirsutum OX=3635 GN=LOC107903992	LOC107903992	70.228	1.032	1.1	1	2	1
A0A1U8J5X9	60S ribosomal protein L13a-4-like OS=Gossypium hirsutum OX=3635 GN=LOC107902325	LOC107902325	26.287	7.9979	34.8	9	19	3	1.019	0.826	1.098	0.978	0.99	1.09	0.931	0.42592
A0A1U8J5Z4	tubulin-folding cofactor D OS=Gossypium hirsutum OX=3635 GN=LOC107904016	LOC107904016	142.09	40.885	11.1	13	16	13	1.066	0.897	1.039	0.88	1.049	1.11	0.915	0.33546
A0A1U8J628	trifunctional UDP-glucose 4,6-dehydratase/UDP-4-keto-6-deoxy-D-glucose 3,5-epimerase/UDP-4-keto-L-rhamnose-reductase RHM1-like OS=Gossypium hirsutum OX=3635 GN=LOC107904028	LOC107904028	75.162	69.393	40.2	24	42	9	0.759	1.318	0.741	1.268	0.71	1.343	1.778	2.2009e-05
A0A1U8J629	AP-1 complex subunit gamma OS=Gossypium hirsutum OX=3635 GN=LOC107901981	LOC107901981	96.031	195.75	25.9	20	28	3	0.98	1.076	0.959	1.031	0.959	1.094	1.105	0.0065352
A0A1U8J665	probable methyltransferase PMT2 OS=Gossypium hirsutum OX=3635 GN=LOC107904069	LOC107904069	69.742	1.3273	48.2	25	40	0
A0A1U8J666	mitochondrial outer membrane protein porin of 36 kDa-like OS=Gossypium hirsutum OX=3635 GN=LOC107904061	LOC107904061	29.603	3.8535	32.6	10	18	3	1.001	1.049	1.012	0.917	1.023	1.008	0.98	0.63802
A0A1U8J670	probable acetyltransferase NATA1-like OS=Gossypium hirsutum OX=3635 GN=LOC107904074	LOC107904074	26.121	20.603	28.9	6	13	6	0.831	1.126	0.857	1.137	0.909	1.254	1.354	0.0022008
A0A1U8J683	Plasma membrane ATPase OS=Gossypium hirsutum OX=3635 GN=LOC107902016	LOC107902016	105.83	182.63	41	39	100	1	0.916	1.009	0.866	1.132	1.021	1.097	1.155	0.070161
A0A1U8J6B1	60S ribosomal protein L35-like OS=Gossypium hirsutum OX=3635 GN=LOC107904104	LOC107904104	14.301	12.104	32.5	6	8	2	1.047	1.054	1.015	1.036	0.934	0.924	1.006	0.92372
A0A1U8J6B7	protein YIPF1 homolog isoform X2 OS=Gossypium hirsutum OX=3635 GN=LOC107904132	LOC107904132	26.294	4.963	6.4	1	1	1
A0A1U8J6D3	dolichyl-phosphate beta-glucosyltransferase-like OS=Gossypium hirsutum OX=3635 GN=LOC107904125	LOC107904125	38.007	13.469	10.1	3	4	1	0.913	1.112	0.968	1.12	0.902	1.022	1.169	0.0130392
A0A1U8J6D9	protein NEDD1-like isoform X3 OS=Gossypium hirsutum OX=3635 GN=LOC107904133	LOC107904133	83.839	6.666	8.5	5	6	0
A0A1U8J6E7	annexin D4-like OS=Gossypium hirsutum OX=3635 GN=LOC107902545	LOC107902545	28.748	2.2248	9.1	2	3	1	1.064	1.074	1.017	1.007	0.859	0.999	1.048	0.50782
A0A1U8J6H7	survival of motor neuron-related-splicing factor 30-like OS=Gossypium hirsutum OX=3635 GN=LOC107902055	LOC107902055	32.225	12.962	17.9	4	4	4	1.128	0.829	1.155	0.919	1.138	0.784	0.74	0.02326
A0A1U8J6K2	RNA polymerase II subunit A C-terminal domain phosphatase SSU72-like OS=Gossypium hirsutum OX=3635 GN=LOC107904205	LOC107904205	22.406	6.1852	14	3	3	3
A0A1U8J6P5	peroxisome biogenesis protein 5-like OS=Gossypium hirsutum OX=3635 GN=LOC107902152	LOC107902152	78.05	1.0251	16	9	10	1	0.945	0.981	1.002	0.981	1.038	1.069	1.015	0.72052
A0A1U8J6S7	ATP-dependent zinc metalloprotease FTSH 11, chloroplastic/mitochondrial-like OS=Gossypium hirsutum OX=3635 GN=LOC107904258	LOC107904258	84.773	4.6447	5	3	4	3	1.042	0.887	1.036	0.986	1.017	1.035	0.94	0.23576
A0A1U8J6V4	U2 snRNP auxiliary factor large subunit OS=Gossypium hirsutum OX=3635 GN=LOC107904274	LOC107904274	37.831	14.356	17.5	5	5	2
A0A1U8J6X6	UMP-CMP kinase OS=Gossypium hirsutum OX=3635 GN=LOC107904290	LOC107904290	25.04	12.64	28.8	6	10	2	1.392	0.615	1.304	0.645	1.28	0.65	0.48	1.92113e-05
A0A1U8J6Z5	structural maintenance of chromosomes protein 3-like OS=Gossypium hirsutum OX=3635 GN=LOC107902776	LOC107902776	122.94	4.9233	4.9	5	5	5
A0A1U8J6Z9	Glycosyltransferase OS=Gossypium hirsutum OX=3635 GN=LOC107904309	LOC107904309	49.643	33.087	27.7	10	20	4	1.226	0.627	1.209	0.637	1.521	0.613	0.474	0.0101561
A0A1U8J776	nifU-like protein 4, mitochondrial OS=Gossypium hirsutum OX=3635 GN=LOC107904366	LOC107904366	30.326	14.952	28	6	7	2	0.938	1.098	1.003	1.083	0.995	0.898	1.049	0.55498
A0A1U8J798	dnaJ protein homolog OS=Gossypium hirsutum OX=3635 GN=LOC107904379	LOC107904379	46.439	160.59	34.4	19	62	2	1.093	0.911	1.052	0.979	0.999	0.937	0.899	0.033797
A0A1U8J7A1	prefoldin subunit 1 OS=Gossypium hirsutum OX=3635 GN=LOC107904383	LOC107904383	14.648	79.335	65.6	9	19	9	0.762	1.04	1.006	1.197	1.033	0.983	1.15	0.27056
A0A1U8J7B1	histone-lysine N-methyltransferase, H3 lysine-9 specific SUVH1-like OS=Gossypium hirsutum OX=3635 GN=LOC107904391	LOC107904391	72.891	8.9157	12.2	9	9	6	1.13	0.912	1.102	0.919	1.025	0.891	0.836	0.0043354
A0A1U8J7C3	protein farnesyltransferase/geranylgeranyltransferase type-1 subunit alpha OS=Gossypium hirsutum OX=3635 GN=LOC107904382	LOC107904382	38.566	23.064	11.5	3	5	3	0.962	0.907	0.932	1.084	0.989	1.136	1.085	0.33768
A0A1U8J7C5	Error-prone DNA polymerase 2 OS=Gossypium arboreum OX=29729 GN=F383_15636 PE=4 SV=1	LOC107904401	123.89	69.943	21.9	23	29	23	0.95	1.042	0.967	1.054	0.974	1.088	1.101	0.0029376
A0A1U8J7C7	ABC transporter I family member 6, chloroplastic OS=Gossypium hirsutum OX=3635 GN=LOC107904386	LOC107904386	35.318	8.3251	13	3	3	3	0.91	1.024	0.967	1.085	1.022	1.017	1.078	0.12498
A0A1U8J7H2	Xylose isomerase OS=Gossypium hirsutum OX=3635 GN=LOC107904426	LOC107904426	58.31	0.93784	46.5	21	51	1
A0A1U8J7H5	Xylose isomerase OS=Gossypium hirsutum OX=3635 GN=LOC107904426	LOC107904426	53.06	160.52	51.2	22	53	2	1.083	1.017	0.99	0.983	0.973	0.963	0.973	0.50738
A0A1U8J7I0	Peroxidase OS=Gossypium hirsutum OX=3635 GN=LOC107904435	LOC107904435	29.355	7.4078	23.5	5	7	3	0.566	0.964	0.859	1.419	0.753	1.559	1.81	0.037578
A0A1U8J7I5	translation initiation factor eIF-2B subunit beta-like isoform X2 OS=Gossypium hirsutum OX=3635 GN=LOC107904422	LOC107904422	41.037	25.385	11.3	4	5	4	1.047	1.024	0.968	0.935	0.993	1.036	0.996	0.9092
A0A1U8J7J4	Uroporphyrinogen decarboxylase OS=Gossypium hirsutum OX=3635 GN=LOC107904438	LOC107904438	42.211	11.776	8.9	2	3	2	1.076	0.991	1.07	0.858	1.092	0.843	0.831	0.068197
A0A1U8J7L0	serine/threonine-protein phosphatase 2A 65 kDa regulatory subunit A beta isoform-like OS=Gossypium hirsutum OX=3635 GN=LOC107902537	LOC107902537	64.448	151.4	37.3	17	37	0
A0A1U8J7M3	abscisic acid receptor PYL8-like OS=Gossypium hirsutum OX=3635 GN=LOC107904467	LOC107904467	22.084	14.614	18.1	4	5	2	1.141	0.914	1.027	0.959	1.016	0.936	0.882	0.034845
A0A1U8J7M4	probable polygalacturonase OS=Gossypium hirsutum OX=3635 GN=LOC107904469	LOC107904469	48.82	10.625	5.2	2	2	0
A0A1U8J7Q4	glutathione S-transferase T1-like isoform X1 OS=Gossypium hirsutum OX=3635 GN=LOC107904489	LOC107904489	26.06	2.1929	14.9	3	4	1
A0A1U8J7Q8	elicitor-responsive protein 3-like OS=Gossypium hirsutum OX=3635 GN=LOC107904492	LOC107904492	16.5	7.6402	14.2	2	4	2	0.893	1.063	0.956	1.147	0.892	1.135	1.22	0.0038186
A0A1U8J7S8	(Dimethylallyl)adenosine tRNA methylthiotransferase MiaB OS=Gossypium arboreum OX=29729 GN=F383_02253 PE=4 SV=1	LOC107904508	27.675	3.2506	7.4	2	2	2	1.059	1.073	1.004	0.995	1.028	0.841	0.941	0.42368
A0A1U8J7V5	Patatin OS=Gossypium hirsutum OX=3635 GN=LOC107902652	LOC107902652	44.501	1.1519	3.7	1	1	1
A0A1U8J7W3	transmembrane protein 120 homolog OS=Gossypium hirsutum OX=3635 GN=LOC107904539	LOC107904539	41.834	55.01	15	4	5	1	1.136	0.876	1.029	0.895	1.085	0.966	0.842	0.0140185
A0A1U8J7W6	60S ribosomal protein L9-like OS=Gossypium hirsutum OX=3635 GN=LOC107904536	LOC107904536	22.042	137.01	66.5	14	34	0
A0A1U8J7Z1	pentatricopeptide repeat-containing protein At3g49240-like OS=Gossypium hirsutum OX=3635 GN=LOC107904565	LOC107904565	71.652	4.0252	15	9	12	2
A0A1U8J814	probable NADH dehydrogenase [ubiquinone] 1 alpha subcomplex subunit 5, mitochondrial OS=Gossypium hirsutum OX=3635 GN=LOC107904587	LOC107904587	19.096	60.036	67.5	13	30	13	1.043	0.938	1.094	0.944	1.102	0.823	0.835	0.0191828
A0A1U8J817	Pectinesterase OS=Gossypium hirsutum OX=3635 GN=LOC107902709	LOC107902709	63.524	323.31	32	17	52	14	0.774	1.267	0.79	1.261	0.757	1.285	1.643	1.6602e-06
A0A1U8J818	putative disease resistance protein RGA1 OS=Gossypium hirsutum OX=3635 GN=LOC107903203	LOC107903203	186.85	-2	0.4	1	2	1	1.029	0.994	0.916	1.018	0.998	1.072	1.048	0.3146
A0A1U8J855	heat shock 70 kDa protein 6, chloroplastic OS=Gossypium hirsutum OX=3635 GN=LOC107903288	LOC107903288	75.44	310.06	44.2	33	71	0
A0A1U8J863	probable transcriptional regulator SLK2 isoform X2 OS=Gossypium hirsutum OX=3635 GN=LOC107904618	LOC107904618	80.968	2.3835	2.6	2	2	2
A0A1U8J897	protein EXORDIUM-like 3 OS=Gossypium hirsutum OX=3635 GN=LOC107904640	LOC107904640	42.426	3.9383	8.1	3	3	1
A0A1U8J899	probable mitochondrial intermediate peptidase, mitochondrial isoform X5 OS=Gossypium hirsutum OX=3635 GN=LOC107904641	LOC107904641	68.632	3.1149	2.5	1	1	1
A0A1U8J8B4	T-complex protein 1 subunit delta OS=Gossypium hirsutum OX=3635 GN=LOC107904652	LOC107904652	49.846	6.6529	46.7	21	44	0
A0A1U8J8B6	Obscurin-like protein 1 OS=Gossypium arboreum OX=29729 GN=F383_00122 PE=4 SV=1	LOC107903358	91.665	2.687	2.1	1	1	1
A0A1U8J8C9	Dbj|BAA90353.1 OS=Arabidopsis thaliana OX=3702 PE=4 SV=1	LOC107903368	23.281	38.36	20.3	4	4	4	0.998	0.911	0.927	0.991	1.117	1.072	0.978	0.77582
A0A1U8J8D0	PHD finger 3 OS=Gossypium arboreum OX=29729 GN=F383_26367 PE=4 SV=1	LOC107902842	122.97	1.8187	2.9	2	2	2	0.988	1.112	1.098	0.87	0.983	0.951	0.956	0.5731
A0A1U8J8D1	eukaryotic peptide chain release factor GTP-binding subunit ERF3A-like isoform X1 OS=Gossypium hirsutum OX=3635 GN=LOC107904667	LOC107904667	57.221	49.162	33.8	16	33	2	1.011	0.959	1.015	1.038	0.96	1.032	1.014	0.67706
A0A1U8J8E4	SH3 domain-containing protein isoform 3 OS=Theobroma cacao OX=3641 GN=TCM_039957 PE=4 SV=1	LOC107902858	128.12	2.035	19.9	20	27	1	1.021	0.97	0.897	0.993	0.941	1.218	1.113	0.27608
A0A1U8J8E6	66 kDa stress protein-like OS=Gossypium hirsutum OX=3635 GN=LOC107904673	LOC107904673	65.958	186.48	44.2	26	49	4	1.193	0.868	1.141	0.851	1.062	0.849	0.756	0.00129789
A0A1U8J8F1	outer envelope protein 64, chloroplastic OS=Gossypium hirsutum OX=3635 GN=LOC107904681	LOC107904681	64.655	29.085	19.3	10	19	3	1.215	0.921	1.134	0.693	1.081	0.927	0.741	0.038976
A0A1U8J8K4	Annexin OS=Gossypium hirsutum OX=3635 GN=LOC107904718	LOC107904718	38.466	15.13	7.6	2	2	2	1.026	1.028	1.021	0.967	0.922	1.055	1.027	0.56108
A0A1U8J8L5	tRNA-dihydrouridine(16/17) synthase [NAD (P)(+)]-like protein OS=Gossypium arboreum OX=29729 GN=F383_07396 PE=4 SV=1	LOC107904726	43.169	15.511	7.7	3	3	3	1.084	0.914	1.171	0.898	1.014	0.944	0.843	0.0185008
A0A1U8J8L7	Xylose isomerase OS=Gossypium hirsutum OX=3635 GN=LOC107904720	LOC107904720	53.06	100.65	49.7	21	62	7	0.887	1.145	0.894	1.158	0.891	1.06	1.259	0.0144643
A0A1U8J8Q1	glucan endo-1,3-beta-glucosidase 12 OS=Gossypium hirsutum OX=3635 GN=LOC107903471	LOC107903471	50.322	17.393	5.1	2	2	2
A0A1U8J8Q5	65-kDa microtubule-associated protein 1-like OS=Gossypium hirsutum OX=3635 GN=LOC107903477	LOC107903477	64.784	10.135	16.4	9	14	3	1.107	0.867	1.062	0.807	1.056	1.094	0.858	0.158175
A0A1U8J8S0	abhydrolase domain-containing protein C22H12.03-like isoform X2 OS=Gossypium hirsutum OX=3635 GN=LOC107903487	LOC107903487	47.245	5.8336	5.5	2	2	2	1.044	0.964	0.963	1.004	1.069	0.963	0.953	0.24032
A0A1U8J8S9	Transmembrane protein OS=Arabidopsis thaliana OX=3702 GN=T5E8_70 PE=2 SV=1	LOC107904771	12.199	17.97	15.1	2	2	2	1.027	1.016	0.938	1.027	1.008	1.004	1.025	0.4233
A0A1U8J8T3	AMMECR1 family OS=Theobroma cacao OX=3641 GN=TCM_044221 PE=4 SV=1	LOC107904764	23.703	51.808	32.7	6	10	6	1.026	0.98	0.977	0.969	0.971	1.117	1.031	0.58878
A0A1U8J8U3	dnaJ protein homolog OS=Gossypium hirsutum OX=3635 GN=LOC107904773	LOC107904773	46.55	5.4078	34.4	19	61	1	1.054	0.941	0.97	0.968	1.027	1.054	0.971	0.51656
A0A1U8J8V3	2-alkenal reductase (NADP(+)-dependent)-like OS=Gossypium hirsutum OX=3635 GN=LOC107903511	LOC107903511	38.596	8.1836	12.3	3	5	2	0.872	1.047	0.858	1.165	0.892	1.233	1.314	0.0053242
A0A1U8J8W3	target of Myb protein 1-like OS=Gossypium hirsutum OX=3635 GN=LOC107903521	LOC107903521	63.413	12.348	11.4	5	5	1	1.061	0.858	1.128	1.012	0.987	0.94	0.885	0.115161
A0A1U8J8Y4	dynamin-related protein 12A-like OS=Gossypium hirsutum OX=3635 GN=LOC107904802	LOC107904802	19.364	37.175	44.2	7	11	1	1.087	0.996	0.993	1.119	0.841	0.985	1.061	0.49978
A0A1U8J8Y5	calvin cycle protein CP12-3, chloroplastic-like OS=Gossypium hirsutum OX=3635 GN=LOC107904806	LOC107904806	15.629	32.39	28.7	3	5	3	1.064	0.841	1.176	0.851	1.232	0.783	0.713	0.0026033
A0A1U8J8Z0	NADPH:quinone oxidoreductase-like isoform X2 OS=Gossypium hirsutum OX=3635 GN=LOC107904811	LOC107904811	33.187	7.2719	15.1	4	6	4	0.948	1.158	1.019	1.032	0.887	0.984	1.112	0.168084
A0A1U8J8Z5	sulfite oxidase-like isoform X2 OS=Gossypium hirsutum OX=3635 GN=LOC107904815	LOC107904815	43.561	3.8684	8.9	3	3	2	0.578	1.5	0.832	1.212	0.599	1.417	2.055	0.005259
A0A1U8J944	Disease resistance protein OS=Corchorus capsularis OX=210143 GN=CCACVL1_22871 PE=3 SV=1	LOC107903583	82.872	-2	1.7	1	1	1	1.031	1.136	0.982	1.127	0.912	0.829	1.057	0.69382
A0A1U8J945	N-terminal kinase-like protein isoform X2 OS=Gossypium hirsutum OX=3635 GN=LOC107904853	LOC107904853	78.025	4.1479	15	10	13	1
A0A1U8J954	methylesterase 17-like isoform X1 OS=Gossypium hirsutum OX=3635 GN=LOC107904858	LOC107904858	33.164	7.6037	16.3	4	5	4	1.234	0.876	1.088	0.834	1.067	0.869	0.761	0.0048431
A0A1U8J958	quinone oxidoreductase-like protein 2 homolog OS=Gossypium hirsutum OX=3635 GN=LOC107904862	LOC107904862	37.113	112.81	21.1	6	10	3	1.084	0.906	1.139	0.804	1.091	0.886	0.783	0.0035229
A0A1U8J960	SCY1-like protein 2 OS=Gossypium hirsutum OX=3635 GN=LOC107904875	LOC107904875	101.02	37.591	14.1	12	16	10	1.044	0.946	1.005	1.002	1.035	0.985	0.951	0.070657
A0A1U8J976	adenylate kinase, chloroplastic-like OS=Gossypium hirsutum OX=3635 GN=LOC107904874	LOC107904874	32.501	12.631	25.4	6	6	6	1.043	0.952	1.102	0.947	1.05	0.918	0.882	0.0037215
A0A1U8J998	dynamin-related protein 1C-like OS=Gossypium hirsutum OX=3635 GN=LOC107903632	LOC107903632	68.447	88.379	34.7	20	33	15	0.975	1.023	0.964	1.025	0.974	1.062	1.068	0.0067589
A0A1U8J9A7	protein QUIRKY-like isoform X1 OS=Gossypium hirsutum OX=3635 GN=LOC107904896	LOC107904896	120.28	2.6413	13.4	12	13	1
A0A1U8J9B1	patellin-3-like OS=Gossypium hirsutum OX=3635 GN=LOC107904903	LOC107904903	66.745	12.269	48.8	24	48	4	1.21	0.624	1.443	0.611	1.349	0.701	0.484	0.00040365
A0A1U8J9B5	Tudor/PWWP/MBT superfamily protein, putative OS=Theobroma cacao OX=3641 GN=TCM_036631 PE=4 SV=1	LOC107904911	114.88	4.8734	6.8	6	6	2
A0A1U8J9C0	ras-related protein Rab7-like OS=Gossypium hirsutum OX=3635 GN=LOC107904916	LOC107904916	22.951	0.95113	32.8	6	12	0
A0A1U8J9F4	allene oxide synthase, chloroplastic-like OS=Gossypium hirsutum OX=3635 GN=LOC107904934	LOC107904934	58.764	2.2289	5.7	3	5	1	0.915	1.105	0.997	0.986	0.899	1.136	1.148	0.063444
A0A1U8J9H3	dnaJ protein homolog OS=Gossypium hirsutum OX=3635 GN=LOC107903356	LOC107903356	46.53	53	38.3	19	58	4	1.028	0.988	0.938	1.01	1.043	1.209	1.066	0.44728
A0A1U8J9I1	Proteasome subunit alpha type OS=Gossypium hirsutum OX=3635 GN=LOC107904957	LOC107904957	30.365	79.944	38.7	10	25	2	0.845	1.108	0.847	1.176	0.892	1.201	1.349	0.00056181
A0A1U8J9I9	outer envelope pore protein 24A, chloroplastic-like OS=Gossypium hirsutum OX=3635 GN=LOC107904948	LOC107904948	22.91	3.2238	15.3	3	3	3
A0A1U8J9J2	Pyruvate dehydrogenase E1 component subunit alpha OS=Gossypium hirsutum OX=3635 GN=LOC107903690	LOC107903690	43.338	26.83	38.3	18	43	6	1.013	1.03	0.95	0.957	0.992	1.005	1.013	0.6896
A0A1U8J9J3	E3 ubiquitin-protein ligase CHFR OS=Gossypium arboreum OX=29729 GN=F383_18321 PE=4 SV=1	LOC107903372	39.724	32.67	29.9	10	11	10	1.006	0.934	1.076	0.957	1.048	0.958	0.91	0.0115841
A0A1U8J9K1	Vesicle transport protein OS=Gossypium hirsutum OX=3635 GN=LOC107903383	LOC107903383	23.737	5.7364	14	2	2	1
A0A1U8J9K2	large proline-rich protein BAG6-like OS=Gossypium hirsutum OX=3635 GN=LOC107904974	LOC107904974	85.169	16.756	19.4	12	16	3	1.055	1.013	0.986	0.883	1.101	0.962	0.91	0.136965
A0A1U8J9K6	Formin-like protein OS=Gossypium hirsutum OX=3635 GN=LOC107903384	LOC107903384	72.342	2.6705	2.6	2	2	1
A0A1U8J9K9	transcription initiation factor IIF subunit beta-like OS=Gossypium hirsutum OX=3635 GN=LOC107904967	LOC107904967	30.394	23.696	17.6	3	4	3	1.003	0.959	1.025	1.017	1.04	0.964	0.958	0.117199
A0A1U8J9L3	Acyl-[acyl-carrier-protein] desaturase OS=Gossypium hirsutum OX=3635 GN=LOC107903707	LOC107903707	38.433	2.064	34.3	10	15	2	0.994	0.968	1.06	0.963	1.031	0.986	0.946	0.049182
A0A1U8J9L6	Rho-type GTPase-activating 1 OS=Gossypium arboreum OX=29729 GN=F383_09419 PE=4 SV=1	LOC107904993	16.252	1.5009	11.8	2	2	1
A0A1U8J9L7	selenoprotein K-like OS=Gossypium hirsutum OX=3635 GN=LOC107904988	LOC107904988	11.044	1.6875	20.4	1	1	1	0.906	1.023	0.881	1.112	0.81	1.342	1.339	0.030201
A0A1U8J9L8	enoyl-CoA hydratase 2, peroxisomal-like OS=Gossypium hirsutum OX=3635 GN=LOC107904979	LOC107904979	34.067	21.57	31.8	8	13	8	1.068	0.889	1.043	0.961	1.054	0.951	0.885	0.0083952
A0A1U8J9M6	DNA ligase 1-like OS=Gossypium hirsutum OX=3635 GN=LOC107905006	LOC107905006	56.314	2.8962	5.2	2	2	2	0.951	1.092	1.107	0.939	1.155	0.732	0.86	0.28594
A0A1U8J9N9	prolyl-tRNA synthetase associated domain-containing protein 1-like OS=Gossypium hirsutum OX=3635 GN=LOC107904999	LOC107904999	27.66	63.278	44.7	7	13	6	0.937	1.13	0.973	1.036	0.95	1.037	1.12	0.021744
A0A1U8J9P2	Delta-aminolevulinic acid dehydratase OS=Gossypium hirsutum OX=3635 GN=LOC107905017	LOC107905017	47.123	12.361	22.6	8	20	1	1.005	0.968	0.992	0.968	1.124	0.879	0.902	0.114755
A0A1U8J9P9	small glutamine-rich tetratricopeptide repeat-containing protein-like OS=Gossypium hirsutum OX=3635 GN=LOC107905011	LOC107905011	46.77	51.909	17.5	6	7	6	1.005	1.04	0.976	1.012	0.998	1.039	1.038	0.042518
A0A1U8J9Q2	UDP-glucose iridoid glucosyltransferase-like isoform X1 OS=Gossypium hirsutum OX=3635 GN=LOC107903417	LOC107903417	50.371	11.285	6.4	2	2	2	0.676	1.364	0.589	1.425	0.691	1.412	2.148	0.000120318
A0A1U8J9S7	probable eukaryotic translation initiation factor 5-1 OS=Gossypium hirsutum OX=3635 GN=LOC107905027	LOC107905027	48.87	1.9779	17.2	7	12	1
A0A1U8J9T3	2-isopropylmalate synthase 2, chloroplastic-like OS=Gossypium hirsutum OX=3635 GN=LOC107903771	LOC107903771	67.9	69.938	33.8	16	30	2	1.014	0.967	0.986	1.051	0.952	1.051	1.04	0.31174
A0A1U8J9T6	protein transport protein Sec24-like At3g07100 isoform X2 OS=Gossypium hirsutum OX=3635 GN=LOC107903437	LOC107903437	114.39	174.2	25	24	46	2	1.049	0.925	1.046	1.039	1.023	0.945	0.933	0.125803
A0A1U8J9T9	glucan 1,3-beta-glucosidase A-like OS=Gossypium hirsutum OX=3635 GN=LOC107905046	LOC107905046	56.619	6.6004	8.3	3	3	3	0.815	1.231	0.956	0.923	1.112	0.991	1.091	0.52218
A0A1U8J9U9	probable helicase MAGATAMA 3 isoform X3 OS=Gossypium hirsutum OX=3635 GN=LOC107905041	LOC107905041	150.94	1.9665	1.9	2	2	2	1.043	0.915	1.042	0.915	0.989	1.105	0.955	0.48654
A0A1U8J9W3	GEM-like protein 1 OS=Gossypium hirsutum OX=3635 GN=LOC107905065	LOC107905065	30.446	11.904	45	10	19	3	0.877	1.126	0.969	0.954	0.925	1.127	1.157	0.082484
A0A1U8J9X0	adenylyltransferase and sulfurtransferase MOCS3 OS=Gossypium hirsutum OX=3635 GN=LOC107903468	LOC107903468	36.515	22.525	18.4	4	4	2	0.917	1.035	1.013	0.995	0.965	1.102	1.082	0.130098
A0A1U8J9X3	phosphoribosylaminoimidazole-succinocarboxamide synthase, chloroplastic-like OS=Gossypium hirsutum OX=3635 GN=LOC107905071	LOC107905071	45.98	1.3041	33.8	12	18	2	1.151	0.894	0.997	0.968	1.094	0.882	0.846	0.031484
A0A1U8J9Z6	14-3-3-like protein OS=Gossypium hirsutum OX=3635 GN=LOC107905093	LOC107905093	30.238	140.02	56.3	16	74	1	1.249	0.959	1.017	0.802	1.17	0.766	0.735	0.028021
A0A1U8JA09	Chemoreceptor A OS=Gossypium arboreum OX=29729 GN=F383_00631 PE=4 SV=1	LOC107905081	24.093	9.2681	16	3	4	1
A0A1U8JA11	(+)-delta-cadinene synthase isozyme C2-like OS=Gossypium hirsutum OX=3635 GN=LOC107903499	LOC107903499	64.151	9.2517	19.9	10	11	2	0.399	1.809	0.379	1.668	0.368	1.634	4.46	1.3878e-06
A0A1U8JA12	Glycosyltransferase OS=Gossypium hirsutum OX=3635 GN=LOC107905104	LOC107905104	54.285	30.697	9.5	5	5	1	0.995	1.052	0.837	0.996	0.799	1.398	1.31	0.102181
A0A1U8JA24	5-methyltetrahydropteroyltriglutamate-- homocysteine methyltransferase-like OS=Gossypium hirsutum OX=3635 GN=LOC107903852	LOC107903852	84.87	8.3798	35.8	30	99	2	0.93	1.123	0.844	1.252	0.829	1.014	1.302	0.020756
A0A1U8JA26	Phospho-2-dehydro-3-deoxyheptonate aldolase OS=Gossypium hirsutum OX=3635 GN=LOC107905096	LOC107905096	59.469	124.04	43	22	44	1	0.971	0.991	1.063	0.938	1.224	0.786	0.833	0.133263
A0A1U8JA30	probable NAD(P)H dehydrogenase (Quinone) FQR1-like 1 OS=Gossypium hirsutum OX=3635 GN=LOC107903514	LOC107903514	21.662	20.896	60.1	10	33	4	0.949	0.973	0.968	0.878	1.27	0.947	0.878	0.28476
A0A1U8JA36	probable protein phosphatase 2C 59 OS=Gossypium hirsutum OX=3635 GN=LOC107905130	LOC107905130	31.815	11.871	40.1	11	16	3	0.976	0.97	0.996	1.141	0.934	1.005	1.072	0.2693
A0A1U8JA65	BnaC06g05880D protein OS=Brassica napus OX=3708 GN=BnaC06g05880D PE=4 SV=1	LOC107903545	12.93	-2	7	2	2	2	1.132	0.764	1.118	0.72	1.335	0.874	0.658	0.0066368
A0A1U8JA68	protein ECERIFERUM 26-like OS=Gossypium hirsutum OX=3635 GN=LOC107903888	LOC107903888	47.81	5.365	3.7	1	1	1
A0A1U8JA73	RNase H family protein, putative isoform 3 OS=Theobroma cacao OX=3641 GN=TCM_010210 PE=4 SV=1	LOC107903891	31.342	6.8896	6.9	2	3	2	1.033	0.931	1.007	1	1.025	1.01	0.96	0.192219
A0A1U8JA74	Transcription initiation factor IIA subunit 2 OS=Gossypium hirsutum OX=3635 GN=LOC107905137	LOC107905137	12.033	1.6	10.4	1	1	1
A0A1U8JA80	S-norcoclaurine synthase 2-like OS=Gossypium hirsutum OX=3635 GN=LOC107903554	LOC107903554	19.482	6.7658	6.9	1	2	1	1.365	0.507	1.716	0.491	1.351	0.378	0.31	0.00064227
A0A1U8JA90	NADPH--cytochrome P450 reductase OS=Gossypium hirsutum OX=3635 GN=LOC107905152	LOC107905152	77.112	5.3999	28.1	15	24	1
A0A1U8JAB1	xylulose kinase-like OS=Gossypium hirsutum OX=3635 GN=LOC107905188	LOC107905188	61.313	102.14	17.6	9	13	1	1.075	0.854	1.136	0.975	0.985	0.959	0.872	0.081022
A0A1U8JAD4	Ubiquitin-fold modifier-conjugating enzyme 1 OS=Gossypium hirsutum OX=3635 GN=LOC107905204	LOC107905204	19.64	7.9875	22.4	4	5	4	0.989	1.145	1.034	0.876	0.891	1.09	1.068	0.55082
A0A1U8JAD7	26S proteasome non-ATPase regulatory subunit 10-like isoform X1 OS=Gossypium hirsutum OX=3635 GN=LOC107903929	LOC107903929	25.598	4.4367	7.9	2	3	1
A0A1U8JAE4	cytochrome P450 81E8-like OS=Gossypium hirsutum OX=3635 GN=LOC107905216	LOC107905216	57.63	68.959	20.4	10	16	5	0.701	1.297	0.648	1.319	0.664	1.442	2.016	6.2029e-05
A0A1U8JAF9	proteasome subunit beta type-3-A isoform X3 OS=Gossypium hirsutum OX=3635 GN=LOC107905226	LOC107905226	21.536	15.314	25.7	4	8	1	0.824	1.089	0.976	1.089	0.98	1.081	1.172	0.105084
A0A1U8JAG7	transcription initiation factor TFIID subunit 4b-like isoform X2 OS=Gossypium hirsutum OX=3635 GN=LOC107905215	LOC107905215	102.19	3.3414	3.5	4	4	4	1.14	0.943	1.12	0.876	1.033	0.862	0.814	0.0074594
A0A1U8JAG8	SWI/SNF complex subunit SWI3C-like isoform X2 OS=Gossypium hirsutum OX=3635 GN=LOC107905227	LOC107905227	83.471	9.1042	5.1	4	4	4	1.182	0.952	1.13	0.838	0.968	0.908	0.823	0.053043
A0A1U8JAH3	Transcription elongation factor SPT5 OS=Gossypium hirsutum OX=3635 GN=LOC107905230	LOC107905230	113.2	5.2007	2.6	2	2	1
A0A1U8JAH5	RNA-binding protein 2-like isoform X3 OS=Gossypium hirsutum OX=3635 GN=LOC107905234	LOC107905234	27.227	21.954	13.8	3	3	2	1.057	0.861	1.168	0.937	1.117	0.823	0.784	0.0069648
A0A1U8JAI6	protein FAM188A-like OS=Gossypium hirsutum OX=3635 GN=LOC107905237	LOC107905237	66.388	2.1551	24.8	13	22	1
A0A1U8JAK1	ras-related protein RABE1c-like OS=Gossypium hirsutum OX=3635 GN=LOC107905254	LOC107905254	23.657	30.018	54.4	14	29	2	1.075	1.012	1.113	0.777	1.112	0.849	0.799	0.099479
A0A1U8JAM1	Serine/threonine-protein kinase ATM OS=Gossypium arboreum OX=29729 GN=F383_00091 PE=4 SV=1	LOC107905277	87.05	7.5442	4.3	3	3	3	1.007	0.958	1.069	1.019	0.938	1.019	0.994	0.91332
A0A1U8JAM4	UBP1-associated protein 2C-like OS=Gossypium hirsutum OX=3635 GN=LOC107903667	LOC107903667	44.188	28.864	30.6	12	18	1	0.998	0.957	1.155	1.073	0.937	0.871	0.939	0.50732
A0A1U8JAM5	calcium-transporting ATPase 1, endoplasmic reticulum-type-like OS=Gossypium hirsutum OX=3635 GN=LOC107905259	LOC107905259	116.2	307.35	32.4	32	61	5	1.061	0.985	0.959	0.993	0.954	1.05	1.018	0.6629
A0A1U8JAM7	60S ribosomal protein L4-like OS=Gossypium hirsutum OX=3635 GN=LOC107905270	LOC107905270	44.801	48.745	47.9	18	37	2	0.95	0.916	0.91	1.095	0.912	1.231	1.17	0.161056
A0A1U8JAM8	cytochrome P450 71D10-like OS=Gossypium hirsutum OX=3635 GN=LOC107903999	LOC107903999	56.993	20.345	21.1	9	11	2	1.087	0.967	1.112	0.68	1.075	1.063	0.828	0.26866
A0A1U8JAP5	protein IQ-DOMAIN 1 OS=Gossypium hirsutum OX=3635 GN=LOC107905284	LOC107905284	51.732	10.276	8.2	4	6	3	1.516	0.494	1.314	0.562	1.304	0.683	0.421	0.00119717
A0A1U8JAQ0	DNA-binding protein S1FA OS=Gossypium hirsutum OX=3635 GN=LOC107905287	LOC107905287	9.2188	1.8686	9.8	1	2	1	0.876	1.211	0.941	1.055	0.953	1.004	1.181	0.057583
A0A1U8JAQ8	SART-1 family protein DOT2 OS=Gossypium hirsutum OX=3635 GN=LOC107904018	LOC107904018	103.67	14.839	4.6	5	5	5	1.012	0.963	1.04	0.988	0.981	1.025	0.981	0.48512
A0A1U8JAU3	aquaporin TIP1-1-like OS=Gossypium hirsutum OX=3635 GN=LOC107905326	LOC107905326	25.509	43.915	6.8	2	6	2	1.037	0.84	1.183	0.76	1.274	0.851	0.701	0.0073209
A0A1U8JAU4	tRNA-dihydrouridine(47) synthase [NAD(P)(+)] OS=Gossypium hirsutum OX=3635 GN=LOC107903715	LOC107903715	80.817	32.778	13.1	8	10	8	1.022	0.876	1.008	1.07	1.003	1.031	0.982	0.75228
A0A1U8JAW0	Putative translation initiation factor IF-2 OS=Gossypium arboreum OX=29729 GN=F383_10443 PE=4 SV=1	LOC107905320	28.067	2.5774	4.2	1	2	1
A0A1U8JAX5	protein FATTY ACID EXPORT 3, chloroplastic-like isoform X2 OS=Gossypium hirsutum OX=3635 GN=LOC107903701	LOC107903701	35.188	67.782	34.5	10	16	2	1.148	1.094	1.069	0.781	1.031	0.862	0.843	0.160657
A0A1U8JAZ1	adenosine kinase 2-like OS=Gossypium hirsutum OX=3635 GN=LOC107904077	LOC107904077	37.616	123.12	41.6	11	23	8	0.994	0.983	0.962	1.013	1.095	0.972	0.973	0.55548
A0A1U8JB03	ubiquitin-like modifier-activating enzyme atg7 OS=Gossypium hirsutum OX=3635 GN=LOC107905375	LOC107905375	78.659	6.2049	3.9	3	4	3
A0A1U8JB04	LOW QUALITY PROTEIN: delta(14)-sterol reductase OS=Gossypium hirsutum OX=3635 GN=LOC107905357	LOC107905357	41.927	1.0307	2.2	1	1	1
A0A1U8JB09	beta-taxilin-like OS=Gossypium hirsutum OX=3635 GN=LOC107904090	LOC107904090	49.329	15.921	17.1	7	7	3	0.911	1.135	0.96	1.066	0.97	0.991	1.124	0.057816
A0A1U8JB18	14-3-3-like protein D isoform X1 OS=Gossypium hirsutum OX=3635 GN=LOC107905378	LOC107905378	29.323	63.902	51.2	14	39	9	1.117	0.868	1.109	0.795	1.102	0.873	0.762	0.0123152
A0A1U8JB31	probable aldo-keto reductase 2 OS=Gossypium hirsutum OX=3635 GN=LOC107903787	LOC107903787	37.632	22.976	58.3	19	42	2	0.686	1.423	0.743	1.1	0.837	1.326	1.699	0.0053783
A0A1U8JB32	protein BRASSINAZOLE-RESISTANT 1-like OS=Gossypium hirsutum OX=3635 GN=LOC107905402	LOC107905402	33.971	8.096	7.3	2	2	2	1.11	0.805	1.104	0.949	1.133	0.865	0.782	0.0068593
A0A1U8JB39	exocyst complex component SEC3A-like OS=Gossypium hirsutum OX=3635 GN=LOC107905390	LOC107905390	99.47	26.681	9.9	8	10	1
A0A1U8JB47	deoxyuridine 5'-triphosphate nucleotidohydrolase-like OS=Gossypium hirsutum OX=3635 GN=LOC107905417	LOC107905417	24.316	22.455	32.8	5	13	1	1.122	0.806	1.274	0.792	1.156	0.785	0.671	0.00052385
A0A1U8JB55	Fructose-bisphosphate aldolase OS=Gossypium hirsutum OX=3635 GN=LOC107903807	LOC107903807	42.913	216.25	46.4	17	64	1	0.803	1.261	0.911	1.135	0.905	1.106	1.337	0.0071555
A0A1U8JB62	elongation factor 2-like OS=Gossypium hirsutum OX=3635 GN=LOC107903816	LOC107903816	94.029	38.003	42.2	40	165	0
A0A1U8JB94	protein BTR1-like isoform X3 OS=Gossypium hirsutum OX=3635 GN=LOC107904167	LOC107904167	33.637	23.321	36.4	9	11	1	0.953	0.991	0.93	1.074	1	1.084	1.092	0.068879
A0A1U8JBA0	ornithine carbamoyltransferase, chloroplastic-like OS=Gossypium hirsutum OX=3635 GN=LOC107905438	LOC107905438	41.165	3.8705	35.7	11	22	1
A0A1U8JBB7	Glycine-rich protein, putative isoform 1 OS=Theobroma cacao OX=3641 GN=TCM_010013 PE=4 SV=1	LOC107903864	49.463	80.537	28.2	9	10	3	0.896	1.106	0.945	1.123	0.931	1.04	1.179	0.0043608
A0A1U8JBC1	low-temperature-induced cysteine proteinase OS=Gossypium hirsutum OX=3635 GN=LOC107905474	LOC107905474	54.705	28.84	15.7	6	6	6	0.94	1.065	0.864	1.141	0.908	1.146	1.236	0.0034045
A0A1U8JBC6	Purple acid phosphatase OS=Gossypium hirsutum OX=3635 GN=LOC107905479	LOC107905479	54.028	30.957	9.7	4	5	4	1.095	0.761	1.264	0.859	1.161	0.83	0.696	0.0027794
A0A1U8JBD3	Auxin-responsive protein OS=Corchorus capsularis OX=210143 GN=CCACVL1_08383 PE=3 SV=1	LOC107903878	65.418	2.3317	3.1	2	2	2
A0A1U8JBD6	Beta-galactosidase OS=Gossypium hirsutum OX=3635 GN=LOC107905472	LOC107905472	82.169	5.8403	2.6	2	2	1	0.945	0.952	0.895	1.118	1.027	1.097	1.105	0.2016
A0A1U8JBE0	Putative inorganic polyphosphate/atp-nad kinase OS=Gossypium arboreum OX=29729 GN=F383_06689 PE=4 SV=1	LOC107904206	16.033	1.3438	5.8	1	1	1	1	0.988	0.952	1.002	1.004	1.078	1.038	0.31458
A0A1U8JBE2	filament-like plant protein 4 OS=Gossypium hirsutum OX=3635 GN=LOC107905496	LOC107905496	117.93	6.5977	4.1	5	5	2
A0A1U8JBE6	cysteine proteinase 1-like OS=Gossypium hirsutum OX=3635 GN=LOC107905483	LOC107905483	32.028	1.2954	2.7	1	1	1
A0A1U8JBI2	synaptotagmin-2-like OS=Gossypium hirsutum OX=3635 GN=LOC107905521	LOC107905521	62.542	1.6727	4.4	3	6	1	1.336	0.65	1.244	0.741	1.283	0.647	0.528	0.000198787
A0A1U8JBI4	DNA polymerase alpha subunit B OS=Gossypium hirsutum OX=3635 GN=LOC107903900	LOC107903900	68.602	1.6694	1.6	1	2	1
A0A1U8JBK3	Aconitate hydratase OS=Gossypium hirsutum OX=3635 GN=LOC107903915	LOC107903915	108.48	323.31	38.3	36	107	10	1.125	0.889	1.055	0.937	1.105	0.866	0.819	0.0026819
A0A1U8JBL3	probable nucleoredoxin 2 isoform X2 OS=Gossypium hirsutum OX=3635 GN=LOC107905541	LOC107905541	48.76	51.101	20.9	7	9	1	0.855	0.925	0.951	1.223	0.986	1.098	1.163	0.1874
A0A1U8JBM5	exosome complex exonuclease RRP42 OS=Gossypium hirsutum OX=3635 GN=LOC107904275	LOC107904275	24.881	15.333	27	5	6	5	1.05	0.934	1.032	0.965	1.049	0.968	0.916	0.0022828
A0A1U8JBM6	putative dihydroflavonol-4-reductase OS=Gossypium hirsutum OX=3635 GN=LOC107905556	LOC107905556	37.338	11.718	21.8	7	7	4	0.907	1.151	0.879	1.014	0.886	1.163	1.246	0.0084576
A0A1U8JBP3	Alpha-amylase OS=Gossypium hirsutum OX=3635 GN=LOC107905564	LOC107905564	48.273	85.482	56.4	19	33	15	0.484	1.599	0.522	1.449	0.509	1.606	3.072	4.9413e-06
A0A1U8JBP8	protein WEAK CHLOROPLAST MOVEMENT UNDER BLUE LIGHT 1-like OS=Gossypium hirsutum OX=3635 GN=LOC107905567	LOC107905567	101.5	1.1691	23.3	19	24	1
A0A1U8JBR4	glucan endo-1,3-beta-glucosidase 6-like OS=Gossypium hirsutum OX=3635 GN=LOC107904311	LOC107904311	53.075	16.801	9.5	5	9	2	1.441	0.631	1.468	0.542	1.313	0.467	0.388	0.000522
A0A1U8JBU8	transcription factor LHW-like isoform X1 OS=Gossypium hirsutum OX=3635 GN=LOC107958150 PE=4 SV=1	LOC107905600	42.674	21.789	4.2	1	1	1	1.447	0.47	1.352	0.593	1.511	0.468	0.355	0.00025587
A0A1U8JBX1	subtilisin-like protease SBT1.7 OS=Gossypium hirsutum OX=3635 GN=LOC107905629	LOC107905629	81.058	18.882	9.2	7	13	5	1.302	0.606	1.349	0.674	1.28	0.691	0.501	8.4144e-05
A0A1U8JBX5	protein ZINC INDUCED FACILITATOR-LIKE 1-like OS=Gossypium hirsutum OX=3635 GN=LOC107904360	LOC107904360	53.589	2.626	3.3	1	1	1
A0A1U8JBY0	T-complex protein 1 subunit beta OS=Gossypium hirsutum OX=3635 GN=LOC107905639	LOC107905639	57.105	262.18	57.3	29	70	1	1.074	0.874	1.062	0.935	1.153	0.877	0.817	0.0039213
A0A1U8JBY1	S-norcoclaurine synthase 2-like OS=Gossypium hirsutum OX=3635 GN=LOC107904361	LOC107904361	18.33	27.538	42.6	8	12	5	0.734	1.186	0.715	1.264	0.912	1.045	1.48	0.0142751
A0A1U8JBY3	3-oxo-Delta(4,5)-steroid 5-beta-reductase-like OS=Gossypium hirsutum OX=3635 GN=LOC107905623	LOC107905623	44.491	14.207	37.9	15	31	4	1.127	0.825	1.119	0.855	1.129	0.91	0.767	0.0115422
A0A1U8JC08	probable serine/threonine-protein kinase At4g35230 isoform X1 OS=Gossypium hirsutum OX=3635 GN=LOC107905658	LOC107905658	57.88	49.99	21.3	8	10	3	0.948	1.007	0.921	1.126	0.882	1.165	1.199	0.021037
A0A1U8JC11	protein FLX-like 1 isoform X4 OS=Gossypium hirsutum OX=3635 GN=LOC107904020	LOC107904020	34.507	10.05	11.5	3	3	2	0.901	0.932	1.179	1.041	0.911	1.041	1.008	0.88838
A0A1U8JC14	beta-glucosidase BoGH3B-like OS=Gossypium hirsutum OX=3635 GN=LOC107904388	LOC107904388	71.336	31.895	15.5	9	10	6	0.778	1.114	0.901	1.187	0.871	1.256	1.395	0.004063
A0A1U8JC16	NADH dehydrogenase [ubiquinone] 1 beta subcomplex subunit 2-like OS=Gossypium hirsutum OX=3635 GN=LOC107905664	LOC107905664	7.8718	2.2317	24.3	2	2	1
A0A1U8JC18	ABSCISIC ACID-INSENSITIVE 5-like protein 2 isoform X2 OS=Gossypium hirsutum OX=3635 GN=LOC107904392	LOC107904392	35.419	5.6282	7	2	2	1	1.033	1.004	1.084	0.937	1.103	0.82	0.857	0.066223
A0A1U8JC30	fumarylacetoacetase-like OS=Gossypium hirsutum OX=3635 GN=LOC107905681	LOC107905681	45.864	55.084	33.8	11	24	4	1.153	0.879	1.266	0.77	1.144	0.697	0.658	0.0048573
A0A1U8JC36	Phosphatidate cytidylyltransferase OS=Gossypium hirsutum OX=3635 GN=LOC107905679	LOC107905679	48.997	9.1461	3.1	1	1	1	1.265	0.759	1.148	0.718	1.234	0.81	0.627	0.00050182
A0A1U8JC48	1-aminocyclopropane-1-carboxylate oxidase OS=Gossypium hirsutum OX=3635 GN=LOC107905676	LOC107905676	36.189	141.23	52	15	61	8	1.521	0.518	1.41	0.53	1.325	0.514	0.367	1.83034e-05
A0A1U8JC75	Dolichyl-diphosphooligosaccharide--protein glycosyltransferase subunit 1 OS=Gossypium hirsutum OX=3635 GN=LOC107904078	LOC107904078	52.88	38.305	21.2	10	16	2	0.984	1.126	0.89	0.992	0.963	1.086	1.129	0.066841
A0A1U8JC80	Chorismate synthase OS=Gossypium hirsutum OX=3635 GN=LOC107904083	LOC107904083	47.181	1.4228	23.7	10	19	1	1.153	0.803	1.19	0.763	1.199	0.834	0.678	0.000161992
A0A1U8JC93	UPF0047 protein YjbQ-like OS=Gossypium hirsutum OX=3635 GN=LOC107905710	LOC107905710	19.691	41.472	46.1	7	8	7	0.896	1.039	0.983	1.085	1.008	1.034	1.094	0.080256
A0A1U8JCC5	tRNA pseudouridine synthase A OS=Gossypium arboreum OX=29729 GN=F383_06313 PE=4 SV=1	LOC107905734	47.494	4.3001	4.5	2	3	2	1.177	0.81	1.21	0.765	1.187	0.788	0.661	2.1607e-05
A0A1U8JCC7	Phosphoglycerate mutase family protein OS=Theobroma cacao OX=3641 GN=TCM_030485 PE=4 SV=1	LOC107905745	25.534	1.6902	4.8	1	1	1	0.951	1.035	0.997	0.955	1.062	1.014	0.998	0.971
A0A1U8JCC9	long chain acyl-CoA synthetase 4-like OS=Gossypium hirsutum OX=3635 GN=LOC107904465	LOC107904465	74.263	16.873	18.7	13	17	11	1.27	0.735	1.277	0.686	1.132	0.718	0.581	0.00025782
A0A1U8JCD0	Hexosyltransferase OS=Gossypium hirsutum OX=3635 GN=LOC107905741	LOC107905741	70.526	1.6727	1.5	1	2	1	1.207	0.862	1.166	0.815	1.091	0.811	0.718	0.00074143
A0A1U8JCD8	actin-related protein 5-like isoform X2 OS=Gossypium hirsutum OX=3635 GN=LOC107904128	LOC107904128	67.394	5.4806	3.1	2	2	2	1.084	0.947	1.036	0.975	0.948	1.016	0.958	0.39542
A0A1U8JCE4	SWI/SNF complex subunit SWI3B OS=Gossypium hirsutum OX=3635 GN=LOC107905748	LOC107905748	51.458	7.2633	7.8	3	3	3	0.978	0.926	1.041	1.055	1.052	0.949	0.954	0.35506
A0A1U8JCF7	ubiquitin-conjugating enzyme E2 4 OS=Gossypium hirsutum OX=3635 GN=LOC107904483	LOC107904483	21.028	7.498	15.8	3	6	2	0.765	1.223	1.008	1.098	0.957	0.988	1.212	0.135157
A0A1U8JCI4	FAM10 family protein At4g22670-like OS=Gossypium hirsutum OX=3635 GN=LOC107904505	LOC107904505	41.551	1.7623	25.1	11	25	1
[truncated: 7,436 more rows]
