# Supplementary material for: Fumonisin B1-Induced Changes in Cotton Fiber Elongation Revealed by Sphingolipidomics and Proteomics
Source: Biomolecules. 2020 Aug 31;10(9):1258. doi: 10.3390/biom10091258 (PMC7564794; doi:10.3390/biom10091258)
Supplement: Supplementary file 1 [file biomolecules-10-01258-s001.zip › Table S4.xlsx]

## Sheet: Sheet1
Protein accession	Protein description	FB1/Control Ratio
A0A068EXJ9	Endoglucanase OS=Gossypium hirsutum OX=3635 GN=LOC107912359	1.702
A0A075T4D3	Phosphoinositide phospholipase C OS=Gossypium hirsutum OX=3635 GN=PLC	0.539
A0A076FRP2	Polyphenol oxidase-3 OS=Gossypium hirsutum OX=3635 GN=PPO-3	0.644
A0A0A7R547	Mitogen-activated protein kinase OS=Gossypium hirsutum OX=3635 GN=MPK18	2.008
A0A0P0G659	3-ketoacyl-CoA synthase OS=Gossypium hirsutum OX=3635 GN=KCS38	0.402
A0A0P0GG83	3-ketoacyl-CoA synthase OS=Gossypium hirsutum OX=3635 GN=KCS5	0.588
A0A0U1WT38	Glutathione S-transferase OS=Gossypium hirsutum OX=3635 GN=LOC107891011	2.126
A0A0U2L631	Ferritin OS=Gossypium hirsutum OX=3635 GN=FER2	0.448
A0A1U8HGQ8	very-long-chain 3-oxoacyl-CoA reductase 1-like OS=Gossypium hirsutum OX=3635 GN=LOC107886000	0.236
A0A1U8HGZ9	Acyl-coenzyme A oxidase OS=Gossypium hirsutum OX=3635 GN=LOC107886061	0.619
A0A1U8HH53	Plasma membrane ATPase OS=Gossypium hirsutum OX=3635 GN=LOC107886121	0.659
A0A1U8HH87	adenine phosphoribosyltransferase 4 OS=Gossypium hirsutum OX=3635 GN=LOC107886096	1.504
A0A1U8HHI9	21 kDa protein-like OS=Gossypium hirsutum OX=3635 GN=LOC107886220	2.998
A0A1U8HHL4	Chalcone-flavonone isomerase family protein OS=Gossypium hirsutum OX=3635 GN=LOC107886193	0.468
A0A1U8HIB4	haloacid dehalogenase-like hydrolase domain-containing protein Sgpp isoform X5 OS=Gossypium hirsutum OX=3635 GN=LOC107886386	0.653
A0A1U8HIE0	serine/threonine-protein kinase SAPK3-like OS=Gossypium hirsutum OX=3635 GN=LOC107886411	0.565
A0A1U8HIS5	Glyceraldehyde-3-phosphate dehydrogenase OS=Gossypium hirsutum OX=3635 GN=LOC107886513	4.491
A0A1U8HJ28	probable nucleoredoxin 1 OS=Gossypium hirsutum OX=3635 GN=LOC107886589	1.851
A0A1U8HJI9	GDSL esterase/lipase At5g45920-like isoform X1 OS=Gossypium hirsutum OX=3635 GN=LOC107886684	0.351
A0A1U8HJR7	"(R,S)-reticuline 7-O-methyltransferase-like OS=Gossypium hirsutum OX=3635 GN=LOC107886757"	2.796
A0A1U8HK87	myosin-1-like isoform X2 OS=Gossypium hirsutum OX=3635 GN=LOC107886881	0.654
A0A1U8HKD2	Pyruvate kinase OS=Gossypium hirsutum OX=3635 GN=LOC107886925	1.525
A0A1U8HKG2	universal stress protein A-like protein OS=Gossypium hirsutum OX=3635 GN=LOC107886946	4.636
A0A1U8HKK4	putative polyol transporter 2 OS=Gossypium hirsutum OX=3635 GN=LOC107886982	3.054
A0A1U8HL35	AT5G58210 protein OS=Arabidopsis thaliana OX=3702 GN=MCK7.8 PE=2 SV=1	0.607
A0A1U8HL76	ABC transporter G family member 11-like OS=Gossypium hirsutum OX=3635 GN=LOC107887162	0.285
A0A1U8HLK2	ectonucleotide pyrophosphatase/phosphodiesterase family member 1-like OS=Gossypium hirsutum OX=3635 GN=LOC107887253	1.596
A0A1U8HML5	BTB/POZ domain-containing protein At5g60050-like isoform X1 OS=Gossypium hirsutum OX=3635 GN=LOC107885965	0.568
A0A1U8HN76	GDSL esterase/lipase At1g54790-like isoform X2 OS=Gossypium hirsutum OX=3635 GN=LOC107887753	0.666
A0A1U8HNC1	UDP-glycosyltransferase 89B2-like OS=Gossypium hirsutum OX=3635 GN=LOC107887828	1.559
A0A1U8HNY3	transcription factor MYB32-like OS=Gossypium hirsutum OX=3635 GN=LOC107888113	0.605
A0A1U8HPL9	Octicosapeptide/Phox/Bem1p (PB1) domain-containing protein / tetratricopeptide repeat (TPR)-containing protein OS=Theobroma cacao OX=3641 GN=TCM_036959 PE=4 SV=1	0.408
A0A1U8HPP3	Pectate lyase OS=Gossypium hirsutum OX=3635 GN=LOC107886482	4.825
A0A1U8HPR7	Disease resistance protein OS=Theobroma cacao OX=3641 GN=TCM_017362 PE=4 SV=1	0.629
A0A1U8HPU8	"acyltransferase-like protein At3g26840, chloroplastic OS=Gossypium hirsutum OX=3635 GN=LOC107888440"	0.551
A0A1U8HQB4	vignain-like OS=Gossypium hirsutum OX=3635 GN=LOC107886152	0.333
A0A1U8HQM0	ADP-ribosylation factor GTPase-activating protein AGD3-like OS=Gossypium hirsutum OX=3635 GN=LOC107886724	0.556
A0A1U8HQS3	Delta-1-pyrroline-5-carboxylate synthase OS=Gossypium hirsutum OX=3635 GN=LOC107888722	1.963
A0A1U8HR33	guanine deaminase-like OS=Gossypium hirsutum OX=3635 GN=LOC107888756	1.637
A0A1U8HRG1	vacuolar-sorting receptor 3-like OS=Gossypium hirsutum OX=3635 GN=LOC107886944	1.529
A0A1U8HRG2	Lipoxygenase OS=Gossypium hirsutum OX=3635 GN=LOC107886453	0.641
A0A1U8HS30	Putative serine/threonine-protein kinase dyrk2 OS=Gossypium arboreum OX=29729 GN=F383_23626 PE=4 SV=1	0.635
A0A1U8HS59	perakine reductase-like OS=Gossypium hirsutum OX=3635 GN=LOC107889038	3.458
A0A1U8HSS0	indole-3-acetic acid-amido synthetase GH3.6-like OS=Gossypium hirsutum OX=3635 GN=LOC107886821	0.512
A0A1U8HSW6	protein STRICTOSIDINE SYNTHASE-LIKE 3-like OS=Gossypium hirsutum OX=3635 GN=LOC107889232	0.537
A0A1U8HT00	vacuolar-processing enzyme-like OS=Gossypium hirsutum OX=3635 GN=LOC107889295	0.497
A0A1U8HT35	Cysteine proteinase inhibitor OS=Gossypium hirsutum OX=3635 GN=LOC107889285	6.744
A0A1U8HTC5	Carboxypeptidase OS=Gossypium hirsutum OX=3635 GN=LOC107889351	1.596
A0A1U8HTH5	"glucan endo-1,3-beta-glucosidase-like isoform X2 OS=Gossypium hirsutum OX=3635 GN=LOC107889424"	4.256
A0A1U8HTH8	aspartic proteinase nepenthesin-1-like OS=Gossypium hirsutum OX=3635 GN=LOC107889432	0.345
A0A1U8HTZ0	serine/threonine-protein kinase Nek6-like isoform X2 OS=Gossypium hirsutum OX=3635 GN=LOC107889538	0.653
A0A1U8HUM8	"short-chain dehydrogenase TIC 32, chloroplastic-like OS=Gossypium hirsutum OX=3635 GN=LOC107889705"	0.401
A0A1U8HUQ3	D-aminoacyl-tRNA deacylase-like OS=Gossypium hirsutum OX=3635 GN=LOC107887383	1.75
A0A1U8HVK7	bifunctional epoxide hydrolase 2-like OS=Gossypium hirsutum OX=3635 GN=LOC107890052	2.544
A0A1U8HVX6	short-chain type dehydrogenase/reductase-like OS=Gossypium hirsutum OX=3635 GN=LOC107888483	2.199
A0A1U8HW63	"glucan endo-1,3-beta-glucosidase 8-like OS=Gossypium hirsutum OX=3635 GN=LOC107888547"	2.059
A0A1U8HXB1	protein WVD2-like 6 isoform X2 OS=Gossypium hirsutum OX=3635 GN=LOC107888411	0.499
A0A1U8HXE1	stem-specific protein TSJT1-like OS=Gossypium hirsutum OX=3635 GN=LOC107888871	1.658
A0A1U8HXU8	60S acidic ribosomal protein P1-like OS=Gossypium hirsutum OX=3635 GN=LOC107890794	1.557
A0A1U8HXY6	fatty acid amide hydrolase-like isoform X1 OS=Gossypium hirsutum OX=3635 GN=LOC107890812	0.194
A0A1U8HY77	protein argonaute 1-like isoform X2 OS=Gossypium hirsutum OX=3635 GN=LOC107890886	0.392
A0A1U8HYE9	probable thiol methyltransferase 2 isoform X3 OS=Gossypium hirsutum OX=3635 GN=LOC107890918	0.595
A0A1U8HYK8	probable aquaporin PIP1-4 OS=Gossypium hirsutum OX=3635 GN=LOC107890974	0.326
A0A1U8HYY4	NAD(P)-binding Rossmann-fold superfamily protein isoform 1 OS=Theobroma cacao OX=3641 GN=TCM_021916 PE=4 SV=1	0.501
A0A1U8HZ04	12S seed storage protein CRD-like OS=Gossypium hirsutum OX=3635 GN=LOC107891101	2.128
A0A1U8HZD6	enhancer of mRNA-decapping protein 4-like isoform X2 OS=Gossypium hirsutum OX=3635 GN=LOC107888981	0.587
A0A1U8HZE0	Protein CLEC16A OS=Gossypium arboreum OX=29729 GN=F383_05667 PE=4 SV=1	0.396
A0A1U8HZE7	"glucan endo-1,3-beta-glucosidase, acidic-like OS=Gossypium hirsutum OX=3635 GN=LOC107889425"	2.643
A0A1U8HZP0	Phosphoinositide phospholipase C OS=Gossypium hirsutum OX=3635 GN=LOC107889062	0.601
A0A1U8HZS9	polygalacturonase inhibitor OS=Gossypium hirsutum OX=3635 GN=LOC107889518	1.928
A0A1U8HZX2	Imidazolonepropionase OS=Gossypium arboreum OX=29729 GN=F383_35151 PE=4 SV=1	1.961
A0A1U8I077	Carboxypeptidase OS=Gossypium hirsutum OX=3635 GN=LOC107891385	2.008
A0A1U8I0C8	Protein CREG2 OS=Gossypium arboreum OX=29729 GN=F383_08169 PE=4 SV=1	1.54
A0A1U8I0E6	caffeic acid 3-O-methyltransferase 1-like OS=Gossypium hirsutum OX=3635 GN=LOC107891421	3.16
A0A1U8I0I1	Cysteine proteinase inhibitor OS=Gossypium hirsutum OX=3635 GN=LOC107891454	3.949
A0A1U8I0I8	feruloyl CoA ortho-hydroxylase 1-like OS=Gossypium hirsutum OX=3635 GN=LOC107891457	2.939
A0A1U8I0U2	Superoxide dismutase [Cu-Zn] OS=Gossypium hirsutum OX=3635 GN=LOC107891526	0.515
A0A1U8I0V3	Imidazolonepropionase OS=Gossypium arboreum OX=29729 GN=F383_35151 PE=4 SV=1	2.328
A0A1U8I1N6	syntaxin-61-like OS=Gossypium hirsutum OX=3635 GN=LOC107891772	0.664
A0A1U8I250	3-isopropylmalate dehydratase large subunit-like isoform X1 OS=Gossypium hirsutum OX=3635 GN=LOC107891890	2.362
A0A1U8I256	glutathione S-transferase L3-like OS=Gossypium hirsutum OX=3635 GN=LOC107889730	2.802
A0A1U8I2K8	cytochrome P450 CYP736A12-like OS=Gossypium hirsutum OX=3635 GN=LOC107892025	4.089
A0A1U8I2M5	Peptidylprolyl isomerase OS=Gossypium hirsutum OX=3635 GN=LOC107890513	2.178
A0A1U8I2Y8	"glucan endo-1,3-beta-glucosidase, basic vacuolar isoform-like OS=Gossypium hirsutum OX=3635 GN=LOC107892119"	2.933
A0A1U8I2Z3	nuclear pore complex protein GP210-like isoform X1 OS=Gossypium hirsutum OX=3635 GN=LOC107892125	1.698
A0A1U8I304	"Sucrase/ferredoxin-like family protein, putative isoform 1 OS=Theobroma cacao OX=3641 GN=TCM_016974 PE=4 SV=1"	0.622
A0A1U8I3G9	cannabidiolic acid synthase-like OS=Gossypium hirsutum OX=3635 GN=LOC107890732	1.791
A0A1U8I4W3	Peroxidase OS=Gossypium hirsutum OX=3635 GN=LOC107891116	0.511
A0A1U8I5P4	Vacuolar cation/proton exchanger OS=Gossypium hirsutum OX=3635 GN=LOC107890965	1.715
A0A1U8I5T3	flotillin-like protein 4 OS=Gossypium hirsutum OX=3635 GN=LOC107891325	4.8
A0A1U8I5U0	protein SRC1-like isoform X3 OS=Gossypium hirsutum OX=3635 GN=LOC107893147	4.241
A0A1U8I5U3	glutathione S-transferase U8-like OS=Gossypium hirsutum OX=3635 GN=LOC107891002	1.698
A0A1U8I607	histone H1-like OS=Gossypium hirsutum OX=3635 GN=LOC107893211	0.56
A0A1U8I634	calreticulin OS=Gossypium hirsutum OX=3635 GN=LOC107893231	1.573
A0A1U8I670	ABC transporter G family member 13-like isoform X2 OS=Gossypium hirsutum OX=3635 GN=LOC107891418	0.608
A0A1U8I679	T31J12.3 protein OS=Arabidopsis thaliana OX=3702 GN=At1g09310 PE=1 SV=1	0.33
A0A1U8I691	protein IQ-DOMAIN 1-like OS=Gossypium hirsutum OX=3635 GN=LOC107891112	0.656
A0A1U8I6G4	serine/threonine-protein kinase At5g01020-like OS=Gossypium hirsutum OX=3635 GN=LOC107893363	1.663
A0A1U8I6I4	Sucrose synthase OS=Gossypium hirsutum OX=3635 GN=LOC107893375	2.264
A0A1U8I6K3	aspartic proteinase nepenthesin-1-like OS=Gossypium hirsutum OX=3635 GN=LOC107891178	0.318
A0A1U8I6M9	exosome complex exonuclease RRP46 homolog OS=Gossypium hirsutum OX=3635 GN=LOC107893411	0.623
A0A1U8I6R3	probable sugar phosphate/phosphate translocator At5g25400 OS=Gossypium hirsutum OX=3635 GN=LOC107893443	0.646
A0A1U8I6W4	protein WVD2-like 6 isoform X2 OS=Gossypium hirsutum OX=3635 GN=LOC107893448	0.64
A0A1U8I6Z2	ubiquitin carboxyl-terminal hydrolase 26-like isoform X2 OS=Gossypium hirsutum OX=3635 GN=LOC107893490	0.639
A0A1U8I776	"glucan endo-1,3-beta-glucosidase, acidic-like OS=Gossypium hirsutum OX=3635 GN=LOC107891341"	12.027
A0A1U8I7D7	glycine-rich RNA-binding protein RZ1A-like OS=Gossypium hirsutum OX=3635 GN=LOC107893577	0.552
A0A1U8I7F9	Lipoxygenase OS=Gossypium hirsutum OX=3635 GN=LOC107893644	2.146
A0A1U8I8R9	glutamate 5-kinase OS=Gossypium hirsutum OX=3635 GN=LOC107893867	0.658
A0A1U8I8W6	pyrophosphate-energized vacuolar membrane proton pump-like OS=Gossypium hirsutum OX=3635 GN=LOC107893910	0.507
A0A1U8I8X8	lysine-specific demethylase JMJ25-like OS=Gossypium hirsutum OX=3635 GN=LOC107891819	0.586
A0A1U8I969	Putative HR-like lesion-inducing protein OS=Gossypium arboreum OX=29729 PE=2 SV=1	0.526
A0A1U8I9E0	"AAA-ATPase ASD, mitochondrial-like OS=Gossypium hirsutum OX=3635 GN=LOC107892327"	3.355
A0A1U8I9J9	fatty acid amide hydrolase-like isoform X2 OS=Gossypium hirsutum OX=3635 GN=LOC107894183	0.649
A0A1U8IBL4	protein HASTY 1-like OS=Gossypium hirsutum OX=3635 GN=LOC107893251	0.641
A0A1U8IBT7	protein YLS3-like OS=Gossypium hirsutum OX=3635 GN=LOC107894907	0.237
A0A1U8IBY6	protein NUCLEAR FUSION DEFECTIVE 4-like OS=Gossypium hirsutum OX=3635 GN=LOC107893348	0.568
A0A1U8IC45	copper transporter 5.1-like OS=Gossypium hirsutum OX=3635 GN=LOC107893389	1.756
A0A1U8IC89	sucrose transport protein SUC8-like OS=Gossypium hirsutum OX=3635 GN=LOC107895105	0.351
A0A1U8ICR1	Glyceraldehyde-3-phosphate dehydrogenase OS=Gossypium hirsutum OX=3635 GN=LOC107895144	0.553
A0A1U8ID43	Auxin-repressed 12.5 kDa OS=Gossypium arboreum OX=29729 GN=F383_30533 PE=4 SV=1	0.52
A0A1U8IDF7	Tubulin alpha chain OS=Gossypium hirsutum OX=3635 GN=LOC107893767	0.333
A0A1U8IE24	FHA domain-containing protein DDL-like isoform X4 OS=Gossypium hirsutum OX=3635 GN=LOC107893531	1.693
A0A1U8IEL7	major pollen allergen Bet v 1-F/I-like OS=Gossypium hirsutum OX=3635 GN=LOC107895962	12.425
A0A1U8IEM9	major pollen allergen Bet v 1-E-like OS=Gossypium hirsutum OX=3635 GN=LOC107895972	2.375
A0A1U8IF38	F-box only 46 OS=Gossypium arboreum OX=29729 GN=F383_34356 PE=4 SV=1	0.58
A0A1U8IFE0	Glycosyltransferase OS=Gossypium hirsutum OX=3635 GN=LOC107893931	0.389
A0A1U8IFF6	MATH domain and coiled-coil domain-containing protein At3g58270-like OS=Gossypium hirsutum OX=3635 GN=LOC107896272	2.269
A0A1U8IFF9	Peroxidase OS=Gossypium hirsutum OX=3635 GN=LOC107893939	2.584
A0A1U8IFG9	Golgin subfamily A member 4 OS=Theobroma cacao OX=3641 GN=TCM_037132 PE=4 SV=1	0.524
A0A1U8IFI4	dynamin-related protein 5A-like OS=Gossypium hirsutum OX=3635 GN=LOC107893959	1.505
A0A1U8IFY4	rRNA N-glycosidase OS=Gossypium hirsutum OX=3635 GN=LOC107894520	2.239
A0A1U8IG07	Trihelix transcription factor OS=Gossypium hirsutum OX=3635 GN=LOC107896395	0.464
A0A1U8IG60	nephrocystin-3-like OS=Gossypium hirsutum OX=3635 GN=LOC107896447	0.54
A0A1U8IGN9	22.0 kDa class IV heat shock protein-like OS=Gossypium hirsutum OX=3635 GN=LOC107894831	1.93
A0A1U8IGR3	Phytochrome OS=Gossypium hirsutum OX=3635 GN=LOC107896595	0.544
A0A1U8IGV8	bifunctional epoxide hydrolase 2-like OS=Gossypium hirsutum OX=3635 GN=LOC107896684	1.577
A0A1U8IHA4	endochitinase EP3-like OS=Gossypium hirsutum OX=3635 GN=LOC107896799	3.138
A0A1U8IHD2	GRF1-interacting factor 1-like isoform X1 OS=Gossypium hirsutum OX=3635 GN=LOC107895071	0.325
A0A1U8IHK0	F-box/kelch-repeat protein At3g23880-like isoform X2 OS=Gossypium hirsutum OX=3635 GN=LOC107896790	1.525
A0A1U8IHK6	Non-specific lipid-transfer protein OS=Gossypium hirsutum OX=3635 GN=LOC107896814	0.623
A0A1U8IHK7	endochitinase EP3-like OS=Gossypium hirsutum OX=3635 GN=LOC107896798	2.519
A0A1U8IHW8	calmodulin-like protein 7 OS=Gossypium hirsutum OX=3635 GN=LOC107896932	0.438
A0A1U8IIR6	ABC transporter B family member 11-like OS=Gossypium hirsutum OX=3635 GN=LOC107897158	3.744
A0A1U8IJA6	exocyst complex component SEC6 isoform X1 OS=Gossypium hirsutum OX=3635 GN=LOC107897327	1.598
A0A1U8IJF0	GDSL esterase/lipase APG-like OS=Gossypium hirsutum OX=3635 GN=LOC107897359	0.399
A0A1U8IJF4	IAA-amino acid hydrolase ILR1-like 4 isoform X1 OS=Gossypium hirsutum OX=3635 GN=LOC107897363	2.697
A0A1U8IJS2	protein HOTHEAD-like OS=Gossypium hirsutum OX=3635 GN=LOC107897399	0.511
A0A1U8IK15	Plasma membrane ATPase OS=Gossypium hirsutum OX=3635 GN=LOC107897472	0.588
A0A1U8IKN9	"pyruvate, phosphate dikinase 2-like OS=Gossypium hirsutum OX=3635 GN=LOC107897656"	2.395
A0A1U8IKY5	U-box domain-containing protein 34-like isoform X4 OS=Gossypium hirsutum OX=3635 GN=LOC107897722	0.476
A0A1U8ILE7	kinesin-like protein KIF22 OS=Gossypium hirsutum OX=3635 GN=LOC107897880	1.865
A0A1U8ILG3	tobamovirus multiplication protein 2A-like OS=Gossypium hirsutum OX=3635 GN=LOC107896541	0.497
A0A1U8ILL0	Plasma membrane fusion PRM1 OS=Gossypium arboreum OX=29729 GN=F383_14893 PE=4 SV=1	2.646
A0A1U8ILM1	ATP-citrate synthase beta chain protein 2 OS=Gossypium hirsutum OX=3635 GN=LOC107896593	0.615
A0A1U8ILQ0	"acetate/butyrate--CoA ligase AAE7, peroxisomal-like OS=Gossypium hirsutum OX=3635 GN=LOC107896613"	1.927
A0A1U8IMY5	basic blue protein-like OS=Gossypium hirsutum OX=3635 GN=LOC107898524	0.572
A0A1U8IN52	"pentatricopeptide repeat-containing protein At1g79490, mitochondrial-like OS=Gossypium hirsutum OX=3635 GN=LOC107896550"	0.313
A0A1U8IN61	probable serine protease EDA2 OS=Gossypium hirsutum OX=3635 GN=LOC107896563	1.602
A0A1U8IN75	SWI/SNF complex subunit SWI3D-like isoform X1 OS=Gossypium hirsutum OX=3635 GN=LOC107898593	0.631
A0A1U8INC2	major pollen allergen Bet v 1-A-like OS=Gossypium hirsutum OX=3635 GN=LOC107896609	2.069
A0A1U8INP6	bifunctional epoxide hydrolase 2-like OS=Gossypium hirsutum OX=3635 GN=LOC107896704	0.655
A0A1U8IPF4	bifunctional epoxide hydrolase 2-like OS=Gossypium hirsutum OX=3635 GN=LOC107898944	0.392
A0A1U8IPX8	rapid alkalinization factor-like OS=Gossypium hirsutum OX=3635 GN=LOC107899086	1.548
A0A1U8IQ01	T-complex protein 1 subunit delta OS=Gossypium hirsutum OX=3635 GN=LOC107899056	0.553
A0A1U8IQ93	malonate--CoA ligase-like OS=Gossypium hirsutum OX=3635 GN=LOC107897183	0.608
A0A1U8IQH4	multiprotein-bridging factor 1b OS=Gossypium hirsutum OX=3635 GN=LOC107897254	0.655
A0A1U8IQU9	aldo-keto reductase family 4 member C9-like OS=Gossypium hirsutum OX=3635 GN=LOC107899336	1.919
A0A1U8IR26	universal stress protein YxiE-like OS=Gossypium hirsutum OX=3635 GN=LOC107899349	2.165
A0A1U8IRB9	casein kinase II subunit alpha-like OS=Gossypium hirsutum OX=3635 GN=LOC107899416	1.609
A0A1U8IRF6	A-kinase anchor protein 12-like isoform X2 OS=Gossypium hirsutum OX=3635 GN=LOC107897915	0.46
A0A1U8IRH7	protein fluG-like OS=Gossypium hirsutum OX=3635 GN=LOC107899497	1.833
A0A1U8IRM4	auxin transporter-like protein 2 OS=Gossypium hirsutum OX=3635 GN=LOC107899523	0.451
A0A1U8IRQ3	Glutathione S-transferase 2 OS=Gossypium hirsutum OX=3635 GN=LOC107898050	0.483
A0A1U8IRR9	protein NETWORKED 4A-like OS=Gossypium hirsutum OX=3635 GN=LOC107899552	0.482
A0A1U8IRW0	gamma-interferon-inducible lysosomal thiol reductase-like OS=Gossypium hirsutum OX=3635 GN=LOC107899584	0.312
A0A1U8IRY4	polygalacturonase-like OS=Gossypium hirsutum OX=3635 GN=LOC107899601	3.61
A0A1U8IS12	glutathione S-transferase U17-like OS=Gossypium hirsutum OX=3635 GN=LOC107899606	0.554
A0A1U8IS47	Cytokinin riboside 5'-monophosphate phosphoribohydrolase OS=Gossypium hirsutum OX=3635 GN=LOC107899641	2.173
A0A1U8ISH6	21 kDa seed protein-like OS=Gossypium hirsutum OX=3635 GN=LOC107897808	3.423
A0A1U8ISM3	ultraviolet-B receptor UVR8-like OS=Gossypium hirsutum OX=3635 GN=LOC107899831	2.91
A0A1U8IT97	Endoglucanase E1 OS=Gossypium arboreum OX=29729 GN=F383_09225 PE=3 SV=1	1.658
A0A1U8ITE6	peamaclein-like OS=Gossypium hirsutum OX=3635 GN=LOC107900187	3.244
A0A1U8IU00	cucumisin-like isoform X1 OS=Gossypium hirsutum OX=3635 GN=LOC107900456	3.908
A0A1U8IU31	Peroxidase OS=Gossypium hirsutum OX=3635 GN=LOC107898474	2.344
A0A1U8IU87	DNA-directed RNA polymerases IV and V subunit 4-like OS=Gossypium hirsutum OX=3635 GN=LOC107900558	0.645
A0A1U8IUG7	cation/calcium exchanger 4-like isoform X2 OS=Gossypium hirsutum OX=3635 GN=LOC107900604	1.907
A0A1U8IUJ3	cytochrome P450 71D10-like OS=Gossypium hirsutum OX=3635 GN=LOC107898600	1.905
A0A1U8IUN0	"external alternative NAD(P)H-ubiquinone oxidoreductase B2, mitochondrial-like OS=Gossypium hirsutum OX=3635 GN=LOC107900620"	2.09
A0A1U8IUV0	Pectin acetylesterase OS=Gossypium hirsutum OX=3635 GN=LOC107900704	3.003
A0A1U8IV08	UPF0483 protein AGAP003155-like OS=Gossypium hirsutum OX=3635 GN=LOC107900757	1.68
A0A1U8IV37	DNA-directed RNA polymerase subunit beta OS=Gossypium arboreum OX=29729 GN=F383_20410 PE=4 SV=1	2.385
A0A1U8IVV1	protein DOWNSTREAM OF FLC-like OS=Gossypium hirsutum OX=3635 GN=LOC107900932	1.686
A0A1U8IVX9	Transmembrane 9 superfamily member OS=Gossypium hirsutum OX=3635 GN=LOC107899369	0.584
A0A1U8IW18	PHD finger protein ALFIN-LIKE 4-like isoform X2 OS=Gossypium hirsutum OX=3635 GN=LOC107901006	0.636
A0A1U8IW55	Fructose-bisphosphate aldolase OS=Gossypium hirsutum OX=3635 GN=LOC107899428	1.662
A0A1U8IWD8	peroxisomal and mitochondrial division factor 2-like OS=Gossypium hirsutum OX=3635 GN=LOC107901065	0.592
A0A1U8IWV6	Serpentine receptor class alpha-12 OS=Gossypium arboreum OX=29729 GN=F383_11478 PE=4 SV=1	0.328
A0A1U8IX01	V-type proton ATPase subunit G OS=Gossypium hirsutum OX=3635 GN=LOC107899649	1.635
A0A1U8IX03	ras-related protein RABE1c-like isoform X2 OS=Gossypium hirsutum OX=3635 GN=LOC107899284	0.416
A0A1U8IX69	aldo-keto reductase family 4 member C9-like OS=Gossypium hirsutum OX=3635 GN=LOC107899342	1.637
A0A1U8IXE3	Envelope glycoprotein B OS=Gossypium arboreum OX=29729 GN=F383_21294 PE=4 SV=1	1.922
A0A1U8IXP3	"long chain acyl-CoA synthetase 9, chloroplastic-like OS=Gossypium hirsutum OX=3635 GN=LOC107901415"	0.615
A0A1U8IXR0	Aldehyde dehydrogenase OS=Gossypium hirsutum OX=3635 GN=LOC107901426	1.638
A0A1U8IY48	protein STRICTOSIDINE SYNTHASE-LIKE 3-like OS=Gossypium hirsutum OX=3635 GN=LOC107901491	0.506
A0A1U8IYD6	Ribosomal protein L37 OS=Gossypium hirsutum OX=3635 GN=LOC107901560	0.6
A0A1U8IZB2	non-classical arabinogalactan protein 31-like isoform X2 OS=Gossypium hirsutum OX=3635 GN=LOC107901805	3.221
A0A1U8IZD2	auxin-repressed 12.5 kDa protein-like isoform X2 OS=Gossypium hirsutum OX=3635 GN=LOC107901799	0.556
A0A1U8IZW7	Leucine--tRNA ligase OS=Gossypium arboreum OX=29729 GN=F383_30234 PE=4 SV=1	0.54
A0A1U8IZZ5	importin-5-like OS=Gossypium hirsutum OX=3635 GN=LOC107901999	0.553
A0A1U8J024	Peroxidase OS=Gossypium hirsutum OX=3635 GN=LOC107901996	2.283
A0A1U8J046	temperature-induced lipocalin-1-like OS=Gossypium hirsutum OX=3635 GN=LOC107900483	0.571
A0A1U8J0I8	L-ascorbate oxidase homolog OS=Gossypium hirsutum OX=3635 GN=LOC107900589	1.786
A0A1U8J0S4	isoflavone reductase homolog OS=Gossypium hirsutum OX=3635 GN=LOC107900659	4.576
A0A1U8J0V9	acetyl-CoA carboxylase 1-like isoform X1 OS=Gossypium hirsutum OX=3635 GN=LOC107900939	0.657
A0A1U8J0X1	upstream activation factor subunit UAF30-like OS=Gossypium hirsutum OX=3635 GN=LOC107900687	0.572
A0A1U8J166	Reticulon-like protein OS=Gossypium hirsutum OX=3635 GN=LOC107901017	1.595
A0A1U8J1L8	WD-40 repeat-containing protein MSI4-like OS=Gossypium hirsutum OX=3635 GN=LOC107901112	0.468
A0A1U8J1P8	probable serine/threonine-protein kinase At1g54610 OS=Gossypium hirsutum OX=3635 GN=LOC107902629	0.458
A0A1U8J1V5	transcriptional corepressor LEUNIG-like isoform X4 OS=Gossypium hirsutum OX=3635 GN=LOC107901203	0.637
A0A1U8J222	AAA-ATPase At2g18193-like isoform X2 OS=Gossypium hirsutum OX=3635 GN=LOC107901240	2.258
A0A1U8J2T9	Protein translocase subunit SecA OS=Gossypium arboreum OX=29729 GN=F383_34178 PE=4 SV=1	0.414
A0A1U8J306	ABC transporter G family member 32-like OS=Gossypium hirsutum OX=3635 GN=LOC107901204	0.485
A0A1U8J344	GDSL esterase/lipase 1-like OS=Gossypium hirsutum OX=3635 GN=LOC107903210	5.608
A0A1U8J3J6	protein RRC1-like isoform X2 OS=Gossypium hirsutum OX=3635 GN=LOC107901654	1.682
A0A1U8J3M8	"polyphenol oxidase, chloroplastic-like OS=Gossypium hirsutum OX=3635 GN=LOC107901676"	1.591
A0A1U8J3Q5	scarecrow-like protein 5 OS=Gossypium hirsutum OX=3635 GN=LOC107903436	0.654
A0A1U8J3V8	Small ubiquitin-related modifier OS=Gossypium hirsutum OX=3635 GN=LOC107903470	0.645
A0A1U8J404	UDP-arabinopyranose mutase 1-like OS=Gossypium hirsutum OX=3635 GN=LOC107901434	8.169
A0A1U8J462	"beta-fructofuranosidase, insoluble isoenzyme CWINV1-like isoform X3 OS=Gossypium hirsutum OX=3635 GN=LOC107901479"	0.347
A0A1U8J4R6	probable sarcosine oxidase OS=Gossypium hirsutum OX=3635 GN=LOC107901637	0.612
A0A1U8J5V6	probable glutathione S-transferase OS=Gossypium hirsutum OX=3635 GN=LOC107903988	0.461
A0A1U8J628	"trifunctional UDP-glucose 4,6-dehydratase/UDP-4-keto-6-deoxy-D-glucose 3,5-epimerase/UDP-4-keto-L-rhamnose-reductase RHM1-like OS=Gossypium hirsutum OX=3635 GN=LOC107904028"	1.778
A0A1U8J6X6	UMP-CMP kinase OS=Gossypium hirsutum OX=3635 GN=LOC107904290	0.48
A0A1U8J6Z9	Glycosyltransferase OS=Gossypium hirsutum OX=3635 GN=LOC107904309	0.474
A0A1U8J7I0	Peroxidase OS=Gossypium hirsutum OX=3635 GN=LOC107904435	1.81
A0A1U8J817	Pectinesterase OS=Gossypium hirsutum OX=3635 GN=LOC107902709	1.643
A0A1U8J8Z5	sulfite oxidase-like isoform X2 OS=Gossypium hirsutum OX=3635 GN=LOC107904815	2.055
A0A1U8J9B1	patellin-3-like OS=Gossypium hirsutum OX=3635 GN=LOC107904903	0.484
A0A1U8J9Q2	UDP-glucose iridoid glucosyltransferase-like isoform X1 OS=Gossypium hirsutum OX=3635 GN=LOC107903417	2.148
A0A1U8JA11	(+)-delta-cadinene synthase isozyme C2-like OS=Gossypium hirsutum OX=3635 GN=LOC107903499	4.46
A0A1U8JA65	BnaC06g05880D protein OS=Brassica napus OX=3708 GN=BnaC06g05880D PE=4 SV=1	0.658
A0A1U8JA80	S-norcoclaurine synthase 2-like OS=Gossypium hirsutum OX=3635 GN=LOC107903554	0.31
A0A1U8JAE4	cytochrome P450 81E8-like OS=Gossypium hirsutum OX=3635 GN=LOC107905216	2.016
A0A1U8JAP5	protein IQ-DOMAIN 1 OS=Gossypium hirsutum OX=3635 GN=LOC107905284	0.421
A0A1U8JB31	probable aldo-keto reductase 2 OS=Gossypium hirsutum OX=3635 GN=LOC107903787	1.699
A0A1U8JBI2	synaptotagmin-2-like OS=Gossypium hirsutum OX=3635 GN=LOC107905521	0.528
A0A1U8JBP3	Alpha-amylase OS=Gossypium hirsutum OX=3635 GN=LOC107905564	3.072
A0A1U8JBR4	"glucan endo-1,3-beta-glucosidase 6-like OS=Gossypium hirsutum OX=3635 GN=LOC107904311"	0.388
A0A1U8JBU8	transcription factor LHW-like isoform X1 OS=Gossypium hirsutum OX=3635 GN=LOC107958150 PE=4 SV=1	0.355
A0A1U8JBX1	subtilisin-like protease SBT1.7 OS=Gossypium hirsutum OX=3635 GN=LOC107905629	0.501
A0A1U8JC30	fumarylacetoacetase-like OS=Gossypium hirsutum OX=3635 GN=LOC107905681	0.658
A0A1U8JC36	Phosphatidate cytidylyltransferase OS=Gossypium hirsutum OX=3635 GN=LOC107905679	0.627
A0A1U8JC48	1-aminocyclopropane-1-carboxylate oxidase OS=Gossypium hirsutum OX=3635 GN=LOC107905676	0.367
A0A1U8JCC5	tRNA pseudouridine synthase A OS=Gossypium arboreum OX=29729 GN=F383_06313 PE=4 SV=1	0.661
A0A1U8JCC9	long chain acyl-CoA synthetase 4-like OS=Gossypium hirsutum OX=3635 GN=LOC107904465	0.581
A0A1U8JCK3	nicastrin-like isoform X2 OS=Gossypium hirsutum OX=3635 GN=LOC107904189	1.723
A0A1U8JCM9	auxin-repressed 12.5 kDa protein-like isoform X2 OS=Gossypium hirsutum OX=3635 GN=LOC107905802	0.511
A0A1U8JCV4	caffeoylshikimate esterase-like OS=Gossypium hirsutum OX=3635 GN=LOC107904266	0.485
A0A1U8JD26	Aminomethyltransferase OS=Gossypium hirsutum OX=3635 GN=LOC107905916	0.566
A0A1U8JD30	BnaC05g08810D protein OS=Brassica napus OX=3708 GN=BnaC05g08810D PE=4 SV=1	0.599
A0A1U8JD53	3-oxo-5-alpha-steroid 4-dehydrogenase 1 OS=Gossypium arboreum OX=29729 GN=F383_27647 PE=4 SV=1	1.55
A0A1U8JD61	anthocyanidin reductase-like OS=Gossypium hirsutum OX=3635 GN=LOC107905961	0.366
A0A1U8JD95	LOW QUALITY PROTEIN: CSC1-like protein ERD4 OS=Gossypium hirsutum OX=3635 GN=LOC107905985	0.453
A0A1U8JDF1	vesicle-associated membrane protein 721-like OS=Gossypium hirsutum OX=3635 GN=LOC107906000	0.588
A0A1U8JDF8	protein argonaute 1-like isoform X2 OS=Gossypium hirsutum OX=3635 GN=LOC107904760	0.666
A0A1U8JDL0	14 kDa proline-rich protein DC2.15-like OS=Gossypium hirsutum OX=3635 GN=LOC107904456	2.034
A0A1U8JE50	BAHD acyltransferase DCR-like OS=Gossypium hirsutum OX=3635 GN=LOC107904606	0.249
A0A1U8JE59	3-ketoacyl-CoA synthase OS=Gossypium hirsutum OX=3635 GN=LOC107906172	0.344
A0A1U8JE68	uncharacterized sugar kinase slr0537-like OS=Gossypium hirsutum OX=3635 GN=LOC107904958	1.513
A0A1U8JEA7	protein argonaute 4-like OS=Gossypium hirsutum OX=3635 GN=LOC107906203	0.606
A0A1U8JEF9	aspartyl protease AED3-like OS=Gossypium hirsutum OX=3635 GN=LOC107905052	1.572
A0A1U8JEJ5	homeobox-leucine zipper protein HDG11-like OS=Gossypium hirsutum OX=3635 GN=LOC107904747	0.254
A0A1U8JEN6	alpha carbonic anhydrase 7-like isoform X1 OS=Gossypium hirsutum OX=3635 GN=LOC107906252	2.906
A0A1U8JEQ5	Transmembrane 9 superfamily member OS=Gossypium hirsutum OX=3635 GN=LOC107906317	0.5
A0A1U8JER5	Uncharacterized protein	0.436
A0A1U8JET9	aspartyl protease AED3-like OS=Gossypium hirsutum OX=3635 GN=LOC107904810	1.811
A0A1U8JF18	putative 12-oxophytodienoate reductase 11 OS=Gossypium hirsutum OX=3635 GN=LOC107906409	0.372
A0A1U8JF54	protein TOPLESS OS=Gossypium hirsutum OX=3635 GN=LOC107906445	0.625
A0A1U8JFB6	adenine phosphoribosyltransferase 5-like isoform X1 OS=Gossypium hirsutum OX=3635 GN=LOC107906453	0.647
A0A1U8JFH5	aspartate aminotransferase-like isoform X1 OS=Gossypium hirsutum OX=3635 GN=LOC107906496	1.588
A0A1U8JFM9	neutral ceramidase-like OS=Gossypium hirsutum OX=3635 GN=LOC107906595	1.737
A0A1U8JFP7	"glucan endo-1,3-beta-glucosidase 7-like OS=Gossypium hirsutum OX=3635 GN=LOC107905420"	3.941
A0A1U8JFT1	zinc transporter 2-like OS=Gossypium hirsutum OX=3635 GN=LOC107906571	2.63
A0A1U8JG33	probable (S)-N-methylcoclaurine 3'-hydroxylase isozyme 2 OS=Gossypium hirsutum OX=3635 GN=LOC107906711	0.395
A0A1U8JG61	Beta-galactosidase OS=Gossypium hirsutum OX=3635 GN=LOC107906729	0.658
A0A1U8JG95	ABC transporter G family member 15-like OS=Gossypium hirsutum OX=3635 GN=LOC107906699	0.259
A0A1U8JGC5	Peptidyl-prolyl cis-trans isomerase OS=Gossypium hirsutum OX=3635 GN=LOC107905244	0.657
A0A1U8JGE9	aspartyl protease family protein At5g10770-like OS=Gossypium hirsutum OX=3635 GN=LOC107906801	0.662
A0A1U8JGF2	nuclear transcription factor Y subunit B-10-like isoform X2 OS=Gossypium hirsutum OX=3635 GN=LOC107905274	0.565
A0A1U8JGJ3	Phenylalanine ammonia-lyase OS=Gossypium hirsutum OX=3635 GN=LOC107905303	0.352
A0A1U8JGK3	serine/arginine-rich splicing factor RSZ22-like isoform X3 OS=Gossypium hirsutum OX=3635 GN=LOC107906788	0.563
A0A1U8JGW1	early nodulin-like protein 1 OS=Gossypium hirsutum OX=3635 GN=LOC107906895	0.544
A0A1U8JGW3	BURP domain protein RD22-like isoform X2 OS=Gossypium hirsutum OX=3635 GN=LOC107906941	0.574
A0A1U8JH88	"UDP-sulfoquinovose synthase, chloroplastic-like OS=Gossypium hirsutum OX=3635 GN=LOC107907010"	0.577
A0A1U8JHC6	Nucleic acid-binding protein OS=Corchorus capsularis OX=210143 GN=CCACVL1_15715 PE=4 SV=1	0.642
A0A1U8JHJ3	cysteine proteinase RD21a-like OS=Gossypium hirsutum OX=3635 GN=LOC107905599	1.806
A0A1U8JHN3	uncharacterized membrane protein At1g16860-like OS=Gossypium hirsutum OX=3635 GN=LOC107905896	0.483
A0A1U8JHR4	phosphoprotein ECPP44-like OS=Gossypium hirsutum OX=3635 GN=LOC107905666	1.664
A0A1U8JI07	ras-related protein RABB1c OS=Gossypium hirsutum OX=3635 GN=LOC107905740	0.626
A0A1U8JIN4	nucleolin-like OS=Gossypium hirsutum OX=3635 GN=LOC107907309	1.696
A0A1U8JIS0	Peroxidase OS=Gossypium hirsutum OX=3635 GN=LOC107907337	0.585
A0A1U8JJ06	glutathionyl-hydroquinone reductase YqjG-like isoform X2 OS=Gossypium hirsutum OX=3635 GN=LOC107905991	1.586
A0A1U8JJA9	transmembrane protein 87A-like OS=Gossypium hirsutum OX=3635 GN=LOC107906054	1.528
A0A1U8JJC3	AAA-ATPase At5g57480 OS=Gossypium hirsutum OX=3635 GN=LOC107907490	0.517
A0A1U8JJG3	RNA-binding KH domain-containing protein PEPPER-like isoform X2 OS=Gossypium hirsutum OX=3635 GN=LOC107907515	0.588
A0A1U8JJI6	36.4 kDa proline-rich protein-like OS=Gossypium hirsutum OX=3635 GN=LOC107907538	0.473
A0A1U8JJL7	GDSL esterase/lipase APG-like OS=Gossypium hirsutum OX=3635 GN=LOC107906128	0.264
A0A1U8JKK7	Terpene cyclase/mutase family member OS=Gossypium hirsutum OX=3635 GN=LOC107906370	0.547
A0A1U8JKN6	probable serine/threonine-protein kinase NAK OS=Gossypium hirsutum OX=3635 GN=LOC107908088	2.656
A0A1U8JL49	aspartyl protease family protein At5g10770-like OS=Gossypium hirsutum OX=3635 GN=LOC107906802	2.433
A0A1U8JL91	oligopeptide transporter 4-like OS=Gossypium hirsutum OX=3635 GN=LOC107908411	0.539
A0A1U8JLE0	Putative serine/threonine-protein kinase dyrk2 OS=Gossypium arboreum OX=29729 GN=F383_23626 PE=4 SV=1	0.659
A0A1U8JLL5	BURP domain protein RD22-like isoform X7 OS=Gossypium hirsutum OX=3635 GN=LOC107906941	0.106
A0A1U8JLS6	cationic amino acid transporter 1-like isoform X2 OS=Gossypium hirsutum OX=3635 GN=LOC107908545	2.704
A0A1U8JLT0	ras-related protein RABA2a-like OS=Gossypium hirsutum OX=3635 GN=LOC107908555	1.612
A0A1U8JM09	partner of Y14 and mago-like OS=Gossypium hirsutum OX=3635 GN=LOC107908599	0.661
A0A1U8JM29	expansin-like A1 OS=Gossypium hirsutum OX=3635 GN=LOC107908625	2.437
A0A1U8JM84	PI-PLC X-box domain-containing protein DDB_G0293730-like OS=Gossypium hirsutum OX=3635 GN=LOC107908664	0.466
A0A1U8JML9	ninja-family protein mc410-like OS=Gossypium hirsutum OX=3635 GN=LOC107907193	0.64
A0A1U8JMM2	"glucan endo-1,3-beta-glucosidase 7-like OS=Gossypium hirsutum OX=3635 GN=LOC107908776"	1.792
A0A1U8JMZ1	Glycosyltransferase OS=Gossypium hirsutum OX=3635 GN=LOC107908872	2.43
A0A1U8JN77	Carbonic anhydrase OS=Gossypium hirsutum OX=3635 GN=LOC107908930	0.345
A0A1U8JN95	"bifunctional riboflavin biosynthesis protein RIBA 1, chloroplastic-like OS=Gossypium hirsutum OX=3635 GN=LOC107908940"	2.254
A0A1U8JNA5	Plasma membrane ATPase OS=Gossypium hirsutum OX=3635 GN=LOC107907352	2.325
A0A1U8JNR6	tetraspanin-8-like OS=Gossypium hirsutum OX=3635 GN=LOC107907466	1.807
A0A1U8JNW6	tetraspanin-8-like OS=Gossypium hirsutum OX=3635 GN=LOC107909086	1.571
A0A1U8JNY1	Zinc finger (C2H2 type) family protein OS=Theobroma cacao OX=3641 GN=TCM_025249 PE=4 SV=1	0.618
A0A1U8JPQ9	tyrosine aminotransferase-like OS=Gossypium hirsutum OX=3635 GN=LOC107909272	0.551
A0A1U8JPX9	ADP-ribosylation factor 1-like OS=Gossypium hirsutum OX=3635 GN=LOC107907472	1.594
A0A1U8JQ75	Aldehyde dehydrogenase OS=Gossypium hirsutum OX=3635 GN=LOC107909433	0.64
A0A1U8JQ90	endochitinase-like OS=Gossypium hirsutum OX=3635 GN=LOC107908144	3.032
A0A1U8JQG0	GDSL esterase/lipase EXL3-like OS=Gossypium hirsutum OX=3635 GN=LOC107909470	0.249
A0A1U8JQZ8	protein WVD2-like 7 isoform X2 OS=Gossypium hirsutum OX=3635 GN=LOC107909611	0.664
A0A1U8JR03	non-functional NADPH-dependent codeinone reductase 2-like OS=Gossypium hirsutum OX=3635 GN=LOC107909615	1.532
A0A1U8JR14	major allergen Pru ar 1-like OS=Gossypium hirsutum OX=3635 GN=LOC107908518	3.132
A0A1U8JRL1	cold shock protein 2-like OS=Gossypium hirsutum OX=3635 GN=LOC107908662	0.505
A0A1U8JRL7	vinorine synthase-like OS=Gossypium hirsutum OX=3635 GN=LOC107909754	2.251
A0A1U8JRP8	aspartyl protease family protein 2-like OS=Gossypium hirsutum OX=3635 GN=LOC107909803	1.748
A0A1U8JRR8	Glyceraldehyde-3-phosphate dehydrogenase OS=Gossypium hirsutum OX=3635 GN=LOC107909816	1.724
A0A1U8JRS1	probable DNA double-strand break repair Rad50 ATPase isoform X2 OS=Gossypium hirsutum OX=3635 GN=LOC107908710	0.551
A0A1U8JSC0	"alpha,alpha-trehalose-phosphate synthase [UDP-forming] 6-like OS=Gossypium hirsutum OX=3635 GN=LOC107909970"	0.627
A0A1U8JSD1	BnaCnng06750D protein OS=Brassica napus OX=3708 GN=BnaCnng06750D PE=4 SV=1	0.586
A0A1U8JSE1	D-galacturonate reductase-like isoform X2 OS=Gossypium hirsutum OX=3635 GN=LOC107909951	0.213
A0A1U8JSQ7	UDP-galactose transporter 2-like OS=Gossypium hirsutum OX=3635 GN=LOC107908989	1.68
A0A1U8JSS5	Cysteine proteinase inhibitor OS=Gossypium hirsutum OX=3635 GN=LOC107910085	1.818
A0A1U8JST7	Endosomal targeting BRO1-like domain-containing protein isoform 2 OS=Theobroma cacao OX=3641 GN=TCM_007655 PE=4 SV=1	0.412
A0A1U8JT01	Plasma membrane isoform 1 OS=Theobroma cacao OX=3641 GN=TCM_025518 PE=4 SV=1	0.652
A0A1U8JT06	heat shock factor-binding protein 1-like OS=Gossypium hirsutum OX=3635 GN=LOC107910141	0.649
A0A1U8JT07	protein SPIRAL1-like 1 OS=Gossypium hirsutum OX=3635 GN=LOC107910145	0.63
A0A1U8JT87	isoflavone reductase-like protein OS=Gossypium hirsutum OX=3635 GN=LOC107910193	0.621
A0A1U8JTB1	allene oxide synthase-like OS=Gossypium hirsutum OX=3635 GN=LOC107910216	0.648
A0A1U8JTC5	non-specific lipid-transfer protein-like 1 OS=Gossypium hirsutum OX=3635 GN=LOC107910227	0.29
A0A1U8JTV4	WAT1-related protein OS=Gossypium hirsutum OX=3635 GN=LOC107910392	0.443
A0A1U8JU04	alcohol dehydrogenase 1-like OS=Gossypium hirsutum OX=3635 GN=LOC107910430	3.7
A0A1U8JU23	Peroxidase OS=Gossypium hirsutum OX=3635 GN=LOC107908967	2.07
A0A1U8JUB7	snakin-2-like OS=Gossypium hirsutum OX=3635 GN=LOC107910501	1.977
A0A1U8JUJ7	protein DOWNSTREAM OF FLC-like OS=Gossypium hirsutum OX=3635 GN=LOC107910583	2.147
A0A1U8JUZ3	GEM-like protein 5 OS=Gossypium hirsutum OX=3635 GN=LOC107909527	1.785
A0A1U8JV29	"1,4-alpha-glucan-branching enzyme 1, chloroplastic/amyloplastic-like isoform X1 OS=Gossypium hirsutum OX=3635 GN=LOC107910685"	0.477
A0A1U8JVC1	protein STRUBBELIG-RECEPTOR FAMILY 3-like OS=Gossypium hirsutum OX=3635 GN=LOC107909258	1.579
A0A1U8JVI5	malonyl-CoA:anthocyanidin 5-O-glucoside-6''-O-malonyltransferase-like OS=Gossypium hirsutum OX=3635 GN=LOC107910874	2.372
A0A1U8JVV7	Immunoglobulin A1 protease autotransporter OS=Gossypium arboreum OX=29729 GN=F383_24996 PE=4 SV=1	0.489
A0A1U8JW17	heterogeneous nuclear ribonucleoprotein D0-like OS=Gossypium hirsutum OX=3635 GN=LOC107912795 PE=4 SV=1	0.489
A0A1U8JW26	3-oxoacyl-[acyl-carrier-protein] reductase 4-like OS=Gossypium hirsutum OX=3635 GN=LOC107909818	1.546
A0A1U8JW47	aspartyl protease family protein 1-like OS=Gossypium hirsutum OX=3635 GN=LOC107909482	2.552
A0A1U8JW74	probable methyltransferase At1g27930 OS=Gossypium hirsutum OX=3635 GN=LOC107909846	2.833
A0A1U8JWC5	"nudix hydrolase 18, mitochondrial-like isoform X1 OS=Gossypium hirsutum OX=3635 GN=LOC107909879"	0.621
A0A1U8JWE2	21 kDa protein-like OS=Gossypium hirsutum OX=3635 GN=LOC107909897	1.612
A0A1U8JWI6	Expansin OS=Gossypium hirsutum OX=3635 GN=LOC107911276	3.904
A0A1U8JWT1	Phytochrome B OS=Gossypium arboreum OX=29729 GN=F383_21375 PE=4 SV=1	1.547
A0A1U8JWT6	long chain acyl-CoA synthetase 1-like OS=Gossypium hirsutum OX=3635 GN=LOC107910005	0.554
A0A1U8JXB3	nudix hydrolase 25 OS=Gossypium hirsutum OX=3635 GN=LOC107911549	0.636
A0A1U8JXC5	Flavin-containing monooxygenase OS=Gossypium hirsutum OX=3635 GN=LOC107911594	1.651
A0A1U8JXD6	BnaC04g56500D protein OS=Brassica napus OX=3708 GN=BnaC04g56500D PE=4 SV=1	2.471
A0A1U8JXE9	Cysteine synthase OS=Gossypium hirsutum OX=3635 GN=LOC107911578	2.102
A0A1U8JXF5	Xyloglucan endotransglucosylase/hydrolase OS=Gossypium hirsutum OX=3635 GN=LOC107911611	0.51
A0A1U8JXF9	"transketolase, chloroplastic-like OS=Gossypium hirsutum OX=3635 GN=LOC107911586"	0.526
A0A1U8JXN9	LOW QUALITY PROTEIN: probable pectinesterase/pectinesterase inhibitor 51 OS=Gossypium hirsutum OX=3635 GN=LOC107911676	1.599
A0A1U8JYC8	alcohol dehydrogenase class-P OS=Gossypium hirsutum OX=3635 GN=LOC107910426	2.099
A0A1U8JYN0	AT-hook motif nuclear-localized protein 1-like isoform X2 OS=Gossypium hirsutum OX=3635 GN=LOC107911913	0.559
A0A1U8JYR3	Pectinesterase OS=Gossypium hirsutum OX=3635 GN=LOC107911904	2.074
A0A1U8JZ45	Chaperone DnaK OS=Gossypium arboreum OX=29729 GN=F383_23595 PE=4 SV=1	0.39
A0A1U8JZ88	cytochrome b5-like OS=Gossypium hirsutum OX=3635 GN=LOC107910311	0.366
A0A1U8JZB0	"betaine aldehyde dehydrogenase 2, mitochondrial-like OS=Gossypium hirsutum OX=3635 GN=LOC107912041"	0.651
A0A1U8JZD1	calnexin homolog isoform X2 OS=Gossypium hirsutum OX=3635 GN=LOC107912059	0.244
A0A1U8JZJ2	ABC transporter A family member 2 OS=Gossypium hirsutum OX=3635 GN=LOC107912145	2.023
A0A1U8JZM6	pectinesterase 3 OS=Gossypium hirsutum OX=3635 GN=LOC107912141	1.856
A0A1U8JZQ4	"glycerol-3-phosphate acyltransferase, chloroplastic-like OS=Gossypium hirsutum OX=3635 GN=LOC107912169"	0.637
A0A1U8K114	probable D-amino acid oxidase PA4548 OS=Gossypium hirsutum OX=3635 GN=LOC107912512	1.525
A0A1U8K1H3	AT-hook motif nuclear-localized protein 9-like OS=Gossypium hirsutum OX=3635 GN=LOC107911510	0.512
A0A1U8K1I8	U-box domain-containing protein 33-like isoform X3 OS=Gossypium hirsutum OX=3635 GN=LOC107911522	1.633
A0A1U8K1J3	serine/arginine-rich splicing factor SR45-like OS=Gossypium hirsutum OX=3635 GN=LOC107911053	0.283
A0A1U8K1S9	3-hydroxyisobutyryl-CoA hydrolase-like protein 5 OS=Gossypium hirsutum OX=3635 GN=LOC107912664	0.49
A0A1U8K203	cinnamoyl-CoA reductase 2-like isoform X4 OS=Gossypium hirsutum OX=3635 GN=LOC107912758	0.387
A0A1U8K2E7	cold shock domain-containing protein 3-like OS=Gossypium hirsutum OX=3635 GN=LOC107912818	0.456
A0A1U8K2F4	endochitinase-like OS=Gossypium hirsutum OX=3635 GN=LOC107912863	0.238
A0A1U8K2V8	Peroxidase OS=Gossypium hirsutum OX=3635 GN=LOC107912929	3.402
A0A1U8K3C2	putative ripening-related protein 1 OS=Gossypium hirsutum OX=3635 GN=LOC107911977	2.985
A0A1U8K3E4	AAA-ATPase At2g18193-like isoform X2 OS=Gossypium hirsutum OX=3635 GN=LOC107913055	1.814
A0A1U8K3S2	monocopper oxidase-like protein SKS1 OS=Gossypium hirsutum OX=3635 GN=LOC107913173	2.071
A0A1U8K3S9	ATP-dependent 6-phosphofructokinase OS=Gossypium hirsutum OX=3635 GN=LOC107913191	1.582
A0A1U8K3X3	"malate dehydrogenase, chloroplastic OS=Gossypium hirsutum OX=3635 GN=LOC107912129"	1.522
A0A1U8K3Z4	protein IQ-DOMAIN 31-like OS=Gossypium hirsutum OX=3635 GN=LOC107912146	0.414
A0A1U8K452	BTB/POZ domain-containing protein At5g67385-like OS=Gossypium hirsutum OX=3635 GN=LOC107913269	0.41
A0A1U8K4N1	Dihydrodipicolinate synthase OS=Gossypium arboreum OX=29729 GN=F383_14820 PE=4 SV=1	1.538
A0A1U8K4T7	Pectinesterase OS=Gossypium hirsutum OX=3635 GN=LOC107912360	1.757
A0A1U8K544	delta(24)-sterol reductase isoform X2 OS=Gossypium hirsutum OX=3635 GN=LOC107913489	0.648
A0A1U8K548	V-type proton ATPase subunit a OS=Gossypium hirsutum OX=3635 GN=LOC107913540	1.755
A0A1U8K586	uncharacterized metal-dependent hydrolase BUsg_343-like isoform X3 OS=Gossypium hirsutum OX=3635 GN=LOC107913559	0.581
A0A1U8K5P3	BnaC06g43180D protein OS=Brassica napus OX=3708 GN=BnaC06g43180D PE=4 SV=1	0.598
A0A1U8K5P9	Sulfotransferase OS=Gossypium hirsutum OX=3635 GN=LOC107913693	2.249
A0A1U8K5T7	zinc finger BED domain-containing protein DAYSLEEPER-like isoform X2 OS=Gossypium hirsutum OX=3635 GN=LOC107912346	0.606
A0A1U8K5V5	Disease resistance protein OS=Theobroma cacao OX=3641 GN=TCM_017362 PE=4 SV=1	0.48
A0A1U8K5V9	Putative metabolite transport OS=Gossypium arboreum OX=29729 GN=F383_12040 PE=4 SV=1	2.383
A0A1U8K623	"coproporphyrinogen-III oxidase 1, chloroplastic-like OS=Gossypium hirsutum OX=3635 GN=LOC107912651"	1.828
A0A1U8K630	Plasma membrane ATPase OS=Gossypium hirsutum OX=3635 GN=LOC107913825	0.545
A0A1U8K658	4-coumarate--CoA ligase 1-like OS=Gossypium hirsutum OX=3635 GN=LOC107913823	2.221
A0A1U8K672	"alanine aminotransferase 2, mitochondrial-like OS=Gossypium hirsutum OX=3635 GN=LOC107913835"	2.346
A0A1U8K6E6	GDSL esterase/lipase APG-like OS=Gossypium hirsutum OX=3635 GN=LOC107913889	0.276
A0A1U8K6H2	coatomer subunit beta'-2-like isoform X2 OS=Gossypium hirsutum OX=3635 GN=LOC107913937	4.832
A0A1U8K6P7	heparanase-like protein 3 OS=Gossypium hirsutum OX=3635 GN=LOC107912568	0.509
A0A1U8K6X1	afadin- and alpha-actinin-binding protein-like isoform X5 OS=Gossypium hirsutum OX=3635 GN=LOC107912860	0.371
A0A1U8K7C8	"naringenin,2-oxoglutarate 3-dioxygenase-like OS=Gossypium hirsutum OX=3635 GN=LOC107912992"	0.465
A0A1U8K7F0	target of Myb protein 1-like OS=Gossypium hirsutum OX=3635 GN=LOC107914138	1.515
A0A1U8K7K4	Endoglucanase OS=Gossypium hirsutum OX=3635 GN=LOC107914187	4.337
A0A1U8K7K6	protein MICRORCHIDIA 2-like isoform X2 OS=Gossypium hirsutum OX=3635 GN=LOC107913029	0.37
A0A1U8K7X0	hypersensitive-induced response protein 1-like OS=Gossypium hirsutum OX=3635 GN=LOC107914247	0.516
A0A1U8K8D8	Histone H3 OS=Gossypium hirsutum OX=3635 GN=LOC107914366	0.545
A0A1U8K8R9	flavin-dependent oxidoreductase FOX5-like OS=Gossypium hirsutum OX=3635 GN=LOC107914480	3.682
A0A1U8K8W1	Thioredoxin OS=Gossypium hirsutum OX=3635 GN=LOC107914506	0.599
A0A1U8K914	shikimate O-hydroxycinnamoyltransferase-like OS=Gossypium hirsutum OX=3635 GN=LOC107914559	0.282
A0A1U8K929	"magnesium-transporting ATPase, P-type 1-like isoform X2 OS=Gossypium hirsutum OX=3635 GN=LOC107913405"	0.635
A0A1U8K991	binding partner of ACD11 1-like isoform X2 OS=Gossypium hirsutum OX=3635 GN=LOC107913460	0.645
A0A1U8K9A2	endochitinase EP3-like OS=Gossypium hirsutum OX=3635 GN=LOC107914622	5.468
A0A1U8K9F7	23 kDa jasmonate-induced protein-like OS=Gossypium hirsutum OX=3635 GN=LOC107914657	0.657
A0A1U8K9R0	protein TRI1-like OS=Gossypium hirsutum OX=3635 GN=LOC107913327	0.557
A0A1U8KAN4	cysteine-rich repeat secretory protein 3-like isoform X2 OS=Gossypium hirsutum OX=3635 GN=LOC107914980	0.642
A0A1U8KAQ5	probable glutathione S-transferase OS=Gossypium hirsutum OX=3635 GN=LOC107915000	4.213
A0A1U8KB28	major pollen allergen Bet v 1-A-like OS=Gossypium hirsutum OX=3635 GN=LOC107915089	2.382
A0A1U8KBL3	subtilisin-like protease SBT1.5 OS=Gossypium hirsutum OX=3635 GN=LOC107915232	2.036
A0A1U8KBM2	splicing factor U2af small subunit B-like OS=Gossypium hirsutum OX=3635 GN=LOC107915220	1.521
A0A1U8KBP7	"probable acyl-activating enzyme 18, peroxisomal isoform X4 OS=Gossypium hirsutum OX=3635 GN=LOC107914113"	0.623
A0A1U8KCD2	ras-related protein Rab7 OS=Gossypium hirsutum OX=3635 GN=LOC107914079	0.589
A0A1U8KCJ3	serine decarboxylase-like OS=Gossypium hirsutum OX=3635 GN=LOC107914114	0.624
A0A1U8KCS7	copper transport protein ATX1-like OS=Gossypium hirsutum OX=3635 GN=LOC107915689	1.66
A0A1U8KCU5	(+)-neomenthol dehydrogenase-like OS=Gossypium hirsutum OX=3635 GN=LOC107915705	1.807
A0A1U8KD39	trans-resveratrol di-O-methyltransferase-like OS=Gossypium hirsutum OX=3635 GN=LOC107915765	4.381
A0A1U8KDG4	B12D protein OS=Theobroma cacao OX=3641 GN=TCM_018951 PE=4 SV=1	3.168
A0A1U8KDH7	epidermis-specific secreted glycoprotein EP1-like OS=Gossypium hirsutum OX=3635 GN=LOC107915839	2.937
A0A1U8KDN0	"alanine--glyoxylate aminotransferase 2 homolog 1, mitochondrial OS=Gossypium hirsutum OX=3635 GN=LOC107914378"	0.613
A0A1U8KE57	DnaJ subfamily B member 12 OS=Gossypium arboreum OX=29729 GN=F383_18082 PE=4 SV=1	0.51
A0A1U8KE96	Peroxidase OS=Gossypium hirsutum OX=3635 GN=LOC107914564	1.873
A0A1U8KED8	pathogenesis-related protein STH-2-like OS=Gossypium hirsutum OX=3635 GN=LOC107916198	4.018
A0A1U8KEE7	endochitinase EP3-like OS=Gossypium hirsutum OX=3635 GN=LOC107914619	2.94
A0A1U8KEM8	protein REDUCED WALL ACETYLATION 2-like isoform X2 OS=Gossypium hirsutum OX=3635 GN=LOC107916221	1.54
A0A1U8KEZ6	Peroxidase OS=Gossypium hirsutum OX=3635 GN=LOC107916305	2.26
A0A1U8KFK1	iron-sulfur protein NUBPL OS=Gossypium hirsutum OX=3635 GN=LOC107915108	1.568
A0A1U8KFM1	histone H1-like OS=Gossypium hirsutum OX=3635 GN=LOC107915126	0.432
A0A1U8KG55	major pollen allergen Bet v 1-E-like OS=Gossypium hirsutum OX=3635 GN=LOC107915088	2.356
A0A1U8KG81	Protein IGO2 OS=Gossypium arboreum OX=29729 GN=F383_29200 PE=3 SV=1	0.586
A0A1U8KGB1	Mannose-6-phosphate isomerase OS=Gossypium hirsutum OX=3635 GN=LOC107916682	1.863
A0A1U8KGR4	heavy metal-associated isoprenylated plant protein 26-like OS=Gossypium hirsutum OX=3635 GN=LOC107916759	0.593
A0A1U8KHD3	early nodulin-75-like OS=Gossypium hirsutum OX=3635 GN=LOC107915478	3.47
A0A1U8KI18	Retrotransposon gag protein OS=Corchorus capsularis OX=210143 GN=CCACVL1_05352 PE=4 SV=1	0.309
A0A1U8KIG3	desiccation-related protein PCC13-62-like OS=Gossypium hirsutum OX=3635 GN=LOC107917403	3.663
A0A1U8KIK7	epidermis-specific secreted glycoprotein EP1-like OS=Gossypium hirsutum OX=3635 GN=LOC107915836	1.693
A0A1U8KIT3	glycine-rich cell wall structural protein-like isoform X2 OS=Gossypium hirsutum OX=3635 GN=LOC107916212	2.788
A0A1U8KJ10	Superoxide dismutase OS=Gossypium hirsutum OX=3635 GN=LOC107916272	0.514
A0A1U8KJ35	"ABC transporter D family member 2, chloroplastic OS=Gossypium arboreum OX=29729 GN=F383_21051 PE=4 SV=1"	0.291
A0A1U8KJ54	"ABC transporter D family member 2, chloroplastic OS=Gossypium arboreum OX=29729 GN=F383_21051 PE=4 SV=1"	0.544
A0A1U8KJ66	pathogen-related protein-like isoform X2 OS=Gossypium hirsutum OX=3635 GN=LOC107917783	0.371
A0A1U8KJG3	major pollen allergen Bet v 1-E-like OS=Gossypium hirsutum OX=3635 GN=LOC107916196	4.663
A0A1U8KJL6	BAHD acyltransferase DCR-like OS=Gossypium hirsutum OX=3635 GN=LOC107917823	0.29
A0A1U8KK37	kinesin-like protein FRA1 isoform X2 OS=Gossypium hirsutum OX=3635 GN=LOC107917911	0.571
A0A1U8KK65	syntaxin-121-like OS=Gossypium hirsutum OX=3635 GN=LOC107917967	2.27
A0A1U8KK89	Beta-hexosaminidase OS=Gossypium hirsutum OX=3635 GN=LOC107917939	0.583
A0A1U8KKD9	WSC domain-containing protein ARB_07867-like OS=Gossypium hirsutum OX=3635 GN=LOC107918013	0.299
A0A1U8KKE3	peroxisomal (S)-2-hydroxy-acid oxidase GLO4-like OS=Gossypium hirsutum OX=3635 GN=LOC107916411	1.868
A0A1U8KKE8	stem-specific protein TSJT1-like OS=Gossypium hirsutum OX=3635 GN=LOC107917970	1.568
A0A1U8KKG9	Gamma-glutamyl hydrolase OS=Gossypium hirsutum OX=3635 GN=LOC107918036	2.448
A0A1U8KKL4	protein BASIC PENTACYSTEINE6-like isoform X2 OS=Gossypium hirsutum OX=3635 GN=LOC107918007	0.607
A0A1U8KKM7	isoflavone reductase-like protein OS=Gossypium hirsutum OX=3635 GN=LOC107918019	0.501
A0A1U8KKV3	LRR-family protein OS=Theobroma cacao OX=3641 GN=TCM_033778 PE=4 SV=1	0.646
A0A1U8KM40	epidermis-specific secreted glycoprotein EP1-like OS=Gossypium hirsutum OX=3635 GN=LOC107917198	5.03
A0A1U8KMZ3	probable long-chain-alcohol O-fatty-acyltransferase 5 OS=Gossypium hirsutum OX=3635 GN=LOC107918750	0.584
A0A1U8KN12	Fructose-bisphosphate aldolase OS=Gossypium hirsutum OX=3635 GN=LOC107918770	1.7
A0A1U8KNR0	codeine O-demethylase-like OS=Gossypium hirsutum OX=3635 GN=LOC107919093	2.745
A0A1U8KPN7	vesicle-associated protein 4-1-like isoform X1 OS=Gossypium hirsutum OX=3635 GN=LOC107917844	0.602
A0A1U8KPQ1	pathogenesis-related protein PR-4A-like OS=Gossypium hirsutum OX=3635 GN=LOC107919510	3.308
A0A1U8KQ35	aquaporin PIP1-3-like OS=Gossypium hirsutum OX=3635 GN=LOC107917915	0.36
A0A1U8KQD2	LIM domain-containing protein WLIM2b OS=Gossypium hirsutum OX=3635 GN=LOC107919796	0.504
A0A1U8KQE0	Fiber protein Fb34 OS=Gossypium barbadense OX=3634 PE=2 SV=1	0.238
A0A1U8KQF2	villin-4-like OS=Gossypium hirsutum OX=3635 GN=LOC107919811	0.627
A0A1U8KQS9	cysteine proteinase RD21a-like OS=Gossypium hirsutum OX=3635 GN=LOC107918076	1.6
A0A1U8KR14	histidine kinase 4-like OS=Gossypium hirsutum OX=3635 GN=LOC107919969	1.987
A0A1U8KRA8	subtilisin-like protease SBT3.5 isoform X3 OS=Gossypium hirsutum OX=3635 GN=LOC107920026	0.478
A0A1U8KRR1	BnaAnng09680D protein OS=Brassica napus OX=3708 GN=BnaAnng09680D PE=4 SV=1	0.458
A0A1U8KRX5	tubulin alpha chain-like OS=Gossypium hirsutum OX=3635 GN=LOC107918679	0.642
A0A1U8KSA7	GDSL esterase/lipase At5g18430-like OS=Gossypium hirsutum OX=3635 GN=LOC107918797	0.48
A0A1U8KSB5	UDP-glucose 6-dehydrogenase OS=Gossypium hirsutum OX=3635 GN=LOC107918803	1.641
A0A1U8KSE1	CTP synthase OS=Gossypium hirsutum OX=3635 GN=LOC107920278	0.501
A0A1U8KT98	probable glutathione S-transferase OS=Gossypium hirsutum OX=3635 GN=LOC107918871	0.385
A0A1U8KTA7	GPI-anchored protein LORELEI-like OS=Gossypium hirsutum OX=3635 GN=LOC107920468	1.626
A0A1U8KTE7	pathogenesis-related protein PR-4A-like OS=Gossypium hirsutum OX=3635 GN=LOC107920491	4.004
A0A1U8KTJ1	fasciclin-like arabinogalactan protein 1 OS=Gossypium hirsutum OX=3635 GN=LOC107920524	1.873
A0A1U8KTJ8	L-ascorbate oxidase homolog OS=Gossypium hirsutum OX=3635 GN=LOC107920555	3.61
A0A1U8KTN7	histone H1-like OS=Gossypium hirsutum OX=3635 GN=LOC107920561	0.27
A0A1U8KTX7	V-type proton ATPase subunit G OS=Gossypium hirsutum OX=3635 GN=LOC107920602	1.896
A0A1U8KTY3	probable receptor-like protein kinase At5g47070 OS=Gossypium hirsutum OX=3635 GN=LOC107920645	1.532
A0A1U8KUB5	aspartate-semialdehyde dehydrogenase-like OS=Gossypium hirsutum OX=3635 GN=LOC107920710	1.57
A0A1U8KUH1	subtilisin-like protease SBT3.17 OS=Gossypium hirsutum OX=3635 GN=LOC107920771	1.646
A0A1U8KUR5	Xyloglucan endotransglucosylase/hydrolase OS=Gossypium hirsutum OX=3635 GN=LOC107919852	3.239
A0A1U8KUR6	putative BPI/LBP family protein At1g04970 OS=Gossypium hirsutum OX=3635 GN=LOC107919535	1.839
A0A1U8KUT6	Endoglucanase OS=Gossypium hirsutum OX=3635 GN=LOC107920906	2.572
A0A1U8KV47	ADP-ribosylation factor-like protein 8B isoform X2 OS=Gossypium hirsutum OX=3635 GN=LOC107920967	0.265
A0A1U8KV88	"ADP,ATP carrier protein 1, mitochondrial-like OS=Gossypium hirsutum OX=3635 GN=LOC107919810"	1.505
A0A1U8KVB7	transducin beta-like protein 2 OS=Gossypium hirsutum OX=3635 GN=LOC107921009	0.516
A0A1U8KVG8	V-type proton ATPase subunit a OS=Gossypium hirsutum OX=3635 GN=LOC107920034	1.706
A0A1U8KVI2	LOW QUALITY PROTEIN: CSC1-like protein At1g69450 OS=Gossypium hirsutum OX=3635 GN=LOC107920047	0.605
A0A1U8KVN8	Alpha-amylase OS=Gossypium hirsutum OX=3635 GN=LOC107921118	4.841
A0A1U8KVP0	adenylate kinase 4 OS=Gossypium hirsutum OX=3635 GN=LOC107921158	1.586
A0A1U8KVQ4	protein IQ-DOMAIN 31 OS=Gossypium hirsutum OX=3635 GN=LOC107920098	0.656
A0A1U8KVT3	rRNA N-glycosidase OS=Gossypium hirsutum OX=3635 GN=LOC107920125	2.001
A0A1U8KVX7	transcription factor TCP21-like OS=Gossypium hirsutum OX=3635 GN=LOC107919962	0.366
A0A1U8KW28	Lipoxygenase OS=Gossypium hirsutum OX=3635 GN=LOC107919998	1.758
A0A1U8KWJ6	Glycosyltransferase OS=Gossypium hirsutum OX=3635 GN=LOC107920122	0.54
A0A1U8KWN3	alpha-xylosidase 1-like OS=Gossypium hirsutum OX=3635 GN=LOC107920151	0.583
A0A1U8KXI5	acetyl-CoA carboxylase 1-like OS=Gossypium hirsutum OX=3635 GN=LOC107921814	0.341
A0A1U8KXM9	"pentatricopeptide repeat-containing protein At2g02980, chloroplastic-like isoform X2 OS=Gossypium hirsutum OX=3635 GN=LOC107920547"	2.197
A0A1U8KXT7	Isocitrate dehydrogenase [NADP] OS=Gossypium hirsutum OX=3635 GN=LOC107920416	0.499
A0A1U8KY46	3-phosphoinositide-dependent protein kinase 2-like OS=Gossypium hirsutum OX=3635 GN=LOC107922041	0.639
A0A1U8KY71	(+)-delta-cadinene synthase isozyme XC1 OS=Gossypium hirsutum OX=3635 GN=LOC107920688	3.735
A0A1U8KYI6	Expansin OS=Gossypium hirsutum OX=3635 GN=LOC107920574	2.129
A0A1U8KYP6	alpha-L-arabinofuranosidase 1-like OS=Gossypium hirsutum OX=3635 GN=LOC107922178	1.686
A0A1U8KYP8	aspartic proteinase-like OS=Gossypium hirsutum OX=3635 GN=LOC107922162	2.22
A0A1U8KZC5	endochitinase 2-like OS=Gossypium hirsutum OX=3635 GN=LOC107921085	5.88
A0A1U8KZD2	(+)-delta-cadinene synthase isozyme XC14 OS=Gossypium hirsutum OX=3635 GN=LOC107920806	3.871
A0A1U8KZF8	CTP synthase OS=Gossypium hirsutum OX=3635 GN=LOC107922307	0.566
A0A1U8KZK4	Telomeric repeat-binding factor 1 OS=Gossypium arboreum OX=29729 GN=F383_07643 PE=4 SV=1	0.549
A0A1U8KZP6	farnesyl pyrophosphate synthase 2-like isoform X1 OS=Gossypium hirsutum OX=3635 GN=LOC107922380	1.761
A0A1U8KZR3	cytochrome P450 734A1-like OS=Gossypium hirsutum OX=3635 GN=LOC107921208	1.615
A0A1U8KZW9	phosphoprotein ECPP44-like OS=Gossypium hirsutum OX=3635 GN=LOC107922447	1.532
A0A1U8L0C9	Protein disulfide-isomerase OS=Gossypium hirsutum OX=3635 GN=LOC107922505	1.525
A0A1U8L0M7	lysM domain-containing GPI-anchored protein 2-like OS=Gossypium hirsutum OX=3635 GN=LOC107922583	4.705
A0A1U8L0Q2	14-3-3-like protein OS=Gossypium hirsutum OX=3635 GN=LOC107922638	0.666
A0A1U8L116	cannabidiolic acid synthase-like 1 OS=Gossypium hirsutum OX=3635 GN=LOC107922719	1.81
A0A1U8L1L8	Glutaredoxin-like protein OS=Gossypium hirsutum OX=3635 GN=LOC107922836	1.591
A0A1U8L1L9	cold shock protein 2-like OS=Gossypium hirsutum OX=3635 GN=LOC107922871	0.335
A0A1U8L1R8	monosaccharide-sensing protein 2-like OS=Gossypium hirsutum OX=3635 GN=LOC107922001	0.569
A0A1U8L1Z0	RPM1-interacting protein 4-like OS=Gossypium hirsutum OX=3635 GN=LOC107922044	0.391
A0A1U8L231	villin-3-like OS=Gossypium hirsutum OX=3635 GN=LOC107922079	0.626
A0A1U8L271	L-ascorbate oxidase homolog OS=Gossypium hirsutum OX=3635 GN=LOC107922114	1.561
A0A1U8L280	CAX-interacting protein 4 OS=Gossypium hirsutum OX=3635 GN=LOC107922123	0.636
A0A1U8L289	Tight junction ZO-2 OS=Gossypium arboreum OX=29729 GN=F383_23224 PE=4 SV=1	2.298
A0A1U8L2C8	glycine-rich protein 2-like OS=Gossypium hirsutum OX=3635 GN=LOC107922150	0.541
A0A1U8L2I2	Protein yippee-like OS=Gossypium hirsutum OX=3635 GN=LOC107923130	2.143
A0A1U8L2T0	"LOW QUALITY PROTEIN: alpha-glucan water dikinase, chloroplastic-like OS=Gossypium hirsutum OX=3635 GN=LOC107922015"	1.542
A0A1U8L2Y6	cysteine proteinase RD21a-like OS=Gossypium hirsutum OX=3635 GN=LOC107922081	1.681
A0A1U8L354	inorganic phosphate transporter 1-4-like OS=Gossypium hirsutum OX=3635 GN=LOC107923394	1.559
A0A1U8L355	Myosin phosphatase Rho-interacting OS=Gossypium arboreum OX=29729 GN=F383_35792 PE=4 SV=1	0.645
A0A1U8L3F3	isoflavone reductase-like protein OS=Gossypium hirsutum OX=3635 GN=LOC107922367	0.253
A0A1U8L3L6	rac-like GTP-binding protein ARAC3 OS=Gossypium hirsutum OX=3635 GN=LOC107922248	0.656
A0A1U8L4B5	V-type proton ATPase subunit B2-like OS=Gossypium hirsutum OX=3635 GN=LOC107922407	1.591
A0A1U8L4N2	molybdate-anion transporter-like OS=Gossypium hirsutum OX=3635 GN=LOC107923900	1.601
A0A1U8L4W2	caffeoylshikimate esterase-like isoform X3 OS=Gossypium hirsutum OX=3635 GN=LOC107922765	0.402
A0A1U8L513	cytochrome P450 86A8-like OS=Gossypium hirsutum OX=3635 GN=LOC107922796	0.438
A0A1U8L5N5	Glucose-6-phosphate 1-dehydrogenase OS=Gossypium hirsutum OX=3635 GN=LOC107922783	0.593
A0A1U8L5P7	germin-like protein subfamily 2 member 4 OS=Gossypium hirsutum OX=3635 GN=LOC107923008	2.552
A0A1U8L5U2	protein RALF-like 33 OS=Gossypium hirsutum OX=3635 GN=LOC107924176	2.124
A0A1U8L6P6	nucleolin-like OS=Gossypium hirsutum OX=3635 GN=LOC107923377	0.5
A0A1U8L7C1	syntaxin-22-like isoform X2 OS=Gossypium hirsutum OX=3635 GN=LOC107924523	0.551
A0A1U8L826	glutathione S-transferase F13 OS=Gossypium hirsutum OX=3635 GN=LOC107923627	1.827
A0A1U8L871	3-hydroxyisobutyryl-CoA hydrolase-like protein 5 OS=Gossypium hirsutum OX=3635 GN=LOC107924736	0.58
A0A1U8L8Q8	GDSL esterase/lipase At5g45920-like OS=Gossypium hirsutum OX=3635 GN=LOC107924924	0.544
A0A1U8L8W6	epidermis-specific secreted glycoprotein EP1-like OS=Gossypium hirsutum OX=3635 GN=LOC107924974	1.854
A0A1U8L943	AT-hook motif nuclear-localized protein 9-like OS=Gossypium hirsutum OX=3635 GN=LOC107924108	0.551
A0A1U8L946	UDP-glucose 6-dehydrogenase OS=Gossypium hirsutum OX=3635 GN=LOC107923962	1.975
A0A1U8L990	Peroxidase OS=Gossypium hirsutum OX=3635 GN=LOC107925084	7.636
A0A1U8L9B7	alcohol dehydrogenase 1-like isoform X2 OS=Gossypium hirsutum OX=3635 GN=LOC107924007	2.351
A0A1U8L9I9	calcium permeable stress-gated cation channel 1-like OS=Gossypium hirsutum OX=3635 GN=LOC107925181	0.522
A0A1U8L9M3	Pyruvate kinase OS=Gossypium hirsutum OX=3635 GN=LOC107924049	0.354
A0A1U8L9N9	cytochrome P450 71A1-like OS=Gossypium hirsutum OX=3635 GN=LOC107924088	1.724
A0A1U8L9S9	tobamovirus multiplication protein 1-like isoform X2 OS=Gossypium hirsutum OX=3635 GN=LOC107925228	0.394
A0A1U8LA03	GDSL esterase/lipase At1g29660-like OS=Gossypium hirsutum OX=3635 GN=LOC107925296	0.32
A0A1U8LA45	histone H1-like OS=Gossypium hirsutum OX=3635 GN=LOC107924194	0.392
A0A1U8LA61	putative serine/threonine-protein kinase isoform X3 OS=Gossypium hirsutum OX=3635 GN=LOC107924204	0.612
A0A1U8LAL2	transmembrane protein 87B-like OS=Gossypium hirsutum OX=3635 GN=LOC107925460	2.132
A0A1U8LAN6	long chain acyl-CoA synthetase 2-like isoform X2 OS=Gossypium hirsutum OX=3635 GN=LOC107925470	0.602
A0A1U8LAU3	BnaA09g51150D protein OS=Brassica napus OX=3708 GN=BnaA09g51150D PE=4 SV=1	0.629
A0A1U8LAV8	secoisolariciresinol dehydrogenase-like OS=Gossypium hirsutum OX=3635 GN=LOC107925529	3.645
A0A1U8LB79	probable protein disulfide-isomerase A6 OS=Gossypium hirsutum OX=3635 GN=LOC107925657	1.636
A0A1U8LBD5	endonuclease 4-like OS=Gossypium hirsutum OX=3635 GN=LOC107924489	1.678
A0A1U8LBG5	RmlC-like cupins superfamily protein OS=Theobroma cacao OX=3641 GN=TCM_003844 PE=4 SV=1	0.603
A0A1U8LBK6	Xyloglucan endotransglucosylase/hydrolase OS=Gossypium hirsutum OX=3635 GN=LOC107924710	0.629
A0A1U8LBK7	glutathione S-transferase T1-like OS=Gossypium hirsutum OX=3635 GN=LOC107924543	1.86
A0A1U8LBT3	acetyl-CoA carboxylase 1-like OS=Gossypium hirsutum OX=3635 GN=LOC107925841	0.583
A0A1U8LBY5	glutathione transferase GST 23-like OS=Gossypium hirsutum OX=3635 GN=LOC107925898	3.192
A0A1U8LCE1	actin-binding protein-like OS=Gossypium hirsutum OX=3635 GN=LOC107924973	0.35
A0A1U8LCN9	probable methyltransferase PMT9 isoform X1 OS=Gossypium hirsutum OX=3635 GN=LOC107926074	0.662
A0A1U8LCR1	Carboxypeptidase OS=Gossypium hirsutum OX=3635 GN=LOC107926097	1.916
A0A1U8LD30	probable cinnamyl alcohol dehydrogenase 9 isoform X2 OS=Gossypium hirsutum OX=3635 GN=LOC107925008	0.334
A0A1U8LDG8	Plasma membrane ATPase OS=Gossypium hirsutum OX=3635 GN=LOC107926312	1.776
A0A1U8LDL1	Inosine-uridine preferring nucleoside hydrolase family protein isoform 1 OS=Theobroma cacao OX=3641 GN=TCM_021097 PE=4 SV=1	1.964
A0A1U8LE08	protein E6-like isoform X2 OS=Gossypium hirsutum OX=3635 GN=LOC107925267	2.79
A0A1U8LE97	Glycosyltransferase OS=Gossypium hirsutum OX=3635 GN=LOC107926548	0.408
A0A1U8LEN7	cytochrome P450 71A9-like OS=Gossypium hirsutum OX=3635 GN=LOC107926658	0.663
A0A1U8LEP0	ASC1-like protein 1 OS=Gossypium hirsutum OX=3635 GN=LOC107926687	1.576
A0A1U8LER1	protein WVD2-like 4 isoform X2 OS=Gossypium hirsutum OX=3635 GN=LOC107925651	0.513
A0A1U8LER3	Ribulose-phosphate 3-epimerase OS=Gossypium hirsutum OX=3635 GN=LOC107926703	0.621
A0A1U8LFQ3	leucoanthocyanidin dioxygenase-like OS=Gossypium hirsutum OX=3635 GN=LOC107926986	0.299
A0A1U8LGB9	Peroxidase OS=Gossypium hirsutum OX=3635 GN=LOC107927161	1.913
A0A1U8LGC0	Lactoylglutathione lyase OS=Gossypium hirsutum OX=3635 GN=LOC107927151	1.849
A0A1U8LGG8	universal stress protein A-like protein OS=Gossypium hirsutum OX=3635 GN=LOC107927184	3.13
A0A1U8LGJ2	titin homolog isoform X2 OS=Gossypium hirsutum OX=3635 GN=LOC107926033	0.359
A0A1U8LGJ8	villin-4-like OS=Gossypium hirsutum OX=3635 GN=LOC107926230	0.578
A0A1U8LGL0	subtilisin-like protease SBT2.5 OS=Gossypium hirsutum OX=3635 GN=LOC107926243	1.755
A0A1U8LGN0	respiratory burst oxidase homolog protein B-like OS=Gossypium hirsutum OX=3635 GN=LOC107927187	8.086
A0A1U8LGP4	arginine-glutamic acid dipeptide repeats protein-like OS=Gossypium hirsutum OX=3635 GN=LOC107926067	0.639
A0A1U8LGU5	"Lon protease homolog, mitochondrial OS=Gossypium hirsutum OX=3635 GN=LOC107927293"	0.657
A0A1U8LGU6	2-methylene-furan-3-one reductase-like OS=Gossypium hirsutum OX=3635 GN=LOC107926100	0.522
A0A1U8LGV2	syntaxin-51-like OS=Gossypium hirsutum OX=3635 GN=LOC107926302	0.619
A0A1U8LGZ3	Xyloglucan endotransglucosylase/hydrolase OS=Gossypium hirsutum OX=3635 GN=LOC107926340	2.022
A0A1U8LH40	F-actin-capping protein subunit alpha-like OS=Gossypium hirsutum OX=3635 GN=LOC107927298	0.468
A0A1U8LH60	lipoxygenase homology domain-containing protein 1-like isoform X2 OS=Gossypium hirsutum OX=3635 GN=LOC107926222	2.762
A0A1U8LHH0	bifunctional epoxide hydrolase 2-like OS=Gossypium hirsutum OX=3635 GN=LOC107926277	1.768
A0A1U8LHL3	probable calcium-binding protein CML49 OS=Gossypium hirsutum OX=3635 GN=LOC107926337	1.638
A0A1U8LHT1	tetrahydrocannabinolic acid synthase-like OS=Gossypium hirsutum OX=3635 GN=LOC107927518	3.92
A0A1U8LHU6	trihelix transcription factor ASIL2-like OS=Gossypium hirsutum OX=3635 GN=LOC107927601	0.627
A0A1U8LHV1	Uricase OS=Gossypium hirsutum OX=3635 GN=LOC107927605	2.079
A0A1U8LI11	beta-D-xylosidase 1-like OS=Gossypium hirsutum OX=3635 GN=LOC107926474	3.265
A0A1U8LI40	ABC transporter G family member 11 OS=Gossypium hirsutum OX=3635 GN=LOC107926695	0.199
A0A1U8LI49	Mitogen-activated protein kinase OS=Gossypium hirsutum OX=3635 GN=LOC107927706	1.565
A0A1U8LI80	probable glutathione S-transferase OS=Gossypium hirsutum OX=3635 GN=LOC107927711	2.458
A0A1U8LIE3	serine incorporator 3 OS=Gossypium hirsutum OX=3635 GN=LOC107927773	0.665
A0A1U8LIL8	chalcone synthase 1 OS=Gossypium hirsutum OX=3635 GN=LOC107927759	0.591
A0A1U8LIR2	"endo-1,31,4-beta-D-glucanase-like OS=Gossypium hirsutum OX=3635 GN=LOC107927792"	0.506
A0A1U8LJ11	Baculoviral IAP repeat-containing 1b OS=Gossypium arboreum OX=29729 GN=F383_00643 PE=4 SV=1	1.515
A0A1U8LJ49	autophagy-related protein 2-like OS=Gossypium hirsutum OX=3635 GN=LOC107927928	2.731
A0A1U8LJ75	Carboxypeptidase OS=Gossypium hirsutum OX=3635 GN=LOC107927032	2.011
A0A1U8LJ91	Cysteine proteinase inhibitor OS=Gossypium hirsutum OX=3635 GN=LOC107928032	1.731
A0A1U8LJC7	probable carboxylesterase 13 OS=Gossypium hirsutum OX=3635 GN=LOC107927987	0.559
A0A1U8LJL2	lysosomal Pro-X carboxypeptidase-like OS=Gossypium hirsutum OX=3635 GN=LOC107928126	1.52
A0A1U8LJM7	secoisolariciresinol dehydrogenase-like OS=Gossypium hirsutum OX=3635 GN=LOC107928141	2.909
A0A1U8LJQ3	syntaxin-43-like isoform X2 OS=Gossypium hirsutum OX=3635 GN=LOC107927165	0.579
A0A1U8LJR4	aspartic proteinase nepenthesin-2-like OS=Gossypium hirsutum OX=3635 GN=LOC107928146	1.563
A0A1U8LJR6	universal stress protein A-like protein OS=Gossypium hirsutum OX=3635 GN=LOC107927177	2.627
A0A1U8LJT4	probable LRR receptor-like serine/threonine-protein kinase At1g07650 isoform X3 OS=Gossypium hirsutum OX=3635 GN=LOC107928097	1.881
A0A1U8LJW3	NDR1/HIN1-Like protein 3-like OS=Gossypium hirsutum OX=3635 GN=LOC107928134	3.597
A0A1U8LJW5	probable DNA double-strand break repair Rad50 ATPase OS=Gossypium hirsutum OX=3635 GN=LOC107928226	0.427
A0A1U8LK20	Carboxypeptidase OS=Gossypium hirsutum OX=3635 GN=LOC107928248	0.456
A0A1U8LK63	REF/SRPP-like protein At3g05500 OS=Gossypium hirsutum OX=3635 GN=LOC107927287	0.642
A0A1U8LKN0	omega-hydroxypalmitate O-feruloyl transferase-like OS=Gossypium hirsutum OX=3635 GN=LOC107928379	0.632
A0A1U8LKR0	"peroxisomal 2,4-dienoyl-CoA reductase-like OS=Gossypium hirsutum OX=3635 GN=LOC107928399"	0.656
A0A1U8LKT7	RPM1-interacting protein 4-like isoform X2 OS=Gossypium hirsutum OX=3635 GN=LOC107927263	0.302
A0A1U8LKX8	UDP-glucose 4-epimerase 2-like OS=Gossypium hirsutum OX=3635 GN=LOC107927530	1.548
A0A1U8LL10	"alanine--glyoxylate aminotransferase 2 homolog 3, mitochondrial-like isoform X2 OS=Gossypium hirsutum OX=3635 GN=LOC107928548"	0.495
A0A1U8LL49	heat shock 70 kDa protein 8-like OS=Gossypium hirsutum OX=3635 GN=LOC107928561	0.605
A0A1U8LL75	sugar transport protein 13 OS=Gossypium hirsutum OX=3635 GN=LOC107928606	2.213
A0A1U8LL79	protein IQ-DOMAIN 14-like OS=Gossypium hirsutum OX=3635 GN=LOC107928536	0.562
A0A1U8LLA8	probable glutathione S-transferase OS=Gossypium hirsutum OX=3635 GN=LOC107927646	2.978
A0A1U8LLE7	Non-specific lipid-transfer protein OS=Gossypium hirsutum OX=3635 GN=LOC107928594	0.637
A0A1U8LLN9	probable polygalacturonase OS=Gossypium hirsutum OX=3635 GN=LOC107928776	1.547
A0A1U8LLS4	kynurenine formamidase-like isoform X1 OS=Gossypium hirsutum OX=3635 GN=LOC107928802	0.274
A0A1U8LLX2	expansin-like A1 OS=Gossypium hirsutum OX=3635 GN=LOC107927838	1.983
A0A1U8LLZ5	copper transport protein ATX1-like OS=Gossypium hirsutum OX=3635 GN=LOC107927608	1.937
A0A1U8LM42	Peroxidase OS=Gossypium hirsutum OX=3635 GN=LOC107928809	1.79
A0A1U8LMG8	PI-PLC X-box domain-containing protein DDB_G0293730-like OS=Gossypium hirsutum OX=3635 GN=LOC107928020	0.172
A0A1U8LMN0	1-aminocyclopropane-1-carboxylate oxidase homolog 1-like OS=Gossypium hirsutum OX=3635 GN=LOC107929035	4.325
A0A1U8LMQ8	probable prolyl 4-hydroxylase 4 OS=Gossypium hirsutum OX=3635 GN=LOC107929006	1.69
A0A1U8LMV7	Fructose-bisphosphate aldolase OS=Gossypium hirsutum OX=3635 GN=LOC107928128	0.492
A0A1U8LN77	translocon-associated protein subunit alpha-like OS=Gossypium hirsutum OX=3635 GN=LOC107927996	1.678
A0A1U8LN82	acylamino-acid-releasing enzyme-like OS=Gossypium hirsutum OX=3635 GN=LOC107929144	0.641
A0A1U8LN99	probable receptor-like protein kinase At1g11050 OS=Gossypium hirsutum OX=3635 GN=LOC107928009	1.623
A0A1U8LNC1	transmembrane emp24 domain-containing protein p24beta3-like OS=Gossypium hirsutum OX=3635 GN=LOC107929172	1.552
A0A1U8LNW2	nitronate monooxygenase-like OS=Gossypium hirsutum OX=3635 GN=LOC107929388	1.792
A0A1U8LNW7	taxadien-5-alpha-ol O-acetyltransferase-like OS=Gossypium hirsutum OX=3635 GN=LOC107929395	0.366
A0A1U8LNX7	protein WVD2-like 4 isoform X2 OS=Gossypium hirsutum OX=3635 GN=LOC107928206	0.416
A0A1U8LP04	momilactone A synthase-like OS=Gossypium hirsutum OX=3635 GN=LOC107928231	3.51
A0A1U8LP47	isoflavone reductase homolog OS=Gossypium hirsutum OX=3635 GN=LOC107929415	4.384
A0A1U8LP91	Lipoxygenase OS=Gossypium hirsutum OX=3635 GN=LOC107928543	0.66
A0A1U8LPL8	caffeic acid 3-O-methyltransferase-like isoform X1 OS=Gossypium hirsutum OX=3635 GN=LOC107929579	3.748
A0A1U8LPM4	NAC domain-containing protein 14-like isoform X5 OS=Gossypium hirsutum OX=3635 GN=LOC107929553	0.663
A0A1U8LPR4	2-alkenal reductase (NADP(+)-dependent)-like OS=Gossypium hirsutum OX=3635 GN=LOC107929607	0.5
A0A1U8LQG5	AT-hook motif nuclear-localized protein 1-like OS=Gossypium hirsutum OX=3635 GN=LOC107929813	0.495
A0A1U8LQN9	copper transporter 5.1-like OS=Gossypium hirsutum OX=3635 GN=LOC107929845	1.516
A0A1U8LR00	protein trichome birefringence-like 16 isoform X2 OS=Gossypium hirsutum OX=3635 GN=LOC107929940	1.853
A0A1U8LR29	3-hydroxy-3-methylglutaryl coenzyme A synthase OS=Gossypium hirsutum OX=3635 GN=LOC107929989	0.486
A0A1U8LRA2	protein HOTHEAD-like isoform X2 OS=Gossypium hirsutum OX=3635 GN=LOC107930056	0.625
A0A1U8LRB6	leucoanthocyanidin dioxygenase-like OS=Gossypium hirsutum OX=3635 GN=LOC107930062	0.366
A0A1U8LRD2	cellulose synthase A catalytic subunit 1 [UDP-forming]-like isoform X3 OS=Gossypium hirsutum OX=3635 GN=LOC107929134	0.37
A0A1U8LRJ5	thaumatin-like protein OS=Gossypium hirsutum OX=3635 GN=LOC107929189	7.147
A0A1U8LS58	Phosphomannomutase OS=Gossypium hirsutum OX=3635 GN=LOC107929190	1.83
A0A1U8LSH3	Remorin family protein OS=Theobroma cacao OX=3641 GN=TCM_005370 PE=4 SV=1	0.455
A0A1U8LSP6	basic 7S globulin 2-like OS=Gossypium hirsutum OX=3635 GN=LOC107930417	5.425
A0A1U8LSP7	inactive tetrahydrocannabinolic acid synthase-like OS=Gossypium hirsutum OX=3635 GN=LOC107929508	1.836
A0A1U8LSR7	tropinone reductase-like 3 OS=Gossypium hirsutum OX=3635 GN=LOC107930440	1.826
A0A1U8LSX1	upstream activation factor subunit UAF30-like OS=Gossypium hirsutum OX=3635 GN=LOC107929407	0.629
A0A1U8LSZ7	caffeic acid 3-O-methyltransferase-like OS=Gossypium hirsutum OX=3635 GN=LOC107929580	2.491
A0A1U8LTH9	caffeic acid 3-O-methyltransferase-like OS=Gossypium hirsutum OX=3635 GN=LOC107929578	3.994
A0A1U8LU66	thaumatin-like protein isoform X1 OS=Gossypium hirsutum OX=3635 GN=LOC107930875	1.974
A0A1U8LUM5	protein ASPARTIC PROTEASE IN GUARD CELL 1 OS=Gossypium hirsutum OX=3635 GN=LOC107931027	0.536
A0A1U8LUV4	auxin transporter-like protein 2 OS=Gossypium hirsutum OX=3635 GN=LOC107930145	0.663
A0A1U8LVC4	UDP-glucuronic acid decarboxylase 2-like OS=Gossypium hirsutum OX=3635 GN=LOC107931230	2.05
A0A1U8LVN0	Amine oxidase OS=Gossypium hirsutum OX=3635 GN=LOC107931297	1.58
A0A1U8LWS5	Acetyl-coenzyme A synthetase OS=Gossypium hirsutum OX=3635 GN=LOC107931605	1.876
A0A1U8LWU3	Glycosyltransferase OS=Gossypium hirsutum OX=3635 GN=LOC107931581	0.344
A0A1U8LX18	protein TONNEAU 1b-like OS=Gossypium hirsutum OX=3635 GN=LOC107930744	0.627
A0A1U8LX51	metal transporter Nramp3-like OS=Gossypium hirsutum OX=3635 GN=LOC107931677	3.198
A0A1U8LXC4	salicylic acid-binding protein 2-like OS=Gossypium hirsutum OX=3635 GN=LOC107931799	2.154
A0A1U8LY10	germin-like protein subfamily 1 member 14 OS=Gossypium hirsutum OX=3635 GN=LOC107932042	4.647
A0A1U8LY23	thaumatin-like protein OS=Gossypium hirsutum OX=3635 GN=LOC107930913	5.46
A0A1U8LY62	cytidine deaminase 1-like OS=Gossypium hirsutum OX=3635 GN=LOC107932068	0.419
A0A1U8LYG2	protein EXORDIUM-like 3 OS=Gossypium hirsutum OX=3635 GN=LOC107931034	0.185
A0A1U8LYP3	pathogenesis-related protein 1-like OS=Gossypium hirsutum OX=3635 GN=LOC107932227	5.116
A0A1U8LYS8	1-aminocyclopropane-1-carboxylate oxidase 1 OS=Gossypium hirsutum OX=3635 GN=LOC107932273	5.457
A0A1U8LYX2	importin-11-like OS=Gossypium hirsutum OX=3635 GN=LOC107931263	0.51
A0A1U8LZN9	Histone H2B OS=Gossypium hirsutum OX=3635 GN=LOC107932495	0.569
A0A1U8LZS2	Peroxidase OS=Gossypium hirsutum OX=3635 GN=LOC107932531	2.24
A0A1U8M0E4	Chalcone-flavonone isomerase family protein OS=Gossypium hirsutum OX=3635 GN=LOC107931587	0.296
A0A1U8M168	"calcium-transporting ATPase 1, endoplasmic reticulum-type-like OS=Gossypium hirsutum OX=3635 GN=LOC107932929"	1.765
A0A1U8M1A2	bark storage protein A-like OS=Gossypium hirsutum OX=3635 GN=LOC107932960	2.042
A0A1U8M1G6	casein kinase I-like OS=Gossypium hirsutum OX=3635 GN=LOC107932064	0.663
A0A1U8M254	"glucan endo-1,3-beta-glucosidase OS=Gossypium hirsutum OX=3635 GN=LOC107933200"	3.907
A0A1U8M2E2	Diphosphomevalonate decarboxylase OS=Gossypium hirsutum OX=3635 GN=LOC107933302	1.642
A0A1U8M2H7	L-ascorbate oxidase homolog OS=Gossypium hirsutum OX=3635 GN=LOC107932294	2.74
A0A1U8M2J4	ubiquitin receptor RAD23c-like OS=Gossypium hirsutum OX=3635 GN=LOC107932403	0.648
A0A1U8M2Q3	polygalacturonase At1g48100-like OS=Gossypium hirsutum OX=3635 GN=LOC107933386	0.507
A0A1U8M2S5	non-specific lipid transfer protein GPI-anchored 1-like OS=Gossypium hirsutum OX=3635 GN=LOC107933394	0.32
A0A1U8M2U4	tryptophan aminotransferase-related protein 4-like OS=Gossypium hirsutum OX=3635 GN=LOC107933415	2.007
A0A1U8M2V2	Tryptophan synthase alpha chain OS=Gossypium arboreum OX=29729 GN=F383_22343 PE=4 SV=1	1.651
A0A1U8M398	vinorine synthase-like OS=Gossypium hirsutum OX=3635 GN=LOC107933551	2.433
A0A1U8M399	"CBS domain-containing protein CBSX1, chloroplastic-like isoform X3 OS=Gossypium hirsutum OX=3635 GN=LOC107932583"	0.646
A0A1U8M3D4	thaumatin-like protein 1b isoform X4 OS=Gossypium hirsutum OX=3635 GN=LOC107932597	0.438
A0A1U8M3H5	metal transporter Nramp3-like OS=Gossypium hirsutum OX=3635 GN=LOC107932570	2.226
A0A1U8M3J6	snakin-2-like isoform X2 OS=Gossypium hirsutum OX=3635 GN=LOC107933623	2.121
A0A1U8M3T2	putative invertase inhibitor OS=Gossypium hirsutum OX=3635 GN=LOC107933694	0.57
A0A1U8M3U2	mediator-associated protein 1-like OS=Gossypium hirsutum OX=3635 GN=LOC107932671	1.562
A0A1U8M3Y2	protein SIEVE ELEMENT OCCLUSION B-like OS=Gossypium hirsutum OX=3635 GN=LOC107933740	4.267
A0A1U8M455	T31J12.3 protein OS=Arabidopsis thaliana OX=3702 GN=At1g09310 PE=1 SV=1	0.464
A0A1U8M496	phosphoenolpyruvate carboxykinase [ATP]-like OS=Gossypium hirsutum OX=3635 GN=LOC107933840	2.423
A0A1U8M4Q6	"protein CbxX, chromosomal-like OS=Gossypium hirsutum OX=3635 GN=LOC107933010"	1.643
A0A1U8M510	villin-2-like OS=Gossypium hirsutum OX=3635 GN=LOC107934027	0.572
A0A1U8M558	probable prolyl 4-hydroxylase 9 OS=Gossypium hirsutum OX=3635 GN=LOC107934108	1.882
A0A1U8M560	"Plant basic secretory protein (BSP) family protein, putative OS=Theobroma cacao OX=3641 GN=TCM_007154 PE=4 SV=1"	3.669
A0A1U8M5M2	enolase-like OS=Gossypium hirsutum OX=3635 GN=LOC107933168	1.601
A0A1U8M685	acid beta-fructofuranosidase-like OS=Gossypium hirsutum OX=3635 GN=LOC107933480	0.654
A0A1U8M6E0	very-long-chain enoyl-CoA reductase OS=Gossypium hirsutum OX=3635 GN=LOC107934412	0.527
A0A1U8M6J8	selenium-binding protein 2-like OS=Gossypium hirsutum OX=3635 GN=LOC107934466	3.355
A0A1U8M6Y2	Histone H4 OS=Gossypium hirsutum OX=3635 GN=LOC107934611	0.623
A0A1U8M752	Glutathione peroxidase OS=Gossypium hirsutum OX=3635 GN=LOC107933606	2.63
A0A1U8M7J9	phosphoenolpyruvate carboxylase 4-like OS=Gossypium hirsutum OX=3635 GN=LOC107934792	0.572
A0A1U8M7L7	transcription factor BIM2-like isoform X2 OS=Gossypium hirsutum OX=3635 GN=LOC107934764	0.506
A0A1U8M7N1	dCTP pyrophosphatase 1-like OS=Gossypium hirsutum OX=3635 GN=LOC107934822	0.414
A0A1U8M7U0	histidine-containing phosphotransfer protein 1-like OS=Gossypium hirsutum OX=3635 GN=LOC107933828	0.505
A0A1U8M7X5	Helicase required for RNAi-mediated heterochromatin assembly 1 OS=Gossypium arboreum OX=29729 GN=F383_30613 PE=4 SV=1	0.092
A0A1U8M876	Peptidase M50 OS=Corchorus olitorius OX=93759 GN=COLO4_25627 PE=4 SV=1	0.535
A0A1U8M8N8	Beta-galactosidase OS=Gossypium hirsutum OX=3635 GN=LOC107935083	1.611
A0A1U8M8W2	Kinesin-like protein OS=Gossypium hirsutum OX=3635 GN=LOC107935154	0.658
A0A1U8M8Y2	probable carbohydrate esterase At4g34215 OS=Gossypium hirsutum OX=3635 GN=LOC107934153	0.62
A0A1U8M946	protein TONNEAU 1a-like OS=Gossypium hirsutum OX=3635 GN=LOC107934208	0.658
A0A1U8M9Q5	probable indole-3-acetic acid-amido synthetase GH3.6 OS=Gossypium hirsutum OX=3635 GN=LOC107934422	2.257
A0A1U8MA48	cytochrome P450 82A3-like OS=Gossypium hirsutum OX=3635 GN=LOC107935601	1.767
A0A1U8MA95	allene oxide synthase-like OS=Gossypium hirsutum OX=3635 GN=LOC107935572	1.621
A0A1U8MAI5	Gb:AAF02129.1 isoform 1 OS=Theobroma cacao OX=3641 GN=TCM_022831 PE=4 SV=1	2.431
A0A1U8MB41	cannabidiolic acid synthase-like 2 OS=Gossypium hirsutum OX=3635 GN=LOC107934808	1.875
A0A1U8MBF6	trans-cinnamate 4-monooxygenase-like OS=Gossypium hirsutum OX=3635 GN=LOC107936045	0.622
A0A1U8MBN1	nematode resistance protein-like HSPRO2 OS=Gossypium hirsutum OX=3635 GN=LOC107934984	1.529
A0A1U8MBW2	mediator-associated protein 1-like OS=Gossypium hirsutum OX=3635 GN=LOC107936159	1.547
A0A1U8MBY3	ATP-citrate synthase beta chain protein 2-like OS=Gossypium hirsutum OX=3635 GN=LOC107936128	0.509
A0A1U8MC10	dihydroflavonol-4-reductase-like OS=Gossypium hirsutum OX=3635 GN=LOC107935085	0.559
A0A1U8MC29	Peroxidase OS=Gossypium hirsutum OX=3635 GN=LOC107935094	1.878
A0A1U8MCC9	Peroxidase OS=Gossypium hirsutum OX=3635 GN=LOC107936315	2.175
A0A1U8MCE2	probable methyltransferase PMT3 OS=Gossypium hirsutum OX=3635 GN=LOC107936254	1.512
A0A1U8MCH3	Superoxide dismutase [Cu-Zn] OS=Gossypium hirsutum OX=3635 GN=LOC107935219	0.516
A0A1U8MCI9	cellulose synthase-like protein E1 OS=Gossypium hirsutum OX=3635 GN=LOC107935220	0.528
A0A1U8MCK4	UPF0664 stress-induced protein C29B12.11c OS=Gossypium hirsutum OX=3635 GN=LOC107936318	0.627
A0A1U8MCK5	bifunctional UDP-glucose 4-epimerase and UDP-xylose 4-epimerase 1-like OS=Gossypium hirsutum OX=3635 GN=LOC107936375	1.605
A0A1U8MCM9	thaumatin-like protein 1 OS=Gossypium hirsutum OX=3635 GN=LOC107936393	4.215
A0A1U8MD79	UDP-Glycosyltransferase superfamily protein OS=Theobroma cacao OX=3641 GN=TCM_000298 PE=4 SV=1	1.687
A0A1U8MDK0	dynamin-related protein 4C-like OS=Gossypium hirsutum OX=3635 GN=LOC107935544	2.224
A0A1U8MDN1	BnaC01g21610D protein OS=Brassica napus OX=3708 GN=BnaC01g21610D PE=4 SV=1	0.567
A0A1U8MDT3	oxalate--CoA ligase-like OS=Gossypium hirsutum OX=3635 GN=LOC107936698	2.076
A0A1U8MDU9	probable low-specificity L-threonine aldolase 1 OS=Gossypium hirsutum OX=3635 GN=LOC107936772	1.774
A0A1U8ME25	tetrahydrocannabinolic acid synthase-like OS=Gossypium hirsutum OX=3635 GN=LOC107936820	2.151
A0A1U8ME67	protein PXR1-like isoform X2 OS=Gossypium hirsutum OX=3635 GN=LOC107936861	3.387
A0A1U8MEA3	Hexosyltransferase OS=Gossypium hirsutum OX=3635 GN=LOC107936849	1.532
A0A1U8MEY1	glycerol kinase-like OS=Gossypium hirsutum OX=3635 GN=LOC107937084	1.601
A0A1U8MF08	Glutamate decarboxylase OS=Gossypium hirsutum OX=3635 GN=LOC107937128	1.951
A0A1U8MF23	Ferritin OS=Gossypium hirsutum OX=3635 GN=LOC107937064	0.633
A0A1U8MFM7	Peroxidase OS=Gossypium hirsutum OX=3635 GN=LOC107936187	5.299
A0A1U8MFX5	PTI1-like tyrosine-protein kinase At3g15890 OS=Gossypium hirsutum OX=3635 GN=LOC107937377	0.583
A0A1U8MG00	upstream activation factor subunit UAF30-like OS=Gossypium hirsutum OX=3635 GN=LOC107936316	0.526
A0A1U8MGC7	non-functional NADPH-dependent codeinone reductase 2-like OS=Gossypium hirsutum OX=3635 GN=LOC107937490	4.023
A0A1U8MGI6	phosphoprotein ECPP44-like OS=Gossypium hirsutum OX=3635 GN=LOC107937569	2.034
A0A1U8MGK1	V-type proton ATPase subunit F isoform X3 OS=Gossypium hirsutum OX=3635 GN=LOC107936497	2.01
A0A1U8MGP0	peptidyl-prolyl cis-trans isomerase CYP63-like isoform X2 OS=Gossypium hirsutum OX=3635 GN=LOC107936501	1.603
A0A1U8MH94	3'-N-debenzoyl-2'-deoxytaxol N-benzoyltransferase-like OS=Gossypium hirsutum OX=3635 GN=LOC107936677	2.131
A0A1U8MHD1	Glutathione peroxidase OS=Gossypium hirsutum OX=3635 GN=LOC107936710	1.83
A0A1U8MHE1	Peroxidase OS=Gossypium hirsutum OX=3635 GN=LOC107936721	4.914
A0A1U8MHF3	sugar carrier protein C-like OS=Gossypium hirsutum OX=3635 GN=LOC107937779	2.079
A0A1U8MHK2	benzyl alcohol O-benzoyltransferase-like OS=Gossypium hirsutum OX=3635 GN=LOC107937814	0.459
A0A1U8MHM2	probable acyl-activating enzyme 2 OS=Gossypium hirsutum OX=3635 GN=LOC107937832	0.565
A0A1U8MHN3	Phospholipase D OS=Gossypium hirsutum OX=3635 GN=LOC107937835	0.506
A0A1U8MHQ0	transmembrane protein 97-like OS=Gossypium hirsutum OX=3635 GN=LOC107937853	7.126
A0A1U8MHX4	selenoprotein H-like OS=Gossypium hirsutum OX=3635 GN=LOC107937910	0.623
A0A1U8MI03	Calcium-binding mitochondrial carrier SCaMC-1 OS=Gossypium arboreum OX=29729 GN=F383_07020 PE=4 SV=1	1.676
A0A1U8MI52	probable aquaporin PIP2-8 OS=Gossypium hirsutum OX=3635 GN=LOC107936977	0.148
A0A1U8MIF5	pyruvate decarboxylase 2-like OS=Gossypium hirsutum OX=3635 GN=LOC107937060	1.771
A0A1U8MIN5	GEM-like protein 5 OS=Gossypium hirsutum OX=3635 GN=LOC107937115	3.9
A0A1U8MIQ7	endoplasmin homolog OS=Gossypium hirsutum OX=3635 GN=LOC107938130	1.55
A0A1U8MIR8	Alpha-amylase OS=Gossypium hirsutum OX=3635 GN=LOC107938137	2.434
A0A1U8MIY2	asparagine synthetase [glutamine-hydrolyzing] 1-like OS=Gossypium hirsutum OX=3635 GN=LOC107937167	0.579
A0A1U8MIZ5	anthocyanidin reductase-like OS=Gossypium hirsutum OX=3635 GN=LOC107938221	0.175
A0A1U8MJ75	cinnamyl alcohol dehydrogenase 1-like OS=Gossypium hirsutum OX=3635 GN=LOC107938254	2.338
A0A1U8MJA7	5-methyltetrahydropteroyltriglutamate-- homocysteine methyltransferase-like OS=Gossypium hirsutum OX=3635 GN=LOC107937302	1.761
A0A1U8MJE0	probable xyloglucan glycosyltransferase 12 OS=Gossypium hirsutum OX=3635 GN=LOC107938322	1.684
A0A1U8MKA5	subtilisin-like protease SBT5.6 OS=Gossypium hirsutum OX=3635 GN=LOC107938543	0.494
A0A1U8MKK2	microtubule-associated protein TORTIFOLIA1-like OS=Gossypium hirsutum OX=3635 GN=LOC107938643	0.646
A0A1U8MKS1	"galactolipase DONGLE, chloroplastic-like OS=Gossypium hirsutum OX=3635 GN=LOC107938710"	3.371
A0A1U8MKV8	O-fucosyltransferase family protein OS=Theobroma cacao OX=3641 GN=TCM_028039 PE=4 SV=1	0.666
A0A1U8MLA5	protein STRICTOSIDINE SYNTHASE-LIKE 5-like OS=Gossypium hirsutum OX=3635 GN=LOC107937833	0.626
A0A1U8MLB0	ubiquitin domain-containing protein DSK2b-like isoform X1 OS=Gossypium hirsutum OX=3635 GN=LOC107937837	0.418
A0A1U8MLC7	ABC1 family protein OS=Theobroma cacao OX=3641 GN=TCM_036786 PE=4 SV=1	1.548
A0A1U8MLD1	dihydroflavonol-4-reductase-like OS=Gossypium hirsutum OX=3635 GN=LOC107938889	0.472
A0A1U8MLU2	random slug protein 5-like isoform X3 OS=Gossypium hirsutum OX=3635 GN=LOC107938037	0.238
A0A1U8MLX6	Non-lysosomal glucosylceramidase OS=Gossypium hirsutum OX=3635 GN=LOC107939039	1.542
A0A1U8MM36	caffeoyl-CoA O-methyltransferase OS=Gossypium hirsutum OX=3635 GN=LOC107938099	3.354
A0A1U8MM66	selenium-binding protein 2-like OS=Gossypium hirsutum OX=3635 GN=LOC107939151	3.778
A0A1U8MMK0	21 kDa seed protein-like OS=Gossypium hirsutum OX=3635 GN=LOC107938174	4.533
A0A1U8MMW2	cytochrome P450 CYP749A22-like OS=Gossypium hirsutum OX=3635 GN=LOC107939361	0.524
A0A1U8MN15	cytosolic endo-beta-N-acetylglucosaminidase 1-like isoform X2 OS=Gossypium hirsutum OX=3635 GN=LOC107939385	3.098
A0A1U8MP71	protein CDI-like OS=Gossypium hirsutum OX=3635 GN=LOC107938690	2.289
A0A1U8MP98	Carbonic anhydrase OS=Gossypium hirsutum OX=3635 GN=LOC107939781	3.804
A0A1U8MQC6	putative defensin-like protein 263 OS=Gossypium hirsutum OX=3635 GN=LOC107940128	0.35
A0A1U8MR28	caffeic acid 3-O-methyltransferase-like OS=Gossypium hirsutum OX=3635 GN=LOC107940407	3.846
A0A1U8MR32	dynamin-related protein 4C-like isoform X2 OS=Gossypium hirsutum OX=3635 GN=LOC107940357	2.019
A0A1U8MR82	protein RNA-directed DNA methylation 3-like isoform X2 OS=Gossypium hirsutum OX=3635 GN=LOC107939271	0.613
A0A1U8MRA2	Pantothenate kinase 2 OS=Gossypium hirsutum OX=3635 GN=LOC107939287	0.612
A0A1U8MRC4	Carbonic anhydrase OS=Gossypium hirsutum OX=3635 GN=LOC107939279	7.424
A0A1U8MRG7	Carbonic anhydrase OS=Gossypium hirsutum OX=3635 GN=LOC107939310	4.369
A0A1U8MRY8	protein NRT1/ PTR FAMILY 4.5-like OS=Gossypium hirsutum OX=3635 GN=LOC107940680	3.326
A0A1U8MS53	beta-xylosidase/alpha-L-arabinofuranosidase 2-like OS=Gossypium hirsutum OX=3635 GN=LOC107940742	0.399
A0A1U8MSB0	subtilisin-like protease SBT1.9 OS=Gossypium hirsutum OX=3635 GN=LOC107940794	1.639
A0A1U8MSB7	apoptosis-inducing factor homolog A-like OS=Gossypium hirsutum OX=3635 GN=LOC107940777	2.441
A0A1U8MSC5	WUSCHEL-related homeobox 13-like OS=Gossypium hirsutum OX=3635 GN=LOC107939611	1.558
A0A1U8MSF4	Chalcone-flavonone isomerase family protein OS=Gossypium hirsutum OX=3635 GN=LOC107940815	0.356
A0A1U8MSJ7	probable NAD(P)H dehydrogenase (Quinone) FQR1-like 1 OS=Gossypium hirsutum OX=3635 GN=LOC107940870	0.16
A0A1U8MSK8	PRA1 family protein OS=Gossypium hirsutum OX=3635 GN=LOC107939675	2.898
A0A1U8MSL0	probable mannitol dehydrogenase OS=Gossypium hirsutum OX=3635 GN=LOC107940871	0.511
A0A1U8MSU2	Embryo-specific protein 3 isoform 1 OS=Theobroma cacao OX=3641 GN=TCM_027152 PE=4 SV=1	2.075
A0A1U8MT25	dual specificity protein phosphatase PHS1-like isoform X3 OS=Gossypium hirsutum OX=3635 GN=LOC107939816	0.609
A0A1U8MT85	protein E6-like OS=Gossypium hirsutum OX=3635 GN=LOC107941059	7.077
A0A1U8MU26	RNA-directed DNA polymerase homolog OS=Gossypium hirsutum OX=3635 GN=LOC107941278	2.841
A0A1U8MUE7	protein SUPPRESSOR OF MAX2 1-like OS=Gossypium hirsutum OX=3635 GN=LOC107941412	0.625
A0A1U8MUQ1	At5g19860 OS=Arabidopsis thaliana OX=3702 GN=At5g19860 PE=2 SV=1	1.508
A0A1U8MUY5	MLP-like protein 423 OS=Gossypium hirsutum OX=3635 GN=LOC107940427	0.575
A0A1U8MUZ6	metacaspase-9-like OS=Gossypium hirsutum OX=3635 GN=LOC107941590	0.394
A0A1U8MV17	"ATP sulfurylase 1, chloroplastic-like OS=Gossypium hirsutum OX=3635 GN=LOC107941612"	1.816
A0A1U8MV36	probable 2-oxoglutarate-dependent dioxygenase AOP1 OS=Gossypium hirsutum OX=3635 GN=LOC107941627	7.202
A0A1U8MV80	MLO-like protein OS=Gossypium hirsutum OX=3635 GN=LOC107941659	2.017
A0A1U8MVA2	Carboxypeptidase OS=Gossypium hirsutum OX=3635 GN=LOC107941679	1.829
A0A1U8MVW1	UPF0587 protein C1orf123 homolog OS=Gossypium hirsutum OX=3635 GN=LOC107941862	0.651
A0A1U8MW19	cytochrome P450 81E8-like OS=Gossypium hirsutum OX=3635 GN=LOC107941921	1.554
A0A1U8MW28	L-lactate dehydrogenase OS=Gossypium hirsutum OX=3635 GN=LOC107940833	4.454
A0A1U8MW54	extensin-2-like OS=Gossypium hirsutum OX=3635 GN=LOC107941957	2.253
A0A1U8MWF3	biotin--protein ligase 2-like OS=Gossypium hirsutum OX=3635 GN=LOC107942037	0.533
A0A1U8MWG1	probable 2-oxoglutarate-dependent dioxygenase AOP1 OS=Gossypium hirsutum OX=3635 GN=LOC107942044	3.026
A0A1U8MWW6	glycine-rich cell wall structural protein isoform X2 OS=Gossypium hirsutum OX=3635 GN=LOC107942203	1.94
A0A1U8MX18	protein RCC2 homolog OS=Gossypium hirsutum OX=3635 GN=LOC107942262	1.523
A0A1U8MXC6	Glycosyltransferase OS=Gossypium hirsutum OX=3635 GN=LOC107942355	0.332
A0A1U8MXD1	probable methyltransferase PMT26 OS=Gossypium hirsutum OX=3635 GN=LOC107942358	1.526
A0A1U8MXI2	60S ribosomal protein L38-like OS=Gossypium hirsutum OX=3635 GN=LOC107942364	1.675
A0A1U8MXU5	elicitor-responsive protein 1-like OS=Gossypium hirsutum OX=3635 GN=LOC107942491	1.762
A0A1U8MY10	tetraspanin-8-like OS=Gossypium hirsutum OX=3635 GN=LOC107941418	1.814
A0A1U8MY84	glycerophosphodiester phosphodiesterase GDPD6-like OS=Gossypium hirsutum OX=3635 GN=LOC107941453	1.667
A0A1U8MYI2	serine/arginine-rich splicing factor RS2Z32-like isoform X4 OS=Gossypium hirsutum OX=3635 GN=LOC107941565	0.387
A0A1U8MYL4	Pyruvate kinase OS=Gossypium hirsutum OX=3635 GN=LOC107942729	1.819
A0A1U8MYW5	12S seed storage protein CRD-like OS=Gossypium hirsutum OX=3635 GN=LOC107942781	0.659
A0A1U8MZK8	cathepsin B-like isoform X2 OS=Gossypium hirsutum OX=3635 GN=LOC107941895	1.841
A0A1U8MZM0	importin-5-like OS=Gossypium hirsutum OX=3635 GN=LOC107943030	0.522
A0A1U8MZN5	acyl-CoA-binding protein-like OS=Gossypium hirsutum OX=3635 GN=LOC107943045	0.48
A0A1U8MZV5	Uricase OS=Gossypium hirsutum OX=3635 GN=LOC107943104	2.407
A0A1U8MZZ0	ABC transporter B family member 2-like OS=Gossypium hirsutum OX=3635 GN=LOC107942025	0.361
A0A1U8N020	probable 2-oxoglutarate-dependent dioxygenase AOP1 OS=Gossypium hirsutum OX=3635 GN=LOC107942041	3.435
A0A1U8N051	endonuclease 1-like isoform X3 OS=Gossypium hirsutum OX=3635 GN=LOC107942074	3.059
A0A1U8N052	Aconitate hydratase OS=Gossypium hirsutum OX=3635 GN=LOC107943236	0.637
A0A1U8N069	Putative malate dehydrogenase OS=Gossypium arboreum OX=29729 GN=F383_13950 PE=4 SV=1	0.351
A0A1U8N090	"crocetin glucosyltransferase, chloroplastic-like OS=Gossypium hirsutum OX=3635 GN=LOC107942101"	0.646
A0A1U8N0P4	transcription factor TCP7-like OS=Gossypium hirsutum OX=3635 GN=LOC107942277	0.55
A0A1U8N0Q3	strigolactone esterase D14-like OS=Gossypium hirsutum OX=3635 GN=LOC107942286	4.827
A0A1U8N123	"endo-1,31,4-beta-D-glucanase-like OS=Gossypium hirsutum OX=3635 GN=LOC107943554"	0.577
A0A1U8N1A8	xyloglucan glycosyltransferase 4-like OS=Gossypium hirsutum OX=3635 GN=LOC107942460	2.369
A0A1U8N1B1	equilibrative nucleotide transporter 1-like OS=Gossypium hirsutum OX=3635 GN=LOC107943625	0.58
A0A1U8N1C1	actin-like OS=Gossypium hirsutum OX=3635 GN=LOC107943635	0.556
A0A1U8N1K2	glycine-rich cell wall structural protein 1.8-like OS=Gossypium hirsutum OX=3635 GN=LOC107943695	3.358
A0A1U8N1R7	probable serine/threonine-protein kinase At1g54610 isoform X2 OS=Gossypium hirsutum OX=3635 GN=LOC107943755	0.468
A0A1U8N285	60S ribosomal protein L13a-4 OS=Gossypium hirsutum OX=3635 GN=LOC107943908	1.604
A0A1U8N2J8	PTI1-like tyrosine-protein kinase At3g15890 OS=Gossypium hirsutum OX=3635 GN=LOC107943958	0.513
A0A1U8N310	cytochrome P450 CYP82D47-like OS=Gossypium hirsutum OX=3635 GN=LOC107944158	2.308
A0A1U8N331	"glucan endo-1,3-beta-glucosidase-like OS=Gossypium hirsutum OX=3635 GN=LOC107944179"	3.248
A0A1U8N364	Sulfotransferase OS=Gossypium hirsutum OX=3635 GN=LOC107944137	1.557
A0A1U8N393	Condensin complex subunit 3 OS=Gossypium arboreum OX=29729 GN=F383_19550 PE=4 SV=1	0.486
A0A1U8N3D4	transmembrane protein 120 homolog OS=Gossypium hirsutum OX=3635 GN=LOC107944287	0.664
A0A1U8N3G8	importin-5-like OS=Gossypium hirsutum OX=3635 GN=LOC107944248	0.533
A0A1U8N3U6	Lipase OS=Gossypium arboreum OX=29729 GN=F383_00262 PE=4 SV=1	3.427
A0A1U8N402	"pentatricopeptide repeat-containing protein At3g61520, mitochondrial-like OS=Gossypium hirsutum OX=3635 GN=LOC107943314"	0.59
A0A1U8N4C1	probable calcium-binding protein CML13 OS=Gossypium hirsutum OX=3635 GN=LOC107943447	0.559
A0A1U8N4K4	heavy metal-associated isoprenylated plant protein 3-like OS=Gossypium hirsutum OX=3635 GN=LOC107944703	0.599
A0A1U8N4L8	phosphoethanolamine N-methyltransferase 1-like OS=Gossypium hirsutum OX=3635 GN=LOC107944617	0.598
A0A1U8N4Q3	"glycine-rich RNA-binding protein 2, mitochondrial-like OS=Gossypium hirsutum OX=3635 GN=LOC107943566"	0.446
A0A1U8N5C7	asparagine synthetase [glutamine-hydrolyzing]-like OS=Gossypium hirsutum OX=3635 GN=LOC107945000	0.577
A0A1U8N5P8	GDSL esterase/lipase At5g45950 OS=Gossypium hirsutum OX=3635 GN=LOC107943866	0.522
A0A1U8N5X3	snakin-1-like OS=Gossypium hirsutum OX=3635 GN=LOC107945146	0.292
A0A1U8N650	villin-3-like OS=Gossypium hirsutum OX=3635 GN=LOC107944032	0.618
A0A1U8N654	probable aldo-keto reductase 1 OS=Gossypium hirsutum OX=3635 GN=LOC107943991	0.522
A0A1U8N698	D-3-phosphoglycerate dehydrogenase OS=Gossypium hirsutum OX=3635 GN=LOC107945142	0.337
A0A1U8N6G4	RNA-binding protein 38-like OS=Gossypium hirsutum OX=3635 GN=LOC107944088	0.446
A0A1U8N6J9	polygalacturonase QRT3-like OS=Gossypium hirsutum OX=3635 GN=LOC107945292	0.543
A0A1U8N6X5	protein DMR6-LIKE OXYGENASE 1-like OS=Gossypium hirsutum OX=3635 GN=LOC107944299	1.753
A0A1U8N6Z5	nuclear transcription factor Y subunit C-1-like OS=Gossypium hirsutum OX=3635 GN=LOC107944317	0.586
A0A1U8N7R0	glutamine--fructose-6-phosphate aminotransferase [isomerizing] 2-like OS=Gossypium hirsutum OX=3635 GN=LOC107945602	1.687
A0A1U8N7R3	Terpene cyclase/mutase family member OS=Gossypium hirsutum OX=3635 GN=LOC107944512	0.504
A0A1U8N7V9	"probable acyl-activating enzyme 18, peroxisomal isoform X1 OS=Gossypium hirsutum OX=3635 GN=LOC107945518"	0.55
A0A1U8N7Y9	Remorin family protein OS=Theobroma cacao OX=3641 GN=TCM_005370 PE=4 SV=1	0.502
A0A1U8N7Z6	bifunctional epoxide hydrolase 2-like OS=Gossypium hirsutum OX=3635 GN=LOC107944583	0.636
A0A1U8N819	"glucan endo-1,3-beta-glucosidase 4-like OS=Gossypium hirsutum OX=3635 GN=LOC107945572"	2.952
A0A1U8N867	3-phosphoshikimate 1-carboxyvinyltransferase OS=Gossypium hirsutum OX=3635 GN=LOC107945613	0.503
A0A1U8N8L7	leucine-rich repeat receptor-like kinase protein THICK TASSEL DWARF1 OS=Gossypium hirsutum OX=3635 GN=LOC107945818	0.522
A0A1U8N919	Peroxidase OS=Gossypium hirsutum OX=3635 GN=LOC107944980	2.976
A0A1U8N984	Adenine nucleotide alpha hydrolases-like superfamily protein isoform 1 OS=Theobroma cacao OX=3641 GN=TCM_006869 PE=4 SV=1	3.149
A0A1U8N9B8	caffeoyl-CoA O-methyltransferase 5 OS=Gossypium hirsutum OX=3635 GN=LOC107945134	1.964
A0A1U8N9B9	germin-like protein subfamily 2 member 4 OS=Gossypium hirsutum OX=3635 GN=LOC107945922	2.191
A0A1U8N9G4	BnaA09g51150D protein OS=Brassica napus OX=3708 GN=BnaA09g51150D PE=4 SV=1	0.389
A0A1U8N9K0	ABC transporter B family member 4-like OS=Gossypium hirsutum OX=3635 GN=LOC107945989	1.733
A0A1U8NA20	"aldehyde dehydrogenase family 2 member B4, mitochondrial-like isoform X2 OS=Gossypium hirsutum OX=3635 GN=LOC107946218"	1.645
A0A1U8NA34	copper-transporting ATPase RAN1-like OS=Gossypium hirsutum OX=3635 GN=LOC107945236	1.778
A0A1U8NAA4	villin-2-like OS=Gossypium hirsutum OX=3635 GN=LOC107945380	0.611
A0A1U8NAD7	HMG-Y-related protein B-like OS=Gossypium hirsutum OX=3635 GN=LOC107946285	0.565
A0A1U8NAK2	transmembrane protein 97-like OS=Gossypium hirsutum OX=3635 GN=LOC107946331	4.794
A0A1U8NAK8	probable peroxygenase 4 OS=Gossypium hirsutum OX=3635 GN=LOC107946288	0.325
A0A1U8NAL1	Dirigent protein OS=Gossypium hirsutum OX=3635 GN=LOC107945454	2.168
A0A1U8NAM1	Glutamate decarboxylase OS=Gossypium hirsutum OX=3635 GN=LOC107946304	0.575
A0A1U8NB49	ras-related protein Rab7-like OS=Gossypium hirsutum OX=3635 GN=LOC107945511	0.3
A0A1U8NB62	leucoanthocyanidin reductase-like OS=Gossypium hirsutum OX=3635 GN=LOC107946451	0.387
A0A1U8NBF7	ABC transporter A family member 7-like OS=Gossypium hirsutum OX=3635 GN=LOC107946504	3.104
A0A1U8NBG6	Argininosuccinate synthase OS=Gossypium arboreum OX=29729 GN=F383_30036 PE=4 SV=1	1.731
A0A1U8NBT3	Pectate lyase OS=Gossypium hirsutum OX=3635 GN=LOC107946592	2.508
A0A1U8NBV3	"naringenin,2-oxoglutarate 3-dioxygenase isoform X1 OS=Gossypium hirsutum OX=3635 GN=LOC107945804"	0.271
A0A1U8NBW4	LOW QUALITY PROTEIN: protein MEI2-like 1 OS=Gossypium hirsutum OX=3635 GN=LOC107946615	0.361
A0A1U8NBY4	Inositol polyphosphate multikinase OS=Gossypium hirsutum OX=3635 GN=LOC107946632	0.561
A0A1U8NC03	CSC1-like protein At1g32090 OS=Gossypium hirsutum OX=3635 GN=LOC107946650	0.512
A0A1U8NC08	beta-glucosidase 44-like OS=Gossypium hirsutum OX=3635 GN=LOC107945844	0.366
A0A1U8NC09	Glycosyltransferase OS=Gossypium hirsutum OX=3635 GN=LOC107946649	1.602
A0A1U8NC26	cyclic nucleotide-gated ion channel 1-like isoform X2 OS=Gossypium hirsutum OX=3635 GN=LOC107945860	0.371
A0A1U8NC32	binding partner of ACD11 1-like OS=Gossypium hirsutum OX=3635 GN=LOC107946672	1.583
A0A1U8NC64	"naringenin,2-oxoglutarate 3-dioxygenase isoform X2 OS=Gossypium hirsutum OX=3635 GN=LOC107945804"	0.4
A0A1U8NC91	AAA-ATPase At1g43910-like OS=Gossypium hirsutum OX=3635 GN=LOC107945820	3.417
A0A1U8NC95	haloacid dehalogenase-like hydrolase domain-containing protein Sgpp isoform X2 OS=Gossypium hirsutum OX=3635 GN=LOC107946716	1.605
A0A1U8NCF3	5'-3' exoribonuclease OS=Gossypium hirsutum OX=3635 GN=LOC107945963	0.617
A0A1U8NCF4	Secretory carrier-associated membrane protein OS=Gossypium hirsutum OX=3635 GN=LOC107945873	2.023
A0A1U8NCP9	mitochondrial carnitine/acylcarnitine carrier-like protein OS=Gossypium hirsutum OX=3635 GN=LOC107946829	1.501
A0A1U8ND22	myb-like protein J OS=Gossypium hirsutum OX=3635 GN=LOC107946923	0.616
A0A1U8ND59	probable calcium-binding protein CML13 OS=Gossypium hirsutum OX=3635 GN=LOC107946953	0.574
A0A1U8NDB4	remorin-like OS=Gossypium hirsutum OX=3635 GN=LOC107947012	0.255
A0A1U8NDE5	"D-cysteine desulfhydrase 2, mitochondrial-like OS=Gossypium hirsutum OX=3635 GN=LOC107946252"	0.666
A0A1U8NDI4	HMG-Y-related protein A-like OS=Gossypium hirsutum OX=3635 GN=LOC107946286	0.629
A0A1U8NE18	nascent polypeptide-associated complex subunit alpha-like protein 2 OS=Gossypium hirsutum OX=3635 GN=LOC107947184	1.789
A0A1U8NEA8	"cell division topological specificity factor homolog, chloroplastic-like OS=Gossypium hirsutum OX=3635 GN=LOC107946389"	0.618
A0A1U8NEF2	probable carboxylesterase 120 OS=Gossypium hirsutum OX=3635 GN=LOC107947291	2.212
A0A1U8NEL0	hevamine-A-like isoform X1 OS=Gossypium hirsutum OX=3635 GN=LOC107947331	3.166
A0A1U8NEL4	phosphoenolpyruvate carboxylase 4-like OS=Gossypium hirsutum OX=3635 GN=LOC107946467	0.607
A0A1U8NEM1	Putative late blight resistance R1A-3 OS=Gossypium arboreum OX=29729 GN=F383_03689 PE=4 SV=1	2.537
A0A1U8NER1	probable methyltransferase PMT21 isoform X1 OS=Gossypium hirsutum OX=3635 GN=LOC107947370	3.491
A0A1U8NEU1	fatty acid amide hydrolase-like OS=Gossypium hirsutum OX=3635 GN=LOC107947389	0.479
A0A1U8NF92	dynamin-related protein 1E-like OS=Gossypium hirsutum OX=3635 GN=LOC107946714	0.52
A0A1U8NFA1	inactive protein RESTRICTED TEV MOVEMENT 2-like OS=Gossypium hirsutum OX=3635 GN=LOC107947611	0.495
A0A1U8NFP9	V-type proton ATPase subunit E OS=Gossypium hirsutum OX=3635 GN=LOC107947841	1.538
A0A1U8NFS6	AT-hook motif nuclear-localized protein 13-like OS=Gossypium hirsutum OX=3635 GN=LOC107946743	0.596
A0A1U8NFW3	protein GRIM REAPER-like OS=Gossypium hirsutum OX=3635 GN=LOC107947950	7.023
A0A1U8NGL9	"putative transferase At4g12130, mitochondrial OS=Gossypium hirsutum OX=3635 GN=LOC107946955"	0.606
A0A1U8NGR2	3-hydroxy-3-methylglutaryl coenzyme A synthase OS=Gossypium hirsutum OX=3635 GN=LOC107946991	1.913
A0A1U8NGW1	Glutamate decarboxylase OS=Gossypium hirsutum OX=3635 GN=LOC107948303	2.197
A0A1U8NGW6	probable serine/threonine-protein kinase At5g41260 isoform X2 OS=Gossypium hirsutum OX=3635 GN=LOC107947028	2.669
A0A1U8NH16	caffeic acid 3-O-methyltransferase-like isoform X1 OS=Gossypium hirsutum OX=3635 GN=LOC107947186	4.569
A0A1U8NH32	"29 kDa ribonucleoprotein A, chloroplastic-like OS=Gossypium hirsutum OX=3635 GN=LOC107948368"	0.424
A0A1U8NH60	syntaxin-71-like OS=Gossypium hirsutum OX=3635 GN=LOC107948314	0.639
A0A1U8NH92	glutathione S-transferase U17-like OS=Gossypium hirsutum OX=3635 GN=LOC107948407	0.423
A0A1U8NHA2	DNA polymerase delta small subunit-like OS=Gossypium hirsutum OX=3635 GN=LOC107948426	0.654
A0A1U8NHC4	"shikimate kinase 1, chloroplastic-like OS=Gossypium hirsutum OX=3635 GN=LOC107948413"	0.63
A0A1U8NHE1	V-type proton ATPase subunit G OS=Gossypium hirsutum OX=3635 GN=LOC107948358	1.516
A0A1U8NHL6	protein IQ-DOMAIN 1-like isoform X2 OS=Gossypium hirsutum OX=3635 GN=LOC107947239	0.195
A0A1U8NHR3	WD repeat-containing protein LWD1-like OS=Gossypium hirsutum OX=3635 GN=LOC107948442	0.22
A0A1U8NHV5	trihelix transcription factor GT-3b-like OS=Gossypium hirsutum OX=3635 GN=LOC107948595	2.676
A0A1U8NI79	Non-specific lipid transfer protein-like 1 OS=Gossypium arboreum OX=29729 GN=F383_14215 PE=4 SV=1	2.796
A0A1U8NI95	Fiber protein Fb34 OS=Gossypium barbadense OX=3634 PE=2 SV=1	2.053
A0A1U8NIU9	ras-related protein RABE1c-like OS=Gossypium hirsutum OX=3635 GN=LOC107948822	0.624
A0A1U8NIV1	"short-chain dehydrogenase TIC 32, chloroplastic-like isoform X1 OS=Gossypium hirsutum OX=3635 GN=LOC107948830"	0.438
A0A1U8NJ44	metallothionein-like protein 2 OS=Gossypium hirsutum OX=3635 GN=LOC107948896	0.602
A0A1U8NJU3	nitronate monooxygenase-like OS=Gossypium hirsutum OX=3635 GN=LOC107949140	0.625
A0A1U8NJV1	E3 ubiquitin-protein ligase ORTHRUS 2-like protein OS=Gossypium arboreum OX=29729 GN=F383_13276 PE=4 SV=1	1.63
A0A1U8NK06	probable LRR receptor-like serine/threonine-protein kinase At4g08850 OS=Gossypium hirsutum OX=3635 GN=LOC107949002	0.658
A0A1U8NKL9	uncharacterized isomerase BH0283-like OS=Gossypium hirsutum OX=3635 GN=LOC107949172	1.805
A0A1U8NKY5	"DNAJ heat shock N-terminal domain-containing protein, putative OS=Theobroma cacao OX=3641 GN=TCM_014092 PE=4 SV=1"	0.663
A0A1U8NL87	"glutamate-1-semialdehyde 2,1-aminomutase 2, chloroplastic isoform X1 OS=Gossypium hirsutum OX=3635 GN=LOC107949601"	1.632
A0A1U8NLC5	respiratory burst oxidase homolog protein C-like OS=Gossypium hirsutum OX=3635 GN=LOC107949620	1.644
A0A1U8NLG2	protein NBR1 homolog OS=Gossypium hirsutum OX=3635 GN=LOC107949640	1.529
A0A1U8NLI3	germinal center kinase 1-like isoform X2 OS=Gossypium hirsutum OX=3635 GN=LOC107948762	0.585
A0A1U8NLM0	ubiquitin domain-containing protein 1-like OS=Gossypium hirsutum OX=3635 GN=LOC107948792	0.64
A0A1U8NLP1	vignain-like OS=Gossypium hirsutum OX=3635 GN=LOC107949718	0.525
A0A1U8NLP8	nuclear pore complex protein NUP50A-like OS=Gossypium hirsutum OX=3635 GN=LOC107949582	1.557
A0A1U8NLX9	Replication protein A subunit OS=Gossypium hirsutum OX=3635 GN=LOC107949785	2.301
A0A1U8NM68	desiccation-related protein PCC13-62-like OS=Gossypium hirsutum OX=3635 GN=LOC107949722	3.142
A0A1U8NMF8	protein SUPPRESSOR OF K(+) TRANSPORT GROWTH DEFECT 1-like OS=Gossypium hirsutum OX=3635 GN=LOC107949028	1.58
A0A1U8NN46	protein EXORDIUM-like 2 OS=Gossypium hirsutum OX=3635 GN=LOC107949141	0.627
A0A1U8NNF1	cytochrome P450 87A3-like OS=Gossypium hirsutum OX=3635 GN=LOC107950217	0.578
A0A1U8NP54	"D-xylose-proton symporter-like 3, chloroplastic OS=Gossypium hirsutum OX=3635 GN=LOC107950323"	0.593
A0A1U8NP75	caffeoylshikimate esterase-like isoform X2 OS=Gossypium hirsutum OX=3635 GN=LOC107949563	1.878
A0A1U8NPB1	ras-related protein RHN1-like isoform X2 OS=Gossypium hirsutum OX=3635 GN=LOC107949588	0.579
A0A1U8NPC4	phosphoenolpyruvate carboxykinase [ATP]-like OS=Gossypium hirsutum OX=3635 GN=LOC107950503	1.891
A0A1U8NPG3	"glucan 1,3-beta-glucosidase A-like OS=Gossypium hirsutum OX=3635 GN=LOC107950403"	2.229
A0A1U8NPL0	HSP20-like chaperones superfamily protein isoform 1 OS=Theobroma cacao OX=3641 GN=TCM_004634 PE=4 SV=1	0.577
A0A1U8NPQ0	Glycosyltransferase OS=Gossypium hirsutum OX=3635 GN=LOC107950603	0.159
A0A1U8NPR8	glycine-rich domain-containing protein 2-like isoform X2 OS=Gossypium hirsutum OX=3635 GN=LOC107950492	1.85
A0A1U8NPW9	cytochrome P450 89A2-like OS=Gossypium hirsutum OX=3635 GN=LOC107950660	0.633
A0A1U8NQB9	"beta-fructofuranosidase, insoluble isoenzyme CWINV1-like OS=Gossypium hirsutum OX=3635 GN=LOC107950663"	3.575
A0A1U8NQZ6	cytochrome b5-like OS=Gossypium hirsutum OX=3635 GN=LOC107951031	0.356
A0A1U8NR07	abscisic acid receptor PYR1-like OS=Gossypium hirsutum OX=3635 GN=LOC107950128	1.72
A0A1U8NR20	Maternal effect embryo arrest 59 OS=Theobroma cacao OX=3641 GN=TCM_041686 PE=4 SV=1	0.474
A0A1U8NR46	very-long-chain 3-oxoacyl-CoA reductase 1-like OS=Gossypium hirsutum OX=3635 GN=LOC107950163	0.395
A0A1U8NR65	UDP-glucuronic acid decarboxylase 5 isoform X2 OS=Gossypium hirsutum OX=3635 GN=LOC107950264	0.633
A0A1U8NR76	CBS domain-containing protein CBSCBSPB5-like isoform X3 OS=Gossypium hirsutum OX=3635 GN=LOC107950181	0.646
A0A1U8NRB7	acyl-coenzyme A thioesterase 13-like OS=Gossypium hirsutum OX=3635 GN=LOC107950209	1.636
A0A1U8NRN3	phototropin-1 OS=Gossypium hirsutum OX=3635 GN=LOC107950311	0.652
A0A1U8NS55	PLASMODESMATA CALLOSE-BINDING PROTEIN 3-like isoform X2 OS=Gossypium hirsutum OX=3635 GN=LOC107951231	0.466
A0A1U8NS78	probable serine/threonine-protein kinase DDB_G0276461 isoform X2 OS=Gossypium hirsutum OX=3635 GN=LOC107950468	0.556
A0A1U8NS88	"biotin carboxylase 1, chloroplastic-like isoform X2 OS=Gossypium hirsutum OX=3635 GN=LOC107951345"	0.587
A0A1U8NSL2	probable cinnamyl alcohol dehydrogenase 9 OS=Gossypium hirsutum OX=3635 GN=LOC107950586	0.339
A0A1U8NSS8	DPP6 N-terminal domain-like protein OS=Theobroma cacao OX=3641 GN=TCM_035186 PE=4 SV=1	1.56
A0A1U8NTC8	probable receptor-like protein kinase At5g18500 OS=Gossypium hirsutum OX=3635 GN=LOC107951538	1.522
A0A1U8NTI5	Thioesterase superfamily protein OS=Theobroma cacao OX=3641 GN=TCM_046683 PE=4 SV=1	0.528
A0A1U8NTI7	inositol-3-phosphate synthase OS=Gossypium hirsutum OX=3635 GN=LOC107951681	0.347
A0A1U8NTK0	GDSL esterase/lipase At1g29670-like OS=Gossypium hirsutum OX=3635 GN=LOC107951019	1.771
A0A1U8NTR1	haloacid dehalogenase-like hydrolase domain-containing protein At4g39970 OS=Gossypium hirsutum OX=3635 GN=LOC107951724	0.586
A0A1U8NTS8	7-deoxyloganetic acid glucosyltransferase-like OS=Gossypium hirsutum OX=3635 GN=LOC107951640	1.651
A0A1U8NTV7	subtilisin-like protease SBT1.7 isoform X1 OS=Gossypium hirsutum OX=3635 GN=LOC107951027	0.388
A0A1U8NTW7	isoflavone 2'-hydroxylase-like OS=Gossypium hirsutum OX=3635 GN=LOC107951036	0.567
A0A1U8NU04	Allergen Act d 3 OS=Gossypium arboreum OX=29729 GN=F383_15057 PE=4 SV=1	0.639
A0A1U8NU20	flavonoid 3'-monooxygenase-like OS=Gossypium hirsutum OX=3635 GN=LOC107951075	2.694
A0A1U8NU88	H/ACA ribonucleoprotein complex subunit 2-like protein OS=Gossypium hirsutum OX=3635 GN=LOC107951197	0.563
A0A1U8NUV4	alcohol dehydrogenase class-P-like OS=Gossypium hirsutum OX=3635 GN=LOC107952016	1.759
A0A1U8NUV9	aspartic proteinase Asp1-like isoform X2 OS=Gossypium hirsutum OX=3635 GN=LOC107952036	2.363
A0A1U8NV30	synaptotagmin-2-like isoform X1 OS=Gossypium hirsutum OX=3635 GN=LOC107951341	0.49
A0A1U8NVJ7	S-adenosylmethionine synthase OS=Gossypium hirsutum OX=3635 GN=LOC107951536	3.993
A0A1U8NVL0	putative RNA-binding protein Luc7-like 1 OS=Gossypium hirsutum OX=3635 GN=LOC107952120	1.567
A0A1U8NW65	ubiquitin-conjugating enzyme E2 variant 1C-like OS=Gossypium hirsutum OX=3635 GN=LOC107951706	0.376
A0A1U8NWL4	homeobox-leucine zipper protein ANTHOCYANINLESS 2-like isoform X2 OS=Gossypium hirsutum OX=3635 GN=LOC107952707	0.407
A0A1U8NWS4	caffeoylshikimate esterase-like OS=Gossypium hirsutum OX=3635 GN=LOC107951875	1.861
A0A1U8NWX9	plant intracellular Ras-group-related LRR protein 4-like OS=Gossypium hirsutum OX=3635 GN=LOC107952799	0.654
A0A1U8NWY8	mitochondrial import receptor subunit TOM9-2-like OS=Gossypium hirsutum OX=3635 GN=LOC107952725	1.528
A0A1U8NX30	Peroxidase OS=Gossypium hirsutum OX=3635 GN=LOC107951876	0.528
A0A1U8NX49	nuclear pore complex protein NUP50A-like OS=Gossypium hirsutum OX=3635 GN=LOC107951895	1.851
A0A1U8NX75	dolichol-phosphate mannosyltransferase subunit 1-like OS=Gossypium hirsutum OX=3635 GN=LOC107951981	1.559
A0A1U8NX81	Long-chain-alcohol oxidase OS=Gossypium hirsutum OX=3635 GN=LOC107952882	0.533
A0A1U8NXC9	At2g04280 OS=Arabidopsis thaliana OX=3702 GN=AT2G04280.1 PE=2 SV=1	1.922
A0A1U8NXW0	3-ketoacyl-CoA synthase OS=Gossypium hirsutum OX=3635 GN=LOC107953001	0.256
A0A1U8NY05	salutaridine reductase-like isoform X2 OS=Gossypium hirsutum OX=3635 GN=LOC107953124	0.57
A0A1U8NY29	"2-C-methyl-D-erythritol 2,4-cyclodiphosphate synthase OS=Gossypium hirsutum OX=3635 GN=LOC107952123"	1.684
A0A1U8NY35	protein STRICTOSIDINE SYNTHASE-LIKE 3-like OS=Gossypium hirsutum OX=3635 GN=LOC107953142	0.392
A0A1U8NY36	Histone H2A OS=Gossypium hirsutum OX=3635 GN=LOC107952215	0.665
A0A1U8NYL4	dihydropyrimidinase-like OS=Gossypium hirsutum OX=3635 GN=LOC107953244	2.017
A0A1U8NYP5	remorin-like isoform X1 OS=Gossypium hirsutum OX=3635 GN=LOC107952353	0.321
A0A1U8NYS2	UDP-N-acetylglucosamine--N-acetylmuramyl- (Pentapeptide) pyrophosphoryl-undecaprenol N-acetylglucosamine transferase-like OS=Gossypium hirsutum OX=3635 GN=LOC107953335	0.511
A0A1U8NYW0	protein STRICTOSIDINE SYNTHASE-LIKE 11-like OS=Gossypium hirsutum OX=3635 GN=LOC107953358	3.325
A0A1U8NYW9	Dirigent protein OS=Gossypium hirsutum OX=3635 GN=LOC107952533	1.582
A0A1U8NYZ5	esterase-like OS=Gossypium hirsutum OX=3635 GN=LOC107952463	2.448
A0A1U8NZH4	cysteine-rich repeat secretory protein 56-like OS=Gossypium hirsutum OX=3635 GN=LOC107952724	1.533
A0A1U8NZT5	Cytochrome b561 and DOMON domain-containing protein OS=Gossypium hirsutum OX=3635 GN=LOC107952801	10.003
A0A1U8NZZ2	aspartyl protease family protein 2-like OS=Gossypium hirsutum OX=3635 GN=LOC107952960	3.386
A0A1U8NZZ5	UDP-arabinopyranose mutase 1-like OS=Gossypium hirsutum OX=3635 GN=LOC107952845	1.816
A0A1U8P0G9	chitotriosidase-1-like OS=Gossypium hirsutum OX=3635 GN=LOC107953812	3.067
A0A1U8P0U3	Pyrroline-5-carboxylate reductase OS=Gossypium hirsutum OX=3635 GN=LOC107953821	1.579
A0A1U8P1G1	"LOW QUALITY PROTEIN: calcium-transporting ATPase 1, endoplasmic reticulum-type-like OS=Gossypium hirsutum OX=3635 GN=LOC107954090"	1.574
A0A1U8P1I1	protein YLS9-like OS=Gossypium hirsutum OX=3635 GN=LOC107953159 PE=4 SV=1	0.663
A0A1U8P1M0	"ketol-acid reductoisomerase, chloroplastic-like OS=Gossypium hirsutum OX=3635 GN=LOC107953339"	0.48
A0A1U8P1N3	B3 domain-containing transcription factor VRN1-like isoform X2 OS=Gossypium hirsutum OX=3635 GN=LOC107954153	0.661
A0A1U8P1V9	protein ECERIFERUM 1-like OS=Gossypium hirsutum OX=3635 GN=LOC107954139	0.59
A0A1U8P1W3	hevamine-A-like OS=Gossypium hirsutum OX=3635 GN=LOC107954142	3.867
A0A1U8P1X7	Basic-leucine zipper transcription factor family protein isoform 1 OS=Theobroma cacao OX=3641 GN=TCM_006946 PE=4 SV=1	0.65
A0A1U8P243	UDP-glucose 6-dehydrogenase OS=Gossypium hirsutum OX=3635 GN=LOC107953472	2.601
A0A1U8P269	ABC transporter B family member 25-like OS=Gossypium hirsutum OX=3635 GN=LOC107953493	1.9
A0A1U8P2A6	"flavonoid 3',5'-hydroxylase 2-like OS=Gossypium hirsutum OX=3635 GN=LOC107954320"	0.261
A0A1U8P2J4	random slug protein 5-like isoform X2 OS=Gossypium hirsutum OX=3635 GN=LOC107953590	0.437
A0A1U8P2K9	"superoxide dismutase [Fe], chloroplastic-like OS=Gossypium hirsutum OX=3635 GN=LOC107953603"	1.668
A0A1U8P2T2	S-adenosylmethionine synthase OS=Gossypium hirsutum OX=3635 GN=LOC107954389	1.664
A0A1U8P349	Malic enzyme OS=Gossypium hirsutum OX=3635 GN=LOC107953852	2.159
A0A1U8P371	"transketolase, chloroplastic OS=Gossypium hirsutum OX=3635 GN=LOC107954570"	0.556
A0A1U8P389	late embryogenesis abundant protein Lea14-A OS=Gossypium hirsutum OX=3635 GN=LOC107954515	2.845
A0A1U8P3J5	Cytochrome b561 and DOMON domain-containing protein OS=Gossypium hirsutum OX=3635 GN=LOC107954670	4.739
A0A1U8P3Y3	"putative quinone-oxidoreductase homolog, chloroplastic OS=Gossypium hirsutum OX=3635 GN=LOC107953985"	0.543
A0A1U8P404	HMG-Y-related protein A-like OS=Gossypium hirsutum OX=3635 GN=LOC107954787	0.496
A0A1U8P4B4	E3 ubiquitin-protein ligase At3g02290-like OS=Gossypium hirsutum OX=3635 GN=LOC107954892	0.527
A0A1U8P4G6	Alpha/beta-Hydrolases superfamily protein isoform 1 OS=Theobroma cacao OX=3641 GN=TCM_041438 PE=4 SV=1	0.512
A0A1U8P4H2	Epoxide hydrolase 2 OS=Gossypium arboreum OX=29729 GN=F383_03600 PE=4 SV=1	0.662
A0A1U8P4K4	cysteine-rich repeat secretory protein 55-like OS=Gossypium hirsutum OX=3635 GN=LOC107954967	1.691
A0A1U8P4L4	Proline--tRNA ligase OS=Gossypium arboreum OX=29729 GN=F383_05332 PE=4 SV=1	0.655
A0A1U8P4M8	Putative ywbO OS=Gossypium arboreum OX=29729 GN=F383_19933 PE=4 SV=1	2.576
A0A1U8P4V4	"putative quinone-oxidoreductase homolog, chloroplastic OS=Gossypium hirsutum OX=3635 GN=LOC107954966"	0.431
A0A1U8P528	long chain acyl-CoA synthetase 1-like OS=Gossypium hirsutum OX=3635 GN=LOC107954375	0.364
A0A1U8P564	dihydropyrimidinase-like OS=Gossypium hirsutum OX=3635 GN=LOC107954335	1.711
A0A1U8P5G6	aspartyl protease family protein 2-like OS=Gossypium hirsutum OX=3635 GN=LOC107954487	2.902
A0A1U8P5H5	small EDRK-rich factor 2-like isoform X2 OS=Gossypium hirsutum OX=3635 GN=LOC107955246	0.568
A0A1U8P641	WD repeat-containing protein 70-like OS=Gossypium hirsutum OX=3635 GN=LOC107955419	0.545
A0A1U8P6B1	Cytochrome b561 and DOMON domain-containing protein OS=Gossypium hirsutum OX=3635 GN=LOC107955387	0.65
A0A1U8P6J4	AAA-ATPase At3g28580-like isoform X2 OS=Gossypium hirsutum OX=3635 GN=LOC107955558	1.861
A0A1U8P6N8	"aldehyde dehydrogenase family 2 member B7, mitochondrial-like OS=Gossypium hirsutum OX=3635 GN=LOC107955587"	1.928
A0A1U8P6R7	ABC transporter B family member 19-like isoform X1 OS=Gossypium hirsutum OX=3635 GN=LOC107955536	0.652
A0A1U8P6Z1	Putative ywbO OS=Gossypium arboreum OX=29729 GN=F383_19933 PE=4 SV=1	2.072
A0A1U8P7L5	fruit protein pKIWI501-like OS=Gossypium hirsutum OX=3635 GN=LOC107955038	0.54
A0A1U8P7N4	BnaC03g14830D protein OS=Brassica napus OX=3708 GN=BnaC03g14830D PE=4 SV=1	1.597
A0A1U8P7N7	peptide methionine sulfoxide reductase A1-like OS=Gossypium hirsutum OX=3635 GN=LOC107955101	0.538
A0A1U8P894	probable LRR receptor-like serine/threonine-protein kinase At5g48740 isoform X2 OS=Gossypium hirsutum OX=3635 GN=LOC107955242	0.249
A0A1U8P8C6	desiccation protectant protein Lea14 homolog OS=Gossypium hirsutum OX=3635 GN=LOC107955262	5.459
A0A1U8P945	AT-hook motif nuclear-localized protein 7-like OS=Gossypium hirsutum OX=3635 GN=LOC107956649	1.759
A0A1U8P964	Nucleus-like protein OS=Theobroma cacao OX=3641 GN=TCM_018651 PE=4 SV=1	1.763
A0A1U8P975	putative defensin-like protein 263 OS=Gossypium hirsutum OX=3635 GN=LOC107956604	0.151
A0A1U8P9B5	At2g04280 OS=Arabidopsis thaliana OX=3702 GN=AT2G04280.1 PE=2 SV=1	1.583
A0A1U8P9I7	WUSCHEL-related homeobox 13-like OS=Gossypium hirsutum OX=3635 GN=LOC107955627	0.627
A0A1U8P9N1	"glucan endo-1,3-beta-glucosidase 13-like OS=Gossypium hirsutum OX=3635 GN=LOC107955664"	1.559
A0A1U8P9R5	cold and drought-regulated protein CORA-like isoform X2 OS=Gossypium hirsutum OX=3635 GN=LOC107955730	3.021
A0A1U8P9U8	KH domain-containing protein At2g38610-like OS=Gossypium hirsutum OX=3635 GN=LOC107957048	0.641
A0A1U8P9V2	fruit protein pKIWI501-like OS=Gossypium hirsutum OX=3635 GN=LOC107955736	0.643
A0A1U8P9Y0	Peroxidase OS=Gossypium hirsutum OX=3635 GN=LOC107957038	3.403
A0A1U8P9Z5	tRNA (Cytosine-5-)-methyltransferase OS=Gossypium arboreum OX=29729 GN=F383_36248 PE=4 SV=1	1.837
A0A1U8PA48	Elongation factor 1-alpha OS=Gossypium hirsutum OX=3635 GN=LOC107957148	1.87
A0A1U8PAB6	cytosolic endo-beta-N-acetylglucosaminidase 1-like OS=Gossypium hirsutum OX=3635 GN=LOC107957163	1.535
A0A1U8PAH9	Transmembrane 9 superfamily member OS=Gossypium hirsutum OX=3635 GN=LOC107957210	0.516
A0A1U8PAI2	remorin-like OS=Gossypium hirsutum OX=3635 GN=LOC107957249	0.266
A0A1U8PAP8	agamous-like MADS-box protein AGL6 OS=Gossypium hirsutum OX=3635 GN=LOC107957285	0.424
A0A1U8PAQ3	synaptotagmin-4-like OS=Gossypium hirsutum OX=3635 GN=LOC107957294	0.618
A0A1U8PB31	serine/threonine-protein kinase-like protein CCR2 isoform X2 OS=Gossypium hirsutum OX=3635 GN=LOC107957388	0.329
A0A1U8PBF2	Protein translocase subunit SecA OS=Gossypium arboreum OX=29729 GN=F383_34178 PE=4 SV=1	0.263
A0A1U8PCB9	2-dehydro-3-deoxy-D-gluconate 5-dehydrogenase-like isoform X2 OS=Gossypium hirsutum OX=3635 GN=LOC107957029	0.536
A0A1U8PCC1	protein EXORDIUM-like OS=Gossypium hirsutum OX=3635 GN=LOC107957769	1.668
A0A1U8PCE3	sugar transport protein 5-like OS=Gossypium hirsutum OX=3635 GN=LOC107957750	0.334
A0A1U8PD64	Lissencephaly-1 OS=Gossypium arboreum OX=29729 GN=F383_06238 PE=4 SV=1	0.631
A0A1U8PDC8	probable carboxylesterase 8 OS=Gossypium hirsutum OX=3635 GN=LOC107957292	0.631
A0A1U8PDI6	probable carboxylesterase 2 OS=Gossypium hirsutum OX=3635 GN=LOC107958105	1.73
A0A1U8PDM0	patellin-6-like OS=Gossypium hirsutum OX=3635 GN=LOC107958089	0.639
A0A1U8PDQ3	cysteine proteinase RD21a-like OS=Gossypium hirsutum OX=3635 GN=LOC107958148	1.7
A0A1U8PDS7	"3-oxo-Delta(4,5)-steroid 5-beta-reductase-like OS=Gossypium hirsutum OX=3635 GN=LOC107958170"	0.62
A0A1U8PDZ4	patellin-3-like OS=Gossypium hirsutum OX=3635 GN=LOC107957498	0.338
A0A1U8PE00	patellin-3-like OS=Gossypium hirsutum OX=3635 GN=LOC107957497	0.619
A0A1U8PE10	GDSL esterase/lipase At1g29670-like OS=Gossypium hirsutum OX=3635 GN=LOC107957503	2.438
A0A1U8PE86	respiratory burst oxidase homolog protein D-like OS=Gossypium hirsutum OX=3635 GN=LOC107957571	1.72
A0A1U8PEF8	protein STRUBBELIG-RECEPTOR FAMILY 6-like isoform X2 OS=Gossypium hirsutum OX=3635 GN=LOC107958338	1.525
A0A1U8PEM6	NDR1/HIN1-Like protein 3-like OS=Gossypium hirsutum OX=3635 GN=LOC107958390	0.356
A0A1U8PEQ4	putative laccase-9 OS=Gossypium hirsutum OX=3635 GN=LOC107957697	2.71
A0A1U8PEX6	ABC transporter G family member 39-like isoform X2 OS=Gossypium hirsutum OX=3635 GN=LOC107958479	0.452
A0A1U8PF24	Glycosyltransferase OS=Gossypium hirsutum OX=3635 GN=LOC107957768	1.519
A0A1U8PF71	MADS-box transcription factor 23-like isoform X6 OS=Gossypium hirsutum OX=3635 GN=LOC107957842	0.397
A0A1U8PFE4	"aldehyde dehydrogenase family 2 member B7, mitochondrial-like OS=Gossypium hirsutum OX=3635 GN=LOC107958575"	1.601
A0A1U8PFI0	Vacuolar membrane-associated iml1 OS=Gossypium arboreum OX=29729 GN=F383_22584 PE=4 SV=1	1.799
A0A1U8PFM5	DNA/RNA-binding protein Alba-like protein OS=Corchorus capsularis OX=210143 GN=CCACVL1_03166 PE=4 SV=1	0.663
A0A1U8PFN9	glutathione S-transferase L3-like OS=Gossypium hirsutum OX=3635 GN=LOC107957970	2.181
A0A1U8PG48	protein TIFY 3B-like OS=Gossypium hirsutum OX=3635 GN=LOC107958809	0.508
A0A1U8PG98	17.3 kDa class II heat shock protein-like OS=Gossypium hirsutum OX=3635 GN=LOC107958855	0.479
A0A1U8PGE3	probable protein phosphatase 2C 12 OS=Gossypium hirsutum OX=3635 GN=LOC107958110	1.98
A0A1U8PGE5	"3-oxo-Delta(4,5)-steroid 5-beta-reductase-like OS=Gossypium hirsutum OX=3635 GN=LOC107958171"	1.953
A0A1U8PGS0	1-acyl-sn-glycerol-3-phosphate acyltransferase OS=Gossypium hirsutum OX=3635 GN=LOC107958945	0.6
A0A1U8PGS5	glutathionyl-hydroquinone reductase YqjG-like isoform X2 OS=Gossypium hirsutum OX=3635 GN=LOC107958307	2.256
A0A1U8PGW4	Trimethylguanosine synthase OS=Gossypium arboreum OX=29729 GN=F383_31857 PE=4 SV=1	0.645
A0A1U8PGW8	"Thiamine thiazole synthase, chloroplastic OS=Gossypium hirsutum OX=3635 GN=LOC107958248"	0.439
A0A1U8PGZ1	probable aquaporin PIP2-2 OS=Gossypium hirsutum OX=3635 GN=LOC107959028	0.63
A0A1U8PH29	CSC1-like protein ERD4 OS=Gossypium hirsutum OX=3635 GN=LOC107958300	0.234
A0A1U8PH94	Expansin OS=Gossypium hirsutum OX=3635 GN=LOC107959120	2.144
A0A1U8PH97	ras-related protein RABE1c OS=Gossypium hirsutum OX=3635 GN=LOC107959088	0.543
A0A1U8PHJ5	pyruvate decarboxylase 1 OS=Gossypium hirsutum OX=3635 GN=LOC107958418	2.557
A0A1U8PHS4	probable serine protease EDA2 OS=Gossypium hirsutum OX=3635 GN=LOC107958476	1.993
A0A1U8PHT0	indole-3-acetaldehyde oxidase-like OS=Gossypium hirsutum OX=3635 GN=LOC107959240	0.629
A0A1U8PI05	Glycosyltransferase OS=Gossypium hirsutum OX=3635 GN=LOC107959323	1.769
A0A1U8PI91	Dimeric alpha-beta barrel OS=Corchorus capsularis OX=210143 GN=CCACVL1_25471 PE=4 SV=1	0.294
A0A1U8PIP5	miraculin-like OS=Gossypium hirsutum OX=3635 GN=LOC107959495	3.393
A0A1U8PIP9	Pathogenesis-related PR-1 type OS=Gossypium arboreum OX=29729 GN=F383_18428 PE=4 SV=1	2.359
A0A1U8PIV4	laccase-14-like OS=Gossypium hirsutum OX=3635 GN=LOC107959552	1.586
A0A1U8PIX8	"Basic helix-loop-helix DNA-binding superfamily protein, putative isoform 1 OS=Theobroma cacao OX=3641 GN=TCM_000985 PE=4 SV=1"	0.577
A0A1U8PIZ9	WD repeat-containing protein 55-like OS=Gossypium hirsutum OX=3635 GN=LOC107959602	0.647
A0A1U8PJ29	auxin-binding protein ABP20-like OS=Gossypium hirsutum OX=3635 GN=LOC107958834	0.287
A0A1U8PJA0	BURP domain protein RD22-like isoform X2 OS=Gossypium hirsutum OX=3635 GN=LOC107958896	0.658
A0A1U8PJA6	V-type proton ATPase subunit D-like OS=Gossypium hirsutum OX=3635 GN=LOC107959679	1.7
A0A1U8PJE6	serine/threonine-protein kinase STY8-like OS=Gossypium hirsutum OX=3635 GN=LOC107959707	0.516
A0A1U8PJZ6	E3 UFM1-protein ligase 1 homolog OS=Gossypium hirsutum OX=3635 GN=LOC107959076	3.171
A0A1U8PK47	protein SIEVE ELEMENT OCCLUSION B-like OS=Gossypium hirsutum OX=3635 GN=LOC107959905	2.287
A0A1U8PK61	Bile acid-inducible operon CD OS=Gossypium arboreum OX=29729 GN=F383_12975 PE=4 SV=1	0.618
A0A1U8PKA0	ubiquitin carboxyl-terminal hydrolase 12-like OS=Gossypium hirsutum OX=3635 GN=LOC107959238	0.562
A0A1U8PKE4	"Coproporphyrinogen-III oxidase, aerobic OS=Gossypium arboreum OX=29729 GN=F383_21354 PE=4 SV=1"	0.651
A0A1U8PKU3	Aldehyde dehydrogenase OS=Gossypium hirsutum OX=3635 GN=LOC107959306	0.242
A0A1U8PL79	Lactoylglutathione lyase OS=Gossypium hirsutum OX=3635 GN=LOC107960179	0.648
A0A1U8PLD2	vesicle-fusing ATPase-like isoform X4 OS=Gossypium hirsutum OX=3635 GN=LOC107960208	1.572
A0A1U8PLD4	"30S ribosomal protein S5, chloroplastic-like OS=Gossypium hirsutum OX=3635 GN=LOC107960211"	0.656
A0A1U8PLG4	GDSL esterase/lipase At1g29670-like OS=Gossypium hirsutum OX=3635 GN=LOC107960246	0.606
A0A1U8PLL8	oligouridylate-binding protein 1B-like OS=Gossypium hirsutum OX=3635 GN=LOC107960286	0.611
A0A1U8PMK9	"stearoyl-[acyl-carrier-protein] 9-desaturase 6, chloroplastic-like OS=Gossypium hirsutum OX=3635 GN=LOC107960621"	1.681
A0A1U8PMS9	actin-58-like OS=Gossypium hirsutum OX=3635 GN=LOC107959871	0.574
A0A1U8PNE8	Ferritin OS=Gossypium hirsutum OX=3635 GN=LOC107960065	0.587
A0A1U8PNU5	"nudix hydrolase 15, mitochondrial-like OS=Gossypium hirsutum OX=3635 GN=LOC107960228"	0.662
A0A1U8PNW8	fumarylacetoacetase-like OS=Gossypium hirsutum OX=3635 GN=LOC107960169	0.542
A0A1U8PPA3	protein ECERIFERUM 1-like OS=Gossypium hirsutum OX=3635 GN=LOC107960346	0.602
A0A1U8PPU8	protein BIG GRAIN 1-like B OS=Gossypium hirsutum OX=3635 GN=LOC107961654	4.466
A0A1U8PPW7	Pectinesterase OS=Gossypium hirsutum OX=3635 GN=LOC107961647	2.095
A0A1U8PQF3	bifunctional dihydrofolate reductase-thymidylate synthase-like OS=Gossypium hirsutum OX=3635 GN=LOC107960692	0.545
A0A1U8PQN1	peroxisomal (S)-2-hydroxy-acid oxidase GLO4-like isoform X2 OS=Gossypium hirsutum OX=3635 GN=LOC107961836	0.353
A0A1U8PRG1	1-aminocyclopropane-1-carboxylate oxidase-like OS=Gossypium hirsutum OX=3635 GN=LOC107962059	0.618
A0A1U8PRN7	zinc finger CCCH domain-containing protein 53-like isoform X2 OS=Gossypium hirsutum OX=3635 GN=LOC107962102	0.425
A0A1U8PS38	Acetyl-coenzyme A synthetase OS=Gossypium hirsutum OX=3635 GN=LOC107962199	1.82
A0A1U8PS57	2-hydroxy-6-oxononadienedioate/2-hydroxy-6- oxononatrienedioate hydrolase 1-like OS=Gossypium hirsutum OX=3635 GN=LOC107961629	0.364
A0A1U8PSG3	cell wall / vacuolar inhibitor of fructosidase 2-like OS=Gossypium hirsutum OX=3635 GN=LOC107962267	0.162
A0A1U8PSI6	MLP-like protein 423 OS=Gossypium hirsutum OX=3635 GN=LOC107961673	0.663
A0A1U8PSK7	low-temperature-induced cysteine proteinase-like OS=Gossypium hirsutum OX=3635 GN=LOC107962322	0.613
A0A1U8PSM2	importin-5-like isoform X1 OS=Gossypium hirsutum OX=3635 GN=LOC107961715	0.542
A0A1U8PSM7	probable sarcosine oxidase OS=Gossypium hirsutum OX=3635 GN=LOC107962338	0.503
A0A1U8PSN4	probable carboxylesterase 15 OS=Gossypium hirsutum OX=3635 GN=LOC107962345	2.55
A0A1U8PSR7	T-complex protein 1 subunit theta-like OS=Gossypium hirsutum OX=3635 GN=LOC107962370	1.664
A0A1U8PSX5	UDP-arabinose 4-epimerase 1 OS=Gossypium hirsutum OX=3635 GN=LOC107962394	2.663
A0A1U8PT23	RNA-binding protein 38-like OS=Gossypium hirsutum OX=3635 GN=LOC107962431	0.469
A0A1U8PTD2	RPM1-interacting protein 4-like OS=Gossypium hirsutum OX=3635 GN=LOC107961948	0.074
A0A1U8PTI0	sugar transport protein 7-like OS=Gossypium hirsutum OX=3635 GN=LOC107962537	0.557
A0A1U8PTN4	serine/arginine-rich SC35-like splicing factor SCL30 OS=Gossypium hirsutum OX=3635 GN=LOC107962023	1.576
A0A1U8PTQ6	methyl-CpG-binding domain-containing protein 11-like OS=Gossypium hirsutum OX=3635 GN=LOC107962605	2.125
A0A1U8PTQ7	cytochrome P450 77A4-like OS=Gossypium hirsutum OX=3635 GN=LOC107961980	0.34
A0A1U8PUA3	sugar transport protein 14-like OS=Gossypium hirsutum OX=3635 GN=LOC107962740	1.629
A0A1U8PUH5	L-ascorbate oxidase-like OS=Gossypium hirsutum OX=3635 GN=LOC107962792	0.63
A0A1U8PV35	alpha-crystallin domain-containing protein 22.3-like OS=Gossypium hirsutum OX=3635 GN=LOC107962324	1.707
A0A1U8PV70	Glutathione peroxidase OS=Gossypium hirsutum OX=3635 GN=LOC107962973	2.037
A0A1U8PVB0	Tubulin beta chain OS=Gossypium hirsutum OX=3635 GN=LOC107962977	0.605
A0A1U8PVG0	reticuline oxidase-like protein OS=Gossypium hirsutum OX=3635 GN=LOC107962404	2.479
A0A1U8PW66	aldehyde dehydrogenase family 2 member C4-like OS=Gossypium hirsutum OX=3635 GN=LOC107962664	2.37
A0A1U8PWQ2	flavonoid 3'-monooxygenase-like OS=Gossypium hirsutum OX=3635 GN=LOC107963672	2.327
A0A1U8PWS2	protein phosphatase 2C and cyclic nucleotide-binding/kinase domain-containing protein-like OS=Gossypium hirsutum OX=3635 GN=LOC107962743	0.339
A0A1U8PWS9	RPM1-interacting protein 4-like OS=Gossypium hirsutum OX=3635 GN=LOC107962808	0.54
A0A1U8PWT2	3-hydroxy-3-methylglutaryl coenzyme A synthase OS=Gossypium hirsutum OX=3635 GN=LOC107963679	0.557
A0A1U8PX54	Cytokinin riboside 5'-monophosphate phosphoribohydrolase OS=Gossypium hirsutum OX=3635 GN=LOC107962827	0.47
A0A1U8PXB5	RING-type E3 ubiquitin transferase OS=Gossypium hirsutum OX=3635 GN=LOC107962869	1.871
A0A1U8PXG7	Glycosyltransferase OS=Gossypium hirsutum OX=3635 GN=LOC107963855	0.473
A0A1U8PXH4	transcription initiation factor TFIID subunit 15b-like OS=Gossypium hirsutum OX=3635 GN=LOC107963857	0.634
A0A1U8PXI5	Protein disulfide-isomerase OS=Gossypium hirsutum OX=3635 GN=LOC107963870	2.427
A0A1U8PXT1	Lactoylglutathione lyase OS=Gossypium hirsutum OX=3635 GN=LOC107963915	5.861
A0A1U8PXU5	receptor-like protein kinase HERK 1 OS=Gossypium hirsutum OX=3635 GN=LOC107963925	1.622
A0A1U8PZ56	fumarylacetoacetase OS=Gossypium hirsutum OX=3635 GN=LOC107963711	0.391
A0A1U8PZ71	heavy metal-associated isoprenylated plant protein 3-like OS=Gossypium hirsutum OX=3635 GN=LOC107963725	0.585
A0A1U8PZN5	aquaporin PIP1-3-like OS=Gossypium hirsutum OX=3635 GN=LOC107963784	0.401
A0A1U8PZZ8	malonyl CoA-acyl carrier protein transacylase-like OS=Gossypium hirsutum OX=3635 GN=LOC107963860	0.624
A1XJ44	Actin depolymerizing factor 7 OS=Gossypium hirsutum OX=3635 GN=ADF7	0.635
A2IBG0	Dihydroflavonol 4-reductase OS=Gossypium hirsutum OX=3635 GN=DFR	0.304
A3F7Q2	Benzoquinone reductase OS=Gossypium hirsutum OX=3635 GN=LOC107917815	0.458
A7L2Z6	S-adenosylmethionine synthase OS=Gossypium hirsutum OX=3635 GN=SAMS	3.847
A8WCU3	Glutamine synthetase OS=Gossypium hirsutum OX=3635 GN=GS	1.751
A8WCU8	Glutamine synthetase OS=Gossypium hirsutum OX=3635 GN=GS	1.637
A9P7F0	Profilin OS=Gossypium hirsutum OX=3635 GN=PRF	0.303
A9XU45	3-ketoacyl-CoA synthase OS=Gossypium hirsutum OX=3635 GN=LOC107954085	0.334
B1NHU5	Fasciclin-like arabinogalactan protein 1 OS=Gossypium hirsutum OX=3635 GN=LOC107946184	1.831
B2Z3V3	Expansin OS=Gossypium hirsutum OX=3635 GN=EXPA8	0.444
B4XRA3	Glutathione S-transferase OS=Gossypium hirsutum OX=3635 GN=GST	2.794
B5AMJ6	Cinnamyl alcohol dehydrogenase OS=Gossypium hirsutum OX=3635 GN=CAD1	2.662
B5LXY1	Chalcone synthase OS=Gossypium hirsutum OX=3635 GN=LOC107914895	0.28
B8Q9D3	Aquaporin PIP23 OS=Gossypium hirsutum OX=3635 GN=PIP2;3	0.423
C9WF03	Peroxidase OS=Gossypium hirsutum OX=3635 GN=POX3	0.611
D2D2Z2	UDP-glucose 6-dehydrogenase OS=Gossypium hirsutum OX=3635 GN=LOC107911831	2.151
D2D2Z3	UDP-L-rhamnose synthase OS=Gossypium hirsutum OX=3635 GN=LOC107963680	0.618
D2D302	2-nitropropane dioxygenase OS=Gossypium hirsutum OX=3635 GN=LOC107942989	0.66
D2D336	Rhamnose synthase OS=Gossypium hirsutum OX=3635 GN=LOC107928094	1.518
D2WK23	UDP-L-rhamnose synthase OS=Gossypium hirsutum OX=3635 GN=UER2	0.444
D9DBW0	Aquaporin TIP1;7 OS=Gossypium hirsutum OX=3635 GN=GhTIP1;7	0.315
E3NZI7	Caffeoyl CoA O-methyltransferase 1 OS=Gossypium hirsutum OX=3635 GN=CCoAMOT1	4.785
E4W6N1	Caffeic acid O-methyltransferase 3 OS=Gossypium hirsutum OX=3635 GN=COMT3	4.449
F4YAW2	Copper binding protein 3 OS=Gossypium hirsutum OX=3635 GN=BCP3	1.601
H6WZ69	Purple acid phosphatase OS=Gossypium hirsutum OX=3635 GN=Pap10	1.917
J7FXM2	GSK1 OS=Gossypium hirsutum OX=3635 GN=GSK1	0.663
M1GN42	GA-stimulated transcript-like protein 1 OS=Gossypium hirsutum OX=3635 GN=GASL1	2.495
O22582	Histone H2B OS=Gossypium hirsutum OX=3635 GN=HIS2B	0.656
O23948	V-type proton ATPase subunit E OS=Gossypium hirsutum OX=3635 GN=VATE	1.63
P93154	Chitinase OS=Gossypium hirsutum OX=3635 GN=LOC107901348	7.503
Q01197	Protein E6 OS=Gossypium hirsutum OX=3635 GN=E6	0.16
Q2HPG3	Osmotin-like protein I OS=Gossypium hirsutum OX=3635 GN=OSMI	5.484
Q39778	E6-3 protein kinase OS=Gossypium hirsutum OX=3635 GN=E6-3	0.327
Q39799	Endochitinase 1 OS=Gossypium hirsutum OX=3635	3.685
Q39800	Delta-tonoplast intrinsic protein OS=Gossypium hirsutum OX=3635 GN=LOC107951644	2.258
Q3LUM1	Elongation factor 1-alpha OS=Gossypium hirsutum OX=3635 GN=EF1A6	1.656
Q3SAX1	Superoxide dismutase [Cu-Zn] OS=Gossypium hirsutum OX=3635 GN=LOC107893157	0.588
Q43434	V-type proton ATPase 16 kDa proteolipid subunit OS=Gossypium hirsutum OX=3635 GN=CVA16-2	1.933
Q4VIX3	Non-symbiotic hemoglobin protein OS=Gossypium hirsutum OX=3635 GN=LOC107898705	5.272
Q6UNK7	Peroxidase OS=Gossypium hirsutum OX=3635 GN=pod9	1.585
Q6VAF6	Tubulin beta-6 chain OS=Gossypium hirsutum OX=3635	0.52
Q6VAF8	Tubulin beta-3 chain OS=Gossypium hirsutum OX=3635	0.543
Q71V89	Histone H3.3 OS=Gossypium hirsutum OX=3635 GN=HIS3	0.592
Q7Y255	Auxin binding protein OS=Gossypium hirsutum OX=3635 GN=LOC107907099	0.375
Q8RVP7	Peroxidase OS=Gossypium hirsutum OX=3635 GN=pod3	3.206
Q8VWP9	3-ketoacyl-CoA synthase OS=Gossypium hirsutum OX=3635 GN=FDH	0.383
Q8W4Z5	CASP-like protein F16 OS=Gossypium hirsutum OX=3635 GN=F16	0.151
Q9FE19	PR protein class 10 OS=Gossypium hirsutum OX=3635 GN=LOC107898953	4.642
Q9FVA5	Non-specific lipid-transfer protein OS=Gossypium hirsutum OX=3635 GN=LTP1	0.169
S4TID2	Lipid transfer protein OS=Gossypium hirsutum OX=3635 GN=LTP9	3.172
S4U1Y3	DJ-1 protein homolog E-like OS=Gossypium hirsutum OX=3635 GN=LOC107924119	0.554
S4U5A3	protein YLS9-like OS=Gossypium hirsutum OX=3635 GN=LOC107889436	1.644
S5G619	Annexin OS=Gossypium hirsutum OX=3635 GN=LOC107896446	3.018
S5GI78	Annexin OS=Gossypium hirsutum OX=3635 GN=LOC107916313	0.528
